# Supplementary material
Source: publisher figshare collection journal article supplement (https://acs.figshare.com/ndownloader/files/9158752)
Supplement: Supplementary file 1 [file 9158752]

data_NIH28
_audit_creation_date              2017-05-05
_audit_creation_method
;
Olex2 1.2-beta
(compiled 2017.03.28 svn.r3405 for OlexSys, GUI svn.r5335)
;
_shelx_SHELXL_version_number      '2016/6'
_publ_contact_author_address      ?
_publ_contact_author_email        ?
_publ_contact_author_id_orcid     ?
_publ_contact_author_name         ''
_publ_contact_author_phone        ?
_publ_section_references
;
Dolomanov, O.V., Bourhis, L.J., Gildea, R.J, Howard, J.A.K. & Puschmann, H.
 (2009), J. Appl. Cryst. 42, 339-341.

Sheldrick, G.M. (2015). Acta Cryst. A71, 3-8.

Sheldrick, G.M. (2015). Acta Cryst. C71, 3-8.
;
_chemical_name_common             ?
_chemical_name_systematic         ?
_chemical_formula_moiety          'C12 H14 Cl N O2'
_chemical_formula_sum             'C12 H14 Cl N O2'
_chemical_formula_weight          239.69
_chemical_absolute_configuration  ad
_chemical_melting_point           ?
loop_
  _atom_type_symbol
  _atom_type_description
  _atom_type_scat_dispersion_real
  _atom_type_scat_dispersion_imag
  _atom_type_scat_source
 'C' 'C' 0.0033 0.0016 'International Tables Vol C Tables 4.2.6.8 and 6.1.1.4'
 'H' 'H' 0.0000 0.0000 'International Tables Vol C Tables 4.2.6.8 and 6.1.1.4'
 'Cl' 'Cl' 0.1484 0.1585 'International Tables Vol C Tables 4.2.6.8 and 6.1.1.4'
 'N' 'N' 0.0061 0.0033 'International Tables Vol C Tables 4.2.6.8 and 6.1.1.4'
 'O' 'O' 0.0106 0.0060 'International Tables Vol C Tables 4.2.6.8 and 6.1.1.4'

_shelx_space_group_comment
;
The symmetry employed for this shelxl refinement is uniquely defined
by the following loop, which should always be used as a source of
symmetry information in preference to the above space-group names.
They are only intended as comments.
;
_space_group_crystal_system       'orthorhombic'
_space_group_IT_number            19
_space_group_name_H-M_alt         'P 21 21 21'
_space_group_name_Hall            'P 2ac 2ab'
loop_
  _space_group_symop_operation_xyz
 'x, y, z'
 '-x+1/2, -y, z+1/2'
 '-x, y+1/2, -z+1/2'
 'x+1/2, -y+1/2, -z'

_cell_length_a                    7.3777(5)
_cell_length_b                    7.4315(5)
_cell_length_c                    20.1273(14)
_cell_angle_alpha                 90
_cell_angle_beta                  90
_cell_angle_gamma                 90
_cell_volume                      1103.53(13)
_cell_formula_units_Z             4
_cell_measurement_reflns_used     6833
_cell_measurement_temperature     100
_cell_measurement_theta_max       26.355
_cell_measurement_theta_min       2.922
_shelx_estimated_absorpt_T_max    0.982
_shelx_estimated_absorpt_T_min    0.947
_exptl_absorpt_coefficient_mu     0.330
_exptl_absorpt_correction_T_max   0.0932
_exptl_absorpt_correction_T_min   0.0697
_exptl_absorpt_correction_type    multi-scan
_exptl_absorpt_process_details
'SADABS-2016/2 (Bruker,2016/2) was used for absorption correction. wR2(int) was 0.0492 before and 0.0445 after correction. The Ratio of minimum to maximum transmission is 0.7479. The \l/2 correction factor is Not present.'
_exptl_absorpt_special_details    ?
_exptl_crystal_colour             Colorless
_exptl_crystal_colour_primary     Colorless
_exptl_crystal_density_diffrn     1.443
_exptl_crystal_density_meas       ?
_exptl_crystal_density_method     ?
_exptl_crystal_description        Block
_exptl_crystal_F_000              504
_exptl_crystal_size_max           0.167
_exptl_crystal_size_mid           0.133
_exptl_crystal_size_min           0.054
_exptl_transmission_factor_max    ?
_exptl_transmission_factor_min    ?
_diffrn_reflns_av_R_equivalents   0.0361
_diffrn_reflns_av_unetI/netI      0.0298
_diffrn_reflns_Laue_measured_fraction_full 0.999
_diffrn_reflns_Laue_measured_fraction_max 0.997
_diffrn_reflns_limit_h_max        7
_diffrn_reflns_limit_h_min        -9
_diffrn_reflns_limit_k_max        9
_diffrn_reflns_limit_k_min        -9
_diffrn_reflns_limit_l_max        25
_diffrn_reflns_limit_l_min        -25
_diffrn_reflns_number             13037
_diffrn_reflns_point_group_measured_fraction_full 0.999
_diffrn_reflns_point_group_measured_fraction_max 0.993
_diffrn_reflns_theta_full         25.000
_diffrn_reflns_theta_max          26.371
_diffrn_reflns_theta_min          2.922
_diffrn_ambient_temperature       100
_diffrn_detector                  'Bruker APEX-II CCD'
_diffrn_detector_area_resol_mean  7.9
_diffrn_detector_type             'CCD Area Detector'
_diffrn_measured_fraction_theta_full 0.999
_diffrn_measured_fraction_theta_max 0.997
_diffrn_measurement_device        'Kappa Four-Circle Diffractometer'
_diffrn_measurement_device_type   'Bruker X8 APEX II'
_diffrn_measurement_method        '\w and \f scans'
_diffrn_radiation_monochromator   graphite
_diffrn_radiation_probe           X-ray
_diffrn_radiation_type            MoK\a
_diffrn_radiation_wavelength      0.71073
_diffrn_radiation_xray_symbol     K-L~3~
_diffrn_source                    'sealed tube'
_diffrn_source_type               fine-focus
_diffrn_standards_number          0
_reflns_Friedel_coverage          0.683
_reflns_Friedel_fraction_full     1.000
_reflns_Friedel_fraction_max      0.986
_reflns_number_gt                 2052
_reflns_number_total              2250
_reflns_special_details
;
 Reflections were merged by SHELXL according to the crystal
 class for the calculation of statistics and refinement.
 
 _reflns_Friedel_fraction is defined as the number of unique
 Friedel pairs measured divided by the number that would be
 possible theoretically, ignoring centric projections and
 systematic absences.
;
_reflns_threshold_expression      'I > 2\s(I)'
_computing_cell_refinement        'SAINT v8.37A (Bruker, 2016)'
_computing_data_collection        'APEX3 v2016.9-0 (Bruker, 2016)'
_computing_data_reduction         'SAINT v8.37A (Bruker, 2016)'
_computing_molecular_graphics     'Olex2 (Dolomanov et al., 2009)'
_computing_publication_material   'Olex2 (Dolomanov et al., 2009)'
_computing_structure_refinement   'ShelXL (Sheldrick, 2015)'
_computing_structure_solution     'ShelXT (Sheldrick, 2015)'
_refine_diff_density_max          0.252
_refine_diff_density_min          -0.200
_refine_diff_density_rms          0.044
_refine_ls_abs_structure_details
;
 Flack x determined using 753 quotients [(I+)-(I-)]/[(I+)+(I-)]
 (Parsons, Flack and Wagner, Acta Cryst. B69 (2013) 249-259).
;
_refine_ls_abs_structure_Flack    -0.03(3)
_refine_ls_extinction_coef        .
_refine_ls_extinction_method      none
_refine_ls_goodness_of_fit_ref    1.095
_refine_ls_hydrogen_treatment     mixed
_refine_ls_matrix_type            full
_refine_ls_number_parameters      157
_refine_ls_number_reflns          2250
_refine_ls_number_restraints      3
_refine_ls_R_factor_all           0.0401
_refine_ls_R_factor_gt            0.0345
_refine_ls_restrained_S_all       1.097
_refine_ls_shift/su_max           0.001
_refine_ls_shift/su_mean          0.000
_refine_ls_structure_factor_coef  Fsqd
_refine_ls_weighting_details
'w=1/[\s^2^(Fo^2^)+(0.0280P)^2^+0.4460P] where P=(Fo^2^+2Fc^2^)/3'
_refine_ls_weighting_scheme       calc
_refine_ls_wR_factor_gt           0.0733
_refine_ls_wR_factor_ref          0.0753
_refine_special_details           ?
_olex2_refinement_description
;
1. Fixed Uiso
 At 1.2 times of:
  All C(H) groups, All C(H,H) groups
2. Restrained distances
 N1-H1A = N1-H1B = O2-H2
 0.95 with sigma of 0.02
3.a Ternary CH refined with riding coordinates:
 C10(H10)
3.b Secondary CH2 refined with riding coordinates:
 C9(H9A,H9B), C11(H11A,H11B), C12(H12A,H12B)
3.c Aromatic/amide H refined with riding coordinates:
 C2(H2A), C3(H3), C4(H4), C5(H5)
;
_atom_sites_solution_hydrogens    mixed
_atom_sites_solution_primary      dual
_atom_sites_solution_secondary    difmap
loop_
  _atom_site_label
  _atom_site_type_symbol
  _atom_site_fract_x
  _atom_site_fract_y
  _atom_site_fract_z
  _atom_site_U_iso_or_equiv
  _atom_site_adp_type
  _atom_site_occupancy
  _atom_site_site_symmetry_order
  _atom_site_calc_flag
  _atom_site_refinement_flags_posn
  _atom_site_refinement_flags_adp
  _atom_site_refinement_flags_occupancy
  _atom_site_disorder_assembly
  _atom_site_disorder_group
 Cl1 Cl 0.49629(12) 0.70762(10) 0.54547(3) 0.0322(2) Uani 1 1 d . . . . .
 O1 O 0.4679(2) 0.6601(2) 0.70498(9) 0.0235(4) Uani 1 1 d . . . . .
 O2 O 0.9947(3) 1.0103(2) 0.68066(9) 0.0251(4) Uani 1 1 d D . . . .
 H2 H 1.064(4) 0.971(5) 0.7159(14) 0.050(12) Uiso 1 1 d D . . . .
 N1 N 0.7887(3) 0.3891(3) 0.71084(11) 0.0199(5) Uani 1 1 d D . . . .
 H1A H 0.859(4) 0.293(4) 0.6955(15) 0.030(9) Uiso 1 1 d D . . . .
 H1B H 0.699(4) 0.347(4) 0.7366(14) 0.029(9) Uiso 1 1 d D . . . .
 C1 C 0.4593(4) 0.4826(4) 0.56783(14) 0.0231(7) Uani 1 1 d . . . . .
 C2 C 0.3169(4) 0.3965(5) 0.53523(15) 0.0302(7) Uani 1 1 d . . . . .
 H2A H 0.248243 0.457909 0.502366 0.036 Uiso 1 1 calc R . . . .
 C3 C 0.2779(4) 0.2218(5) 0.55141(17) 0.0375(8) Uani 1 1 d . . . . .
 H3 H 0.180959 0.161407 0.529764 0.045 Uiso 1 1 calc R . . . .
 C4 C 0.3782(4) 0.1332(5) 0.59884(17) 0.0353(8) Uani 1 1 d . . . . .
 H4 H 0.349057 0.012784 0.610544 0.042 Uiso 1 1 calc R . . . .
 C5 C 0.5213(4) 0.2197(4) 0.62938(13) 0.0241(6) Uani 1 1 d . . . . .
 H5 H 0.592531 0.155036 0.660636 0.029 Uiso 1 1 calc R . . . .
 C6 C 0.5651(3) 0.3987(4) 0.61596(13) 0.0178(6) Uani 1 1 d . . . . .
 C7 C 0.7140(4) 0.4961(4) 0.65543(13) 0.0167(6) Uani 1 1 d . . . . .
 C8 C 0.6279(4) 0.6592(4) 0.69174(13) 0.0174(6) Uani 1 1 d . . . . .
 C9 C 0.7525(4) 0.8070(4) 0.71355(14) 0.0215(6) Uani 1 1 d . . . . .
 H9A H 0.819604 0.767319 0.753547 0.026 Uiso 1 1 calc R . . . .
 H9B H 0.679486 0.913627 0.725905 0.026 Uiso 1 1 calc R . . . .
 C10 C 0.8887(4) 0.8606(4) 0.65947(14) 0.0212(6) Uani 1 1 d . . . . .
 H10 H 0.817922 0.899154 0.619558 0.025 Uiso 1 1 calc R . . . .
 C11 C 0.9989(4) 0.6960(4) 0.64000(12) 0.0222(5) Uani 1 1 d . . . . .
 H11A H 1.061882 0.647719 0.679600 0.027 Uiso 1 1 calc R . . . .
 H11B H 1.091822 0.730603 0.606894 0.027 Uiso 1 1 calc R . . . .
 C12 C 0.8747(4) 0.5499(4) 0.61041(14) 0.0204(6) Uani 1 1 d . . . . .
 H12A H 0.948299 0.441326 0.601217 0.024 Uiso 1 1 calc R . . . .
 H12B H 0.826281 0.593664 0.567480 0.024 Uiso 1 1 calc R . . . .

loop_
  _atom_site_aniso_label
  _atom_site_aniso_U_11
  _atom_site_aniso_U_22
  _atom_site_aniso_U_33
  _atom_site_aniso_U_23
  _atom_site_aniso_U_13
  _atom_site_aniso_U_12
 Cl1 0.0325(4) 0.0362(4) 0.0280(4) 0.0115(3) -0.0031(4) 0.0066(4)
 O1 0.0196(11) 0.0246(10) 0.0264(10) -0.0056(8) 0.0036(9) 0.0007(8)
 O2 0.0266(11) 0.0209(9) 0.0279(10) 0.0026(8) -0.0058(10) -0.0049(10)
 N1 0.0207(12) 0.0200(12) 0.0191(12) 0.0036(11) -0.0014(10) 0.0021(10)
 C1 0.0189(16) 0.0304(15) 0.0201(14) -0.0037(11) 0.0023(11) 0.0039(12)
 C2 0.0199(15) 0.050(2) 0.0207(16) -0.0088(15) -0.0029(12) 0.0051(15)
 C3 0.0225(16) 0.049(2) 0.0413(19) -0.0251(17) -0.0005(15) -0.0058(15)
 C4 0.0319(18) 0.0272(17) 0.047(2) -0.0140(16) 0.0082(16) -0.0108(14)
 C5 0.0238(16) 0.0217(13) 0.0268(14) -0.0051(11) 0.0051(14) 0.0005(14)
 C6 0.0150(13) 0.0237(14) 0.0145(13) -0.0038(11) 0.0037(10) 0.0004(11)
 C7 0.0173(14) 0.0166(13) 0.0162(13) 0.0003(11) -0.0010(11) 0.0013(11)
 C8 0.0213(14) 0.0188(14) 0.0120(13) 0.0034(10) -0.0020(11) -0.0001(11)
 C9 0.0233(14) 0.0182(13) 0.0230(14) -0.0003(12) -0.0011(12) 0.0028(12)
 C10 0.0214(14) 0.0211(14) 0.0211(14) 0.0007(12) -0.0033(12) -0.0034(12)
 C11 0.0174(13) 0.0280(14) 0.0210(13) 0.0022(11) -0.0003(12) -0.0059(15)
 C12 0.0168(14) 0.0238(15) 0.0205(14) -0.0009(12) 0.0029(12) -0.0002(11)

_geom_special_details
;
 All esds (except the esd in the dihedral angle between two l.s. planes)
 are estimated using the full covariance matrix.  The cell esds are taken
 into account individually in the estimation of esds in distances, angles
 and torsion angles; correlations between esds in cell parameters are only
 used when they are defined by crystal symmetry.  An approximate (isotropic)
 treatment of cell esds is used for estimating esds involving l.s. planes.
;
loop_
  _geom_bond_atom_site_label_1
  _geom_bond_atom_site_label_2
  _geom_bond_distance
  _geom_bond_site_symmetry_2
  _geom_bond_publ_flag
 Cl1 C1 1.753(3) . ?
 O1 C8 1.210(3) . ?
 O2 H2 0.92(2) . ?
 O2 C10 1.426(3) . ?
 N1 H1A 0.93(2) . ?
 N1 H1B 0.90(2) . ?
 N1 C7 1.477(3) . ?
 C1 C2 1.394(4) . ?
 C1 C6 1.392(4) . ?
 C2 H2A 0.9500 . ?
 C2 C3 1.369(5) . ?
 C3 H3 0.9500 . ?
 C3 C4 1.376(5) . ?
 C4 H4 0.9500 . ?
 C4 C5 1.381(4) . ?
 C5 H5 0.9500 . ?
 C5 C6 1.395(4) . ?
 C6 C7 1.537(4) . ?
 C7 C8 1.551(4) . ?
 C7 C12 1.545(4) . ?
 C8 C9 1.498(4) . ?
 C9 H9A 0.9900 . ?
 C9 H9B 0.9900 . ?
 C9 C10 1.534(4) . ?
 C10 H10 1.0000 . ?
 C10 C11 1.520(4) . ?
 C11 H11A 0.9900 . ?
 C11 H11B 0.9900 . ?
 C11 C12 1.541(4) . ?
 C12 H12A 0.9900 . ?
 C12 H12B 0.9900 . ?

loop_
  _geom_angle_atom_site_label_1
  _geom_angle_atom_site_label_2
  _geom_angle_atom_site_label_3
  _geom_angle
  _geom_angle_site_symmetry_1
  _geom_angle_site_symmetry_3
  _geom_angle_publ_flag
 C10 O2 H2 107(2) . . ?
 H1A N1 H1B 109(3) . . ?
 C7 N1 H1A 112(2) . . ?
 C7 N1 H1B 110(2) . . ?
 C2 C1 Cl1 115.7(2) . . ?
 C6 C1 Cl1 121.2(2) . . ?
 C6 C1 C2 123.0(3) . . ?
 C1 C2 H2A 120.6 . . ?
 C3 C2 C1 118.8(3) . . ?
 C3 C2 H2A 120.6 . . ?
 C2 C3 H3 119.8 . . ?
 C2 C3 C4 120.4(3) . . ?
 C4 C3 H3 119.8 . . ?
 C3 C4 H4 120.1 . . ?
 C3 C4 C5 119.8(3) . . ?
 C5 C4 H4 120.1 . . ?
 C4 C5 H5 118.8 . . ?
 C4 C5 C6 122.3(3) . . ?
 C6 C5 H5 118.8 . . ?
 C1 C6 C5 115.6(3) . . ?
 C1 C6 C7 123.3(3) . . ?
 C5 C6 C7 121.0(3) . . ?
 N1 C7 C6 113.8(2) . . ?
 N1 C7 C8 102.6(2) . . ?
 N1 C7 C12 107.2(2) . . ?
 C6 C7 C8 108.6(2) . . ?
 C6 C7 C12 111.5(2) . . ?
 C12 C7 C8 112.9(2) . . ?
 O1 C8 C7 120.5(2) . . ?
 O1 C8 C9 122.0(3) . . ?
 C9 C8 C7 117.4(2) . . ?
 C8 C9 H9A 109.1 . . ?
 C8 C9 H9B 109.1 . . ?
 C8 C9 C10 112.6(2) . . ?
 H9A C9 H9B 107.8 . . ?
 C10 C9 H9A 109.1 . . ?
 C10 C9 H9B 109.1 . . ?
 O2 C10 C9 110.5(2) . . ?
 O2 C10 H10 107.6 . . ?
 O2 C10 C11 114.3(2) . . ?
 C9 C10 H10 107.6 . . ?
 C11 C10 C9 108.9(2) . . ?
 C11 C10 H10 107.6 . . ?
 C10 C11 H11A 109.6 . . ?
 C10 C11 H11B 109.6 . . ?
 C10 C11 C12 110.4(2) . . ?
 H11A C11 H11B 108.1 . . ?
 C12 C11 H11A 109.6 . . ?
 C12 C11 H11B 109.6 . . ?
 C7 C12 H12A 108.7 . . ?
 C7 C12 H12B 108.7 . . ?
 C11 C12 C7 114.3(2) . . ?
 C11 C12 H12A 108.7 . . ?
 C11 C12 H12B 108.7 . . ?
 H12A C12 H12B 107.6 . . ?

loop_
  _geom_hbond_atom_site_label_D
  _geom_hbond_atom_site_label_H
  _geom_hbond_atom_site_label_A
  _geom_hbond_distance_DH
  _geom_hbond_distance_HA
  _geom_hbond_distance_DA
  _geom_hbond_angle_DHA
  _geom_hbond_site_symmetry_A
 O2 H2 N1 0.92(2) 1.93(2) 2.852(3) 179(3) 3_756
 N1 H1A O2 0.93(2) 2.35(2) 3.256(3) 164(3) 1_545
 N1 H1B O1 0.90(2) 2.20(2) 3.058(3) 161(3) 3_646

_shelx_res_file
;
TITL NIH28 in P2(1)2(1)2(1)
    nih28.res
    created by SHELXL-2016/6 at 10:07:27 on 05-May-2017
REM SHELXT solution in P2(1)2(1)2(1)
REM R1 0.096, Rweak 0.024, Alpha 0.002, Orientation as input
REM Flack x = -0.010 ( 0.027 ) from Parsons' quotients
REM Formula found by SHELXT: C12 N O2 Cl
CELL 0.71073 7.3777 7.4315 20.1273 90 90 90
ZERR 4 0.0005 0.0005 0.0014 0 0 0
LATT -1
SYMM 0.5-X,-Y,0.5+Z
SYMM -X,0.5+Y,0.5-Z
SYMM 0.5+X,0.5-Y,-Z
SFAC C H Cl N O
UNIT 48 56 4 4 8
EQIV $1 2-X,0.5+Y,1.5-Z
EQIV $2 1-X,-0.5+Y,1.5-Z
EQIV $3 +X,-1+Y,+Z
DFIX 0.95 N1 H1a N1 H1b O2 H2

L.S. 10
PLAN  20
SIZE 0.167 0.133 0.054
TEMP -173.15
HTAB O2 N1_$1
HTAB N1 O1_$2
HTAB N1 O2_$3
BOND $H
list 4
fmap 2
acta 50
REM <olex2.extras>
REM <HklSrc "%.\\NIH28.hkl">
REM </olex2.extras>

WGHT    0.028000    0.446000
FVAR       0.85170
CL1   3    0.496293    0.707624    0.545469    11.00000    0.03248    0.03621 =
         0.02802    0.01154   -0.00312    0.00665
O1    5    0.467940    0.660095    0.704984    11.00000    0.01956    0.02461 =
         0.02640   -0.00559    0.00365    0.00069
O2    5    0.994732    1.010343    0.680661    11.00000    0.02661    0.02094 =
         0.02788    0.00258   -0.00577   -0.00489
H2    2    1.063837    0.971249    0.715875    11.00000    0.05048
N1    4    0.788662    0.389074    0.710841    11.00000    0.02067    0.01995 =
         0.01914    0.00358   -0.00135    0.00206
H1A   2    0.858577    0.292792    0.695455    11.00000    0.03032
H1B   2    0.699122    0.346932    0.736564    11.00000    0.02862
C1    1    0.459253    0.482602    0.567834    11.00000    0.01891    0.03042 =
         0.02008   -0.00366    0.00233    0.00394
C2    1    0.316921    0.396490    0.535226    11.00000    0.01988    0.05019 =
         0.02066   -0.00885   -0.00285    0.00510
AFIX  43
H2A   2    0.248243    0.457909    0.502366    11.00000   -1.20000
AFIX   0
C3    1    0.277882    0.221789    0.551411    11.00000    0.02246    0.04884 =
         0.04134   -0.02509   -0.00045   -0.00582
AFIX  43
H3    2    0.180959    0.161407    0.529764    11.00000   -1.20000
AFIX   0
C4    1    0.378201    0.133196    0.598836    11.00000    0.03194    0.02723 =
         0.04674   -0.01399    0.00816   -0.01075
AFIX  43
H4    2    0.349057    0.012784    0.610544    11.00000   -1.20000
AFIX   0
C5    1    0.521337    0.219683    0.629378    11.00000    0.02382    0.02167 =
         0.02685   -0.00511    0.00514    0.00053
AFIX  43
H5    2    0.592531    0.155036    0.660636    11.00000   -1.20000
AFIX   0
C6    1    0.565122    0.398687    0.615957    11.00000    0.01500    0.02374 =
         0.01454   -0.00379    0.00374    0.00036
C7    1    0.713960    0.496143    0.655434    11.00000    0.01734    0.01656 =
         0.01616    0.00032   -0.00096    0.00134
C8    1    0.627938    0.659184    0.691736    11.00000    0.02127    0.01882 =
         0.01197    0.00340   -0.00205   -0.00010
C9    1    0.752498    0.806983    0.713549    11.00000    0.02332    0.01823 =
         0.02304   -0.00033   -0.00110    0.00285
AFIX  23
H9A   2    0.819604    0.767319    0.753547    11.00000   -1.20000
H9B   2    0.679486    0.913627    0.725905    11.00000   -1.20000
AFIX   0
C10   1    0.888656    0.860559    0.659472    11.00000    0.02143    0.02115 =
         0.02107    0.00071   -0.00333   -0.00341
AFIX  13
H10   2    0.817922    0.899154    0.619558    11.00000   -1.20000
AFIX   0
C11   1    0.998891    0.695991    0.639995    11.00000    0.01744    0.02802 =
         0.02099    0.00217   -0.00026   -0.00591
AFIX  23
H11A  2    1.061882    0.647719    0.679600    11.00000   -1.20000
H11B  2    1.091822    0.730603    0.606894    11.00000   -1.20000
AFIX   0
C12   1    0.874671    0.549877    0.610415    11.00000    0.01677    0.02384 =
         0.02053   -0.00091    0.00293   -0.00016
AFIX  23
H12A  2    0.948299    0.441326    0.601217    11.00000   -1.20000
H12B  2    0.826281    0.593664    0.567480    11.00000   -1.20000
AFIX   0
HKLF 4


REM  NIH28 in P2(1)2(1)2(1)
REM R1 =  0.0345 for    2052 Fo > 4sig(Fo)  and  0.0401 for all    2250 data
REM    157 parameters refined using      3 restraints

END

WGHT      0.0280      0.4468

REM Highest difference peak  0.252,  deepest hole -0.200,  1-sigma level  0.044
Q1    1   0.4840  0.5693  0.5507  11.00000  0.05    0.25
Q2    1   0.5064  0.3182  0.6389  11.00000  0.05    0.23
Q3    1   0.5727  0.7886  0.5812  11.00000  0.05    0.21
Q4    1   0.4832  0.4605  0.6068  11.00000  0.05    0.19
Q5    1   0.5758  0.2896  0.6071  11.00000  0.05    0.19
Q6    1   0.5615  0.6369  0.5827  11.00000  0.05    0.18
Q7    1   0.6997  0.7262  0.7027  11.00000  0.05    0.18
Q8    1   0.4876  0.1820  0.5936  11.00000  0.05    0.18
Q9    1   0.6249  0.4375  0.6368  11.00000  0.05    0.17
Q10   1   0.2773  0.3269  0.5029  11.00000  0.05    0.16
Q11   1   0.6753  0.5850  0.6642  11.00000  0.05    0.16
Q12   1   0.9357  0.6297  0.6178  11.00000  0.05    0.16
Q13   1   0.5615  0.6747  0.5022  11.00000  0.05    0.16
Q14   1   0.6010  0.4860  0.5730  11.00000  0.05    0.15
Q15   1   0.9377  0.7800  0.6514  11.00000  0.05    0.15
Q16   1   0.6254  0.7367  0.5364  11.00000  0.05    0.15
Q17   1   0.9985  0.9644  0.6320  11.00000  0.05    0.15
Q18   1   0.8274  0.8148  0.6869  11.00000  0.05    0.15
Q19   1   0.5079  0.5330  0.7173  11.00000  0.05    0.15
Q20   1   0.8071  0.5313  0.6374  11.00000  0.05    0.14
;
_shelx_res_checksum               99744
_shelx_hkl_file
;
   1   0   0    0.80    1.40
   1   0   0    0.80    1.90
  -1   0   0    0.80    1.30
  -1   0   0    2.10    1.60
   2   0   0 4957.00  125.19
   2   0   0 5069.89  123.79
  -2   0   0 5024.60  123.79
  -2   0   0 4912.01  125.29
   3   0   0    4.70    4.20
   3   0   0    2.30    3.20
  -3   0   0    4.00    4.10
  -3   0   0    8.10    3.70
  -4   0   0 3534.45   93.39
  -4   0   0 3560.04   96.29
  -4   0   0 3641.04   93.69
  -5   0   0    0.20    3.90
   5   0   0   -2.60    1.60
  -5   0   0    0.60    3.30
  -5   0   0    0.00    4.60
  -6   0   0  665.53   28.40
  -6   0   0  654.53   28.70
  -6   0   0  648.64   25.50
  -7   0   0   -3.10    7.40
  -7   0   0    4.30    5.50
  -8   0   0  600.24   31.30
  -8   0   0  654.43   27.70
  -9   0   0   -0.20    6.90
  -9   0   0   -2.40    7.50
   0   1   0    0.30    1.30
   0   1   0   -2.20    1.10
   0  -1   0    1.10    1.40
   0   1   0    1.30    1.20
   0  -1   0   -0.10    1.60
   0  -1   0    0.60    1.20
   0  -1   0    0.60    1.60
   0   1   0    2.00    1.50
   0   1   0    0.40    1.70
   1   1   0 1113.09   30.50
  -1   1   0 1111.49   27.80
  -1   1   0 1118.69   29.20
   1   1   0 1136.89   29.80
  -1  -1   0 1113.89   30.40
  -1  -1   0 1114.79   30.70
   1  -1   0 1080.19   29.20
   1   1   0 1103.59   30.40
   1   1   0 1112.09   30.40
   1  -1   0 1126.89   27.70
  -1  -1   0 1118.29   29.70
  -1  -1   0 1145.19   30.50
  -1  -1   0 1119.29   30.40
  -1   1   0 1123.29   29.60
  -2  -1   0   25.30    4.60
   2   1   0   25.60    3.60
  -2  -1   0   29.10    4.80
   2   1   0   26.40    5.10
  -2   1   0   27.20    3.50
   2  -1   0   31.70    4.90
   2  -1   0   32.20    3.60
   2   1   0   30.70    4.70
  -2  -1   0   31.20    5.10
   2  -1   0   23.50    2.90
   2   1   0   21.00    4.50
  -2   1   0   23.80    4.10
  -2  -1   0   34.40    5.20
  -3  -1   0   38.40    5.80
   3   1   0   42.00    3.00
   3   1   0   47.20    8.10
   3   1   0   50.69    4.60
  -3  -1   0   37.90    6.10
  -3   1   0   46.30    4.80
   3  -1   0   43.80    4.70
  -3  -1   0   50.39    7.60
   3  -1   0   37.40    6.20
  -3  -1   0   51.49    7.50
  -3   1   0   29.90    5.50
   3  -1   0   45.80    3.90
   3   1   0   43.20    7.00
  -4   1   0  941.11   29.20
   4   1   0  976.00   27.60
  -4   1   0  966.50   32.60
  -4  -1   0  974.00   33.90
  -4   1   0  974.00   26.50
  -4  -1   0 1035.40   32.40
  -4  -1   0  977.70   32.20
   4  -1   0 1004.20   26.20
  -5  -1   0  139.29   11.00
  -5  -1   0  153.88   12.80
  -5   1   0  150.58    9.80
  -5   1   0  141.09    5.70
   5   1   0  139.29    7.40
  -5   1   0  137.59   12.00
  -5   1   0  153.08    9.80
   5  -1   0  143.09    5.80
  -5   1   0  136.49    5.60
  -6  -1   0   59.19   10.50
  -6   1   0   55.69    9.60
  -6   1   0   45.80    7.30
  -6  -1   0   53.19    8.90
  -7   1   0  193.78   13.30
  -7   1   0  191.38   16.80
  -7  -1   0  193.08   17.00
  -7  -1   0  203.18   15.60
  -8   1   0  110.29   15.50
  -8   1   0  118.29   12.60
  -8  -1   0  118.59   13.50
  -8  -1   0  109.49   15.40
  -9   1   0   40.30    8.90
  -9   1   0   29.20   10.70
   0  -2   0 1123.79   31.90
   0  -2   0 1138.29   30.40
   0  -2   0 1147.29   31.80
   0   2   0 1148.49   32.00
   0   2   0 1093.19   30.30
   0   2   0 1156.08   31.90
   0  -2   0 1076.99   30.20
   0   2   0 1104.09   30.40
   0   2   0 1100.69   30.70
   1   2   0 1978.60   50.49
   1  -2   0 1729.73   46.70
   1  -2   0 1884.11   46.80
  -1   2   0 1881.31   49.70
   1   2   0 1830.22   50.29
  -1  -2   0 1971.20   50.39
  -1  -2   0 1931.81   50.59
  -1  -2   0 1894.71   50.39
  -1   2   0 1856.01   47.00
   1   2   0 1772.72   50.39
  -1  -2   0 1861.51   50.39
  -1  -2   0 1894.01   50.39
   1   2   0 1854.31   50.19
   1  -2   0 1912.21   49.90
  -1   2   0 1874.71   50.39
   1   2   0 1911.61   50.29
   2  -2   0  624.04   19.90
   2   2   0  663.73   22.10
  -2  -2   0  681.93   22.30
  -2   2   0  639.84   19.90
   2   2   0  702.13   23.00
  -2  -2   0  647.14   22.30
   2   2   0  648.64   20.80
  -2  -2   0  646.64   22.80
  -2   2   0  643.74   17.50
   2   2   0  657.23   22.30
   2  -2   0  646.04   16.90
  -2  -2   0  642.84   22.00
  -2   2   0  618.94   20.70
  -2  -2   0  634.44   21.20
   3  -2   0   33.40    3.40
  -3  -2   0   46.60    7.60
  -3   2   0   24.20    4.80
   3   2   0   35.30    5.30
   3  -2   0   29.40    4.20
  -3  -2   0   37.00    6.40
  -3   2   0   37.20    4.00
   3   2   0   32.60    6.10
  -3  -2   0   34.90    7.10
   4  -2   0  755.12   22.00
  -4  -2   0  749.42   27.60
  -4   2   0  768.72   27.00
   4   2   0  734.13   21.40
  -4  -2   0  691.73   28.20
   4   2   0  766.72   23.90
   4   2   0  744.43   27.70
  -4   2   0  733.93   22.40
  -5  -2   0   36.00    7.30
  -5   2   0   36.20    4.70
  -5   2   0   38.80    5.30
   5  -2   0   37.70    4.30
   5   2   0   38.00    2.80
  -5  -2   0   49.70    9.70
   5   2   0   29.60    5.10
  -5   2   0   28.10    6.90
   5   2   0   40.60    2.90
  -6   2   0  113.99    9.10
  -6   2   0  130.69    7.60
  -6   2   0  138.19   12.50
  -6  -2   0  119.79   14.90
  -6  -2   0  126.89   12.90
  -7  -2   0   69.79   11.40
  -7   2   0   62.29    8.60
  -7  -2   0   77.09   13.30
  -7   2   0   74.59   12.20
  -8   2   0  254.47   15.20
  -8  -2   0  257.07   20.80
  -8  -2   0  255.17   18.70
  -8   2   0  250.67   19.60
  -9   2   0  183.38   14.40
  -9   2   0  212.08   18.40
   0   3   0   -1.70    3.60
   0   3   0    1.10    2.90
   0  -3   0    1.10    2.90
   0   3   0   -3.30    2.70
   0  -3   0   -0.60    4.10
   0   3   0    2.30    3.40
   0   3   0   -2.70    3.40
   0  -3   0   -1.10    2.70
   0  -3   0   -4.30    3.60
   1  -3   0   87.19    5.10
  -1   3   0   85.29    5.70
  -1  -3   0   98.79    7.80
   1   3   0   83.99    7.70
   1  -3   0   84.39    7.80
  -1  -3   0  110.69    8.30
   1   3   0   79.09    7.30
  -1   3   0   83.39    7.20
   1   3   0   97.79    8.30
  -1   3   0   86.09    7.80
  -1  -3   0   78.69    8.00
  -1  -3   0   96.69    8.10
   1  -3   0   95.09    8.20
  -1  -3   0   81.79    8.10
   1   3   0   89.49    7.80
   2  -3   0    1.30    3.50
  -2   3   0    1.60    1.90
   2   3   0   -4.70    3.60
  -2  -3   0    0.90    4.20
  -2   3   0    0.00    2.70
   2  -3   0    0.00    1.40
   2   3   0   -5.50    3.30
   2  -3   0    2.20    1.50
  -2   3   0    3.20    4.00
  -2  -3   0    0.00    4.30
  -2  -3   0   -1.00    4.10
  -3   3   0   13.30    3.50
   3   3   0    6.90    5.30
  -3   3   0    6.40    3.80
  -3  -3   0   11.60    5.30
   3  -3   0    9.90    4.00
  -3   3   0    7.80    2.10
  -3  -3   0    8.20    5.00
   4   3   0   60.89    9.30
   4  -3   0   75.89    6.80
  -4  -3   0   66.99    9.10
  -4   3   0   79.29    8.30
  -4  -3   0   62.69    9.90
   4  -3   0   71.19    3.80
  -4   3   0   68.49    4.80
   4   3   0   54.79    6.20
   5   3   0  104.29    6.90
   5   3   0   99.09   11.30
  -5   3   0  103.39   10.20
  -5  -3   0  108.39   12.10
  -5   3   0  107.49    6.80
   5  -3   0  101.59    7.50
  -5  -3   0  110.69   11.80
  -6   3   0   91.79    7.50
  -6  -3   0   99.79   14.10
  -6   3   0   84.79   10.90
  -6  -3   0   74.99   11.20
  -7   3   0    0.90    5.20
  -7   3   0    1.10    4.00
  -7  -3   0   -2.60    6.50
  -7  -3   0    1.00    6.60
  -8   3   0   34.30    9.70
  -8  -3   0   35.50   10.10
  -8   3   0   20.20    5.70
  -8  -3   0   30.60   10.50
   0  -4   0   66.39    6.60
   0   4   0   73.69    7.20
   0   4   0   64.19    8.00
   0   4   0   48.30    6.40
   0   4   0   64.79    6.50
   0  -4   0   68.09    8.20
  -1   4   0 3118.19   83.39
  -1  -4   0 3117.49   81.79
   1   4   0 3002.50   83.39
   1   4   0 3041.60   82.09
  -1  -4   0 3126.79   84.09
   1   4   0 3029.60   81.69
  -1   4   0 2979.40   78.59
  -1  -4   0 3006.90   82.09
   1   4   0 3073.09   85.09
   1  -4   0 3082.79   78.29
   1  -4   0 3136.49   83.39
   2   4   0  583.94   23.00
  -2   4   0  551.34   16.90
  -2  -4   0  511.95   21.80
  -2   4   0  544.45   22.00
   2  -4   0  532.45   21.10
   2  -4   0  563.34   15.80
  -2  -4   0  551.94   22.10
  -2  -4   0  564.94   22.30
   2  -4   0  552.54   15.80
   3   4   0  191.48   13.50
   3  -4   0  186.58   11.60
  -3  -4   0  195.38   13.40
  -3   4   0  205.58   13.40
  -3  -4   0  210.18   13.70
  -3   4   0  205.88    7.40
  -3   4   0  215.68   11.90
  -3  -4   0  186.18   13.40
  -4   4   0 1284.67   33.10
   4   4   0 1263.27   43.10
  -4  -4   0 1348.97   44.90
   4  -4   0 1226.68   38.60
  -4   4   0 1290.07   40.50
  -4  -4   0 1236.38   42.70
   5   4   0  117.19   12.50
  -5   4   0  126.39    6.00
  -5  -4   0  130.79   14.00
  -5  -4   0  119.19   12.90
   5  -4   0  112.79    9.30
   5   4   0  106.49    9.00
  -5   4   0  126.49   11.00
  -6  -4   0  173.38   16.10
  -6   4   0  191.48    8.50
  -6   4   0  174.08   14.20
   6   4   0  184.38   15.90
  -6  -4   0  193.38   18.10
  -7   4   0  104.89   12.10
  -7  -4   0  133.49   17.30
  -7  -4   0  123.39   15.50
  -8   4   0   83.59   12.70
   0   5   0    0.60    3.30
   0   5   0   -0.10    3.90
   0   5   0   -1.50    4.30
   0  -5   0   -1.10    3.30
   0  -5   0   -1.90    4.50
   1  -5   0   20.50    6.60
   1   5   0   10.20    5.50
  -1  -5   0    8.70    4.60
   1  -5   0    4.40    3.00
   1   5   0    3.40    4.30
  -1   5   0   10.90    4.70
  -1   5   0    3.60    3.50
  -1   5   0   12.60    5.70
  -1  -5   0    6.70    5.80
   2  -5   0    9.80    6.10
  -2  -5   0   24.50    7.20
  -2   5   0   22.30    4.00
  -2  -5   0   19.90    6.70
   2  -5   0   16.50    2.90
  -2   5   0   32.40    7.80
  -2  -5   0   13.00    6.20
   2   5   0   22.20    6.60
  -3   5   0  105.19    9.30
  -3   5   0  117.09    6.00
  -3   5   0  121.29   11.50
  -3  -5   0  137.09   12.00
  -3  -5   0  120.29   12.30
   3  -5   0  119.59   11.10
   3   5   0  115.89   11.70
  -3  -5   0  123.89   11.90
   4   5   0   99.99   12.00
  -4   5   0  109.19   13.00
  -4   5   0  108.49   10.10
  -4  -5   0  113.89   12.80
  -4  -5   0  119.19   12.50
   4  -5   0  118.79   10.60
   5  -5   0  301.87   15.60
   5   5   0  274.87   19.50
  -5  -5   0  296.47   19.30
  -5   5   0  313.37   17.00
  -5  -5   0  338.87   21.80
   5   5   0  305.67   16.00
  -5   5   0  304.97   19.20
  -6  -5   0  185.18   18.10
  -6  -5   0  147.19   15.00
   6   5   0  141.29   15.00
  -6   5   0  122.89   14.20
  -6   5   0  137.69   12.70
  -7  -5   0   33.80   11.00
  -7  -5   0   16.60    9.60
   7   5   0   27.00    9.70
   0  -6   0  557.74   24.80
   0  -6   0  513.55   20.30
   0   6   0  492.25   23.60
  -1  -6   0   11.00    5.40
  -1   6   0    9.30    6.20
  -1  -6   0    4.90    6.10
   1  -6   0   17.90    6.80
   1   6   0   21.20    7.50
   2  -6   0  177.68   14.30
  -2  -6   0  179.08   14.70
   2   6   0  144.99   13.30
  -2  -6   0  167.18   13.00
  -2  -6   0  156.88   12.70
  -2   6   0  146.29   13.30
   3  -6   0  333.97   18.30
  -3  -6   0  347.17   19.20
  -3   6   0  362.76   16.90
  -3   6   0  355.26   20.00
   3   6   0  308.57   20.00
  -3  -6   0  314.67   19.50
  -3  -6   0  362.06   20.20
  -4  -6   0   91.09   13.30
  -4  -6   0   81.09   11.80
  -4   6   0   57.79   10.60
  -4   6   0   80.79    9.30
   4  -6   0   63.79    9.80
   4   6   0   72.59   11.90
   5   6   0  213.58   15.00
  -5  -6   0  204.68   17.70
  -5   6   0  276.97   19.40
  -5  -6   0  216.18   18.10
   5   6   0  242.68   18.40
   5  -6   0  232.38   15.20
  -6   6   0   26.70    9.10
  -6  -6   0   26.70   10.30
   6   6   0   16.40    8.80
  -6  -6   0   26.90    9.90
  -7  -6   0    8.90   10.20
   0   7   0    3.20    6.20
   0  -7   0   -0.40    6.40
  -1   7   0   25.40    8.10
   1  -7   0   34.30    9.70
   1   7   0   28.40    9.30
  -1  -7   0   24.70    8.40
   2   7   0    4.10    6.60
  -2   7   0    4.00    7.60
  -2  -7   0   18.80    8.20
   2  -7   0    8.50    7.20
  -3  -7   0   56.59   10.20
   3   7   0   61.19   11.50
  -3  -7   0   59.09   10.80
  -3   7   0   69.39   12.00
   3  -7   0   50.09   10.10
  -4  -7   0   61.59   12.00
  -4  -7   0   57.59   10.50
   4   7   0   66.59   12.50
  -4   7   0   59.09   11.30
   4  -7   0   50.19   10.10
   5   7   0    2.00    8.00
  -5  -7   0   13.60    9.00
  -5   7   0   -5.20    6.40
  -5  -7   0    0.30    6.80
  -6   7   0    6.50    9.30
  -6  -7   0    0.70    8.00
  -6  -7   0   19.30   10.20
   0   8   0   22.80    8.30
   0  -8   0    9.30    8.10
  -1  -8   0   27.50    9.50
   1   8   0   15.80    8.80
  -1   8   0   27.40    9.70
   1  -8   0   31.20    9.60
  -2   8   0   38.30   10.30
   2  -8   0   30.80    9.30
  -2  -8   0   32.00   10.30
   2   8   0   38.30   10.60
  -3   8   0  147.19   16.30
   3   8   0   92.79   13.40
   3  -8   0   91.59   13.80
  -4   8   0   15.70    8.90
   4  -8   0   19.50    7.70
   4   8   0   31.30   10.30
   4   8   0   23.30    9.50
   0  -9   0    5.40    8.50
   0   9   0   19.40    9.70
   1  -9   0   24.30   10.20
  -1   9   0   16.40    8.40
   1   9   0   26.40   10.70
  -1  -9   0   23.30    9.80
   2  -9   0    6.50    9.20
  -2   9   0    7.50    8.40
   1   0   1  690.23   18.70
  -1   0   1  691.63   17.90
   1   0  -1  716.03   19.00
   1   0   1  696.23   19.70
  -1   0  -1  730.03   19.20
   1   0   1  699.43   18.70
  -1   0  -1  691.23   18.70
   1   0   1  708.63   17.60
   1   0  -1  636.74   17.90
   2   0   1 1773.12   47.00
  -2   0   1 1795.32   48.60
  -2   0   1 1870.51   47.50
   2   0  -1 1766.52   44.60
  -2   0  -1 1806.22   43.90
   2   0   1 1755.72   48.70
  -2   0  -1 1829.62   48.10
   2   0  -1 1834.62   48.50
  -2   0  -1 1811.42   47.20
   2   0   1 1837.12   44.00
  -2   0  -1 1776.12   47.00
  -2   0  -1 1793.92   48.90
   2   0  -1 1767.12   47.10
  -2   0   1 1792.92   44.60
   3   0   1  110.59    8.90
   3   0   1  110.29    4.10
  -3   0  -1  106.69    7.50
  -3   0  -1  121.19    7.90
  -3   0  -1  117.69    8.50
  -3   0  -1   98.59    8.70
  -3   0   1  112.09    7.50
   3   0  -1  103.89    7.10
  -3   0   1  108.39    4.10
  -3   0   1  105.79    9.10
   3   0  -1  103.79    9.10
   3   0   1  113.49    7.10
  -4   0  -1   65.49    9.40
  -4   0  -1   73.59    7.30
   4   0   1   59.39    3.20
  -4   0   1   64.79    7.00
  -4   0  -1   60.39    7.40
  -4   0   1   72.49    9.10
  -5   0  -1    9.30    4.50
  -5   0  -1    9.60    6.40
  -5   0   1   10.30    5.60
  -5   0  -1    9.60    4.80
  -5   0   1    7.00    4.80
   5   0   1    7.90    1.30
  -6   0   1    1.50    5.10
  -6   0   1   19.50    7.80
  -6   0  -1   -0.80    5.70
  -6   0  -1   10.70    5.60
  -7   0  -1    3.10    5.80
  -7   0  -1    5.20    7.00
  -7   0   1    4.50    6.90
  -7   0   1    8.10    6.10
  -8   0   1   14.70    8.30
  -8   0  -1    6.20    6.90
  -8   0   1   12.60    7.00
  -8   0  -1    8.60    9.10
  -9   0   1   39.60   10.10
  -9   0   1   32.80   11.20
  -9   0  -1   34.00    8.90
  -9   0  -1   28.90   10.70
   0  -1  -1  411.96   12.30
   0   1   1  410.46   12.60
   0  -1   1  402.26   12.10
   0  -1  -1  422.46   11.50
   0  -1  -1  423.86   12.20
   0  -1  -1  444.16   13.00
   0   1  -1  423.66   11.70
   0   1  -1  421.26   12.60
   0   1   1  416.76   12.20
   0   1   1  415.86   11.40
  -1   1   1 2226.88   54.29
  -1  -1  -1 2178.88   56.19
  -1  -1  -1 2210.28   56.09
   1  -1   1 2203.78   54.59
   1   1  -1 2237.18   56.49
  -1   1   1 2115.99   54.49
   1   1  -1 2167.58   55.89
  -1  -1  -1 2215.88   56.19
  -1  -1  -1 2225.78   55.39
  -1  -1  -1 2160.28   56.09
   1   1  -1 2214.98   55.59
   1   1  -1 2184.08   55.89
  -1  -1   1 2114.59   55.89
  -1  -1   1 2176.08   55.89
  -1   1  -1 2150.58   54.59
   1   1   1 2259.97   56.29
   1   1   1 2186.08   56.19
  -1  -1   1 2185.08   56.59
   1  -1  -1 2156.68   54.49
   1   1   1 2181.38   56.19
   1  -1  -1 2132.49   55.19
   1  -1  -1 2172.08   54.19
   1   1   1 2240.68   56.19
   1   1   1 2090.49   55.09
  -2   1   1 3289.77   84.09
  -2  -1  -1 3347.77   84.99
   2  -1   1 3301.97   81.39
   2   1  -1 3253.47   85.09
   2  -1   1 3316.27   81.49
   2   1  -1 3292.37   85.69
  -2  -1  -1 3322.57   84.99
   2   1  -1 3333.87   82.09
   2  -1   1 3382.26   85.09
  -2  -1  -1 3382.36   82.69
  -2   1   1 3295.77   82.49
  -2  -1  -1 3394.16   85.29
   2   1  -1 3303.17   84.79
  -2  -1  -1 3303.77   85.89
   2   1   1 3175.18   84.99
  -2  -1   1 3328.67   85.99
  -2   1  -1 3342.07   81.39
  -2   1  -1 3238.38   84.99
   2   1   1 3358.76   82.69
  -2   1  -1 3290.47   81.59
  -2  -1   1 3170.38   84.79
   2  -1  -1 3366.96   84.19
  -2  -1   1 3207.48   84.99
   2  -1  -1 3278.27   82.29
   2   1   1 3333.27   84.99
   2   1   1 3428.76   85.89
  -3   1   1  499.35   18.90
   3  -1   1  518.85   14.30
   3   1  -1  491.25   22.10
  -3   1   1  517.55   17.10
   3  -1   1  517.05   16.30
   3  -1   1  514.45   19.50
  -3  -1  -1  554.24   19.50
   3   1  -1  514.35   16.60
  -3  -1  -1  498.75   19.00
  -3   1   1  528.65   16.00
   3   1  -1  544.75   21.80
  -3  -1  -1  547.35   22.00
   3   1  -1  531.55   14.70
  -3  -1  -1  495.85   20.50
   3   1   1  500.35   19.50
   3  -1  -1  536.55   16.80
  -3   1  -1  514.25   19.60
   3  -1  -1  527.45   19.20
   3   1   1  500.45   25.30
  -3  -1   1  516.25   20.40
  -3   1  -1  534.45   16.60
  -3  -1   1  507.05   21.40
  -3  -1   1  531.15   19.50
   3   1   1  532.15   14.10
   3   1   1  516.85   15.90
   4   1  -1  392.56   13.80
  -4  -1  -1  352.66   17.90
   4  -1   1  382.96   10.70
  -4  -1  -1  372.36   16.70
  -4   1   1  382.36   15.00
  -4   1   1  380.16   12.40
  -4  -1  -1  400.86   16.90
  -4   1   1  427.76   18.00
  -4  -1   1  379.46   18.50
  -4   1  -1  408.26   18.10
  -4   1  -1  368.76   14.50
  -4   1  -1  373.86   12.20
   4   1   1  370.76   12.70
  -4   1  -1  386.66   14.50
  -4  -1   1  409.96   17.50
  -5   1   1  544.85   16.20
   5   1  -1  566.34   18.30
  -5   1   1  590.84   21.10
  -5  -1  -1  551.74   22.60
  -5   1   1  599.14   24.00
  -5  -1  -1  558.04   25.00
  -5  -1   1  579.54   23.20
  -5  -1   1  570.14   25.00
  -5   1  -1  563.34   20.40
   5  -1  -1  574.64   17.00
   5   1   1  576.24   17.30
  -5   1  -1  535.55   15.50
  -5   1  -1  555.24   15.50
  -5   1  -1  575.74   24.50
  -5   1  -1  549.45   20.30
  -6  -1  -1  386.86   19.40
  -6   1   1  390.86   17.50
  -6   1   1  364.86   20.40
  -6  -1  -1  375.86   21.40
  -6  -1   1  377.56   21.30
  -6   1  -1  349.37   20.00
  -6  -1   1  349.37   18.40
  -6   1  -1  364.76   16.60
  -7  -1  -1  276.77   18.00
  -7  -1  -1  283.77   20.00
  -7   1   1  304.47   16.80
  -7   1   1  337.27   20.90
  -7  -1   1  291.07   20.40
  -7   1  -1  292.27   19.70
  -7   1  -1  306.67   16.10
  -7  -1   1  295.37   17.80
  -8   1   1  272.87   19.90
  -8   1   1  282.87   17.30
  -8  -1  -1  264.57   21.00
  -8  -1  -1  300.07   19.40
  -8   1  -1  303.87   17.50
  -8   1  -1  299.67   21.90
  -8  -1   1  285.67   19.20
  -8  -1   1  282.77   21.60
  -9   1   1   21.10    9.90
  -9   1   1   16.10    7.10
  -9   1  -1   10.50    7.00
  -9   1  -1    8.40    9.20
   0   2  -1  111.69    6.90
   0  -2   1  109.79    7.30
   0  -2   1  103.69    5.80
   0   2  -1  109.19    5.90
   0  -2  -1  100.59    6.50
   0  -2  -1  107.49    6.30
   0  -2  -1  106.59    7.40
   0  -2   1  101.59    6.50
   0  -2  -1   93.29    7.40
   0   2  -1  110.39    6.80
   0   2  -1  101.49    7.10
   0   2   1  101.19    6.20
   0   2   1   94.99    6.50
   0  -2   1  100.69    5.80
   0   2   1   98.49    5.60
   0   2   1   98.99    7.20
   0   2   1   99.09    6.90
  -1  -2  -1 1525.35   41.20
  -1  -2  -1 1480.05   41.20
  -1  -2  -1 1474.05   41.00
  -1   2   1 1494.05   41.40
   1   2  -1 1444.06   40.60
  -1   2   1 1491.35   40.60
   1  -2   1 1524.45   36.90
   1   2  -1 1453.25   40.90
   1   2  -1 1502.65   41.10
  -1  -2  -1 1408.26   40.50
  -1   2   1 1458.75   38.40
   1  -2   1 1430.66   40.30
   1   2  -1 1485.25   41.40
   1  -2   1 1490.35   36.90
  -1  -2  -1 1548.05   41.50
  -1  -2   1 1539.15   41.20
   1   2   1 1477.85   41.00
   1  -2  -1 1501.35   38.30
  -1   2  -1 1492.75   37.30
   1   2   1 1477.85   40.70
  -1   2  -1 1539.95   37.30
  -1  -2   1 1449.46   41.20
  -1  -2   1 1425.76   40.60
  -1   2  -1 1484.25   40.30
   1   2   1 1466.95   41.10
  -1  -2   1 1443.16   40.60
   1   2   1 1588.84   41.90
   1  -2  -1 1428.76   40.50
  -1  -2   1 1522.85   41.80
   1   2   1 1519.85   40.90
  -1   2  -1 1549.05   41.00
  -2  -2  -1 2394.36   66.79
  -2  -2  -1 2525.65   65.09
   2   2  -1 2509.05   66.29
   2   2  -1 2394.46   66.19
  -2  -2  -1 2353.86   66.19
  -2  -2  -1 2483.65   66.49
  -2  -2  -1 2485.25   66.49
  -2   2   1 2506.15   64.29
   2   2  -1 2476.05   65.19
   2   2  -1 2575.34   67.29
   2  -2   1 2405.16   63.69
  -2   2   1 2475.45   62.19
   2   2   1 2526.05   65.09
  -2   2  -1 2509.35   65.69
  -2   2  -1 2464.35   60.39
   2  -2  -1 2423.26   64.29
  -2  -2   1 2416.66   67.19
   2   2   1 2545.45   66.59
  -2  -2   1 2466.95   66.29
  -2  -2   1 2558.24   66.69
   2   2   1 2473.05   66.69
   2  -2  -1 2486.15   61.89
  -2   2  -1 2519.55   63.79
   2   2   1 2510.45   66.79
  -2  -2   1 2452.95   66.39
   2   2   1 2467.45   66.59
  -3  -2  -1  643.44   24.30
   3   2  -1  644.84   21.40
   3   2  -1  649.24   20.20
   3  -2   1  641.94   19.50
   3   2  -1  652.23   23.70
   3  -2   1  662.63   17.50
  -3  -2  -1  665.93   23.90
  -3   2   1  626.24   21.90
  -3  -2  -1  685.53   23.90
  -3   2   1  641.84   19.20
   3  -2  -1  636.14   18.70
  -3  -2   1  592.64   23.90
   3  -2  -1  699.73   22.40
   3   2   1  644.74   21.00
   3  -2  -1  634.64   20.20
  -3   2  -1  638.24   18.10
  -3  -2   1  662.03   23.80
   3   2   1  644.74   24.00
  -3   2  -1  649.64   22.90
   4   2  -1   88.69    5.70
   4  -2   1   86.19    5.30
  -4   2   1   85.79    6.60
  -4   2   1   87.69    8.00
   4  -2   1   84.59    5.50
   4   2  -1   88.09    9.20
  -4  -2  -1   72.99    9.40
   4   2  -1   69.39    6.60
  -4  -2  -1   77.69    8.90
   4   2   1   71.89    8.70
   4  -2  -1   89.49    6.30
   4   2   1   85.59    6.90
  -4   2  -1   93.09    5.90
  -4   2  -1   81.79    8.80
  -4   2  -1   81.99    5.90
  -4  -2   1   73.89    8.80
  -4  -2   1   89.59    9.90
   5  -2   1  176.68    7.00
  -5  -2  -1  152.78   12.40
   5   2  -1  172.18    6.70
  -5   2   1  201.68   12.70
  -5  -2  -1  157.08   14.10
  -5   2   1  179.48   10.10
  -5   2   1  186.68    9.10
  -5   2  -1  184.78   13.30
  -5   2  -1  184.08    9.40
  -5  -2   1  174.68   14.30
  -5   2  -1  172.08    9.40
  -5   2  -1  176.68    9.40
   5  -2  -1  183.88    8.60
   5   2   1  169.48    9.40
   5   2   1  185.08    6.00
  -5  -2   1  163.08   12.50
  -6   2   1  222.78   12.60
  -6   2   1  209.58   15.40
  -6  -2  -1  239.58   17.50
  -6  -2  -1  207.28   15.00
  -6  -2   1  273.07   18.50
  -6   2  -1  232.28   16.30
  -6  -2   1  219.08   15.50
  -6   2  -1  243.88   12.30
  -6   2  -1  232.28   10.50
  -7   2   1  157.38   11.70
  -7  -2  -1  150.88   16.20
  -7  -2  -1  141.29   13.80
  -7   2   1  171.58   15.20
  -7   2  -1  155.38   15.10
  -7   2  -1  172.08   11.30
  -7  -2   1  157.48   15.20
  -7  -2   1  149.09   15.90
  -8   2   1  134.49   12.10
  -8  -2  -1  131.09   16.60
  -8  -2  -1  176.38   16.50
  -8   2   1  159.98   15.40
  -8   2  -1  114.39   14.20
  -8  -2   1  164.58   16.00
  -8   2  -1  162.98   12.30
  -8  -2   1  112.29   15.60
   0   3   1 1187.08   32.80
   0  -3   1 1122.99   34.40
   0  -3  -1 1216.28   35.60
   0  -3  -1 1133.09   33.00
   0  -3   1 1145.29   35.10
   0  -3   1 1122.59   32.50
   0   3   1 1178.98   33.50
   0   3  -1 1201.68   34.30
   0   3  -1 1177.48   33.00
   0   3   1 1183.08   33.40
   0   3  -1 1160.08   34.70
   0  -3  -1 1152.48   35.20
   0  -3  -1 1196.88   33.40
   0   3  -1 1199.58   37.40
   0  -3   1 1178.58   32.80
   0   3   1 1116.39   35.10
  -1  -3  -1  148.09    9.60
  -1  -3  -1  151.08   10.10
  -1   3   1  153.18    7.50
   1   3  -1  140.09    9.10
   1  -3   1  146.19    6.20
  -1  -3  -1  141.89    9.80
  -1  -3  -1  142.39    9.80
  -1   3   1  137.19    9.50
   1  -3   1  167.68    9.40
   1  -3   1  155.18    9.50
   1   3  -1  156.58    9.90
  -1  -3  -1  160.08    9.20
  -1   3   1  147.39    9.10
   1   3  -1  137.79    9.20
  -1   3  -1  136.09    8.80
   1   3   1  142.79    8.90
  -1   3  -1  150.88    9.00
  -1  -3   1  125.19    8.20
   1   3   1  112.49    8.70
   1  -3  -1  123.69    9.40
  -1  -3   1  131.59    8.90
   1  -3  -1  129.99    9.20
  -1  -3   1  128.19    9.40
  -1   3  -1  134.69    6.40
   1  -3  -1  122.29    6.70
   1  -3  -1  133.29    6.80
   1   3   1  126.29   10.10
  -1  -3   1  125.39    9.30
  -1  -3   1  128.79    9.30
  -1   3  -1  134.19    6.60
   1   3   1  153.38    9.00
  -2  -3  -1  833.42   28.70
  -2   3   1  863.01   26.00
   2  -3   1  858.71   27.30
  -2   3   1  821.32   28.70
   2   3  -1  845.12   28.90
  -2   3   1  860.21   24.00
  -2  -3  -1  835.02   28.70
  -2   3   1  925.71   27.80
   2   3  -1  880.51   28.60
  -2  -3  -1  825.82   28.20
   2  -3  -1  840.92   23.40
  -2   3  -1  870.41   22.30
   2   3   1  817.32   28.70
  -2   3  -1  889.61   27.10
   2   3   1  880.71   28.80
  -2  -3   1  825.62   28.30
   2   3   1  884.91   29.10
   2  -3  -1  851.31   27.50
  -2  -3   1  878.61   29.60
   2  -3  -1  903.01   23.50
  -2  -3   1  926.11   28.90
   2   3   1  864.91   28.80
  -2   3  -1  842.72   28.30
  -3  -3  -1  244.18   12.60
  -3   3   1  251.77   11.90
  -3   3   1  236.78    9.20
  -3  -3  -1  244.58   14.40
  -3  -3  -1  209.68   13.40
   3  -3   1  227.58   11.40
   3   3  -1  230.08   13.60
  -3  -3   1  228.78   14.30
   3   3   1  265.67   14.40
   3  -3  -1  237.28   11.70
   3  -3  -1  252.07    8.40
  -3   3  -1  249.38   12.80
  -3   3  -1  246.58   11.20
  -3  -3   1  253.97   14.50
  -3   3  -1  252.07    7.30
   4   3  -1  261.87   12.00
  -4   3   1  239.98   10.20
  -4  -3  -1  268.97   16.10
  -4   3   1  271.87   13.60
   4   3  -1  256.67   15.40
  -4  -3  -1  250.57   15.70
   4  -3   1  257.97   11.60
   4  -3  -1  264.07   12.00
  -4   3  -1  294.97   15.00
  -4  -3   1  269.57   16.30
  -4  -3   1  263.97   16.00
   4   3   1  262.27   15.80
  -4   3  -1  251.77    8.90
  -5   3   1  180.58   12.40
   5   3  -1  185.68    9.30
   5   3  -1  167.08   13.60
  -5  -3  -1  172.98   14.50
   5  -3   1  178.88    8.80
  -5  -3  -1  199.38   15.40
  -5   3   1  178.48    9.30
  -5   3  -1  171.38   12.90
  -5  -3   1  153.48   14.90
   5   3   1  184.58   14.00
  -5   3  -1  162.48    8.00
  -5  -3   1  175.88   13.90
   5  -3  -1  171.48    9.50
  -5   3  -1  177.38    8.10
   5   3   1  158.58    8.60
  -6  -3  -1  501.15   26.50
  -6   3   1  551.04   24.30
  -6   3   1  523.45   19.10
  -6  -3  -1  543.85   25.50
  -6   3  -1  510.05   24.30
  -6   3  -1  540.35   18.30
  -6  -3   1  505.25   26.70
  -6   3  -1  542.05   20.00
  -6  -3   1  572.34   26.40
  -7   3   1   75.99    8.20
  -7   3   1   74.39   11.30
  -7  -3  -1   87.89   14.10
  -7  -3  -1   86.89   12.20
  -7  -3   1   51.49   10.20
  -7  -3   1   93.19   14.00
  -7   3  -1  101.49   11.80
  -7   3  -1   69.09    7.50
  -8   3   1   15.60    5.30
  -8  -3  -1    7.80    8.30
  -8   3   1    7.00    7.40
  -8  -3  -1   27.20   10.40
  -8  -3   1   -8.90    6.20
  -8   3  -1    7.10    7.70
  -8   3  -1    6.20    4.60
  -8  -3   1    7.50    8.40
   0   4   1  787.32   25.20
   0  -4  -1  767.12   25.50
   0   4  -1  776.62   25.00
   0   4  -1  798.62   27.50
   0  -4  -1  802.72   28.20
   0   4   1  806.42   25.60
   0   4   1  810.32   25.90
   0  -4   1  803.92   24.90
   0   4   1  770.12   28.10
   0   4  -1  814.72   26.50
   0  -4   1  770.12   27.70
  -1   4   1  408.06   15.10
  -1   4   1  409.36   18.50
   1   4  -1  395.96   16.90
  -1   4   1  401.66   15.00
   1  -4   1  397.96   17.60
  -1  -4  -1  438.36   17.50
  -1  -4  -1  375.66   17.90
   1   4  -1  374.46   17.60
   1  -4   1  408.46   13.70
  -1  -4  -1  408.16   17.20
  -1   4  -1  401.86   17.80
  -1  -4   1  415.86   18.50
   1  -4  -1  404.86   14.60
   1   4   1  399.56   18.30
   1   4   1  391.26   16.90
  -1  -4   1  421.96   17.80
   1  -4  -1  402.66   18.00
   1   4   1  398.56   16.60
  -1  -4   1  391.66   16.50
   1   4   1  414.96   17.40
  -1   4  -1  435.96   14.40
  -1   4  -1  416.86   14.40
  -2  -4  -1  714.13   26.40
   2   4  -1  686.53   26.40
  -2   4   1  716.83   21.50
   2  -4   1  735.53   18.80
  -2  -4  -1  708.53   26.30
  -2   4   1  738.63   27.20
   2  -4   1  729.33   18.80
   2  -4   1  680.33   25.30
  -2  -4  -1  746.83   26.70
   2  -4  -1  729.03   20.90
  -2   4  -1  708.33   20.20
   2  -4  -1  747.53   20.80
  -2  -4   1  699.43   26.10
  -2  -4   1  731.83   26.80
   2  -4  -1  727.83   26.00
   2   4   1  688.03   26.50
  -2   4  -1  700.63   26.10
   2   4   1  721.33   27.00
  -2  -4   1  731.83   27.40
  -3  -4  -1  150.08   11.70
  -3  -4  -1  128.79   11.30
  -3   4   1  151.58    9.50
  -3   4   1  130.29    6.70
  -3   4   1  142.89   11.60
   3  -4   1  133.19    9.80
   3   4  -1  140.79   11.50
  -3  -4  -1  123.09   11.30
   3  -4  -1  131.19    5.40
   3   4   1  141.99   11.70
  -3  -4   1  158.48   12.40
  -3  -4   1  139.79   12.80
   3  -4  -1  144.49   10.60
   3  -4  -1  134.99    5.50
  -3   4  -1  147.59   11.30
  -3   4  -1  138.99   10.40
  -4  -4  -1  204.48   15.10
  -4   4   1  188.28   12.00
  -4   4   1  221.58    8.60
   4   4  -1  208.68   12.40
   4   4  -1  224.18   15.10
   4  -4   1  208.38   11.70
  -4  -4  -1  241.08   16.30
  -4  -4   1  188.68   14.40
   4   4   1  207.78   14.70
  -4  -4   1  221.28   16.40
   4  -4  -1  193.38   12.00
  -4   4  -1  198.18   13.10
  -5  -4  -1   63.29   10.40
   5   4  -1   53.69    7.30
   5  -4   1   39.60    6.10
  -5  -4  -1   60.89   10.80
  -5   4   1   52.89    7.90
   5   4  -1   61.39   11.20
  -5   4   1   44.50    4.90
  -5   4  -1   56.89    8.80
   5   4   1   46.40    6.70
  -5  -4   1   43.10    9.80
  -5  -4   1   49.99    9.40
  -5   4  -1   41.90    3.30
   5  -4  -1   65.29    7.70
   5   4   1   29.00    8.60
  -5   4  -1   45.80    3.00
  -6   4   1  118.99   11.50
   6   4  -1  127.39   14.50
  -6  -4  -1  120.79   13.70
  -6  -4  -1  157.38   16.40
  -6   4   1  119.09    7.50
  -6   4  -1  141.29   12.70
  -6  -4   1  115.79   14.50
   6   4   1  109.99   14.20
  -6  -4   1  136.09   15.90
  -6   4  -1  120.29    6.00
  -6   4  -1  138.19   11.20
  -7  -4  -1   97.79   13.30
  -7   4   1   84.69   11.00
  -7  -4  -1   69.99   13.40
  -7   4   1   82.69    7.30
  -7  -4   1   89.99   13.30
  -7   4  -1   86.29   12.70
  -7  -4   1   85.59   14.50
  -8   4  -1    0.70    6.50
   0  -5   1   15.00    5.80
   0  -5   1   19.70    4.50
   0  -5  -1   13.80    5.80
   0   5  -1   26.40    7.10
   0   5   1   16.40    6.40
   0   5  -1   17.10    4.50
   0   5   1   10.00    4.10
   0  -5  -1    9.10    4.30
   0   5   1   13.70    4.70
   0   5   1    8.70    4.30
   1   5  -1  305.07   17.10
  -1   5   1  313.97   13.70
   1   5  -1  295.47   14.80
   1  -5   1  315.67   16.70
  -1  -5  -1  302.07   16.90
  -1  -5  -1  308.67   15.60
  -1   5   1  345.57   14.10
   1  -5   1  311.67   12.30
  -1   5   1  324.47   17.70
  -1  -5   1  321.47   17.20
  -1   5  -1  317.57   17.00
   1  -5  -1  305.47   16.90
  -1   5  -1  328.77   13.10
   1   5   1  339.77   16.10
   1   5   1  292.07   16.90
  -1  -5   1  330.27   15.40
   1  -5  -1  298.37   12.80
   1   5   1  303.47   16.00
   2  -5   1   14.10    2.30
  -2  -5  -1   15.50    6.30
  -2  -5  -1   11.30    5.40
  -2   5   1    7.90    5.60
  -2  -5  -1   15.80    6.10
   2   5  -1   12.70    5.80
  -2   5   1   20.60    4.00
   2  -5   1   12.40    6.10
  -2  -5   1    8.30    5.50
   2  -5  -1   13.80    2.90
  -2   5  -1   19.40    6.30
   2  -5  -1   11.30    5.40
  -2  -5   1   -2.40    5.30
   2   5   1   11.40    5.70
  -2  -5   1   23.50    6.50
   3  -5   1  374.26   17.40
  -3   5   1  354.06   12.60
   3   5  -1  352.16   19.20
  -3  -5  -1  328.57   18.30
  -3   5   1  331.57   15.30
  -3   5   1  363.16   19.10
  -3  -5  -1  350.96   18.90
  -3  -5  -1  319.27   18.20
  -3   5  -1  351.66   16.80
  -3  -5   1  348.07   19.30
   3   5   1  319.67   18.70
   3  -5  -1  370.06   17.60
  -3  -5   1  319.37   18.00
  -3   5  -1  348.87   18.70
   4   5  -1  347.67   17.70
  -4   5   1  334.47   16.10
  -4   5   1  326.17   11.20
   4   5  -1  335.57   20.10
  -4   5   1  325.97   19.90
  -4  -5  -1  349.57   19.70
  -4  -5  -1  325.67   19.50
   4  -5   1  338.27   16.70
  -4   5  -1  322.07   19.20
   4   5   1  316.77   19.50
  -4  -5   1  353.66   21.30
   4  -5  -1  343.37   17.10
  -4   5  -1  312.07   16.80
  -4  -5   1  341.47   19.30
  -5  -5  -1  200.08   17.50
  -5   5   1  190.48    7.40
  -5   5   1  186.48   15.70
  -5   5   1  191.58   12.90
   5   5  -1  198.78   12.90
  -5  -5  -1  182.68   15.80
   5  -5   1  185.08   12.10
   5   5  -1  189.78   15.70
  -5  -5   1  192.68   15.60
  -5  -5   1  195.38   17.40
  -5   5  -1  188.48   13.80
   5   5   1  201.78   16.30
  -5   5  -1  166.08   14.70
   5  -5  -1  165.98   12.20
  -6  -5  -1   26.70    9.50
  -6  -5  -1   20.20    8.90
  -6   5   1   33.60    9.60
  -6   5   1   21.40    7.40
   6   5  -1   15.90    8.00
  -6  -5   1   21.00    9.20
  -6  -5   1   27.00    9.70
  -6   5  -1   28.30    7.20
  -6   5  -1   18.40    6.80
   6   5   1   28.90    9.90
  -7  -5  -1  128.39   16.20
  -7  -5  -1  127.29   16.50
   7   5   1  121.69   15.10
  -7  -5   1  110.69   15.80
  -7  -5   1  126.89   15.50
   0   6  -1  254.87   16.10
   0   6   1  290.67   17.40
   0  -6  -1  268.87   17.30
   0  -6  -1  240.68   13.40
   0  -6   1  243.38   17.20
   0  -6   1  274.47   13.40
   0   6   1  282.27   15.20
  -1   6   1    3.30    5.60
   1  -6   1    6.10    5.90
  -1  -6  -1   14.90    7.50
  -1  -6  -1    6.60    5.20
   1   6  -1    2.90    5.70
  -1   6   1   18.30    5.30
   1  -6  -1   10.70    6.90
  -1   6  -1    5.80    5.80
  -1  -6   1    9.80    4.90
  -1  -6   1   10.60    6.50
   1   6   1    0.30    5.50
  -2  -6  -1   92.99   11.10
  -2   6   1   81.59   11.80
  -2  -6  -1  110.89   10.90
  -2   6   1   99.79    8.00
   2  -6   1  112.89   12.30
  -2  -6  -1  104.19   12.20
   2   6  -1   81.59   10.80
  -2   6  -1   97.69   11.00
   2  -6  -1   98.09   12.00
  -2  -6   1  102.19   12.20
  -2  -6   1  129.29   11.70
   2   6   1  108.49   12.10
  -3  -6  -1  304.07   17.70
  -3   6   1  259.87   18.10
   3  -6   1  241.98   16.30
  -3  -6  -1  252.17   17.40
  -3   6   1  268.37   13.90
   3   6  -1  217.28   16.40
  -3   6   1  282.97   11.30
  -3  -6  -1  236.08   17.00
  -3   6  -1  287.27   18.20
  -3  -6   1  261.97   17.50
  -3  -6   1  278.97   17.50
   3   6   1  258.27   17.70
   3  -6  -1  240.38   16.00
   4  -6   1  207.18   14.30
  -4  -6  -1  189.58   16.50
  -4   6   1  186.08    7.80
   4   6  -1  173.38   14.80
  -4   6   1  207.58   16.80
   4   6  -1  195.68   16.10
  -4  -6  -1  190.18   15.70
  -4   6  -1  207.08   13.50
  -4  -6   1  211.68   16.90
  -4  -6   1  220.88   16.20
  -4   6  -1  177.78   14.90
   4   6   1  206.28   16.60
   4  -6  -1  183.38   13.50
  -5   6   1   -3.60    7.00
  -5  -6  -1    1.50    6.60
   5  -6   1    1.30    5.10
  -5  -6  -1    6.40    8.20
   5   6  -1   10.50    8.50
   5   6  -1    0.80    5.30
  -5  -6   1   -0.90    7.60
  -5  -6   1    7.70    6.90
   5  -6  -1    1.50    5.50
   5   6   1  -10.80    6.20
  -5   6  -1    4.80    6.20
  -5   6  -1   -3.30    5.70
   6   6  -1   86.69   14.50
  -6  -6  -1   58.49   11.50
  -6  -6  -1   69.59   13.60
  -6   6   1   58.79   11.80
  -6  -6   1   48.40   11.50
   6   6   1   80.09   13.50
  -6   6  -1   57.19   10.10
  -6  -6   1   82.49   13.40
  -6   6  -1   79.39   13.00
  -7  -6  -1   16.30   14.90
  -7  -6   1   19.90   10.20
  -7   6  -1   18.70    9.70
   0   7   1  214.18   16.50
   0   7  -1  218.68   16.90
   0  -7  -1  210.38   16.50
   0  -7   1  220.78   16.70
  -1  -7  -1   73.99   11.90
   1   7  -1   62.69   10.80
  -1   7   1   68.79   11.70
   1  -7   1   77.69   12.20
  -1   7  -1   76.69   10.80
   1   7   1   77.09   11.50
   1  -7  -1  113.39   13.70
  -1  -7   1   65.49   11.60
  -2  -7  -1  112.69   13.50
  -2   7   1  113.19   13.10
   2   7  -1  102.29   13.50
   2  -7   1  106.59   13.50
  -2  -7   1  120.19   14.00
  -2   7  -1   88.09   13.20
   2   7   1   93.59   13.50
   2  -7  -1  110.99   12.80
   3   7  -1   84.89   13.00
  -3   7   1   60.09   11.20
   3  -7   1   51.49   10.30
  -3  -7  -1   49.70    9.80
  -3  -7  -1   54.89   10.20
  -3  -7  -1   68.19   11.70
   3   7   1   61.89   12.20
   3  -7  -1   67.59   10.80
  -3  -7   1   54.69    9.90
  -3   7  -1   61.79   11.40
  -4   7   1    3.80    7.20
  -4  -7  -1   10.10    7.10
   4  -7   1   19.90    7.70
   4   7  -1   10.50    6.90
  -4  -7  -1    9.10    6.90
   4   7  -1   18.30    8.80
  -4  -7   1   16.40    7.30
   4   7   1   11.00    8.20
  -4  -7   1    6.40    8.30
   4  -7  -1   11.80    7.40
  -4   7  -1   16.00    8.50
  -5   7   1   -0.80    6.60
  -5  -7  -1  -13.00    6.40
   5   7  -1   12.20    8.00
  -5  -7  -1    8.40    8.20
  -5  -7   1    1.70    7.40
   5  -7  -1    2.00    9.40
   5   7   1    3.20    8.20
  -5  -7   1   -0.40    8.10
  -5   7  -1    9.70    8.30
  -6  -7  -1   44.80   11.10
  -6  -7  -1   25.40    9.80
  -6   7  -1   43.60   10.80
  -6   7  -1   36.70   10.20
  -6  -7   1   42.40   12.10
  -6  -7   1   19.10   18.30
   0   8  -1   53.99   11.60
   0  -8  -1   64.79   11.90
   0   8   1   74.69   12.60
   0  -8   1   37.90   10.50
  -1  -8  -1   12.30    8.00
   1   8  -1   14.60    8.70
  -1   8   1    9.40    8.60
   1  -8   1    9.20    8.70
  -1  -8   1   10.10    8.40
   1  -8  -1    0.10    6.90
  -1   8  -1    0.70    7.60
   1   8   1    3.00    6.90
  -2  -8  -1   13.90    8.30
  -2   8   1   12.00    7.90
   2   8  -1   -0.60    7.40
   2  -8   1    0.90    7.40
   2   8   1    0.90    6.50
  -2   8  -1   -4.70    6.60
   2  -8  -1   11.00    7.80
  -3   8   1    9.50    7.90
   3   8  -1   25.70    9.90
   3  -8   1   12.80    8.00
  -3   8  -1   14.00    8.60
   3   8   1   16.80    8.80
   3  -8  -1   17.50    8.20
   4   8  -1    8.80    7.60
   4  -8   1   22.30    8.80
  -4  -8  -1    5.30    6.80
   4   8  -1    3.20    7.10
  -4   8   1   30.20    9.90
   4  -8  -1   20.60    8.00
  -4   8  -1   18.60    9.00
   4   8   1    8.20    9.10
   0   9  -1   47.50   12.00
   0  -9   1   55.49   12.50
   0   9   1   60.99   13.40
   0  -9  -1   45.90   11.70
   1   9  -1   43.50   10.90
   1  -9   1   52.99   12.20
  -1  -9  -1   49.40   13.20
  -1   9   1   45.40   11.30
   1  -9  -1   40.70   10.70
   1   9   1   69.49   13.70
  -1   9  -1   26.20    9.70
   2  -9   1   52.29   12.50
  -2   9   1   40.00   11.80
   2   9  -1   49.20   11.40
   2  -9  -1   37.70   10.50
  -2   9  -1   41.20   10.50
  -1   0  -2 1820.02   45.30
  -1   0   2 1805.82   45.80
  -1   0  -2 1804.22   45.30
  -1   0  -2 1774.52   46.50
  -1   0   2 1822.82   45.20
   1   0  -2 1721.73   45.10
   1   0  -2 1811.42   45.80
  -1   0  -2 1789.72   44.80
   1   0   2 1777.02   46.40
  -1   0   2 1796.12   45.80
   1   0   2 1769.12   45.30
  -1   0  -2 1760.32   45.20
   1   0   2 1783.12   44.80
   1   0   2 1806.42   45.30
   1   0  -2 1759.92   45.70
   2   0   2  498.65   15.40
   2   0   2  487.65   17.30
  -2   0   2  468.25   16.50
   2   0  -2  476.15   14.00
   2   0  -2  464.85   15.60
   2   0   2  480.95   13.30
  -2   0  -2  509.65   16.40
   2   0  -2  499.95   16.80
  -2   0  -2  457.65   15.30
  -2   0  -2  487.75   13.30
  -2   0  -2  491.45   17.40
  -2   0   2  484.65   16.00
  -2   0  -2  481.55   15.50
  -2   0   2  461.95   13.90
   2   0   2  467.95   15.40
  -3   0  -2   37.90    5.40
  -3   0  -2   33.30    5.50
  -3   0   2   31.50    5.10
   3   0  -2   25.00    3.40
  -3   0   2   29.60    3.20
  -3   0  -2   34.50    6.50
   3   0   2   31.50    4.70
   3   0  -2   32.20    5.10
   3   0  -2   23.00    5.20
  -3   0  -2   30.80    2.10
   3   0   2   23.60    5.60
  -3   0   2   25.10    5.20
  -3   0  -2   38.40    5.50
  -4   0   2   14.80    5.20
  -4   0  -2   18.90    4.80
  -4   0   2   23.70    5.40
  -4   0  -2   13.00    5.70
  -4   0  -2   13.40    4.60
  -4   0   2   19.30    2.50
  -5   0   2    9.50    5.20
  -5   0  -2    4.60    5.40
  -5   0  -2    8.60    4.30
  -5   0   2   12.50    6.50
  -5   0  -2   14.20    5.00
  -6   0  -2  235.88   17.00
  -6   0   2  179.48   13.20
  -6   0  -2  186.28   12.70
  -6   0   2  199.18   15.20
  -7   0   2   79.99   12.30
  -7   0  -2   85.69   13.70
  -7   0   2   75.79   10.90
  -7   0  -2   93.99   10.70
  -8   0   2    0.00    6.10
  -8   0  -2  -12.70    5.00
  -8   0   2   -6.60    6.60
  -8   0  -2   -8.80    7.50
  -9   0  -2    4.80    7.20
  -9   0  -2    4.60   10.10
  -9   0   2   12.90    8.60
  -9   0   2   -8.30    7.50
   0  -1  -2 2622.14   66.29
   0   1   2 2650.53   66.29
   0   1   2 2685.83   64.29
   0  -1  -2 2577.94   66.19
   0  -1  -2 2598.34   64.29
   0  -1   2 2630.44   65.09
   0   1   2 2655.43   66.59
   0  -1   2 2689.33   66.79
   0   1  -2 2662.33   66.69
   0   1   2 2619.14   65.99
   0  -1   2 2687.83   65.29
   0   1  -2 2538.55   64.99
   0   1  -2 2642.44   65.29
   0  -1  -2 2582.04   65.89
  -1   1   2 1039.00   26.60
  -1  -1  -2 1019.00   28.70
  -1  -1  -2 1013.90   28.70
   1   1  -2 1033.40   28.20
  -1  -1  -2  988.70   28.80
  -1  -1  -2 1011.80   27.90
  -1   1   2 1028.70   27.60
   1   1  -2 1008.90   28.20
  -1   1   2 1061.79   28.60
  -1  -1  -2  996.80   28.70
   1   1  -2 1048.90   29.50
   1   1  -2 1015.60   28.60
   1  -1   2 1025.90   25.60
  -1   1  -2 1023.20   28.40
  -1  -1   2 1058.09   28.80
  -1  -1   2 1040.60   29.60
   1   1   2 1036.10   29.00
  -1   1  -2 1061.19   25.80
  -1  -1   2  999.20   28.20
   1   1   2  979.90   28.60
   1  -1  -2 1048.40   27.50
   1   1   2 1061.09   28.80
   1  -1  -2 1081.49   26.70
  -1   1  -2 1050.69   27.20
   1   1   2 1099.99   28.10
   1   1   2 1067.39   29.00
   1   1   2 1043.50   27.90
  -1  -1   2 1056.79   28.30
   2   1  -2   55.89    6.10
   2   1  -2   52.99    6.30
  -2   1   2   38.50    4.70
  -2  -1  -2   50.09    4.60
  -2   1   2   49.60    4.60
  -2  -1  -2   45.30    5.80
   2   1  -2   44.70    6.40
   2  -1   2   46.60    3.60
  -2   1   2   39.50    4.80
  -2  -1  -2   38.90    6.10
  -2  -1  -2   49.80    6.10
   2   1  -2   51.69    4.60
  -2  -1  -2   58.09    6.00
   2   1   2   52.39    4.20
  -2  -1   2   45.60    5.70
  -2   1  -2   52.09    3.80
  -2   1  -2   47.60    3.60
   2  -1  -2   61.19    4.80
   2   1   2   45.50    5.50
   2   1   2   46.80    5.90
  -2  -1   2   48.30    6.60
   2  -1  -2   45.90    5.20
  -2   1  -2   50.39    4.80
  -2  -1   2   46.10    4.40
  -2  -1   2   57.99    6.20
   2   1   2   44.20    6.20
   2   1   2   42.30    5.80
  -2   1  -2   50.59    6.20
  -2   1  -2   50.89    3.20
   2   1   2   51.19    4.40
   3  -1   2  326.27   15.00
  -3  -1  -2  304.27   14.50
  -3  -1  -2  359.36   16.80
   3   1  -2  350.26   11.00
  -3   1   2  335.67   11.70
  -3  -1  -2  343.27   14.40
  -3   1   2  327.17   13.70
   3  -1   2  342.47   11.50
  -3   1   2  348.57   12.90
  -3  -1  -2  315.17   15.40
  -3   1  -2  315.57   11.70
   3   1   2  319.67   15.00
  -3  -1   2  321.37   15.40
   3  -1  -2  338.87   12.70
  -3   1  -2  304.87   11.30
   3   1   2  342.27   11.20
  -3   1  -2  336.97   15.50
  -3   1  -2  317.57   11.70
   3  -1  -2  322.07   14.00
   3   1   2  320.27   10.00
  -3  -1   2  336.97   14.60
  -4   1   2   29.00    6.10
   4   1  -2   25.10    3.00
  -4   1   2   30.70    3.90
  -4  -1  -2   29.00    6.80
  -4   1   2   35.80    5.60
  -4  -1  -2   36.20    6.40
  -4  -1  -2   24.90    5.80
  -4  -1   2   39.10    7.40
   4   1   2   29.60    3.80
  -4   1  -2   35.90    6.70
  -4   1  -2   41.50    5.60
  -4  -1   2   38.40    6.70
  -4   1  -2   39.20    5.30
  -4   1  -2   26.60    3.70
  -5   1   2  118.39   10.80
  -5  -1  -2   94.79   11.00
  -5  -1  -2  103.19   10.20
   5   1  -2  102.59    7.10
  -5   1   2  103.69    5.60
  -5   1   2   92.99    8.70
  -5   1  -2   96.59    4.80
  -5   1  -2  100.99   10.60
  -5  -1   2   92.09   11.00
  -5  -1   2   99.09   10.60
   5   1   2  107.69    5.50
  -5   1  -2   98.59    8.20
  -5   1  -2  113.59    8.50
  -6   1   2   35.20    9.00
  -6   1   2   41.30    7.20
  -6  -1  -2   36.30    9.20
  -6  -1  -2   41.80    8.50
  -6   1  -2   37.60    8.70
   6  -1  -2   45.70    4.80
  -6  -1   2   25.70    6.80
  -6   1  -2   30.80    6.30
  -6  -1   2   35.40    9.30
  -7  -1  -2   37.10   10.30
  -7   1   2   55.39    8.70
  -7  -1  -2   50.29    9.60
  -7   1   2   76.09   12.20
  -7   1  -2   32.70    9.80
  -7   1  -2   60.79    8.70
  -7  -1   2   50.19   10.90
  -7  -1   2   44.40    9.00
  -8   1   2   38.90    8.50
  -8  -1  -2   49.00   10.00
  -8  -1  -2   40.50   11.00
  -8   1   2   54.49   11.80
  -8   1  -2   51.49    8.80
  -8   1  -2   64.59   13.10
  -8  -1   2   36.00   10.70
  -8  -1   2   39.30   10.00
  -9   1   2   14.70    7.50
  -9   1   2    2.30    7.80
  -9   1  -2   17.20    9.60
  -9   1  -2    2.40    6.60
   0   2  -2  386.56   13.40
   0  -2  -2  386.96   14.50
   0  -2  -2  382.66   13.20
   0  -2   2  378.46   12.40
   0   2  -2  382.76   13.90
   0  -2  -2  387.26   13.40
   0   2   2  356.06   11.50
   0  -2  -2  388.86   14.40
   0  -2   2  377.26   12.30
   0   2  -2  362.76   12.30
   0   2   2  389.46   13.20
   0  -2   2  363.86   14.00
   0  -2  -2  372.66   11.80
   0  -2   2  359.36   12.90
   0   2   2  355.26   13.80
   0   2   2  398.16   14.60
  -1   2   2  505.35   18.50
  -1   2   2  523.95   16.20
   1   2  -2  533.35   18.60
  -1  -2  -2  512.35   18.10
   1   2  -2  525.75   17.80
  -1  -2  -2  508.65   17.30
  -1  -2  -2  509.65   18.10
   1  -2   2  517.05   17.20
  -1  -2  -2  549.25   18.30
  -1  -2  -2  503.95   18.10
   1   2  -2  510.05   17.80
   1  -2   2  529.05   13.80
  -1   2   2  524.75   17.60
   1   2  -2  515.35   17.70
   1  -2   2  529.45   13.80
   1   2   2  572.14   18.30
  -1  -2   2  553.04   18.00
   1  -2  -2  529.45   16.00
  -1  -2   2  537.25   18.90
  -1  -2   2  529.25   17.70
   1   2   2  551.54   17.50
  -1   2  -2  536.35   14.20
  -1   2  -2  539.65   17.30
   1   2   2  525.15   18.40
   1   2   2  562.84   18.00
   1  -2  -2  527.35   17.80
   1   2   2  542.55   18.60
   2   2  -2  469.25   16.70
   2   2  -2  471.25   18.50
  -2  -2  -2  478.95   16.90
   2   2  -2  497.45   18.00
  -2   2   2  472.95   15.50
   2  -2   2  485.75   15.70
  -2   2   2  482.25   15.10
  -2  -2  -2  492.85   18.20
   2   2  -2  483.45   17.10
  -2  -2  -2  473.45   18.20
  -2  -2  -2  491.65   18.50
  -2  -2  -2  474.35   18.40
   2   2  -2  515.55   18.30
  -2  -2   2  487.75   17.70
   2   2   2  457.35   18.00
  -2   2  -2  473.75   15.50
   2  -2  -2  486.05   14.90
   2   2   2  499.45   18.20
   2   2   2  466.45   16.50
   2   2   2  475.25   18.30
  -2  -2   2  462.05   18.80
   2   2   2  475.05   18.20
  -2  -2   2  473.15   17.90
   2  -2  -2  480.95   16.70
  -3  -2  -2  680.83   24.30
  -3  -2  -2  684.93   21.50
   3   2  -2  660.83   22.00
  -3   2   2  636.94   22.10
   3  -2   2  668.03   19.70
  -3  -2  -2  660.43   24.80
  -3   2   2  664.73   20.40
   3   2  -2  656.43   24.20
  -3  -2  -2  695.53   24.40
   3   2  -2  669.13   20.90
   3  -2  -2  678.33   22.00
  -3   2  -2  658.33   18.20
  -3  -2   2  664.53   25.10
  -3   2  -2  652.03   18.20
   3  -2  -2  666.53   21.30
  -3   2  -2  673.73   19.70
  -3  -2   2  624.64   23.70
   3   2   2  634.44   24.00
   3   2   2  695.93   21.50
   3  -2  -2  678.13   20.00
  -3   2  -2  686.93   24.10
   4  -2   2  731.53   20.50
  -4   2   2  723.93   25.40
  -4   2   2  724.43   23.00
  -4  -2  -2  713.93   26.80
  -4   2   2  720.03   23.20
  -4  -2  -2  744.83   28.20
   4  -2   2  712.43   20.50
   4   2  -2  746.93   21.90
  -4   2  -2  753.02   27.40
   4   2   2  729.93   27.30
  -4   2  -2  730.83   21.40
  -4   2  -2  706.23   23.10
  -4  -2   2  758.02   28.60
   4   2   2  726.23   21.00
  -4  -2   2  648.84   26.10
   4   2   2  758.42   23.00
  -4   2  -2  702.53   21.30
   4  -2  -2  709.43   22.70
   5   2  -2    6.10    2.30
  -5   2   2    5.00    3.20
  -5   2   2   10.40    3.90
  -5  -2  -2    6.80    5.80
  -5  -2  -2    8.10    6.20
  -5   2   2    9.50    4.90
  -5   2  -2    8.60    3.40
  -5   2  -2    1.80    3.30
   5   2   2    4.10    1.60
   5   2   2    5.70    1.60
   5  -2  -2   -0.20    2.80
   5   2   2    8.30    3.40
  -5   2  -2    7.80    5.10
  -5   2  -2   -2.30    2.60
  -5  -2   2   13.10    6.30
  -5  -2   2    7.60    5.80
  -6  -2  -2  200.88   16.40
  -6  -2  -2  172.18   14.80
  -6   2   2  179.88   11.90
  -6   2   2  207.18   15.00
  -6   2  -2  203.88   11.30
  -6  -2   2  202.68   14.90
  -6   2  -2  210.58   11.00
   6  -2  -2  219.08   13.50
  -6   2  -2  190.68   15.50
  -6  -2   2  235.08   17.30
  -7  -2  -2   80.49   11.30
  -7   2   2   82.69    9.20
  -7   2   2   58.09   10.70
  -7  -2  -2   74.09   12.90
  -7  -2   2   73.89   13.10
  -7  -2   2  101.59   13.10
  -7   2  -2   92.59   12.50
  -7   2  -2   60.39    8.50
  -8  -2  -2   71.19   13.60
  -8   2   2   72.09   12.30
  -8   2   2   71.99    9.70
  -8  -2  -2   66.19   12.20
  -8  -2   2   64.19   11.40
  -8   2  -2   75.69   12.60
  -8   2  -2   64.19    9.20
  -8  -2   2   60.39   12.90
   0   3   2   48.50    4.70
   0  -3  -2   49.90    6.90
   0   3   2   55.59    7.20
   0  -3   2   51.89    6.50
   0  -3   2   55.09    5.40
   0   3  -2   47.80    5.40
   0  -3  -2   61.19    6.00
   0   3   2   49.10    6.30
   0   3  -2   48.20    6.40
   0  -3   2   39.50    5.10
   0  -3  -2   43.50    6.60
   0  -3  -2   47.60    5.60
   0   3  -2   56.99    6.20
   0  -3   2   54.49    7.00
  -1  -3  -2  515.45   19.60
  -1   3   2  514.45   16.80
  -1  -3  -2  516.75   19.00
   1  -3   2  520.25   14.90
   1   3  -2  515.55   18.30
  -1   3   2  492.95   19.70
   1  -3   2  501.95   18.60
   1   3  -2  514.45   19.40
   1  -3   2  542.25   18.60
  -1  -3  -2  534.35   18.40
   1  -3   2  523.85   14.80
   1   3  -2  526.15   19.30
  -1  -3   2  482.75   19.30
  -1   3  -2  494.45   18.40
   1  -3  -2  530.55   16.60
  -1  -3   2  512.15   20.00
   1   3   2  498.85   17.80
  -1   3  -2  529.45   15.40
  -1  -3   2  510.55   18.60
  -1  -3   2  503.65   18.40
   1   3   2  509.75   18.80
   1   3   2  476.95   19.80
  -1  -3   2  524.85   20.20
   1  -3  -2  521.35   16.80
   1   3   2  516.65   19.00
  -1   3  -2  483.65   18.40
   1  -3  -2  490.95   19.30
  -2  -3  -2 1454.55   42.10
   2  -3   2 1387.46   40.40
  -2  -3  -2 1433.96   42.30
   2   3  -2 1437.86   42.20
   2   3  -2 1448.96   42.30
  -2  -3  -2 1431.66   43.00
  -2   3   2 1420.36   38.20
  -2   3   2 1313.37   42.50
  -2   3   2 1412.06   38.50
  -2   3  -2 1454.75   40.40
  -2   3  -2 1461.45   41.90
  -2  -3   2 1318.77   41.70
   2   3   2 1433.76   42.00
   2  -3  -2 1401.86   41.30
   2  -3  -2 1406.46   37.60
  -2  -3   2 1473.25   43.90
   2   3   2 1394.96   42.50
   2   3   2 1401.26   42.90
   2   3   2 1434.56   42.40
   3   3  -2   53.99    7.60
  -3  -3  -2   50.19    7.10
  -3   3   2   55.09    4.90
   3  -3   2   63.69    6.10
   3   3  -2   47.60    6.50
  -3  -3  -2   60.79    8.50
  -3   3   2   46.00    5.80
  -3  -3  -2   68.09    8.40
  -3  -3   2   58.79    8.10
  -3   3  -2   56.69    5.50
   3  -3  -2   49.40    4.40
   3  -3  -2   44.70    6.60
   3   3   2   47.80    7.60
   3   3   2   43.70    7.50
  -3   3  -2   52.89    6.60
  -3  -3   2   54.89    8.50
  -4  -3  -2  468.85   21.20
   4   3  -2  460.65   20.90
  -4   3   2  462.75   15.80
   4   3  -2  432.16   17.00
  -4   3   2  452.75   18.50
  -4  -3  -2  442.16   21.50
   4  -3   2  447.46   15.90
  -4  -3   2  456.35   20.80
  -4   3  -2  448.66   12.90
   4  -3  -2  468.95   17.70
  -4   3  -2  445.36   12.90
   4   3   2  441.26   20.90
  -4   3  -2  457.95   20.10
  -4  -3   2  514.85   23.10
   5   3  -2  301.77   12.50
  -5   3   2  265.67   12.50
   5   3  -2  307.97   17.70
  -5  -3  -2  328.07   19.50
  -5  -3  -2  306.27   17.90
  -5   3   2  296.17   15.70
   5  -3   2  307.27   11.60
  -5   3  -2  293.07   10.60
  -5   3  -2  301.27   10.80
  -5   3  -2  289.97   14.30
  -5  -3   2  275.57   17.20
   5   3   2  285.67   17.60
  -5  -3   2  293.37   19.00
  -5   3  -2  308.17   17.30
   5  -3  -2  306.87   13.40
  -6   3   2  312.47   14.20
  -6   3   2  307.77   17.40
  -6  -3  -2  307.97   19.20
  -6  -3  -2  339.97   21.20
  -6   3  -2  317.87   12.70
  -6  -3   2  347.27   20.40
  -6   3  -2  304.37   18.30
  -6  -3   2  314.17   20.60
  -6   3  -2  307.77   14.30
  -7   3   2   17.20    6.90
  -7   3   2    9.00    4.80
  -7  -3  -2    2.10    7.10
  -7  -3  -2   10.10    6.80
  -7   3  -2   18.10    8.20
  -7  -3   2    2.80    7.00
  -7   3  -2   14.40    4.50
  -7  -3   2   12.40    8.60
  -8   3   2   36.30    6.80
  -8   3   2   20.50    8.80
  -8  -3  -2   30.10    9.30
  -8  -3  -2   37.70   11.70
  -8   3  -2   31.60    6.60
  -8  -3   2   43.20   12.90
  -8  -3   2   53.79   10.90
  -8   3  -2   32.10    9.40
   0   4   2  465.45   16.90
   0  -4  -2  498.65   18.30
   0   4  -2  446.06   18.90
   0  -4   2  483.15   20.10
   0  -4   2  494.35   17.20
   0  -4  -2  481.55   20.30
   0   4  -2  502.95   17.60
   0   4   2  499.25   18.50
   0   4   2  484.65   20.30
   1   4  -2  181.38   11.80
  -1   4   2  178.28    8.60
   1  -4   2  172.38    7.80
  -1  -4  -2  176.78   12.00
  -1  -4  -2  182.18   10.60
  -1  -4  -2  165.38   10.80
  -1   4   2  186.08    9.80
   1   4  -2  179.58   10.80
   1  -4   2  154.38   10.90
   1   4   2  207.28   11.30
   1   4   2  172.78   12.00
   1   4   2  167.78   11.00
   1  -4  -2  177.08    9.10
  -1   4  -2  188.28   11.20
  -1  -4   2  183.48   12.80
   1  -4  -2  176.88   11.80
   1   4   2  182.68   10.30
  -1  -4   2  181.68   10.80
  -1   4  -2  172.98    8.20
   2   4  -2  190.38   12.60
  -2  -4  -2  175.08   11.90
  -2   4   2  186.98    9.00
   2  -4   2  195.48   11.50
  -2  -4  -2  181.08   12.10
  -2   4   2  184.68   13.00
  -2  -4  -2  171.98   12.40
  -2  -4   2  238.78   13.40
   2   4   2  190.18   12.90
   2   4   2  189.68   12.80
  -2  -4   2  195.98   13.00
   2  -4  -2  191.98   12.00
  -2   4  -2  196.88   11.70
  -3   4   2  126.39   11.20
  -3   4   2  136.89    8.70
   3   4  -2  116.39   10.70
   3  -4   2  116.39    9.20
  -3  -4  -2  128.89   10.40
  -3  -4  -2  119.69   10.90
  -3   4   2  123.69    7.20
  -3  -4  -2   98.09   10.70
   3   4  -2  137.89   10.70
  -3   4  -2  140.79   10.50
  -3   4  -2  117.19   10.60
   3  -4  -2  133.49   10.40
   3  -4  -2  138.89    6.50
  -3  -4   2  120.19   11.40
  -3  -4   2  148.39   12.40
   3   4   2  119.99   11.20
   4  -4   2   78.79    7.90
  -4   4   2   80.09    6.20
   4   4  -2  101.29   10.80
  -4  -4  -2   57.29    9.70
  -4   4   2   63.99    7.50
  -4  -4  -2   74.49   10.10
  -4  -4  -2   94.79   10.00
   4   4  -2   80.29    8.90
   4   4   2   95.79   11.80
  -4  -4   2   72.59   10.10
   4  -4  -2   74.89    8.50
  -4   4  -2   70.79    9.00
  -4  -4   2   75.69   11.50
   5   4  -2  236.08   17.10
  -5   4   2  220.08   10.20
   5   4  -2  222.98   12.30
  -5  -4  -2  221.58   17.10
   5  -4   2  200.98   10.80
  -5  -4  -2  237.58   17.10
  -5   4   2  247.78   13.80
   5   4   2  212.58   15.80
  -5   4  -2  234.48   15.20
  -5  -4   2  251.57   17.50
  -5   4  -2  244.88   14.20
  -5  -4   2  215.58   18.00
   5  -4  -2  216.98   12.80
  -6  -4  -2   94.29   12.90
  -6   4   2   93.69   10.50
   6   4  -2   84.89   12.00
  -6   4   2   87.99    7.20
  -6  -4  -2   85.79   13.80
   6   4   2   83.89   11.90
  -6  -4   2   59.79   11.10
  -6  -4   2  108.39   15.30
  -6   4  -2   82.79   10.80
  -6   4  -2   75.29    9.40
  -7  -4  -2   32.60   10.40
  -7   4   2   30.30    7.80
  -7  -4  -2   35.10    9.80
  -7   4   2   22.70    5.20
  -7  -4   2   34.10    9.90
  -7  -4   2   17.60    9.20
  -7   4  -2   21.90    7.30
  -8   4  -2   31.10    9.20
   0   5   2   36.60    7.80
   0   5   2   26.50    4.90
   0  -5  -2   35.70    8.10
   0   5  -2   15.90    4.50
   0  -5   2   24.00    6.80
   0  -5   2   19.10    4.40
   0  -5  -2   19.80    5.20
   0   5   2   24.70    5.60
   0   5  -2   20.00    6.00
  -1  -5  -2  161.48   11.40
  -1   5   2  156.68    8.80
  -1  -5  -2  152.88   10.50
   1   5  -2  139.29   11.20
  -1  -5  -2  150.88   12.30
  -1   5   2  143.29   12.10
   1   5  -2  168.48   11.10
  -1   5   2  160.08    9.90
   1  -5   2  144.29   11.70
   1  -5  -2  169.38    9.50
   1   5   2  143.79   11.50
  -1   5  -2  170.38   11.80
   1   5   2  150.08   12.40
  -1   5  -2  154.08    8.50
   1   5   2  152.38   11.10
  -1  -5   2  173.58   13.20
   1  -5  -2  179.98   12.80
  -1  -5   2  154.68   10.80
  -2  -5  -2  100.19   10.20
   2  -5   2   74.19    3.80
   2   5  -2   81.99    9.60
   2  -5   2   84.89    9.90
  -2  -5  -2   79.59    9.40
  -2   5   2   90.79   10.30
   2  -5   2   77.39    3.90
  -2   5   2   90.19    7.30
  -2  -5  -2  100.39   10.70
   2   5   2   73.99    9.80
  -2  -5   2   86.89    9.90
  -2   5  -2   85.09    9.10
  -2  -5   2   78.39   10.50
   2   5   2   82.89    9.70
   2  -5  -2   93.49    9.90
   3   5  -2  160.28   13.30
  -3  -5  -2  180.18   14.10
  -3  -5  -2  199.88   14.30
  -3   5   2  184.68    9.20
  -3   5   2  161.58   13.40
  -3   5   2  197.38   10.70
  -3  -5  -2  196.78   14.50
   3  -5   2  202.78   13.10
  -3  -5   2  190.48   15.30
   3   5   2  189.68   15.00
   3  -5  -2  185.98   13.70
  -3  -5   2  194.28   13.70
  -3   5  -2  176.28   12.90
   4   5  -2   31.40    9.00
  -4   5   2   33.20    6.30
  -4  -5  -2   24.00    7.60
  -4   5   2   31.40    4.20
  -4  -5  -2   13.00    7.10
   4   5  -2   21.10    7.00
  -4   5   2   22.30    8.50
   4  -5   2   27.50    6.40
  -4  -5  -2   15.00    7.40
  -4  -5   2    9.70    6.10
   4   5   2   32.20    8.70
   4  -5  -2   34.10    7.30
  -4   5  -2   15.80    5.90
  -4  -5   2   19.10    7.90
  -4   5  -2   20.10    7.10
  -5   5   2    9.70    5.30
  -5  -5  -2    6.80    7.70
  -5   5   2   14.70    3.30
  -5  -5  -2    1.90    6.40
   5  -5   2   15.10    5.20
  -5   5   2   15.80    8.10
   5   5  -2    2.10    6.40
   5   5  -2   20.50    5.90
  -5   5  -2    7.60    5.90
   5  -5  -2   16.70    5.90
  -5  -5   2   27.80    8.10
  -5   5  -2    5.90    5.80
   5   5   2    8.40    8.10
  -5  -5   2   21.80    9.40
  -6  -5  -2   53.09   11.60
  -6   5   2   61.29   12.90
  -6  -5  -2   48.60   10.70
   6   5  -2   37.70    9.80
  -6  -5   2   51.19   11.60
   6   5   2   52.09   11.40
  -6  -5   2   64.99   11.60
  -6   5  -2   52.49    8.80
  -6   5  -2   45.80    9.70
  -7  -5  -2   11.80    7.80
  -7  -5  -2   10.40    8.30
  -7   5  -2    4.00    6.50
   7   5   2   24.20    9.10
  -7  -5   2    8.60    8.20
  -7  -5   2   15.90    9.30
   0  -6   2  326.27   14.70
   0  -6  -2  327.07   15.80
   0  -6  -2  354.76   19.40
   0   6   2  288.37   16.00
   0   6   2  343.47   19.30
   0   6  -2  333.77   18.20
   0  -6   2  346.57   19.50
   1  -6   2  378.26   19.70
  -1   6   2  367.76   20.80
  -1  -6  -2  388.46   20.50
  -1   6   2  345.37   16.00
  -1  -6  -2  359.86   18.00
   1   6  -2  324.27   19.10
  -1   6  -2  374.76   19.60
   1  -6  -2  393.16   20.70
  -1  -6   2  369.56   17.30
   1   6   2  389.86   18.70
   1   6   2  388.56   20.90
  -1  -6   2  317.77   19.40
  -2   6   2   29.70    8.20
   2  -6   2   35.30    8.60
  -2   6   2   23.90    5.20
   2   6  -2   27.30    7.70
  -2  -6  -2   25.00    6.90
  -2  -6  -2   28.10    8.50
  -2  -6  -2   34.70    7.80
   2   6   2   31.10    8.80
  -2   6  -2   32.10    7.50
  -2  -6   2   38.20    7.20
   2  -6  -2   49.20    9.10
   3   6  -2  149.29   13.70
  -3  -6  -2  195.58   14.80
  -3  -6  -2  184.78   14.80
  -3   6   2  203.58   16.20
  -3  -6  -2  171.88   14.50
   3  -6   2  201.98   14.50
  -3   6   2  195.68   10.90
  -3   6   2  169.38    9.60
   3  -6  -2  172.38   14.50
  -3  -6   2  168.98   15.40
   3   6   2  188.68   15.60
  -3  -6   2  157.28   13.40
  -3   6  -2  180.78   14.70
  -4   6   2   95.59    6.70
   4   6  -2  110.49   12.80
  -4   6   2  118.19   14.20
  -4  -6  -2   98.89   12.20
   4  -6   2  102.09   10.90
   4   6  -2  102.79   12.10
  -4  -6  -2   94.99   12.50
  -4  -6  -2   83.19   12.00
  -4   6  -2  128.79   13.20
  -4  -6   2  102.39   13.10
   4  -6  -2  119.89   12.30
   4   6   2   84.49   12.50
  -4   6  -2   94.29   10.90
  -4  -6   2   87.19   11.90
   5   6  -2  305.47   18.10
  -5  -6  -2  310.37   21.20
   5   6  -2  315.57   20.40
  -5   6   2  324.27   21.40
  -5  -6  -2  288.27   20.40
  -5   6  -2  301.07   18.00
  -5   6  -2  286.67   18.80
   5   6   2  283.37   20.10
  -5  -6   2  296.17   21.10
  -5  -6   2  271.77   19.30
   5  -6  -2  274.37   17.20
  -6  -6  -2    3.20    8.50
  -6  -6  -2   14.80    8.50
  -6   6   2    9.00    8.30
   6   6  -2   24.00    9.20
  -6   6  -2   20.70    8.80
  -6   6  -2   20.80    7.40
  -6  -6   2   24.30    9.80
   6   6   2   17.30    9.60
  -6  -6   2   18.60    8.50
  -7   6  -2   74.79   13.50
   0  -7  -2   55.99   10.90
   0   7   2   66.09   11.10
   0   7   2   52.29    8.70
   0   7  -2   57.99   10.90
   0  -7   2   38.00    9.80
   1  -7   2   80.19   12.40
   1   7  -2   65.89   11.60
  -1   7   2   78.59    9.30
  -1  -7  -2   84.89   12.50
  -1   7   2   80.19   12.80
   1   7   2   86.69   12.20
   1  -7  -2   65.09   11.10
  -1   7  -2   83.39   12.00
  -1  -7   2   63.19   11.40
  -2  -7  -2  147.89   14.60
   2   7  -2  181.38   15.20
  -2   7   2  188.98   11.60
  -2   7   2  174.28   16.30
   2  -7   2  165.28   14.60
  -2  -7  -2  152.28   15.30
  -2   7  -2  178.48   15.60
   2  -7  -2  184.98   15.10
   2   7   2  178.88   16.50
   3  -7   2   56.99   10.10
   3   7  -2   69.09   12.20
  -3   7   2   58.89    7.30
  -3  -7  -2   43.10    9.70
  -3   7   2   37.30    9.80
  -3  -7  -2   58.19   12.00
  -3  -7  -2   44.60    9.70
   3   7  -2   46.60    9.80
  -3  -7   2   46.50    9.30
   3  -7  -2   48.30   10.40
   3   7   2   52.89   11.20
  -3   7  -2   58.59   11.10
  -4   7   2   13.00    9.00
   4   7  -2   22.90    8.40
  -4  -7  -2   30.10    8.90
  -4  -7  -2   12.60    8.10
   4   7  -2   21.70    8.40
   4  -7   2    9.20    7.20
   4  -7  -2   12.50    7.40
   4   7   2   18.00    9.20
  -4  -7   2   18.50    8.30
  -4  -7   2    5.20    7.40
  -4   7  -2   18.00    8.10
  -5   7   2   12.60    8.30
  -5  -7  -2    4.10    6.90
   5   7  -2   22.40   10.10
  -5  -7  -2   -1.90    8.10
   5  -7  -2   13.10    7.20
  -5   7  -2   10.00    6.70
  -5   7  -2   12.30    7.50
   5   7   2   17.20    8.10
  -5  -7   2   14.00    8.80
  -5  -7   2    8.40    7.60
  -6  -7  -2   62.79   12.70
  -6  -7  -2   73.79   13.50
  -6   7  -2   63.39   12.00
  -6   7  -2   71.49   14.40
  -6  -7   2   56.39   11.90
   0  -8  -2   43.40   10.30
   0   8   2   45.20   12.10
   0  -8   2   50.89   11.10
   0   8  -2   50.69   10.50
  -1   8   2  120.09   14.50
   1  -8   2  136.29   15.00
  -1  -8  -2  133.59   15.30
   1   8  -2  125.69   14.10
  -1   8  -2  133.29   14.80
   1  -8  -2  126.99   14.70
   1   8   2  142.19   15.10
   2  -8   2   26.50    9.10
  -2  -8  -2   21.80    9.40
  -2   8   2   26.00    9.00
   2   8  -2   30.50    9.90
   2   8   2   25.60    9.30
   2  -8  -2   27.10    9.20
  -2   8  -2   38.70   10.00
  -3   8   2   79.39   14.20
   3  -8   2   71.59   12.80
  -3  -8  -2   91.79   14.30
   3   8  -2   70.79   12.30
   3   8  -2   71.19   13.10
   3  -8  -2   96.59   14.20
  -3   8  -2  104.99   13.20
   3   8   2  110.39   14.50
   4  -8   2   26.40    8.30
  -4   8   2   21.30    9.70
  -4  -8  -2   21.70    8.90
   4   8  -2   40.70   11.00
   4   8  -2   26.80   10.00
   4  -8  -2   23.50    9.30
  -4   8  -2   27.00    9.20
   4   8   2   47.40   18.20
   0   9  -2    4.40    6.90
   0  -9  -2   -1.70    7.60
   0   9   2    9.70    8.70
   1   9  -2   14.40    8.10
  -1  -9  -2   -0.60   12.20
  -1   9   2   21.40    9.90
   1   9   2   16.90   13.60
   1  -9  -2   -0.70    7.90
  -1   9  -2   12.10    8.70
   2   9  -2   15.00    8.70
   2  -9  -2   26.30    9.60
  -2   9  -2   42.80   10.40
   0   0  -3    2.30    1.90
   0   0   3    0.90    1.10
   0   0   3    3.10    2.20
   0   0   3    4.20    2.00
   0   0  -3    0.60    1.90
   1   0  -3 4053.69  101.59
   1   0  -3 4159.68  101.89
   1   0   3 4140.69  100.79
   1   0   3 4200.78  101.29
   1   0   3 4124.49  101.29
   1   0  -3 3899.61  101.49
  -1   0   3 4184.68  101.69
  -1   0   3 3940.21  101.59
  -1   0  -3 4228.68  101.39
  -1   0  -3 4081.39  101.29
  -1   0  -3 4024.10  102.49
  -1   0  -3 4105.99  100.79
   2   0  -3   40.50    5.90
  -2   0  -3   33.50    2.50
  -2   0  -3   31.50    3.50
  -2   0   3   33.70    4.20
   2   0  -3   25.60    3.70
  -2   0  -3   26.80    4.20
  -2   0  -3   29.90    4.30
  -2   0  -3   22.20    5.10
  -2   0   3   41.90    5.90
  -2   0  -3   36.10    4.70
   2   0  -3   34.90    4.90
   2   0   3   26.30    3.70
   2   0   3   48.30    6.40
   2   0   3   32.50    4.80
   2   0   3   40.90    4.80
  -2   0   3   33.30    4.80
  -3   0  -3  469.95   17.20
   3   0  -3  425.36   18.00
  -3   0   3  429.66   17.30
   3   0  -3  405.06   13.50
   3   0  -3  420.46   17.00
  -3   0  -3  434.36   12.60
  -3   0  -3  433.66   15.80
  -3   0  -3  423.56   18.10
   3   0   3  415.16   15.40
  -3   0  -3  438.66   16.10
  -3   0   3  412.56   13.50
  -3   0   3  437.76   16.50
   3   0   3  434.06   12.70
  -4   0   3   60.29    4.40
  -4   0  -3   61.19    6.80
  -4   0  -3   63.99    7.20
  -4   0   3   61.09    8.00
  -4   0   3   60.89    7.30
  -4   0  -3   66.49    9.10
  -4   0  -3   76.69    3.00
  -5   0   3  871.31   32.50
  -5   0  -3  878.91   29.80
  -5   0   3  895.91   23.60
  -5   0  -3  885.61   33.50
  -5   0  -3  927.01   30.10
  -5   0   3  882.21   30.70
  -6   0  -3  115.89   10.60
  -6   0   3  110.09   12.80
  -6   0  -3  119.09   13.00
  -6   0   3   81.49   10.50
  -7   0   3   15.90    6.70
  -7   0  -3   12.30    8.50
  -7   0  -3   15.60    6.20
  -7   0   3   16.80    8.40
  -8   0   3   -2.40    6.40
  -8   0  -3   -5.40    5.70
  -8   0  -3    6.80    8.00
  -8   0   3    3.40    7.00
  -9   0   3   30.60    9.70
  -9   0  -3   24.80    8.50
   0   1  -3  515.25   13.80
   0  -1  -3  501.45   15.70
   0  -1   3  496.95   14.90
   0   1   3  500.95   15.70
   0  -1  -3  516.15   16.30
   0   1  -3  492.75   14.70
   0  -1  -3  496.35   13.70
   0   1  -3  513.45   16.30
   0  -1   3  515.95   13.80
   0  -1   3  501.45   16.10
   0   1   3  474.65   15.90
   0  -1  -3  545.95   15.70
  -1   1   3  881.41   24.70
  -1  -1  -3  830.12   24.70
   1   1  -3  847.82   25.60
   1   1  -3  836.82   24.40
  -1  -1  -3  845.12   24.10
   1  -1   3  831.32   24.40
  -1  -1  -3  853.41   24.40
   1   1  -3  815.52   24.20
  -1  -1  -3  873.41   23.90
  -1  -1  -3  885.61   24.80
  -1  -1  -3  831.82   24.30
   1   1  -3  769.82   23.40
  -1   1   3  849.32   21.90
  -1   1   3  862.81   24.00
  -1  -1   3  830.42   24.60
   1  -1  -3  857.31   21.90
  -1  -1   3  857.51   24.30
   1  -1  -3  849.91   24.70
   1   1   3  854.71   24.10
  -1   1  -3  858.61   22.10
   1  -1  -3  835.12   23.60
   1   1   3  859.81   24.40
  -1  -1   3  859.71   23.70
  -1   1  -3  875.61   24.60
  -1  -1   3  823.92   25.40
   1   1   3  801.32   24.20
   1   1   3  812.62   24.70
   2   1  -3  850.81   26.20
  -2   1   3  806.92   24.00
  -2   1   3  813.22   23.70
  -2   1   3  841.32   24.10
  -2  -1  -3  837.92   25.50
   2   1  -3  804.02   23.50
   2   1  -3  864.61   25.60
  -2  -1  -3  829.22   23.00
  -2  -1  -3  792.82   25.90
  -2  -1  -3  812.82   25.10
  -2  -1  -3  774.82   25.30
   2   1   3  815.92   25.90
   2   1   3  816.72   22.80
  -2   1  -3  812.82   22.10
   2  -1  -3  797.82   23.80
  -2  -1   3  818.92   23.60
   2   1   3  812.42   25.30
   2  -1  -3  836.52   23.80
  -2   1  -3  821.22   26.20
  -2  -1   3  810.22   26.30
  -2   1  -3  811.02   22.20
  -2   1  -3  814.42   21.70
  -2   1  -3  775.92   23.50
   2   1   3  827.92   23.00
  -2  -1   3  800.62   25.40
   2   1   3  805.62   25.30
  -2  -1   3  854.21   25.20
   2   1   3  819.72   25.30
  -3  -1  -3  155.48    7.00
  -3  -1  -3  168.18   11.60
  -3  -1  -3  155.28   10.10
  -3   1   3  155.88    9.30
  -3   1   3  163.48    8.10
  -3  -1  -3  175.68   11.30
   3  -1   3  157.98    7.50
  -3   1   3  159.18    9.00
  -3  -1  -3  145.69    9.90
   3   1  -3  160.58    7.60
  -3   1  -3  165.68    7.70
   3  -1  -3  150.88    9.30
  -3   1  -3  161.58    7.90
  -3  -1   3  163.88   11.00
   3   1   3  146.79    9.70
   3   1   3  161.78    6.90
   3   1   3  162.38   10.20
  -3   1  -3  146.79    7.40
  -3   1  -3  179.18   11.30
  -3  -1   3  161.88    7.50
  -3  -1   3  145.99    9.90
   3   1   3  167.78    6.80
   3  -1  -3  154.28    8.50
  -4  -1  -3  241.78   13.30
  -4   1   3  246.88   10.10
  -4   1   3  269.77   13.60
  -4  -1  -3  261.87   13.30
  -4   1   3  257.47   12.40
  -4  -1  -3  238.48   14.60
   4   1  -3  250.17    9.20
  -4  -1   3  270.97   15.10
  -4   1  -3  257.67   11.30
  -4  -1   3  228.38   13.10
  -4   1  -3  250.87    9.60
   4   1   3  235.58    8.90
  -4   1  -3  254.77   11.10
  -4   1  -3  262.67   14.90
   4   1   3  246.58    7.70
  -5   1   3   25.00    5.60
  -5   1   3   34.30    7.30
  -5  -1  -3   24.80    7.30
  -5  -1  -3   27.30    7.10
  -5   1   3   28.80    3.80
   5   1  -3   23.30    2.80
   5   1   3   27.70    3.20
  -5  -1   3   33.00    6.70
  -5   1  -3   26.70    3.30
  -5   1  -3   31.40    5.50
  -5   1  -3   25.50    7.30
  -5  -1   3   27.30    7.60
  -5   1  -3   33.00    5.60
  -6   1   3  123.19   10.40
  -6   1   3  111.69   12.30
  -6  -1  -3   96.99   12.60
  -6  -1  -3   86.19   11.00
  -6   1  -3  120.89   13.90
  -6  -1   3   98.49   11.00
  -6   1  -3  118.59    9.50
  -6  -1   3  106.79   12.60
  -7   1   3    7.90    5.90
  -7  -1  -3    3.20    7.10
  -7   1   3    6.50    6.70
  -7  -1  -3    9.00    6.40
  -7   1  -3   20.00    8.30
  -7  -1   3    5.70    6.30
  -7  -1   3   -3.90    7.40
  -7   1  -3   -1.80    4.90
  -8  -1  -3   49.80   10.20
  -8   1   3   75.79   13.80
  -8  -1  -3   68.59   13.50
  -8   1   3   62.09   10.10
  -8   1  -3   53.89    8.90
  -8   1  -3   49.50   12.20
  -8  -1   3   48.10   12.40
  -8  -1   3   50.39   10.10
  -9   1   3   20.10    7.90
  -9   1   3   27.20   11.10
  -9   1  -3    5.70    6.70
  -9   1  -3    9.30   10.30
   0   2  -3  966.80   28.00
   0  -2   3  945.01   26.20
   0  -2   3  951.40   26.60
   0   2   3  920.81   27.40
   0   2   3  952.80   28.60
   0   2   3  939.01   28.00
   0  -2  -3  942.31   28.30
   0  -2  -3  900.71   28.00
   0   2  -3  941.11   26.60
   0   2   3  922.61   24.80
   0  -2  -3  951.70   24.90
   0   2  -3  986.60   29.20
   0  -2  -3  913.11   27.50
   0   2  -3  989.40   26.40
   0  -2  -3  959.70   27.40
   1   2  -3 1106.29   32.40
   1   2  -3 1170.18   33.20
  -1   2   3 1080.69   27.20
  -1  -2  -3 1114.59   31.90
  -1  -2  -3 1092.09   30.80
  -1  -2  -3 1056.49   31.90
  -1   2   3 1144.19   32.70
  -1  -2  -3 1164.78   32.00
  -1  -2  -3 1143.39   32.30
  -1   2   3 1094.19   30.50
   1   2  -3 1123.59   32.10
   1   2  -3 1112.29   31.40
   1  -2   3 1128.79   27.70
   1   2  -3 1024.70   30.80
   1  -2  -3  997.70   31.40
   1   2   3 1069.19   31.60
  -1  -2   3 1079.59   33.00
   1   2   3 1079.49   32.30
  -1   2  -3 1103.79   30.90
  -1   2  -3 1051.59   27.90
   1   2   3 1093.19   30.80
   1   2   3 1112.99   32.10
   1   2   3 1054.59   32.10
  -1   2  -3 1053.39   30.20
   1  -2  -3 1078.69   30.20
  -1   2  -3 1067.29   32.50
  -1  -2   3 1049.70   31.30
  -1  -2   3 1077.59   31.00
  -2   2   3  242.48    9.50
   2   2  -3  269.87   12.20
  -2  -2  -3  246.88   13.30
  -2   2   3  285.77   12.60
   2   2  -3  269.97   11.80
  -2   2   3  256.87   10.50
   2   2  -3  247.58   12.10
   2   2  -3  272.47   13.30
  -2  -2  -3  288.07   13.00
  -2  -2  -3  262.77   12.80
  -2  -2  -3  244.58   11.50
   2   2  -3  258.07   11.90
  -2  -2  -3  259.47   12.60
   2   2   3  275.27   11.50
   2  -2  -3  255.27    9.70
  -2   2  -3  263.87   10.30
  -2  -2   3  283.07   13.90
   2   2   3  266.17   12.60
  -2   2  -3  262.17   11.90
   2   2   3  244.98   12.50
   2   2   3  259.07   11.40
   2  -2  -3  248.98   11.70
   2   2   3  246.18   12.30
  -2  -2   3  252.17   12.40
   2  -2  -3  273.97   10.30
   2   2   3  247.88   12.70
  -2  -2   3  268.87   12.30
  -3  -2  -3    4.90    3.40
  -3   2   3    6.70    3.20
  -3   2   3   10.30    3.70
  -3  -2  -3   12.90    5.40
  -3   2   3    5.20    3.30
  -3  -2  -3    8.70    4.90
   3   2  -3    4.80    4.10
   3   2  -3    6.50    3.20
   3  -2  -3    2.30    3.20
  -3   2  -3    9.40    3.60
   3   2   3   14.40    3.50
  -3   2  -3    6.00    1.70
  -3  -2   3    2.50    4.60
   3   2   3   -0.20    3.10
   3  -2  -3    8.60    3.70
  -3   2  -3    9.70    5.00
  -3  -2   3    6.00    5.40
   3   2   3   11.90    5.00
   3   2   3    5.60    4.70
  -3   2  -3    9.70    2.00
   3  -2  -3    6.90    3.60
  -3   2  -3    6.10    2.20
  -4  -2  -3  103.69   10.40
  -4   2   3  101.89    7.50
  -4   2   3   84.49    7.80
  -4   2   3  102.59    7.40
   4   2  -3   93.29    6.50
  -4  -2  -3   88.79   10.20
  -4  -2   3   88.59    9.40
  -4   2  -3  101.19    5.80
  -4   2  -3   96.09    5.90
   4   2   3  113.19    6.30
   4   2   3   99.59    7.00
   4   2   3   93.19    9.50
  -4   2  -3   93.49    9.40
  -4   2  -3  101.89    7.40
   4  -2  -3  107.59    7.70
  -4  -2   3   96.89   10.40
  -5   2   3  193.38   12.30
  -5  -2  -3  175.58   14.00
  -5  -2  -3  153.08   12.90
  -5   2   3  183.38    9.50
  -5   2   3  178.78   10.50
   5   2  -3  166.58    7.70
   5   2   3  161.18    8.60
   5  -2  -3  160.48    9.50
  -5  -2   3  137.89   12.90
   5   2   3  160.28   12.80
  -5  -2   3  146.69   13.40
   5   2   3  160.88    6.40
  -5   2  -3  154.18    8.70
  -5   2  -3  154.58    8.80
  -5   2  -3  174.48   13.30
  -5   2  -3  157.08    8.70
  -6  -2  -3   60.39   11.10
  -6   2   3   56.89    9.50
  -6   2   3   56.99    7.80
  -6  -2  -3   71.59   10.40
  -6  -2   3   49.60    9.20
  -6   2  -3   52.69    8.10
  -6  -2   3   34.10    9.00
   6  -2  -3   49.10    6.00
  -6   2  -3   41.70    6.00
  -6   2  -3   59.09   10.40
  -7   2   3  111.09   12.70
  -7  -2  -3  105.99   12.50
  -7  -2  -3  124.59   14.60
  -7   2   3   77.79    9.70
  -7  -2   3  100.19   13.40
  -7  -2   3  124.39   15.90
  -7   2  -3  102.29   12.90
  -7   2  -3  101.49    9.40
  -8  -2  -3  181.48   18.30
  -8  -2  -3  203.28   16.60
  -8   2   3  204.38   17.10
  -8   2   3  190.08   14.20
  -8  -2   3  190.48   17.60
  -8  -2   3  201.58   18.70
  -8   2  -3  163.58   16.60
  -8   2  -3  189.68   12.80
   0  -3  -3  174.48   11.90
   0   3   3  147.59    7.10
   0  -3   3  153.48    9.00
   0   3   3  157.88    9.00
   0   3  -3  165.28    9.20
   0  -3  -3  153.18   10.60
   0  -3  -3  140.79    9.00
   0   3  -3  157.58    8.20
   0  -3   3  137.49    7.80
   0  -3  -3  138.19    8.60
   0   3   3  142.09   10.00
   0  -3   3  160.28    7.90
   0  -3  -3  146.09    7.30
   0   3  -3  144.99   10.00
   1   3  -3  854.81   29.50
  -1   3   3  908.11   24.30
   1  -3   3  908.51   28.80
  -1   3   3  862.21   26.80
  -1  -3  -3  917.21   29.10
   1   3  -3  907.71   29.80
   1  -3   3  889.71   24.20
  -1  -3  -3  874.51   27.30
  -1  -3  -3  900.81   29.40
  -1   3   3  902.31   29.90
   1   3  -3  949.60   28.60
   1   3  -3  885.61   28.00
   1  -3   3  916.21   24.40
   1   3   3  924.61   29.40
   1  -3  -3  944.51   27.00
  -1   3  -3  927.71   28.60
  -1  -3   3  923.01   28.20
   1   3   3  940.51   27.50
   1  -3  -3  895.21   29.10
   1   3   3  865.31   28.80
   1   3   3  888.51   29.80
   1  -3  -3  923.41   26.70
  -1   3  -3  914.41   28.00
  -1  -3   3  922.11   28.20
  -1   3  -3  902.31   24.70
  -2  -3  -3  530.45   21.50
   2   3  -3  535.45   20.40
  -2   3   3  528.75   16.60
  -2   3   3  537.05   21.50
  -2  -3  -3  525.05   20.50
   2   3  -3  528.05   20.70
   2  -3   3  558.14   19.60
  -2   3   3  553.74   17.90
  -2  -3  -3  563.94   20.60
   2   3  -3  544.35   20.60
   2   3   3  566.94   20.80
   2  -3  -3  568.84   17.60
  -2   3  -3  579.04   20.30
  -2  -3   3  545.55   20.80
  -2  -3   3  533.25   22.10
   2   3   3  572.64   21.60
   2  -3  -3  525.45   20.20
   2   3   3  537.25   21.40
  -2   3  -3  553.34   19.00
   3   3  -3  565.34   22.50
  -3  -3  -3  548.25   20.90
  -3  -3  -3  568.44   23.00
   3  -3   3  571.84   19.60
  -3   3   3  576.84   18.70
  -3   3   3  549.35   19.00
  -3  -3  -3  590.44   23.20
   3   3  -3  620.64   21.30
  -3  -3   3  569.24   22.80
   3   3   3  542.55   22.80
   3   3   3  604.24   23.40
   3  -3  -3  592.64   21.20
  -3  -3   3  550.44   23.80
  -3   3  -3  567.74   22.40
  -3   3  -3  554.64   19.10
   4  -3   3   93.19    6.50
   4   3  -3   99.79    7.90
   4   3  -3   91.09    9.70
  -4  -3  -3  100.29   10.60
  -4  -3  -3   84.39   10.20
  -4   3   3   87.59    7.50
  -4  -3  -3   73.49    7.90
  -4   3   3   86.69    6.90
  -4   3  -3   96.59    8.70
  -4  -3   3   84.79   10.60
   4   3   3   90.89    7.20
   4  -3  -3   82.39    7.80
  -4   3  -3   95.79    6.10
   4   3   3  101.59   10.40
  -4  -3   3   73.79    9.50
  -4   3  -3   88.29    9.20
  -5   3   3  981.40   32.80
   5   3  -3  976.40   29.60
  -5  -3  -3 1004.20   36.30
  -5  -3  -3  954.40   36.90
  -5   3   3  958.90   29.90
  -5  -3   3  954.10   35.70
   5  -3  -3  946.71   30.50
  -5   3  -3  989.20   26.50
  -5  -3   3  930.51   37.30
  -5   3  -3  968.00   31.50
  -5   3  -3  987.90   35.90
   5   3   3  991.40   36.30
  -5   3  -3  935.21   26.30
  -6  -3  -3  160.88   15.50
  -6   3   3  148.49   12.30
  -6  -3  -3  164.38   14.40
  -6   3   3  140.69   10.30
  -6  -3   3  122.59   13.60
  -6  -3   3  153.58   15.70
  -6   3  -3  172.68   14.60
   6  -3  -3  170.78   14.40
   6   3   3  141.79   13.80
  -6   3  -3  159.18    8.30
  -6   3  -3  174.88   10.50
  -7  -3  -3   37.80    9.00
  -7   3   3   36.50    6.60
  -7   3   3   54.49   10.00
  -7  -3  -3   43.90   11.00
  -7  -3   3   38.60   11.30
  -7  -3   3   44.20   10.30
  -7   3  -3   28.40    9.20
  -7   3  -3   35.50    5.40
  -8   3   3   29.90    6.80
  -8   3   3   27.00    8.40
  -8  -3  -3   44.60   12.70
  -8  -3  -3   30.90    9.10
  -8  -3   3   37.50   10.60
  -8  -3   3   34.00   10.90
  -8   3  -3   13.50    8.30
   0  -4  -3  897.31   28.20
   0   4   3  839.82   28.20
   0   4   3  907.51   30.80
   0  -4   3  855.91   29.90
   0   4  -3  842.32   28.70
   0   4   3  852.31   25.70
   0  -4   3  865.01   26.50
   0   4  -3  888.81   26.90
   0  -4  -3  865.91   30.20
  -1  -4  -3  370.16   15.00
   1   4  -3  352.66   16.30
  -1  -4  -3  346.17   17.00
  -1   4   3  375.36   14.80
  -1  -4  -3  347.07   16.10
   1  -4   3  353.26   16.60
  -1   4   3  345.87   17.10
   1   4  -3  351.76   15.50
   1  -4   3  349.17   12.10
  -1   4   3  357.96   12.30
  -1   4  -3  359.76   15.80
  -1  -4   3  372.16   15.70
   1   4   3  375.26   16.50
   1   4   3  358.66   16.30
   1  -4  -3  355.06   16.80
  -1   4  -3  350.86   12.60
   1   4   3  333.57   17.10
   1  -4  -3  356.86   14.30
   1   4   3  363.26   14.80
   2   4  -3  235.78   14.00
  -2  -4  -3  285.07   15.40
   2   4  -3  246.98   14.20
  -2   4   3  267.47   14.90
  -2   4   3  257.67   10.10
  -2  -4  -3  278.67   14.80
   2  -4   3  255.67   13.10
  -2   4   3  243.38   11.20
  -2  -4  -3  262.27   13.90
   2   4   3  241.08   14.70
  -2   4  -3  224.78   13.00
   2  -4  -3  241.38   10.60
   2  -4  -3  259.87   14.10
  -2  -4   3  243.08   14.00
   2   4   3  241.58   14.20
  -2  -4   3  231.18   14.60
   3  -4   3  509.15   19.60
  -3  -4  -3  522.75   22.40
   3   4  -3  504.75   21.00
   3   4  -3  526.95   22.50
  -3  -4  -3  487.85   20.90
  -3   4   3  498.15   17.20
  -3   4   3  496.25   22.60
  -3   4   3  504.25   17.60
  -3  -4  -3  541.25   22.70
   3   4   3  506.55   22.70
   3  -4  -3  481.35   20.60
   3   4   3  504.85   22.50
  -3  -4   3  508.65   23.30
  -3   4  -3  474.05   20.60
  -3  -4   3  513.05   22.00
  -4   4   3  639.04   22.70
   4   4  -3  657.53   27.00
  -4  -4  -3  617.34   24.40
  -4  -4  -3  634.04   27.30
   4  -4   3  665.33   22.90
  -4   4   3  586.64   26.50
  -4  -4  -3  662.93   27.90
   4   4  -3  669.83   24.30
  -4   4   3  646.54   20.80
  -4  -4   3  620.44   28.00
  -4   4  -3  659.03   25.60
   4  -4  -3  643.44   24.20
   4   4   3  602.24   26.80
  -4   4  -3  651.83   26.00
  -4  -4   3  645.24   26.90
   5   4  -3  193.58   15.60
  -5   4   3  174.58   11.60
  -5  -4  -3  219.48   16.80
   5   4  -3  211.38   12.00
  -5  -4  -3  206.98   16.10
  -5   4   3  195.58   10.10
  -5  -4   3  208.98   16.90
   5   4   3  202.88   15.40
  -5  -4   3  205.88   15.70
  -5   4  -3  202.68   13.10
  -5   4  -3  200.28   14.90
   5  -4  -3  192.98   12.00
  -6  -4  -3  104.19   14.10
  -6   4   3  112.39    8.50
  -6  -4  -3  110.49   13.80
  -6   4   3   99.59   10.50
  -6  -4   3   86.39   13.40
   6   4   3   95.29   12.50
  -6   4  -3  120.49   12.80
  -6   4  -3  106.79   10.50
  -6  -4   3  112.69   13.40
  -7  -4  -3   75.89   13.40
  -7   4   3   96.89    8.40
  -7  -4  -3   91.99   14.20
  -7  -4   3   80.39   14.10
  -7  -4   3   95.29   13.60
  -7   4  -3   88.29   13.10
  -8   4  -3   49.20   10.90
   0   5  -3  360.86   15.20
   0  -5   3  361.46   14.80
   0   5   3  391.06   14.80
   0   5  -3  380.56   17.70
   0  -5  -3  327.47   15.90
   0  -5   3  341.27   18.10
   0   5   3  347.77   18.30
   0   5   3  366.46   16.80
   0  -5  -3  333.47   18.60
   1   5  -3  127.59   11.20
  -1   5   3  135.19    7.80
  -1  -5  -3  145.29    9.80
   1  -5   3  139.19   11.50
  -1  -5  -3  140.99   11.20
  -1   5   3  130.99    9.50
  -1  -5  -3  138.89   12.10
   1   5  -3  131.89   10.10
  -1   5   3  133.19   12.50
  -1   5  -3  138.59    7.90
   1  -5  -3  131.69   11.60
   1   5   3  128.49   11.10
  -1   5  -3  145.69   11.20
   1  -5  -3  135.09    9.30
   1   5   3  138.09   12.10
  -1  -5   3  122.39    9.80
   2  -5   3  286.07   15.80
  -2   5   3  303.67   13.30
  -2   5   3  286.87   11.70
  -2  -5  -3  279.17   15.40
  -2  -5  -3  294.77   16.80
  -2  -5  -3  294.47   16.30
  -2   5   3  304.07   18.00
   2   5  -3  316.57   17.00
   2  -5  -3  308.07   16.80
  -2   5  -3  293.57   15.90
   2  -5  -3  284.27   12.20
  -2  -5   3  291.47   15.70
   2   5   3  277.87   16.30
   2   5   3  287.97   17.20
  -3   5   3  438.56   21.90
  -3  -5  -3  449.46   22.20
   3   5  -3  443.76   21.40
   3   5  -3  439.76   20.90
  -3  -5  -3  436.26   21.30
  -3   5   3  452.35   16.40
  -3  -5  -3  418.76   20.70
   3  -5   3  433.36   19.50
  -3   5   3  441.36   16.20
   3  -5  -3  445.56   20.60
  -3  -5   3  427.96   22.40
   3   5   3  421.46   21.40
  -3   5  -3  453.55   20.70
  -3  -5   3  469.75   21.90
   3   5   3  435.06   22.00
  -4   5   3  100.39   12.30
  -4   5   3  102.69    7.20
  -4   5   3  106.49    8.50
   4  -5   3  107.99   10.20
   4   5  -3  111.29   11.90
  -4  -5  -3   79.49   11.20
  -4  -5  -3   91.49   12.00
  -4  -5  -3  112.59   13.10
   4   5  -3  100.69   11.00
  -4  -5   3   94.29   11.50
  -4   5  -3   95.49   11.00
  -4   5  -3   93.09    9.90
   4  -5  -3  105.49   11.10
  -4  -5   3  100.39   12.70
   4   5   3  109.29   13.20
  -5  -5  -3    8.80    7.10
   5   5  -3    3.70    6.30
  -5   5   3    6.70    7.10
  -5   5   3    8.60    3.30
   5   5  -3    4.10    4.60
  -5  -5  -3   -2.30    6.70
  -5   5  -3   14.90    6.10
   5  -5  -3    3.10    4.90
  -5   5  -3   17.80    7.30
  -5  -5   3    8.50    7.10
  -5  -5   3    4.30    7.30
   5   5   3    5.90    7.30
  -5   5  -3    2.80    5.30
  -6  -5  -3   63.69   12.70
  -6   5   3   56.39   11.50
  -6   5   3   51.59    6.10
  -6  -5  -3   45.00   10.20
   6   5  -3   37.80    9.90
   6   5   3   52.89   11.10
  -6  -5   3   70.69   13.20
  -6  -5   3   69.69   12.30
  -6   5  -3   34.60    9.10
  -6   5  -3   41.60    8.40
  -6   5  -3   59.29   10.10
  -7  -5  -3  144.99   18.10
  -7  -5  -3  129.09   15.50
  -7  -5   3  185.88   19.70
   7   5   3  128.89   15.20
  -7   5  -3  138.69   14.40
  -7  -5   3  134.09   15.90
   0   6   3  523.05   24.20
   0  -6   3  489.95   23.70
   0   6  -3  473.55   22.50
   0   6   3  465.75   20.80
   0  -6  -3  462.15   23.50
   0  -6   3  499.35   23.70
   0  -6  -3  506.25   20.60
   1  -6   3   82.59   11.00
  -1   6   3   99.09    9.40
   1   6  -3  108.39   11.70
  -1  -6  -3  104.19   12.00
  -1  -6  -3  121.89   10.80
  -1   6   3   85.69   11.40
   1   6   3  119.59   11.00
  -1   6  -3   96.79   10.40
   1   6   3  113.39   12.50
   1  -6  -3   95.79   11.60
  -1  -6   3  102.99    9.50
  -2  -6  -3  145.89   12.10
   2  -6   3  151.78   13.70
  -2  -6  -3  173.98   15.30
  -2  -6  -3  168.08   13.60
  -2   6   3  151.68   10.40
   2   6  -3  152.58   13.00
  -2   6   3  160.28   14.10
   2   6   3  145.99   13.00
  -2   6  -3  162.28   13.40
  -2  -6   3  161.08   12.50
   2   6   3  169.08   15.20
  -3  -6  -3   60.69   10.50
  -3  -6  -3   48.10    9.00
   3  -6   3   64.69    9.40
   3   6  -3   54.89    9.90
  -3   6   3   69.59   11.70
   3   6  -3   75.09   10.60
  -3  -6  -3   43.50    8.90
  -3   6   3   54.89    6.80
  -3  -6   3   44.20    8.70
   3  -6  -3   50.59    9.20
   3   6   3   51.09   10.60
  -3   6  -3   59.39   10.10
  -3  -6   3   51.19   11.10
  -4  -6  -3  253.67   17.80
   4   6  -3  226.18   16.30
  -4  -6  -3  221.38   17.00
   4   6  -3  194.78   16.00
  -4   6   3  228.08   17.30
  -4  -6  -3  217.28   17.60
  -4   6   3  229.08   10.70
   4  -6   3  215.78   14.50
  -4  -6   3  216.28   17.00
   4  -6  -3  200.18   15.50
   4   6   3  213.18   17.30
  -4  -6   3  228.18   18.40
  -4   6  -3  197.88   14.20
  -4   6  -3  211.08   16.00
  -5   6   3   17.10    8.60
  -5  -6  -3   15.90    8.70
   5   6  -3   15.20    6.80
   5   6  -3   21.10    8.40
  -5  -6  -3    6.20    7.10
   5   6   3   19.60    8.90
   5  -6  -3   16.00    6.70
  -5   6  -3   11.60    6.90
  -5  -6   3   17.90    7.70
  -5   6  -3   14.30    6.20
  -5   6  -3    1.00    5.80
  -5  -6   3   12.20    8.30
  -6  -6  -3   61.39   13.00
   6   6  -3   70.99   12.70
  -6  -6  -3   66.39   12.40
  -6   6   3   64.69   13.40
   6   6   3   53.09   11.90
  -6  -6   3   68.29   12.80
  -6   6  -3   52.99   11.10
  -6   6  -3   72.29   10.90
  -6   6  -3   65.19   15.90
  -6  -6   3   57.69   12.60
   0  -7  -3   77.49   12.30
   0   7   3   66.79    9.90
   0   7   3   80.79   12.90
   0   7  -3   82.99   12.40
  -1   7   3  678.53   30.70
   1   7  -3  673.83   29.80
  -1   7   3  701.63   26.50
  -1  -7  -3  700.43   30.90
   1  -7   3  674.93   30.00
   1   7   3  685.93   28.70
   1   7   3  687.93   31.40
  -1   7  -3  674.43   29.20
   1  -7  -3  711.73   30.90
   2   7  -3   20.90    9.10
   2   7  -3   11.20    6.70
  -2  -7  -3   19.50    8.20
   2  -7   3   25.90    7.80
  -2  -7  -3   19.70    6.90
  -2   7   3   22.60    8.60
  -2   7   3   10.30    5.30
   2   7   3    8.80    8.20
  -2   7  -3   23.70    7.50
   2  -7  -3   13.10    7.50
   3   7  -3  206.58   16.40
  -3   7   3  235.18   18.00
  -3  -7  -3  243.38   17.80
  -3  -7  -3  274.37   18.30
  -3   7   3  221.68   12.00
  -3  -7  -3  235.38   16.70
   3  -7   3  231.78   17.10
   3   7  -3  214.38   18.00
   3   7   3  256.27   18.70
   3  -7  -3  231.18   17.50
  -3   7  -3  226.58   17.00
  -4  -7  -3    0.70    6.40
  -4  -7  -3    9.40    8.30
   4   7  -3    2.10    6.50
  -4  -7  -3    9.40    7.00
   4   7  -3    2.30    6.60
  -4   7   3   -3.00    7.40
  -4   7  -3   -1.90    6.10
  -4  -7   3   20.80    8.90
  -4  -7   3    8.00    7.20
   4  -7  -3    4.00    7.20
   4   7   3   12.80    9.00
  -4   7  -3   -8.20    6.50
  -5   7   3  116.99   15.00
  -5  -7  -3  132.39   14.70
  -5  -7  -3  159.58   15.90
   5   7  -3  131.99   16.20
  -5  -7   3  146.89   16.60
  -5   7  -3  155.48   15.40
  -5  -7   3  121.09   15.40
   5   7   3  147.49   16.10
  -5   7  -3  120.49   14.40
   5  -7  -3  118.29   13.40
   0   8   3  228.28   18.70
   0   8  -3  223.38   17.70
   0  -8  -3  213.78   17.90
  -1   8   3   38.70    7.90
   1   8  -3   37.60   10.00
   1   8  -3   42.80   11.40
  -1  -8  -3   25.50    9.70
  -1   8   3   57.89   12.50
  -1   8  -3   48.50   10.70
   1   8   3   25.60    9.90
   1  -8  -3   33.10   10.00
  -2   8   3   72.09   12.90
   2   8  -3   80.19   12.50
   2   8  -3   93.39   14.70
  -2  -8  -3   74.99   13.00
  -2   8   3  105.59   10.30
  -2   8  -3   91.89   12.80
   2  -8  -3  103.79   14.60
   2   8   3   90.49   14.00
  -3  -8  -3   13.10    8.90
  -3   8   3   16.40    5.50
   3   8  -3   33.60    9.30
   3   8  -3   26.90    9.70
  -3   8   3   22.00    9.60
  -3   8  -3   24.70    8.80
   3   8   3   18.80    9.40
  -3   8  -3   38.30   11.40
   3  -8  -3   16.30    7.60
   4   8  -3  189.58   17.90
  -4   8   3  216.58   19.90
  -4  -8  -3  191.88   19.10
   4   8  -3  200.78   18.80
  -4   8  -3  215.98   17.20
  -4   8  -3  168.48   17.80
   4  -8  -3  195.68   16.60
   0  -9  -3   25.30   10.20
   0   9  -3   22.20    9.20
   1   9  -3   58.19   12.20
   1  -9  -3   42.80   11.40
  -1   9  -3   47.20   11.40
  -2   9  -3   95.69   13.90
   2  -9  -3   46.50   13.20
   0   0   4 1419.66   36.60
   0   0  -4 1515.75   39.50
   0   0   4 1486.95   39.40
   0   0   4 1451.05   38.70
   0   0  -4 1471.55   38.70
  -1   0  -4 8637.84  206.78
  -1   0   4 8584.14  207.18
   1   0  -4 8397.46  207.08
  -1   0  -4 8473.45  206.38
   1   0  -4 8579.14  207.18
  -1   0  -4 8439.26  207.78
  -1   0   4 8229.38  206.68
   1   0   4 8424.06  206.68
   1   0  -4 8288.57  206.68
  -1   0   4 8513.25  207.08
  -1   0  -4 8554.54  205.28
   1   0   4 8381.36  205.18
   1   0   4 8290.87  206.38
   2   0  -4 1659.53   44.20
  -2   0   4 1665.43   45.50
  -2   0  -4 1657.43   43.40
   2   0  -4 1674.83   45.40
  -2   0   4 1612.94   45.40
  -2   0  -4 1620.94   46.70
   2   0   4 1668.13   44.60
   2   0   4 1679.03   46.60
  -2   0  -4 1650.63   44.30
  -2   0   4 1631.64   44.10
  -2   0  -4 1695.23   44.60
  -2   0  -4 1671.53   44.70
   2   0   4 1663.53   43.50
  -3   0   4  323.27   14.90
  -3   0  -4  319.97   15.80
  -3   0  -4  341.27    9.00
  -3   0  -4  325.07   14.00
   3   0  -4  313.47   14.30
   3   0   4  334.57   11.30
   3   0  -4  335.57   12.30
   3   0   4  324.77   13.30
  -3   0  -4  340.57   13.90
  -3   0  -4  339.77   11.30
  -3   0  -4  335.47   13.40
   3   0   4  343.27   13.60
  -3   0   4  343.07   12.20
  -4   0   4  506.85   21.40
  -4   0  -4  553.84   20.00
  -4   0   4  519.05   16.70
  -4   0  -4  533.75   19.70
  -4   0  -4  528.45   22.90
  -4   0  -4  540.05   15.40
   4   0  -4  545.55   17.00
  -4   0   4  548.45   21.10
  -5   0  -4    8.00    4.40
  -5   0  -4    3.90    5.90
  -5   0   4    9.60    5.10
  -5   0   4   11.00    2.80
  -5   0  -4    4.50    4.80
  -5   0   4   13.80    5.70
  -6   0   4   30.90    7.10
  -6   0  -4   20.30    7.90
  -6   0   4   43.90    9.80
  -6   0  -4   22.40    6.60
  -7   0   4   13.40    8.00
  -7   0   4   19.30    7.30
  -7   0  -4   16.70    8.90
  -7   0  -4   25.30    7.00
  -8   0  -4   11.90    8.70
  -8   0   4   14.10    7.50
  -8   0  -4   17.10    7.40
  -8   0   4    6.50    8.70
  -9   0   4   24.30   10.30
  -9   0  -4   16.80    7.60
   0   1  -4  881.21   24.20
   0  -1  -4  858.51   25.70
   0  -1  -4  869.11   24.90
   0  -1   4  853.11   24.10
   0  -1   4  881.71   22.10
   0  -1  -4  819.32   22.80
   0  -1  -4  853.81   24.40
   0   1  -4  908.11   22.00
   0   1   4  836.32   24.90
   0   1   4  853.11   25.40
   0   1  -4  854.11   25.60
   0   1   4  873.31   24.60
  -1  -1  -4  979.40   28.80
   1   1  -4  957.10   29.10
  -1   1   4 1078.69   29.80
  -1   1   4  962.10   28.70
  -1  -1  -4 1042.40   28.90
   1  -1   4  929.21   26.90
  -1  -1  -4 1084.29   29.70
  -1  -1  -4  977.00   28.30
  -1  -1  -4  954.30   28.90
   1  -1   4  999.90   29.30
   1   1  -4 1006.60   27.80
   1   1  -4  941.71   29.70
  -1   1   4 1055.49   26.60
  -1  -1  -4  968.80   29.40
   1   1  -4 1054.69   29.30
  -1  -1   4 1041.60   29.40
  -1  -1   4 1017.40   27.90
  -1  -1   4 1028.40   30.40
   1   1   4 1021.40   28.90
   1   1   4 1106.39   29.80
   1  -1  -4 1023.10   28.70
  -1  -1   4 1035.20   29.30
   1   1   4 1087.69   29.30
   1  -1  -4 1049.70   29.70
   1   1   4 1023.20   28.90
  -1   1  -4 1048.20   29.60
   1  -1  -4 1077.39   26.50
  -1   1  -4 1044.30   27.20
  -2  -1  -4 1966.60   56.19
   2   1  -4 2000.50   55.49
   2   1  -4 2018.00   56.29
  -2  -1  -4 2029.40   53.09
   2   1  -4 2010.40   54.19
  -2  -1  -4 2156.48   55.49
  -2   1   4 2137.79   54.89
   2  -1   4 2143.19   54.39
  -2   1   4 2072.39   54.69
  -2  -1  -4 2024.20   55.39
  -2  -1  -4 2011.40   55.59
  -2   1   4 2055.79   53.59
  -2  -1  -4 2059.39   53.59
  -2  -1   4 2088.39   56.89
  -2   1  -4 2056.89   52.59
   2   1   4 2062.29   55.39
   2   1   4 2021.20   55.59
  -2   1  -4 1984.60   54.19
   2  -1  -4 2048.40   54.89
   2   1   4 2104.39   56.39
  -2  -1   4 2013.40   54.99
  -2  -1   4 2044.30   55.89
   2  -1  -4 2116.29   53.69
   2  -1  -4 2074.59   54.49
  -2  -1   4 2120.49   54.29
   2   1   4 2079.79   53.69
  -2   1  -4 2070.29   52.49
   2   1   4 2091.29   55.59
  -2   1  -4 2055.39   56.99
   3   1  -4 1923.91   51.19
  -3   1   4 1916.11   52.89
  -3  -1  -4 1938.71   49.90
  -3   1   4 1995.40   51.79
  -3  -1  -4 1968.20   53.99
  -3  -1  -4 1862.81   55.49
  -3  -1  -4 1926.51   54.19
  -3  -1   4 2003.80   51.19
  -3   1  -4 1944.61   50.69
   3  -1  -4 1957.10   52.99
   3   1   4 1950.80   54.09
  -3   1  -4 1966.40   50.99
  -3   1  -4 1932.01   47.70
   3   1   4 1970.00   50.09
  -3   1  -4 1897.21   55.79
   3   1   4 1856.41   53.99
  -3   1  -4 1906.91   51.09
  -3  -1   4 1920.11   55.59
  -3  -1   4 1849.21   54.19
   4   1  -4  142.69    7.20
  -4  -1  -4  113.89   10.80
  -4  -1  -4  110.29   10.00
  -4  -1  -4  143.19   10.30
  -4   1   4  132.69    7.60
  -4   1   4  113.49    9.40
  -4   1   4  119.59    9.10
  -4   1  -4  140.49    8.10
  -4   1  -4  131.59    7.00
  -4   1  -4  131.79    8.30
   4   1   4  122.19    5.70
  -4  -1   4  137.39   10.80
  -4   1  -4  105.39   10.60
  -4  -1   4  120.99    6.90
  -4  -1   4  122.79   10.80
  -5   1   4   74.79    8.60
  -5  -1  -4   72.09    8.80
  -5   1   4   78.89    9.50
   5   1  -4   82.79    5.20
  -5  -1  -4   77.69   10.40
  -5   1   4   84.39    6.20
  -5   1  -4   76.29    7.50
  -5   1  -4   99.39    8.00
  -5   1  -4   87.39   10.50
  -5   1  -4   83.29    5.20
  -5  -1   4   74.99    9.80
  -5  -1   4   83.49   10.50
  -6  -1  -4  117.99   11.20
  -6  -1  -4   90.99   12.40
  -6   1   4  124.59   12.60
  -6   1   4  118.89   11.10
  -6   1  -4  110.29    9.40
  -6  -1   4  110.89   12.10
  -6  -1   4  119.69   13.80
  -6   1  -4   87.69   12.00
  -7  -1  -4  232.48   16.40
  -7  -1  -4  227.78   18.50
  -7   1   4  224.28   17.50
  -7   1   4  213.28   15.00
  -7  -1   4  198.58   15.60
  -7  -1   4  254.87   18.60
  -7   1  -4  269.67   19.90
  -7   1  -4  186.58   13.30
  -8   1   4   24.10    9.30
  -8  -1  -4   25.40   10.00
  -8   1   4   20.80    7.30
  -8  -1  -4   15.70    8.10
  -8   1  -4   12.30    8.60
  -8   1  -4   24.50    6.80
  -8  -1   4    0.00    7.80
  -8  -1   4   41.50   10.00
  -9   1   4   33.10   10.40
  -9   1   4   38.70   10.60
  -9   1  -4   50.09    9.40
   0   2  -4  863.11   28.00
   0  -2   4  919.81   25.20
   0   2   4  904.81   23.70
   0  -2   4  905.41   25.50
   0  -2  -4  909.71   27.60
   0  -2  -4  924.41   27.60
   0  -2  -4  899.31   23.70
   0   2   4  869.11   26.80
   0  -2  -4  939.61   27.10
   0   2  -4  898.91   25.20
   0   2  -4  894.61   25.60
   0   2   4  891.21   27.90
   0   2   4  892.81   27.70
   1   2  -4  536.95   19.60
  -1   2   4  541.25   17.80
  -1   2   4  527.85   19.10
  -1  -2  -4  523.65   19.20
   1   2  -4  488.65   18.60
   1   2  -4  503.95   17.20
  -1  -2  -4  530.45   18.40
  -1   2   4  545.55   19.30
  -1  -2  -4  530.85   17.50
  -1  -2  -4  552.44   18.90
  -1  -2  -4  535.05   18.70
   1   2  -4  547.95   18.40
   1   2   4  555.84   19.10
  -1  -2   4  544.45   17.30
  -1   2  -4  529.15   15.20
  -1   2  -4  542.65   19.40
   1  -2  -4  527.25   18.70
   1   2   4  517.35   17.30
  -1   2  -4  530.95   17.50
  -1  -2   4  535.05   18.40
  -1   2  -4  523.05   16.60
   1  -2  -4  552.04   17.60
   1   2   4  528.45   19.20
   1   2   4  546.65   18.30
   1   2   4  519.05   18.90
  -2  -2  -4  746.63   25.50
  -2  -2  -4  734.53   24.80
  -2   2   4  733.93   20.90
   2   2  -4  796.12   28.70
  -2   2   4  764.52   24.50
   2   2  -4  767.82   25.10
  -2   2   4  748.83   23.10
   2   2  -4  727.63   24.00
   2   2  -4  748.93   24.20
  -2  -2  -4  736.93   24.90
  -2  -2  -4  761.72   25.10
  -2  -2  -4  762.92   23.60
  -2  -2   4  768.12   24.10
  -2   2  -4  728.53   19.50
  -2   2  -4  724.13   22.10
   2   2   4  774.12   25.10
   2  -2  -4  749.73   22.80
   2  -2  -4  734.33   24.30
  -2   2  -4  741.43   24.50
  -2  -2   4  743.83   25.10
   2   2   4  702.43   24.90
   2   2   4  736.63   24.90
   2   2   4  752.92   25.40
  -2  -2   4  785.22   26.80
   2   2   4  739.83   23.40
   2  -2  -4  734.53   21.00
   2   2   4  707.03   23.30
  -3  -2  -4  564.34   19.20
  -3   2   4  579.64   19.30
  -3   2   4  559.74   18.80
  -3   2   4  571.74   20.20
  -3  -2  -4  552.74   22.10
  -3  -2  -4  590.94   22.50
   3   2  -4  569.54   19.50
   3   2  -4  534.95   21.00
   3  -2  -4  557.64   19.90
  -3   2  -4  560.84   17.00
   3   2   4  538.85   21.50
  -3  -2   4  520.65   22.50
  -3   2  -4  554.54   19.70
   3   2   4  567.94   18.70
  -3   2  -4  570.04   15.90
   3   2   4  612.64   19.10
  -3   2  -4  559.24   16.00
   3   2   4  505.95   21.60
   3  -2  -4  562.94   18.90
  -3   2  -4  579.94   22.40
  -3  -2   4  560.74   21.70
  -4  -2  -4   44.50    8.20
  -4   2   4   43.10    5.80
   4   2  -4   52.19    5.70
  -4  -2  -4   37.70    7.10
  -4   2   4   39.20    5.80
  -4   2   4   41.20    6.10
  -4  -2  -4   37.30    5.30
   4   2   4   53.29    8.00
  -4  -2   4   52.29    9.70
  -4   2  -4   44.40    7.80
   4  -2  -4   51.59    6.70
   4   2   4   44.00    4.80
  -4  -2   4   36.90    7.00
  -4   2  -4   48.10    4.70
   4   2   4   35.10    7.00
  -4   2  -4   49.20    6.00
  -4   2  -4   45.50    4.10
   4   2   4   48.70    5.60
   4  -2  -4   45.80    6.30
  -5  -2  -4  139.29   12.80
  -5   2   4  115.59   10.10
  -5   2   4  108.99    9.40
  -5   2   4  118.39    8.40
  -5  -2  -4  118.29   11.30
   5   2  -4  121.79    7.20
   5  -2  -4  134.79    8.90
   5   2   4  115.49    5.90
  -5   2  -4  115.59    7.30
  -5   2  -4  118.69    8.00
  -5   2  -4  107.09   12.00
  -5  -2   4  109.29   11.10
   5   2   4  128.69    7.50
  -5  -2   4  117.29   12.50
   5   2   4  131.09   12.40
  -5   2  -4  124.09    7.70
  -6  -2  -4  110.99   13.20
  -6  -2  -4  105.19   12.10
  -6   2   4  118.49   11.50
  -6   2   4  102.49    9.70
   6  -2  -4  113.49    8.40
  -6   2  -4  109.89    8.50
  -6   2  -4  117.89   12.80
  -6  -2   4  108.49   12.00
  -6  -2   4  123.79   13.80
  -7   2   4  127.69   12.60
  -7   2   4  117.69   11.40
  -7  -2  -4  125.29   14.30
  -7  -2  -4  130.49   15.00
  -7   2  -4  127.39   10.00
  -7   2  -4  159.78   15.20
  -7  -2   4   88.89   13.10
  -7  -2   4  135.09   15.50
  -8  -2  -4   82.79   12.60
  -8   2   4   52.89    9.30
  -8  -2  -4   72.19   13.90
  -8   2   4   67.39   12.00
  -8  -2   4   69.89   13.70
  -8   2  -4   78.69    9.20
  -8  -2   4   98.39   13.20
  -8   2  -4   72.99   13.40
   0   3  -4  682.13   22.00
   0   3  -4  685.13   21.20
   0   3   4  674.03   22.80
   0  -3  -4  668.93   19.60
   0   3   4  653.93   24.00
   0  -3   4  674.03   21.00
   0   3  -4  681.03   24.80
   0  -3   4  697.33   22.00
   0  -3  -4  705.33   23.10
   0  -3  -4  680.23   24.00
   0   3   4  694.93   19.50
   1  -3   4 1512.15   39.10
   1   3  -4 1551.54   43.10
   1  -3   4 1583.84   39.30
   1   3  -4 1553.64   45.10
  -1  -3  -4 1505.85   44.30
  -1   3   4 1458.15   37.50
  -1   3   4 1500.45   44.80
  -1  -3  -4 1531.15   44.20
   1   3  -4 1506.55   42.90
  -1  -3  -4 1489.55   41.80
  -1   3   4 1489.85   42.30
   1   3   4 1518.55   41.80
   1  -3  -4 1500.65   44.20
  -1  -3   4 1586.94   42.90
   1   3   4 1440.46   44.70
   1   3   4 1514.75   44.40
  -1  -3   4 1497.35   42.90
  -1   3  -4 1515.75   42.30
  -1   3  -4 1488.15   39.40
  -1   3  -4 1482.45   45.30
  -2  -3  -4  669.63   25.20
  -2   3   4  718.43   25.80
   2   3  -4  726.43   24.30
  -2   3   4  691.93   22.20
  -2  -3  -4  703.63   24.20
  -2   3   4  701.93   19.30
   2   3  -4  727.33   25.00
  -2  -3  -4  697.63   24.40
   2   3  -4  743.33   24.70
   2   3   4  692.13   25.20
   2   3   4  668.63   24.10
  -2  -3   4  687.93   26.20
  -2   3  -4  673.93   22.60
  -2  -3   4  626.24   23.90
   2   3   4  687.03   25.20
  -2   3  -4  687.13   17.60
  -2   3  -4  684.13   23.10
  -2   3  -4  665.83   25.00
   2  -3  -4  652.73   23.90
  -3   3   4  194.88    9.90
  -3  -3  -4  191.18   11.60
  -3  -3  -4  165.88   12.40
   3   3  -4  200.78   12.40
  -3  -3  -4  191.98   12.50
   3   3  -4  180.48   11.30
  -3   3   4  196.58    9.10
   3   3   4  198.08   13.10
   3   3   4  195.78   10.80
   3   3   4  174.28   12.40
  -3  -3   4  194.48   13.60
  -3   3  -4  204.88    9.70
  -3  -3   4  200.98   12.70
  -3   3  -4  184.58   12.20
   3  -3  -4  195.38   11.60
  -3   3  -4  207.88   12.10
  -4  -3  -4   41.60    8.00
   4   3  -4   35.60    7.30
  -4   3   4   40.30    6.00
  -4  -3  -4   40.20    8.10
   4   3  -4   38.70    6.00
  -4  -3  -4   47.80    6.80
  -4   3   4   45.90    6.10
  -4   3  -4   38.20    4.50
   4   3   4   37.30    5.50
  -4   3  -4   48.00    6.80
   4  -3  -4   34.90    6.20
  -4  -3   4   53.19    9.00
  -4  -3   4   36.60    7.70
   4   3   4   36.20    7.40
  -4   3  -4   57.69    8.80
   4   3   4   45.30    8.20
  -5  -3  -4  376.96   21.50
  -5   3   4  376.66   17.20
   5   3  -4  397.16   15.30
  -5  -3  -4  352.76   19.80
  -5   3   4  354.96   15.70
  -5   3  -4  384.96   16.60
  -5   3  -4  378.66   11.90
  -5   3  -4  402.86   20.50
  -5  -3   4  365.56   20.00
   5   3   4  344.77   19.60
   5  -3  -4  366.26   16.10
  -5  -3   4  364.56   21.40
  -5   3  -4  367.86   11.80
  -6  -3  -4    1.60    6.90
  -6   3   4   11.00    5.00
  -6  -3  -4   13.70    7.50
  -6   3   4   10.40    5.80
  -6  -3   4   10.20    7.70
  -6   3  -4    5.40    4.40
  -6   3  -4   10.10    7.50
   6  -3  -4   14.60    4.80
   6   3   4    7.50    6.70
  -6  -3   4    5.20    6.20
  -6   3  -4   13.50    3.50
  -7  -3  -4   98.39   13.80
  -7   3   4   82.79   10.90
  -7   3   4  105.99   10.20
  -7  -3  -4  110.89   14.60
  -7   3  -4  102.89    7.70
  -7   3  -4   87.49   13.20
  -7  -3   4  107.99   15.20
  -7  -3   4   97.79   13.10
  -8  -3  -4   15.20    8.20
  -8  -3  -4   21.60   10.10
  -8   3   4   11.50    7.60
  -8   3   4   16.30    6.10
  -8   3  -4   27.60   10.00
  -8  -3   4    7.20    9.00
  -8  -3   4   17.60    8.50
   0  -4   4   52.49    5.90
   0   4   4   47.40    5.00
   0   4  -4   47.30    5.60
   0   4  -4   48.60    8.20
   0  -4  -4   63.99    8.20
   0  -4  -4   44.40    6.70
   0   4   4   64.59    8.30
   0   4   4   34.50    6.10
   0   4  -4   45.30    6.50
   1  -4   4   94.39    5.80
  -1   4   4   82.09    4.70
   1   4  -4  105.69    8.10
   1   4  -4   86.79    7.90
  -1   4   4   89.49    9.30
  -1  -4  -4   99.79    7.80
   1   4  -4   93.89    9.80
  -1  -4  -4   84.39    8.80
  -1  -4  -4   96.79    9.70
  -1   4   4   93.49    7.70
   1   4   4   73.99    9.10
  -1   4  -4   87.59    6.00
   1  -4  -4   79.79    7.70
  -1   4  -4   86.19    8.00
   1   4   4   80.99    9.10
  -1  -4   4   87.39    7.60
   1  -4  -4   90.69    9.90
   1   4   4   80.39    7.10
  -2  -4  -4  136.19   10.00
   2   4  -4  125.39    9.80
  -2  -4  -4  127.69   11.00
   2   4  -4  100.89   10.50
  -2   4   4  125.39    8.20
  -2   4   4  133.69    6.10
  -2  -4  -4  116.39   10.30
  -2   4   4  135.89   11.10
  -2   4  -4  123.09   11.10
  -2   4  -4  120.49    5.00
   2   4   4  127.09   10.80
  -2  -4   4  118.79   11.10
   2   4   4  128.69   10.70
  -2  -4   4  120.79   10.20
   2  -4  -4  135.69    8.20
  -2   4  -4  116.89    9.10
   2  -4  -4  127.09   10.90
   3   4  -4  193.98   13.00
  -3   4   4  222.68   10.70
  -3  -4  -4  194.98   14.10
  -3   4   4  195.08   14.00
   3   4  -4  208.88   13.90
  -3  -4  -4  194.58   12.60
  -3  -4  -4  218.28   14.00
  -3   4   4  218.58    9.50
  -3  -4   4  205.68   14.80
   3   4   4  201.08   14.00
  -3   4  -4  224.18   14.20
   3   4   4  200.78   14.10
  -3  -4   4  181.28   13.00
  -3   4  -4  181.98   11.80
   3  -4  -4  198.68   12.60
  -4   4   4  132.09   12.50
  -4  -4  -4  151.28   11.70
   4   4  -4  133.69   10.50
  -4   4   4  149.69    9.20
  -4  -4  -4  156.28   13.60
  -4   4   4  151.48    9.10
  -4  -4  -4  147.99   12.80
   4   4  -4  128.89   12.00
  -4  -4   4  143.49   12.50
   4  -4  -4  149.79   11.30
  -4   4  -4  128.69   11.20
   4   4   4  151.88   13.20
   4   4   4  136.39   12.80
  -4  -4   4  137.39   13.50
  -4   4  -4  146.29   11.90
   5   4  -4  437.46   22.90
  -5   4   4  447.36   19.10
  -5   4   4  474.55   17.90
  -5  -4  -4  475.15   24.50
  -5  -4  -4  493.35   24.20
   5   4  -4  476.65   19.70
   5  -4  -4  505.15   20.70
  -5   4  -4  492.95   23.40
  -5  -4   4  463.25   23.70
  -5  -4   4  547.95   27.10
   5   4   4  483.85   24.00
  -5   4  -4  469.75   21.20
  -6   4   4   53.29    8.30
  -6  -4  -4   34.40    9.40
  -6   4   4   41.80    6.40
  -6  -4  -4   53.49   11.20
  -6  -4   4   27.50    8.70
   6   4   4   45.30   10.20
  -6   4  -4   23.30    6.40
  -6   4  -4   49.20    9.40
  -6  -4   4   45.30   10.70
  -7  -4  -4  105.39   14.70
  -7   4   4  117.09    9.60
  -7  -4  -4  129.09   15.90
  -7   4  -4  111.19   13.60
  -7  -4   4  107.59   15.30
  -7  -4   4  124.09   14.70
  -8   4   4    2.20    7.20
  -8   4  -4   -3.10    6.60
   0   5   4  499.45   20.80
   0   5   4  525.45   23.50
   0   5  -4  476.65   20.70
   0  -5   4  514.85   18.70
   0   5   4  504.95   17.70
   0  -5  -4  530.25   23.10
   0  -5  -4  516.55   20.80
   0   5  -4  542.55   19.50
   1   5  -4   90.99    8.70
  -1  -5  -4   86.19    8.10
   1   5  -4   89.89   10.80
  -1  -5  -4   93.59   10.10
  -1   5   4   85.69    5.80
  -1  -5  -4   94.29   10.70
  -1   5   4   80.69    8.20
  -1   5   4   77.69   10.00
   1   5  -4   87.39    9.10
   1  -5  -4   94.79    8.10
  -1   5  -4   73.09    8.70
  -1   5  -4   87.99    6.50
   1  -5  -4   83.79   10.00
   1   5   4   83.19   10.30
  -1  -5   4   91.49    8.70
   1   5   4   98.09    8.30
   1   5   4   95.29   10.10
  -2   5   4  683.03   22.90
  -2   5   4  633.24   27.20
  -2   5   4  649.83   19.60
  -2  -5  -4  654.43   26.50
  -2  -5  -4  647.64   26.90
   2  -5   4  659.33   25.60
   2   5  -4  653.23   27.20
  -2  -5  -4  618.64   24.50
  -2   5   4  636.54   19.40
   2   5  -4  665.73   26.20
   2   5   4  664.93   27.60
   2  -5  -4  671.23   26.90
  -2   5  -4  662.63   25.30
   2   5   4  650.63   26.90
  -2  -5   4  651.73   25.20
   2  -5  -4  636.54   21.90
   3   5  -4  222.88   15.30
  -3  -5  -4  240.28   15.80
  -3  -5  -4  201.68   14.60
   3   5  -4  235.88   15.10
  -3  -5  -4  248.78   15.90
  -3   5   4  244.38   16.80
  -3   5   4  219.38   11.30
  -3   5   4  221.88    9.90
  -3   5  -4  226.28   14.30
  -3   5  -4  213.48   15.90
   3  -5  -4  219.98   15.00
  -3  -5   4  216.38   14.60
   3   5   4  225.78   15.80
   3   5   4  248.78   16.30
  -3  -5   4  260.47   17.30
   4   5  -4  505.95   22.80
  -4   5   4  539.75   19.00
  -4   5   4  538.35   19.00
  -4   5   4  504.35   25.70
   4   5  -4  502.45   24.40
  -4  -5  -4  513.25   25.20
  -4  -5  -4  525.55   25.40
  -4  -5  -4  562.24   24.30
  -4   5  -4  505.85   24.20
   4   5   4  562.74   26.60
  -4  -5   4  502.05   26.10
  -4   5  -4  536.05   23.50
   4  -5  -4  550.14   23.40
  -4   5  -4  542.45   24.10
  -4  -5   4  508.65   24.30
   5   5  -4   19.70    6.20
  -5  -5  -4   20.20    7.80
   5   5  -4    8.30    6.60
  -5   5   4   19.70    9.30
  -5   5   4   25.30    4.90
  -5  -5  -4   12.80    7.50
  -5  -5  -4   11.90    6.80
  -5  -5   4   11.50    7.30
  -5   5  -4   17.10    6.80
  -5  -5   4   24.80    9.60
  -5   5  -4   15.90    6.70
   5   5   4   26.60    9.10
   5  -5  -4   11.20    5.80
  -5   5  -4   20.20    6.90
   6   5  -4  101.09   13.90
  -6   5   4   83.29    7.70
  -6   5   4  113.29   14.90
  -6  -5  -4   99.99   13.70
  -6  -5  -4   83.19   13.00
   6   5   4  101.79   13.50
  -6  -5   4  108.89   15.00
  -6   5  -4   83.29   12.00
  -6   5  -4   74.09   11.40
  -6  -5   4   83.99   14.70
  -6   5  -4  111.69   11.60
  -7  -5  -4   57.09   12.50
  -7  -5  -4   50.49   12.50
  -7  -5   4   44.40   10.90
  -7  -5   4   41.20   12.10
   7   5   4   24.20    9.40
  -7   5  -4   21.50    7.90
   0   6   4   -4.70    4.50
   0   6  -4    1.80    4.60
   0   6   4    2.00    5.80
   0  -6  -4    0.50    4.40
   0  -6  -4   -3.10    5.60
   1   6  -4  195.98   13.70
  -1   6   4  166.58   14.50
  -1  -6  -4  198.48   15.30
   1   6  -4  171.18   15.20
  -1   6   4  175.68   12.40
  -1  -6  -4  198.88   13.70
   1   6   4  168.98   13.50
   1   6   4  165.78   14.60
  -1   6  -4  153.48   12.60
  -1  -6   4  202.38   12.50
   1  -6  -4  174.88   14.50
  -2  -6  -4  137.19   13.00
  -2   6   4  109.99    9.60
   2   6  -4   67.99   11.10
   2   6  -4  108.39   11.80
  -2  -6  -4  118.49   11.40
  -2  -6  -4  118.19   11.10
  -2   6   4  108.29   12.30
   2   6   4  104.39   12.50
   2   6   4   93.59   12.10
  -2   6  -4  111.79   11.20
   2  -6  -4   91.09   12.40
  -2  -6   4   98.29   10.30
   3   6  -4   37.50    9.10
  -3   6   4   30.20    5.60
   3   6  -4   37.00    8.70
  -3  -6  -4   24.30    7.80
  -3  -6  -4   27.90    7.70
  -3  -6  -4   26.80    8.00
  -3   6   4   27.00    9.10
  -3   6  -4   18.10    7.00
  -3   6  -4   22.00    9.10
   3  -6  -4   19.60    7.60
  -3  -6   4   25.00    7.30
   3   6   4   14.30    7.70
   3   6   4   23.50    7.50
  -4  -6  -4    1.00    6.10
   4   6  -4    5.90    7.10
  -4   6   4    9.60    4.10
  -4  -6  -4   -2.00    6.50
   4   6  -4    8.30    6.60
  -4   6   4   12.50    7.60
  -4  -6  -4   -1.20    6.30
   4  -6  -4    0.30    6.40
  -4   6  -4   11.90    6.50
  -4  -6   4    8.30    6.60
  -4  -6   4   14.20    8.20
  -4   6  -4    2.30    6.30
  -4   6  -4   12.40    6.10
   4   6   4    2.50    6.60
  -5   6   4   -4.20    3.20
  -5  -6  -4    5.80    7.00
  -5  -6  -4   -3.20    5.80
   5   6  -4    3.40    6.60
  -5   6   4    4.40    7.20
   5   6  -4    5.10    5.60
   5  -6  -4   -2.30    5.70
  -5   6  -4    4.10    6.50
  -5  -6   4  -15.20    6.40
   5   6   4    5.50    6.80
  -5  -6   4    8.40    8.00
  -5   6  -4    3.50    5.70
  -5   6  -4    0.10    5.60
  -6   6   4   23.40    9.80
  -6  -6  -4   12.60    7.80
  -6  -6  -4   21.60    8.90
   6   6  -4   16.70    8.90
   6   6   4    7.70    7.70
  -6  -6   4   23.40    8.90
  -6   6  -4   17.40    7.20
  -6   6  -4   10.10    7.00
  -6   6  -4    8.20    7.20
  -6  -6   4   27.10   10.00
   0  -7  -4  231.28   17.30
   0   7  -4  202.78   15.70
   0   7  -4  167.18   16.30
   0   7   4  182.48   14.30
   0   7   4  180.88   16.00
  -1   7   4   20.00    6.30
  -1  -7  -4   17.10    8.10
   1   7  -4   20.10    8.80
  -1   7   4   23.20    9.30
   1   7  -4   16.20    7.80
   1  -7  -4   21.90    8.30
   1   7   4   16.00    6.80
   1   7   4   13.70    7.80
  -1   7  -4   33.40    8.20
  -2  -7  -4   19.20    9.10
   2   7  -4    8.20    7.50
  -2   7   4   27.50    6.30
  -2   7   4   15.50    7.70
   2   7  -4   35.90    8.50
  -2  -7  -4   25.80    7.30
  -2   7  -4   10.60    8.30
   2   7   4   29.70    9.20
   2   7   4   18.60    7.10
   2  -7  -4   25.50    8.30
  -2   7  -4   24.80    7.90
  -3   7   4   11.10    4.90
  -3   7   4   31.70    9.60
   3   7  -4   14.50    7.20
  -3  -7  -4   24.80    8.10
   3   7  -4   17.70    8.00
  -3  -7  -4   36.50    8.80
  -3  -7  -4   22.40    8.60
   3  -7  -4   34.80    8.90
  -3   7  -4   17.80    7.60
   3   7   4   17.20    8.70
  -3   7  -4    8.60    8.50
  -4  -7  -4   29.90    9.80
   4   7  -4   36.80    9.60
  -4   7   4   30.40    5.60
  -4   7   4    5.30    7.60
   4   7  -4   31.70    9.10
  -4  -7  -4   30.30    9.30
  -4  -7  -4   31.70    9.40
  -4   7  -4   24.70    8.20
  -4  -7   4   45.70   10.70
   4  -7  -4   43.40    9.10
  -4   7  -4   38.20    8.70
   4   7   4   31.00    9.70
  -4   7  -4   37.80   10.90
  -5   7   4   32.80   10.10
  -5  -7  -4   41.30   10.10
  -5  -7  -4   44.90   10.60
   5   7  -4   30.80   10.00
  -5  -7   4   39.10   11.60
   5   7   4   33.30   11.40
  -5   7  -4   46.60    9.90
   5  -7  -4   52.19   10.60
  -5   7  -4   35.40    9.60
  -5  -7   4   51.19   11.20
   0  -8  -4   37.60    9.90
   0   8  -4   40.60    9.70
   0   8  -4   33.80   11.00
   0   8   4   31.70    8.00
   0   8   4   30.80   10.00
  -1  -8  -4   28.80    9.50
  -1   8   4   21.20    8.90
   1   8  -4   41.30   12.20
   1   8  -4   16.20    7.90
  -1   8   4   25.50    7.60
  -1   8  -4   31.60    8.50
   1   8   4   32.60    9.30
  -1   8  -4   41.10   12.40
   1   8   4   45.00   10.90
   1  -8  -4   40.60   10.70
  -2  -8  -4   -5.60    6.90
   2   8  -4   -2.90    6.90
   2   8  -4   14.40    7.50
  -2   8   4    5.10    5.60
  -2   8   4    1.60    8.10
   2   8   4    5.50    8.60
  -2   8  -4   16.20    7.90
  -2   8  -4    3.10    8.50
   2  -8  -4    0.20    6.50
  -3   8   4   -3.20    4.80
   3   8  -4   12.10    7.60
   3   8  -4    7.20    7.70
  -3   8   4  -14.80    5.40
  -3  -8  -4   -0.30    7.20
   3   8   4   13.50    8.50
  -3   8  -4    2.00    9.00
   3  -8  -4    7.50    7.50
  -3   8  -4    7.50    7.10
  -4  -8  -4   13.70    9.60
   4   8  -4    8.80    7.90
   4   8  -4   24.00    9.20
  -4   8  -4    4.90    9.20
  -4   8  -4    8.70    6.80
   4  -8  -4   30.40    9.90
   0   9  -4   99.09   13.70
   1   9  -4  133.39   15.40
  -1   9  -4  118.89   15.10
   0   0   5    0.30    1.80
   0   0   5    4.00    3.40
   0   0  -5   -0.30    3.20
   0   0  -5    2.20    3.50
   0   0   5   -1.10    3.30
  -1   0  -5 6961.70  170.38
   1   0  -5 7038.50  171.38
   1   0   5 6781.92  170.78
  -1   0   5 6987.80  171.08
   1   0   5 6955.20  168.48
  -1   0   5 7428.06  171.48
   1   0  -5 6926.21  171.08
   1   0   5 6670.93  170.18
  -1   0  -5 6964.20  168.48
   1   0  -5 6654.03  170.38
  -1   0  -5 6675.13  170.78
  -2   0  -5  153.78   10.20
  -2   0   5  169.68    9.60
   2   0   5  160.18    8.30
  -2   0   5  153.88    9.40
   2   0  -5  158.48    8.90
  -2   0  -5  177.58    8.70
  -2   0  -5  164.88    8.60
   2   0   5  167.58    8.40
   2   0  -5  153.88    9.10
  -2   0   5  166.18    8.80
  -2   0  -5  170.68    8.20
   2   0  -5  167.68    9.20
  -2   0  -5  170.98    8.20
   2   0   5  172.18    8.90
   3   0   5 1769.52   46.90
  -3   0  -5 1713.63   51.99
  -3   0   5 1834.62   50.99
  -3   0  -5 1743.23   48.60
   3   0  -5 1760.12   50.29
  -3   0   5 1760.82   47.90
  -3   0  -5 1765.12   46.90
  -3   0  -5 1782.72   44.60
   3   0   5 1764.62   48.90
  -3   0  -5 1847.02   49.60
   3   0  -5 1769.02   48.00
  -3   0  -5 1807.32   49.30
  -4   0  -5   59.09    8.80
   4   0   5   62.69    4.70
  -4   0  -5   59.29    6.60
  -4   0  -5   65.59    7.60
   4   0   5   53.19    6.80
  -4   0   5   55.99    8.00
  -4   0  -5   49.80    4.30
  -4   0   5   54.39    5.30
  -4   0   5   54.09    7.70
   4   0  -5   44.20    5.50
  -5   0   5  730.13   28.80
  -5   0   5  761.62   27.60
  -5   0  -5  716.43   30.30
  -5   0  -5  756.02   20.10
  -5   0  -5  733.13   26.10
  -5   0   5  752.92   22.50
  -5   0  -5  732.53   26.50
  -6   0   5  710.43   27.60
  -6   0   5  685.53   29.30
  -6   0  -5  664.93   30.20
  -6   0  -5  678.83   26.20
  -7   0   5  527.45   26.60
  -7   0   5  486.75   23.30
  -7   0  -5  560.44   23.70
  -7   0  -5  490.05   27.00
  -8   0   5    3.60    7.30
  -8   0  -5    4.00    6.10
  -8   0  -5    6.90    8.10
  -8   0   5   -2.20    6.90
  -9   0  -5  122.09   14.60
  -9   0   5  155.98   17.70
   0   1  -5 2446.36   65.19
   0   1  -5 2463.75   60.39
   0  -1   5 2523.75   65.19
   0  -1   5 2487.65   60.39
   0  -1   5 2453.25   63.49
   0   1   5 2472.55   63.59
   0   1   5 2386.46   64.49
   0   1   5 2527.85   65.19
   0  -1  -5 2498.55   63.49
   0  -1  -5 2546.35   64.49
   0  -1  -5 2334.07   64.79
   0   1  -5 2552.94   63.69
   1   1  -5 2263.27   58.89
  -1   1   5 2205.58   59.19
  -1  -1  -5 2272.77   57.99
  -1  -1  -5 2173.88   58.39
  -1  -1  -5 2234.18   58.89
  -1  -1  -5 2168.38   58.69
   1   1  -5 2308.47   59.99
   1  -1   5 2301.87   59.19
   1   1  -5 2156.18   59.09
  -1   1   5 2265.47   58.79
   1  -1   5 2174.48   56.79
  -1  -1   5 2178.48   58.89
  -1   1  -5 2223.68   59.29
   1   1   5 2211.18   57.99
  -1  -1   5 2235.58   59.09
  -1  -1   5 2153.18   56.69
   1  -1  -5 2212.58   59.39
   1  -1  -5 2219.18   55.99
   1   1   5 2313.77   59.39
   1   1   5 2243.18   58.39
   1   1   5 2204.68   58.79
   1  -1  -5 2272.27   58.69
  -1   1  -5 2224.58   56.89
  -2  -1  -5 1795.52   46.40
  -2  -1  -5 1779.32   49.00
  -2  -1  -5 1776.12   49.50
  -2  -1  -5 1693.13   47.60
   2   1  -5 1825.22   49.60
   2   1  -5 1750.32   47.80
  -2   1   5 1734.33   46.40
   2  -1   5 1785.12   47.60
  -2   1   5 1726.23   47.90
   2  -1   5 1753.72   45.60
  -2   1   5 1823.42   48.20
  -2  -1  -5 1757.42   47.10
  -2  -1  -5 1800.02   48.80
   2   1  -5 1821.32   48.90
  -2   1  -5 1701.33   47.60
  -2  -1   5 1691.73   48.80
  -2   1  -5 1751.92   50.29
   2  -1  -5 1697.93   47.60
  -2  -1   5 1726.83   47.70
  -2  -1   5 1757.92   47.70
   2   1   5 1755.22   48.80
   2  -1  -5 1772.22   46.40
   2   1   5 1665.33   47.80
  -2  -1   5 1728.73   49.60
   2   1   5 1789.32   47.20
   2   1   5 1772.42   49.20
   2  -1  -5 1734.03   48.20
  -2   1  -5 1718.43   45.60
  -3   1   5  188.88   11.00
  -3  -1  -5  202.08    9.20
  -3   1   5  217.78   10.60
   3  -1   5  204.68    8.90
   3  -1   5  203.98    9.80
  -3   1   5  207.58   10.20
  -3  -1  -5  194.78   12.50
  -3  -1  -5  191.18   10.90
  -3  -1  -5  207.08    8.60
   3   1  -5  194.18    9.90
  -3  -1  -5  182.38   11.40
  -3   1  -5  200.88    9.50
   3   1   5  187.28   11.00
   3  -1  -5  207.58   10.80
   3   1   5  216.58   12.00
  -3   1  -5  201.88   12.90
  -3  -1   5  210.58   10.00
  -3   1  -5  218.98    9.80
   3  -1  -5  207.58   10.50
  -3  -1   5  206.98   11.90
   3   1   5  205.68    9.10
  -3   1  -5  205.38    9.00
  -3  -1   5  198.78   12.40
  -3   1  -5  196.18    6.90
  -4   1   5   34.10    6.20
  -4   1   5   37.00    5.60
  -4  -1  -5   32.90    7.30
   4   1  -5   24.10    4.30
  -4  -1  -5   31.40    3.80
  -4  -1  -5   34.70    7.00
  -4   1   5   40.00    6.80
  -4  -1  -5   36.70    6.20
  -4  -1   5   36.80    7.20
  -4   1  -5   36.00    5.10
  -4  -1   5   31.40    7.00
  -4   1  -5   47.20    8.20
  -4   1  -5   37.70    4.70
   4   1   5   34.00    4.20
  -4  -1   5   36.30    4.70
   4   1   5   19.90    5.50
   4   1   5   40.70    6.90
  -4   1  -5   33.70    5.10
  -5  -1  -5   45.30    8.10
   5   1  -5   43.50    4.90
  -5   1   5   51.69    8.40
  -5  -1  -5   53.09    9.40
  -5   1   5   41.90    7.10
  -5   1   5   54.19    5.80
  -5   1  -5   45.10    6.30
   5   1   5   49.50    3.30
  -5  -1   5   51.19    5.20
  -5  -1   5   55.19    8.80
  -5   1  -5   50.89    6.90
  -5   1  -5   73.99   10.30
  -5   1  -5   46.60    4.80
  -5  -1   5   38.60    8.40
  -6  -1  -5  173.48   13.80
  -6   1   5  159.78   13.20
  -6   1   5  147.59   12.20
  -6  -1  -5  163.38   14.70
  -6   1  -5  174.78   15.50
  -6  -1   5  142.59   14.00
  -6   1  -5  165.28   11.20
  -6  -1   5  138.39   12.80
  -7   1   5  288.87   18.50
  -7   1   5  288.77   17.20
  -7  -1  -5  264.77   17.50
  -7  -1  -5  278.57   20.20
  -7  -1   5  273.57   17.90
  -7  -1   5  266.07   19.30
  -7   1  -5  294.57   20.40
  -7   1  -5  233.88   14.70
  -8  -1  -5   59.59   10.50
  -8  -1  -5   51.29   12.90
  -8   1   5   49.99   11.10
  -8   1   5   39.50    8.70
  -8   1  -5   46.80   11.40
  -8  -1   5   75.99   14.10
  -8  -1   5   52.99   10.50
  -8   1  -5   52.79    8.60
   0   2   5   16.20    4.60
   0  -2   5   21.70    5.10
   0   2   5   25.10    5.20
   0  -2   5   23.30    3.30
   0   2  -5   20.80    3.20
   0  -2  -5   20.80    4.70
   0  -2  -5   26.10    4.60
   0  -2   5   23.10    3.90
   0  -2  -5   17.20    4.80
   0   2   5   14.60    5.20
   0  -2  -5   15.10    2.50
   0   2  -5   22.40    3.80
   0   2  -5   18.70    5.00
   1   2  -5  315.17   14.70
   1   2  -5  373.56   14.20
  -1  -2  -5  345.07   13.40
  -1  -2  -5  362.16   15.20
  -1   2   5  354.46   14.80
  -1   2   5  339.67   15.00
  -1  -2  -5  351.06   14.40
  -1   2   5  342.27   14.00
   1   2  -5  344.57   13.00
   1  -2   5  377.96   15.30
  -1  -2  -5  349.67   14.70
  -1  -2  -5  397.26   15.00
   1   2  -5  355.56   15.80
   1   2   5  380.36   13.50
  -1  -2   5  366.96   14.60
  -1   2  -5  354.56   12.00
  -1  -2   5  378.46   13.00
   1   2   5  342.87   14.80
   1  -2  -5  353.96   14.90
  -1  -2   5  394.56   15.40
  -1   2  -5  361.16   15.70
   1   2   5  356.26   14.70
   1   2   5  386.46   15.40
  -1   2  -5  357.06   11.80
   1  -2  -5  359.86   13.80
  -2   2   5  557.94   19.60
  -2   2   5  536.65   18.40
  -2  -2  -5  471.65   17.80
  -2  -2  -5  547.15   20.60
  -2  -2  -5  491.35   19.30
   2   2  -5  520.85   19.40
   2   2  -5  513.95   19.10
  -2  -2  -5  524.95   19.40
   2  -2   5  503.35   14.30
   2   2  -5  505.85   18.30
  -2  -2  -5  511.65   19.40
  -2   2   5  527.85   15.20
  -2  -2   5  522.05   20.90
   2   2   5  493.25   18.90
  -2   2  -5  504.25   14.80
   2   2   5  492.45   17.80
   2  -2  -5  547.05   19.70
  -2   2  -5  519.35   17.00
   2   2   5  522.75   18.50
  -2   2  -5  486.35   19.00
   2  -2  -5  507.75   15.20
  -2  -2   5  549.85   19.30
  -2  -2   5  568.14   18.90
   2   2   5  501.45   19.90
  -2  -2   5  540.65   19.80
   2   2   5  495.75   19.40
  -3  -2  -5  350.76   16.50
   3   2  -5  338.27   14.20
  -3  -2  -5  318.27   13.30
  -3   2   5  344.07   12.90
  -3   2   5  328.87   14.10
  -3   2   5  342.57   14.70
  -3  -2  -5  341.07   16.80
  -3  -2   5  333.27   17.10
  -3   2  -5  317.97   11.50
  -3  -2   5  325.87   16.10
  -3   2  -5  320.07   10.60
   3   2   5  319.47   13.20
   3   2   5  325.97   16.00
   3  -2  -5  301.47   12.60
   3   2   5  334.57   16.00
  -3   2  -5  345.47   17.10
   3   2   5  319.97   13.20
  -3   2  -5  313.77   14.00
  -3  -2   5  336.17   14.00
  -3   2  -5  320.87   10.80
   4   2  -5   45.70    6.10
  -4  -2  -5   42.20    5.50
  -4  -2  -5   58.79    8.90
  -4   2   5   38.60    6.10
  -4   2   5   54.29    6.90
  -4  -2  -5   48.80    8.70
   4   2   5   46.40    7.70
  -4   2  -5   42.00    5.80
   4   2   5   34.30    5.20
   4  -2  -5   45.60    6.40
  -4  -2   5   41.30    7.50
  -4   2  -5   45.40    8.30
   4   2   5   47.30    8.40
  -4   2  -5   46.40    3.50
  -4   2  -5   45.00    4.30
  -4  -2   5   52.19    9.00
   4   2   5   51.29    5.60
  -4   2  -5   45.20    4.70
  -5   2   5  533.25   21.50
   5   2  -5  487.25   17.70
  -5  -2  -5  466.45   22.50
  -5  -2  -5  500.95   24.40
  -5   2   5  509.95   20.50
   5   2   5  558.04   24.20
  -5   2  -5  531.85   17.60
  -5  -2   5  499.25   24.60
  -5   2  -5  537.05   17.90
  -5  -2   5  539.05   23.50
  -5   2  -5  507.65   24.20
  -5   2  -5  522.75   18.70
  -6  -2  -5    5.50    6.40
  -6  -2  -5   -5.60    5.30
  -6   2   5    6.60    5.40
  -6   2   5    9.30    5.00
   6  -2  -5    6.20    4.10
  -6   2  -5    9.70    4.20
  -6  -2   5    8.40    6.80
  -6  -2   5   15.80    7.70
  -6   2  -5   10.90    6.90
  -7  -2  -5   12.70    8.40
  -7   2   5   25.70    8.10
  -7   2   5   15.20    6.20
  -7  -2  -5   23.30    7.90
  -7   2  -5   23.60    8.90
  -7  -2   5   51.79   11.90
  -7  -2   5   18.90    7.80
  -7   2  -5   18.90    5.30
  -8   2   5   24.80    7.20
  -8   2   5   28.90    9.20
  -8  -2  -5   34.30   10.00
  -8  -2  -5   37.90   11.10
  -8  -2   5   33.20    9.90
  -8   2  -5   23.40   10.30
  -8   2  -5   28.20    6.50
  -8  -2   5   35.00   10.80
   0   3   5  139.29    6.20
   0   3   5  138.79   10.70
   0   3  -5  148.59    8.10
   0  -3  -5  135.79    9.80
   0  -3   5  146.79    8.20
   0  -3  -5  138.29    6.30
   0  -3   5  144.29    8.00
   0  -3  -5  145.29   10.20
   0   3  -5  134.69    8.10
   0   3  -5  132.69   11.10
   0   3   5  146.19    9.80
  -1   3   5  463.95   19.20
   1   3  -5  463.65   17.50
  -1  -3  -5  459.95   16.30
  -1  -3  -5  461.65   18.60
   1   3  -5  427.16   18.70
  -1  -3  -5  482.85   18.80
   1   3  -5  450.25   16.70
  -1   3   5  465.85   17.40
   1   3   5  471.25   19.20
  -1   3  -5  443.66   14.40
  -1   3  -5  474.95   19.60
  -1  -3   5  462.45   17.60
  -1  -3   5  449.95   16.70
   1   3   5  450.65   16.00
   1   3   5  435.76   18.30
  -1   3  -5  446.26   16.10
   1  -3  -5  456.85   18.70
  -2  -3  -5  342.27   15.00
  -2   3   5  358.96   14.40
  -2  -3  -5  361.46   17.20
  -2   3   5  337.97    9.90
   2   3  -5  342.37   15.70
   2   3  -5  339.47   16.00
   2   3  -5  363.46   15.40
  -2  -3  -5  346.27   15.50
  -2   3   5  360.26   16.80
   2   3   5  319.37   16.60
  -2  -3   5  338.97   16.10
   2   3   5  331.47   16.40
  -2   3  -5  347.07   14.40
   2   3   5  358.36   15.40
  -2   3  -5  333.17   10.10
  -2   3  -5  303.77   15.60
  -2   3  -5  356.56   14.30
   2  -3  -5  343.37   16.10
  -2  -3   5  352.06   17.50
   3   3  -5   54.79    8.10
   3   3  -5   57.59    7.40
  -3  -3  -5   49.20    7.60
  -3  -3  -5   53.39    8.30
  -3   3   5   56.49    6.20
  -3   3   5   45.10    4.90
  -3  -3  -5   49.10    7.30
  -3  -3   5   59.09    8.60
   3   3   5   52.69    8.50
   3   3   5   66.99    8.80
  -3   3  -5   53.29    5.40
   3  -3  -5   58.49    7.20
   3   3   5   51.39    7.60
  -3   3  -5   45.70    6.70
  -3  -3   5   47.30    8.40
   4   3  -5  120.39   10.60
  -4   3   5  118.39    8.70
   4   3  -5  128.69    9.50
  -4  -3  -5  106.09   11.50
  -4  -3  -5  117.19    9.10
  -4   3   5  123.09    8.30
  -4  -3  -5  112.69   11.20
  -4  -3   5  126.19   12.40
  -4   3  -5  127.09   11.80
  -4  -3   5  126.99   12.00
   4   3   5  116.59   11.50
   4   3   5  112.39    8.50
  -4   3  -5  117.19    9.60
  -4   3  -5  124.39    7.00
   4  -3  -5  127.69   10.00
  -4   3  -5  114.99    4.10
   4   3   5  114.89   11.20
   5   3  -5   13.50    4.20
  -5  -3  -5   13.20    6.90
  -5  -3  -5   -0.20    6.00
  -5   3   5    7.70    4.60
  -5   3   5    5.90    4.40
  -5  -3  -5    6.20    4.40
   5   3   5   -1.80    5.00
   5  -3  -5    5.90    4.50
  -5   3  -5    1.40    2.10
  -5  -3   5    2.90    6.20
  -5   3  -5    9.50    5.80
  -5   3  -5    2.10    4.30
  -5  -3   5    9.50    6.90
  -5   3  -5    4.80    2.00
  -6  -3  -5  114.09   13.20
  -6   3   5  151.88   11.70
  -6  -3  -5  128.59   14.30
  -6   3   5  119.49   10.50
  -6   3  -5  144.69   10.10
   6  -3  -5  137.29   10.20
   6   3   5  142.09   13.80
  -6  -3   5  141.69   14.00
  -6   3  -5  150.38   14.70
  -6   3  -5  124.49    7.20
  -6  -3   5  140.29   15.30
  -7  -3  -5   75.79   11.90
  -7   3   5   79.29    9.90
  -7  -3  -5  104.29   14.40
  -7   3   5  101.99   11.90
  -7  -3   5   90.19   14.60
  -7  -3   5   80.49   12.40
  -7   3  -5   91.89    7.00
  -7   3  -5   81.99   13.50
  -8   3   5   14.50    6.60
  -8  -3  -5   -4.70    6.80
  -8  -3  -5    8.50    8.80
  -8  -3   5   19.20    9.80
  -8  -3   5   29.70    9.50
  -8   3  -5   14.20    8.00
   0   4  -5  474.75   21.60
   0   4   5  449.46   20.50
   0   4   5  476.95   19.50
   0   4  -5  479.65   17.40
   0   4   5  485.65   15.40
   0  -4  -5  470.05   20.50
   0   4  -5  492.75   18.80
   0  -4   5  500.75   17.50
   0  -4  -5  492.35   19.50
   0  -4   5  506.15   20.60
   1   4  -5  286.07   16.20
  -1  -4  -5  255.17   14.10
  -1   4   5  258.07    7.80
   1   4  -5  257.47   12.90
  -1  -4  -5  264.57   14.70
   1   4  -5  272.27   13.40
  -1   4   5  252.37   12.80
  -1  -4  -5  232.78   11.60
   1   4   5  254.87   14.20
   1   4   5  254.57   11.70
  -1   4  -5  271.67   12.90
  -1   4  -5  277.17   15.80
  -1   4  -5  262.67   10.60
  -1  -4   5  257.47   13.10
   1  -4  -5  276.67   13.00
   1   4   5  263.67   15.50
   1  -4  -5  272.07   15.30
  -2   4   5  140.29    9.20
  -2  -4  -5  143.29   10.20
  -2  -4  -5  136.19   11.60
   2   4  -5  153.68   11.00
   2   4  -5  141.69   11.40
  -2   4   5  144.99   11.60
  -2   4   5  137.39    4.90
  -2  -4  -5  147.59   11.30
  -2   4   5  141.29    5.00
  -2   4  -5  148.79    5.90
   2   4   5  149.29   11.60
  -2   4  -5  162.08   13.00
   2  -4  -5  152.28   11.20
  -2   4  -5  156.98    9.90
  -2  -4   5  157.88   10.90
   2   4   5  141.29   12.00
   3   4  -5  544.35   22.20
  -3   4   5  541.35   16.50
   3   4  -5  553.74   22.40
  -3  -4  -5  570.64   23.10
  -3   4   5  527.95   19.10
  -3  -4  -5  553.64   22.60
  -3  -4  -5  488.35   23.00
  -3   4   5  496.45   23.20
   3   4   5  514.75   23.30
  -3  -4   5  518.35   22.50
  -3  -4   5  517.45   24.50
   3   4   5  505.75   23.20
  -3   4  -5  524.95   22.60
  -3   4  -5  544.85   21.40
   3  -4  -5  493.25   21.50
  -4   4   5   90.79   10.70
   4   4  -5   66.99    9.40
  -4  -4  -5   75.99   11.00
  -4  -4  -5   89.79   11.50
  -4   4   5   59.99    6.30
  -4   4   5   77.29    7.60
   4   4  -5   66.59    8.70
  -4  -4  -5   61.39    9.00
   4   4   5   56.29    9.50
   4  -4  -5   84.19    9.70
  -4  -4   5   85.79   12.60
  -4   4  -5   85.09   10.50
  -4   4  -5   80.09    9.40
  -4  -4   5   69.49   10.30
   4   4   5   58.69    9.80
   5   4  -5  296.67   18.80
  -5  -4  -5  322.97   20.10
  -5   4   5  316.27   14.50
   5   4  -5  318.87   15.80
  -5  -4  -5  292.37   16.40
  -5  -4  -5  344.97   20.30
  -5   4   5  297.97   14.60
  -5  -4   5  325.37   21.00
   5  -4  -5  334.47   16.60
  -5   4  -5  351.96   17.30
  -5   4  -5  322.97   19.30
  -5  -4   5  344.67   19.70
   5   4   5  304.07   19.10
  -6  -4  -5  259.27   18.60
  -6   4   5  243.88   13.50
  -6  -4  -5  250.17   19.80
   6  -4  -5  251.67   14.90
  -6  -4   5  259.07   18.90
   6   4   5  275.57   18.90
  -6   4  -5  261.67   15.10
  -6  -4   5  291.07   20.80
  -6   4  -5  288.27   19.10
  -7   4   5   79.09    9.20
  -7  -4  -5   82.99   13.60
  -7  -4  -5   70.49   13.30
  -7  -4   5   77.49   12.60
  -7   4  -5  110.29   13.00
  -7  -4   5   48.80   12.10
   7   4   5   81.89   13.20
  -8   4   5   14.40    6.00
  -8   4  -5   14.60    8.90
   0  -5  -5  588.34   22.50
   0  -5   5  551.44   19.80
   0  -5  -5  539.05   24.10
   0   5   5  543.45   18.10
   0   5  -5  532.55   21.80
   0   5   5  541.35   22.40
   0   5  -5  592.24   20.70
   0   5  -5  517.15   24.60
   0   5   5  550.64   24.30
   1   5  -5  420.66   22.00
  -1   5   5  449.46   21.70
  -1   5   5  439.66   13.80
   1   5  -5  450.75   18.90
  -1   5   5  424.56   18.70
  -1  -5  -5  452.05   20.70
   1   5  -5  461.65   19.70
  -1  -5  -5  455.65   21.50
  -1  -5  -5  415.66   17.20
  -1   5  -5  434.46   16.00
   1   5   5  464.65   17.60
   1   5   5  441.16   21.80
   1  -5  -5  468.25   21.70
   1   5   5  447.76   20.30
   1  -5  -5  432.86   18.10
  -1   5  -5  503.05   23.60
  -1   5  -5  457.35   19.20
  -1  -5   5  438.06   18.60
   2   5  -5   64.59   10.10
  -2   5   5   69.69    4.00
  -2  -5  -5   93.39    9.30
  -2   5   5   73.29    7.50
  -2  -5  -5   70.29   10.20
   2   5  -5   71.39    9.40
  -2   5   5   84.69   10.70
  -2   5   5   61.89    3.70
  -2  -5  -5   64.39    9.80
  -2  -5   5   59.19    8.30
   2   5   5   98.09   10.90
   2   5   5   56.09    9.10
  -2   5  -5   55.29    7.80
  -2   5  -5   53.99    9.70
  -2   5  -5   59.99    4.60
   2  -5  -5   67.39    7.30
   2  -5  -5   66.49    9.80
  -3  -5  -5  143.79   12.10
  -3  -5  -5  139.89   12.10
  -3   5   5  103.49   12.10
  -3  -5  -5  104.19   12.10
   3   5  -5  145.19   12.90
  -3   5   5  117.89    8.90
  -3   5   5  135.69    6.50
   3   5  -5  118.69   12.10
  -3  -5   5  114.59   13.00
   3   5   5  117.89   13.30
  -3  -5   5  142.99   12.20
  -3   5  -5  121.19   10.60
  -3   5  -5  118.09   12.30
   3  -5  -5  134.19   11.90
   3   5   5  154.78   13.40
  -4  -5  -5   99.39   12.30
  -4   5   5   94.09    8.00
  -4   5   5   91.69   12.00
   4   5  -5   74.19   10.30
  -4  -5  -5   99.09   10.80
   4   5  -5   80.89   10.40
  -4  -5  -5   85.19   11.70
   4  -5  -5   77.89   10.80
  -4  -5   5   86.19   12.30
   4   5   5  104.69   13.20
  -4   5  -5  106.89   11.90
  -4   5  -5   89.89   10.60
  -4   5  -5   91.89    9.60
  -4  -5   5   92.49   12.70
   4   5   5   83.09   12.20
  -5  -5  -5  181.48   14.30
  -5  -5  -5  201.18   17.20
  -5   5   5  208.98   17.70
  -5   5   5  168.78   10.60
   5   5  -5  179.58   15.60
  -5  -5  -5  169.38   16.20
   5   5  -5  168.58   12.60
  -5   5  -5  182.08   14.60
  -5   5  -5  163.08   13.90
   5   5   5  202.18   17.20
   5  -5  -5  193.68   14.00
  -5   5  -5  175.38   13.90
  -5  -5   5  171.98   15.20
  -5  -5   5  210.28   18.80
  -6  -5  -5   -0.30    6.70
  -6  -5  -5    0.40    7.30
  -6   5   5    4.90    7.30
  -6   5   5    6.60    4.30
  -6   5  -5   -9.10    5.10
  -6  -5   5    4.70    7.40
  -6   5  -5   16.30    5.90
  -6  -5   5    9.10    9.30
   6   5   5   10.40    8.30
  -6   5  -5    6.00    5.90
  -7   5   5   -0.60    6.90
  -7  -5  -5   -3.40    7.60
  -7  -5  -5   -5.80    7.10
  -7   5  -5   -4.90    6.00
   7   5   5    2.10    8.10
  -7  -5   5    3.80    8.50
  -7  -5   5   -7.20    6.70
   0  -6  -5   16.90    5.90
   0  -6  -5   18.70    7.70
   0   6   5   25.50    8.00
   0   6   5   17.60    5.80
   0   6  -5   31.70    9.60
   0   6  -5   28.80    7.50
   1   6  -5  146.29   15.50
  -1  -6  -5  170.68   13.30
  -1   6   5  157.88   15.00
  -1  -6  -5  176.08   15.40
   1   6  -5  129.69   12.00
  -1   6   5  174.28   12.20
  -1   6  -5  151.38   12.20
  -1   6  -5  144.19   14.80
   1  -6  -5  154.08   13.80
   1   6   5  167.68   14.60
  -1  -6   5  153.78   11.20
   1   6   5  152.78   12.80
  -2   6   5   42.40    9.60
  -2  -6  -5   25.00    8.50
   2   6  -5   61.59    9.10
  -2  -6  -5   52.09    8.10
  -2   6   5   53.19    7.80
   2   6  -5   51.19   10.20
  -2  -6  -5   50.09    9.20
  -2   6  -5   53.59   11.50
  -2  -6   5   54.09    8.60
   2   6   5   35.40    9.10
   2  -6  -5   27.20    8.20
  -2   6  -5   43.80    8.20
   2   6   5   36.00    8.30
   3   6  -5  224.58   16.90
  -3  -6  -5  208.58   15.50
  -3  -6  -5  188.28   15.80
   3   6  -5  187.88   14.60
  -3   6   5  195.88   11.70
  -3  -6  -5  230.58   15.30
  -3   6   5  206.28   16.30
  -3   6  -5  165.88   15.60
  -3   6  -5  192.08   13.90
   3   6   5  215.08   16.60
  -3  -6   5  222.38   15.80
   3   6   5  197.48   15.70
   3  -6  -5  204.08   15.50
   4   6  -5  137.89   13.30
   4   6  -5  130.79   14.00
  -4   6   5  121.09    9.20
  -4   6   5  116.49   14.60
  -4  -6  -5  125.99   13.50
  -4  -6  -5  127.69   14.90
  -4  -6  -5  133.99   13.10
   4   6   5  144.99   14.70
  -4  -6   5  106.49   12.60
  -4   6  -5  132.79   12.90
  -4   6  -5  112.49   11.70
   4  -6  -5  129.79   13.80
  -4  -6   5  115.19   14.30
  -4   6  -5  109.39   13.50
  -5  -6  -5    3.50    6.70
  -5  -6  -5    8.90    7.90
  -5   6   5    5.40    7.50
  -5   6   5    5.30    4.20
   5   6  -5   11.00    6.30
   5   6  -5   -4.30    5.50
  -5  -6  -5    7.40    7.40
   5  -6  -5    9.50    6.70
  -5  -6   5    1.30    6.80
  -5   6  -5   12.40    6.60
  -5   6  -5   15.40    7.10
  -5  -6   5    9.40    8.30
   5   6   5   13.10    8.90
  -5   6  -5    7.70    6.80
  -6  -6  -5   44.70   11.30
  -6   6   5   70.09   14.10
   6   6  -5   47.90   11.30
  -6  -6  -5   68.49   12.70
  -6  -6   5   73.09   13.90
   6   6   5   58.69   12.00
  -6   6  -5   58.49   10.70
  -6   6  -5   34.40   10.00
  -6  -6   5   68.59   13.20
  -6   6  -5   70.39   12.20
   0   7   5   83.29   13.10
   0   7  -5   61.89   11.80
   0  -7  -5   52.99   10.70
   0   7  -5   62.59   10.50
   0   7   5   56.49    9.60
  -1  -7  -5   19.90    9.50
  -1   7   5   37.00   10.00
   1   7  -5   28.30    9.60
  -1   7   5   41.10    7.70
   1   7  -5   36.90    8.40
  -1   7  -5   40.90    8.90
   1   7   5   39.30   10.40
   1   7   5   38.30    8.60
  -1   7  -5   27.80   10.20
   1  -7  -5   32.70    9.10
  -2  -7  -5  107.39   12.00
  -2   7   5  130.89   10.60
  -2  -7  -5  106.29   13.30
   2   7  -5  115.49   13.00
   2   7  -5  114.79   14.30
  -2   7   5  123.59   14.20
  -2  -7  -5  100.39   10.80
   2   7   5  121.99   13.90
   2  -7  -5   97.49   13.00
   2   7   5  125.59   14.20
  -2   7  -5  102.59   14.60
  -2   7  -5  126.19   12.40
   3   7  -5   21.00    8.30
  -3  -7  -5   27.90    7.50
  -3  -7  -5   14.50    8.10
   3   7  -5   17.00    7.90
  -3  -7  -5   15.20    7.80
  -3   7   5    6.50    7.30
  -3   7   5   18.00    5.70
   3   7   5   27.70    8.20
   3  -7  -5    7.70    7.70
  -3   7  -5   12.00    8.70
   3   7   5   24.10    8.70
  -3   7  -5   17.70    7.20
   4   7  -5   64.49   11.80
  -4   7   5   61.79    8.00
  -4  -7  -5   75.19   12.10
  -4   7   5   67.09   13.00
   4   7  -5   50.69   10.90
  -4  -7  -5   68.59   12.10
  -4  -7  -5   38.80   10.10
   4  -7  -5   69.49   11.70
  -4   7  -5   78.09   12.00
  -4   7  -5   59.89   10.40
   4   7   5   73.29   12.60
  -4   7  -5   46.10   11.20
  -5   7   5   -9.60    7.30
   5   7  -5   11.50    8.10
  -5  -7  -5    7.70    7.00
  -5  -7  -5    1.40    6.70
  -5  -7  -5    8.20    8.90
   5  -7  -5    3.80    6.10
   5   7   5   15.20    9.00
  -5  -7   5   11.20    8.50
  -5  -7   5   11.20    8.70
  -5   7  -5    7.60    7.10
  -5   7  -5   10.90    6.60
   0   8  -5   56.69   10.40
   0  -8  -5   27.80    9.50
   0   8   5   35.80    9.00
   0   8  -5   25.40   10.00
   0   8   5   57.39   11.80
  -1   8   5   29.10    9.50
   1   8  -5   25.60   10.20
  -1  -8  -5   37.30   10.10
   1   8  -5   18.60    7.70
  -1   8   5   15.00    7.20
   1   8   5   12.60    7.70
   1   8   5   24.80   10.10
   1  -8  -5   27.00   10.60
  -1   8  -5   28.60    8.30
  -1   8  -5   20.10    9.90
  -2  -8  -5   47.90   11.60
   2   8  -5   80.39   13.80
   2   8  -5   52.79   10.30
  -2   8   5  100.49   15.20
  -2   8   5  103.69   10.80
  -2   8  -5   86.29   15.40
   2   8   5   96.89   12.70
  -2   8  -5   67.59   11.00
   2  -8  -5   87.39   13.60
   2   8   5   81.79   13.40
  -3   8   5   17.80    9.40
  -3   8   5   50.69    7.60
   3   8  -5   38.80   11.20
  -3  -8  -5   39.60   10.90
   3   8  -5   35.40    9.60
  -3   8  -5   27.40    8.50
   3  -8  -5   18.50   10.10
  -3   8  -5   25.30    9.90
   3   8   5   55.19   12.30
  -4  -8  -5   44.70   11.10
   4   8  -5   44.40   10.10
   4   8  -5   33.30   10.40
  -4   8  -5   39.50   11.50
  -4   8  -5   56.79   11.00
   4  -8  -5   48.60   11.90
   0   9   5   15.30    7.70
   0   9  -5    0.10    6.20
   1   9  -5   12.60    9.00
  -1   9   5   40.10    8.60
  -1   9  -5   23.60    8.90
   0   0  -6  183.38    9.00
   0   0  -6  172.18    9.70
   0   0   6  187.48    9.80
   0   0   6  175.48    6.50
   0   0   6  172.68    9.00
   1   0  -6  102.39    7.20
   1   0   6  101.99    7.90
   1   0  -6  116.99    7.70
  -1   0   6  106.29    7.80
  -1   0   6   93.29    7.50
   1   0   6   95.89    7.30
   1   0   6  104.79    5.30
   1   0  -6  106.79    8.00
  -1   0  -6  106.19    6.80
  -1   0  -6   98.39    5.10
  -1   0  -6  102.29    7.50
   2   0  -6   51.59    6.40
   2   0   6   46.30    5.70
  -2   0   6   48.70    6.50
   2   0  -6   46.70    6.10
  -2   0  -6   50.29    5.80
   2   0  -6   53.99    6.70
  -2   0  -6   53.29    6.20
  -2   0   6   54.09    6.50
  -2   0  -6   39.00    4.80
  -2   0   6   55.89    6.80
   2   0   6   44.30    5.10
   2   0   6   60.39    6.20
  -2   0  -6   44.20    7.00
  -3   0  -6  827.82   25.50
  -3   0   6  833.02   28.20
   3   0   6  876.41   25.70
  -3   0  -6  885.31   27.20
  -3   0   6  926.61   26.90
  -3   0   6  843.02   28.20
   3   0  -6  879.81   28.20
   3   0  -6  826.52   26.40
  -3   0  -6  891.01   27.10
   3   0   6  839.72   26.90
  -3   0  -6  813.42   27.00
  -3   0  -6  822.82   29.90
   4   0   6   66.09    7.20
  -4   0  -6   56.39    8.90
  -4   0  -6   54.99    6.70
  -4   0   6   66.29    8.20
  -4   0   6   62.79    8.10
  -4   0  -6   71.99    5.50
  -4   0  -6   59.79    7.60
   4   0  -6   56.49    6.10
   4   0   6   58.79    5.20
  -4   0   6   58.19    6.10
  -5   0   6  307.37   12.30
   5   0  -6  271.87   12.00
  -5   0   6  247.58   16.10
  -5   0   6  292.27   15.70
  -5   0  -6  261.97   13.80
  -5   0  -6  289.87   10.30
  -5   0  -6  311.97   18.30
  -5   0  -6  274.87   14.60
  -6   0  -6   50.89    8.30
  -6   0   6   40.70    8.20
  -6   0  -6   56.29   10.80
  -6   0   6   70.89   11.20
  -7   0   6  345.47   19.60
  -7   0   6  361.96   22.00
  -7   0  -6  348.07   22.80
  -7   0  -6  350.86   18.70
  -8   0   6   24.00    8.10
  -8   0   6    0.10    6.90
  -8   0  -6   36.50    8.20
  -8   0  -6   20.60   10.60
   0  -1   6  493.95   18.20
   0  -1  -6  534.45   18.00
   0   1  -6  504.55   18.50
   0  -1  -6  502.05   18.80
   0   1  -6  522.85   17.20
   0   1   6  505.45   18.30
   0   1   6  528.85   18.10
   0  -1  -6  526.65   16.60
   0   1   6  496.75   16.60
   0  -1   6  516.15   17.30
   1   1  -6 9553.84  237.88
  -1  -1  -6 9737.63  238.38
  -1  -1  -6 9903.31  238.28
   1   1  -6 9633.24  238.78
   1  -1   6 9640.54  238.38
  -1  -1  -6 9525.25  237.48
   1   1  -6 9738.23  239.18
  -1   1   6 9132.39  237.78
  -1   1   6 9544.95  237.18
  -1  -1  -6 9850.31  236.68
   1  -1   6 9694.43  236.08
  -1   1   6 9868.81  238.78
   1   1   6 9999.00  238.28
   1  -1  -6 9383.06  238.58
  -1   1  -6 9733.33  233.48
  -1  -1   6 9937.31  238.68
   1   1   6 9658.03  238.38
  -1   1  -6 9328.77  238.38
  -1  -1   6 9522.75  237.98
  -1  -1   6 9865.21  235.18
  -1   1  -6 9837.82  236.18
   1  -1  -6 9315.57  234.98
   1   1   6 9390.96  236.58
   1  -1  -6 9960.00  238.08
  -2  -1  -6   58.99    5.50
   2  -1   6   64.89    6.70
  -2  -1  -6   68.39    6.00
  -2   1   6   50.29    6.20
  -2   1   6   61.39    5.60
   2  -1   6   61.09    5.20
   2   1  -6   47.90    6.90
  -2  -1  -6   56.89    7.60
   2   1  -6   70.09    7.80
  -2  -1  -6   49.60    6.40
   2   1  -6   53.89    7.10
  -2  -1  -6   50.99    6.90
  -2  -1  -6   47.30    6.20
  -2   1   6   55.49    6.60
  -2  -1   6   38.50    6.20
  -2  -1   6   50.19    7.40
   2   1   6   49.30    6.40
  -2  -1   6   51.59    6.50
   2   1   6   52.69    7.30
  -2  -1   6   52.29    5.60
   2  -1  -6   50.89    5.30
  -2   1  -6   44.40    5.80
  -2   1  -6   58.79    4.70
   2   1   6   53.49    6.90
  -2   1  -6   56.29    4.90
   2  -1  -6   45.20    6.40
   2  -1  -6   48.50    5.90
   2   1   6   54.69    5.90
  -3   1   6 2488.95   66.69
   3  -1   6 2473.35   65.89
  -3  -1  -6 2453.15   68.29
   3  -1   6 2387.16   64.49
  -3  -1  -6 2500.35   64.19
  -3   1   6 2459.65   67.59
  -3  -1  -6 2481.55   65.39
  -3  -1  -6 2495.25   69.89
   3   1  -6 2434.76   66.29
  -3   1   6 2471.95   66.49
  -3  -1  -6 2488.35   67.69
   3   1   6 2514.85   65.39
   3  -1  -6 2515.15   66.89
  -3  -1   6 2411.56   69.39
   3  -1  -6 2494.05   66.29
  -3  -1   6 2553.04   66.29
  -3   1  -6 2497.15   65.99
   3   1   6 2537.55   68.19
  -3  -1   6 2558.34   68.79
  -3   1  -6 2531.65   65.19
  -3   1  -6 2535.35   70.59
   3   1   6 2499.05   67.89
  -3   1  -6 2452.95   64.69
  -3   1  -6 2501.95   66.19
  -4  -1  -6   20.90    6.90
   4   1  -6   28.30    4.60
  -4  -1  -6   29.70    4.20
  -4  -1  -6   21.40    5.20
  -4   1   6   25.00    5.70
  -4  -1  -6   30.70    4.10
  -4  -1  -6   25.50    6.20
  -4   1   6   32.50    5.20
  -4   1   6   24.40    5.90
  -4  -1   6   24.20    4.50
  -4   1  -6   32.40    4.90
   4   1   6   16.90    5.70
   4   1   6   35.70    6.50
  -4   1  -6   21.50    7.10
  -4  -1   6   26.40    6.10
  -4   1  -6   27.80    5.10
   4   1   6   18.80    3.60
  -4  -1   6   29.40    7.60
  -4   1  -6   32.10    5.00
   5   1  -6  526.95   17.70
  -5   1   6  520.75   21.90
  -5   1   6  506.55   21.60
  -5  -1  -6  476.95   21.50
  -5   1   6  517.85   18.60
  -5  -1  -6  499.65   24.20
  -5  -1   6  503.75   17.60
  -5   1  -6  492.95   18.90
  -5  -1   6  516.65   22.90
   5   1   6  510.75   15.60
  -5  -1   6  505.75   23.80
  -5   1  -6  516.75   19.40
  -5   1  -6  521.85   24.60
  -5   1  -6  506.05   17.20
  -6  -1  -6   80.79   10.90
  -6  -1  -6   69.29   11.70
  -6   1   6   97.29   10.20
  -6   1   6   86.79   11.20
  -6  -1   6   85.99   12.90
  -6  -1   6   74.99   10.30
  -6   1  -6  104.29   13.70
  -6   1  -6   77.09    8.70
  -7  -1  -6  412.36   25.30
  -7   1   6  465.15   22.50
  -7   1   6  460.25   24.00
  -7  -1  -6  524.55   24.20
  -7  -1   6  496.35   26.00
  -7   1  -6  465.75   20.40
  -7   1  -6  488.15   26.70
  -7  -1   6  428.36   23.00
  -8  -1  -6    7.00    7.80
  -8  -1  -6   -1.80    6.50
  -8   1   6   27.10    9.00
  -8   1   6   11.10    7.00
  -8   1  -6   16.80    6.20
  -8  -1   6   30.10    9.40
  -8  -1   6   30.10   10.00
  -8   1  -6   -6.20    6.60
   0  -2   6   85.99    6.60
   0   2   6   74.09    7.80
   0  -2  -6   93.09    7.40
   0  -2  -6   83.19    7.90
   0   2  -6   88.59    8.40
   0   2  -6   90.89    4.90
   0  -2  -6   87.69    4.90
   0  -2   6   90.89    5.10
   0   2   6   82.89    8.40
   0   2  -6   80.59    6.40
   0  -2   6   91.59    8.20
   0   2   6   87.79    7.70
   0  -2  -6  102.69    9.40
   0  -2  -6   92.69    7.80
   1   2  -6  187.58   10.20
  -1  -2  -6  190.98   10.50
  -1  -2  -6  179.48   10.90
  -1   2   6  177.78    9.90
   1   2  -6  179.98    8.50
  -1   2   6  173.78   10.70
   1   2  -6  174.98   11.20
  -1   2   6  175.58   10.70
   1   2  -6  166.08   10.70
  -1  -2  -6  178.38    9.30
   1  -2   6  186.78   11.00
  -1  -2  -6  196.28   10.40
   1  -2   6  185.98    8.00
  -1  -2  -6  156.08    9.80
  -1   2  -6  167.68   11.30
   1  -2  -6  175.68    9.60
  -1   2  -6  183.48    7.40
   1   2   6  191.08   10.80
  -1   2  -6  185.98    8.20
   1   2   6  207.08    9.60
  -1  -2   6  206.28   11.20
  -1  -2   6  175.68   10.30
   1   2   6  174.88   11.30
   1   2   6  195.08   10.70
  -1  -2   6  180.98    8.40
  -2   2   6  682.93   23.10
   2  -2   6  680.13   19.40
   2   2  -6  707.13   22.90
  -2  -2  -6  700.83   23.00
  -2  -2  -6  665.43   24.60
   2   2  -6  656.83   23.70
   2  -2   6  696.53   23.90
  -2   2   6  689.13   19.40
   2   2  -6  701.73   24.10
  -2  -2  -6  701.73   24.10
  -2  -2  -6  730.73   26.50
  -2  -2   6  700.93   22.70
   2   2   6  707.13   24.20
  -2   2  -6  702.33   21.60
   2  -2  -6  707.93   19.50
   2   2   6  686.23   23.60
  -2   2  -6  684.83   19.80
  -2  -2   6  671.63   23.80
   2   2   6  687.23   23.30
  -2  -2   6  694.83   24.30
   2   2   6  679.73   24.60
  -2  -2   6  689.63   26.10
  -2   2  -6  689.23   24.20
  -3   2   6   45.80    6.60
  -3  -2  -6   45.80    7.70
   3   2  -6   43.70    6.50
  -3  -2  -6   56.79    8.10
   3  -2   6   43.70    3.60
  -3  -2  -6   44.50    6.10
  -3   2   6   41.50    5.00
  -3   2  -6   43.60    4.40
  -3   2  -6   38.50    3.80
   3  -2  -6   43.50    5.30
  -3  -2   6   48.50    8.10
  -3  -2   6   39.10    5.90
  -3  -2   6   42.60    7.00
   3   2   6   38.20    5.70
   3   2   6   50.39    7.30
  -3   2  -6   44.40    4.30
   3   2   6   35.70    7.10
  -3   2  -6   36.00    7.40
  -3   2  -6   35.60    5.80
   4   2  -6  467.55   17.90
  -4   2   6  484.55   18.40
  -4  -2  -6  447.36   20.80
  -4   2   6  475.15   19.00
  -4  -2  -6  457.85   17.20
  -4  -2  -6  471.85   22.20
  -4   2  -6  483.05   15.90
   4   2   6  476.15   17.00
  -4  -2   6  516.65   21.80
  -4  -2   6  451.15   22.30
  -4   2  -6  474.35   14.40
  -4  -2   6  482.45   18.10
   4   2   6  485.05   21.20
  -4   2  -6  473.75   15.50
   4  -2  -6  485.85   18.30
   4   2   6  481.85   21.10
  -4   2  -6  490.35   22.50
  -4   2  -6  459.85   18.20
  -5  -2  -6  169.98   13.10
  -5  -2  -6  131.99    8.40
  -5   2   6  155.88   11.40
  -5   2   6  141.99   11.10
   5   2  -6  158.28    9.10
  -5  -2  -6  135.19   13.90
   5   2   6  165.58   12.70
  -5  -2   6  155.18   14.00
  -5   2  -6  141.59    9.20
   5   2   6  153.08   13.30
  -5   2  -6  133.89   13.70
  -5   2  -6  154.88    8.80
  -5   2  -6  147.39    8.30
  -5  -2   6  146.79   13.50
  -6  -2  -6   39.20    8.50
  -6   2   6   36.90    8.10
  -6  -2  -6   34.70   10.10
  -6   2   6   29.40    6.90
  -6   2  -6   43.40   10.30
  -6  -2   6   45.90    9.10
  -6   2  -6   48.10    6.80
  -6  -2   6   32.70    9.20
  -7   2   6   73.99   11.40
  -7  -2  -6   84.49   12.70
  -7  -2  -6   42.00   10.80
  -7   2   6   66.59    9.60
  -7   2  -6   61.89    7.90
  -7  -2   6   74.49   13.40
  -7  -2   6   66.29   10.90
  -7   2  -6   83.59   13.40
  -8   2   6   60.69   11.20
  -8   2   6   75.59   11.00
  -8  -2  -6   83.19   13.20
  -8  -2  -6   73.69   14.00
  -8   2  -6   60.39    8.70
  -8   2  -6   85.69   15.10
  -8  -2   6   84.79   14.70
  -8  -2   6   63.39   11.50
   0   3  -6 2844.72   79.89
   0  -3  -6 2933.11   79.19
   0   3   6 2889.21   78.29
   0   3   6 3004.50   72.89
   0  -3   6 2906.41   75.69
   0   3   6 2867.41   79.19
   0   3  -6 2975.60   75.99
   0   3  -6 3003.10   75.49
   0  -3  -6 2871.31   78.09
   0  -3   6 2889.01   75.19
   0  -3  -6 2925.11   72.79
  -1  -3  -6  441.66   18.20
   1   3  -6  428.26   16.80
  -1  -3  -6  423.76   15.50
   1   3  -6  442.66   16.10
  -1  -3  -6  398.06   18.30
  -1   3   6  438.56   18.70
  -1   3   6  414.86   17.00
   1   3  -6  405.16   18.40
  -1   3  -6  425.56   15.20
   1   3   6  418.96   15.40
  -1   3  -6  448.86   19.30
   1   3   6  441.46   18.90
   1  -3  -6  424.16   18.20
  -1   3  -6  443.36   14.50
   1   3   6  449.66   18.50
  -1  -3   6  430.26   16.90
  -1  -3   6  436.76   15.80
   2   3  -6  944.81   30.70
  -2  -3  -6  910.81   31.30
  -2   3   6  975.10   30.60
  -2   3   6  998.60   33.30
  -2  -3  -6  979.30   31.30
   2  -3   6  976.40   25.20
  -2  -3  -6 1049.20   33.80
   2   3  -6  987.10   34.90
   2   3  -6  989.90   32.80
  -2   3  -6  957.00   32.70
  -2   3  -6  955.50   29.40
   2   3   6  974.80   32.90
   2   3   6 1009.80   33.50
  -2  -3   6 1025.10   35.00
  -2  -3   6  939.21   36.70
   2   3   6 1029.80   31.50
   2  -3  -6  929.11   32.00
  -2  -3   6 1003.60   32.50
  -2   3  -6 1009.80   26.30
  -3  -3  -6  878.91   31.40
  -3  -3  -6  854.41   32.00
  -3  -3  -6  891.81   29.60
  -3   3   6  893.11   25.30
   3   3  -6  948.71   30.60
  -3   3   6  893.31   28.90
   3   3  -6  835.72   30.00
   3  -3  -6  891.41   30.40
  -3   3  -6  903.41   23.20
  -3  -3   6  946.01   34.10
  -3   3  -6  876.11   30.60
  -3  -3   6  899.01   31.80
   3   3   6  950.70   32.20
  -3   3  -6  916.71   27.70
  -3   3  -6  876.51   23.10
   3   3   6  886.11   31.80
  -4   3   6   73.79    6.90
  -4  -3  -6   81.19   11.10
  -4   3   6   67.99    7.90
  -4  -3  -6   88.29   11.10
  -4  -3  -6   80.39    8.20
   4   3  -6   62.89    7.60
  -4  -3   6   71.89   10.50
  -4   3  -6   76.09    5.80
   4  -3  -6   88.99    9.10
  -4   3  -6   62.29    7.80
  -4   3  -6   76.09    9.70
   4   3   6   74.59    9.90
  -4   3  -6   75.19    3.80
  -4   3  -6   73.79    3.60
   4  -3  -6   66.79    6.50
  -4  -3   6   79.19    9.90
   4   3   6   76.19   10.30
  -5  -3  -6  333.67   20.10
  -5   3   6  375.36   16.50
  -5  -3  -6  325.97   15.10
  -5   3   6  356.26   16.10
  -5  -3  -6  348.17   19.50
   5   3  -6  359.76   15.70
  -5  -3   6  337.67   20.00
   5  -3  -6  352.06   16.80
  -5  -3   6  344.37   21.00
  -5   3  -6  339.97   12.30
  -5   3  -6  328.87   20.10
   5   3   6  398.36   20.40
   5   3   6  328.57   19.10
  -5   3  -6  345.87   11.30
  -5   3  -6  343.57   16.30
  -6  -3  -6  327.17   20.90
  -6   3   6  309.27   16.20
  -6   3   6  315.97   17.00
  -6  -3  -6  335.67   20.70
   6   3   6  350.36   20.30
  -6   3  -6  337.27   17.10
  -6   3  -6  322.87   11.90
  -6  -3   6  314.77   22.30
   6  -3  -6  314.67   16.00
  -6   3  -6  347.57   21.10
  -6  -3   6  331.27   20.20
  -7   3   6  287.37   16.00
  -7   3   6  257.47   17.00
  -7  -3  -6  245.88   18.60
  -7  -3  -6  264.77   21.10
  -7  -3   6  258.37   21.30
  -7   3  -6  269.67   11.70
  -7   3  -6  231.68   18.60
  -7  -3   6  250.57   19.60
  -8   3   6   93.59   11.10
  -8  -3  -6   66.79   14.10
  -8  -3  -6   63.59   13.60
  -8   3  -6   85.29   15.10
  -8  -3   6   86.89   14.20
  -8  -3   6   76.69   14.70
   0  -4  -6   10.00    2.70
   0   4   6    6.90    2.40
   0  -4   6    4.80    3.60
   0   4  -6   13.20    4.20
   0  -4  -6    9.10    5.00
   0   4  -6    7.50    3.50
   0   4   6    3.50    4.00
   0  -4  -6    6.90    5.20
   0   4   6    0.90    4.70
   0  -4   6    6.40    3.20
   0   4  -6    4.60    5.10
   1   4  -6  122.29   11.90
  -1  -4  -6  155.18   11.00
  -1   4   6  125.99    9.70
  -1  -4  -6  134.79    8.50
   1   4  -6  153.38    9.70
  -1  -4  -6  152.18   11.60
   1   4  -6  158.08    9.90
  -1   4   6  142.49   11.40
  -1   4  -6  143.99    9.00
  -1   4  -6  148.99    7.70
  -1   4  -6  128.19   11.60
   1   4   6  155.28    8.70
  -1  -4   6  122.69    9.50
   1   4   6  141.59   11.00
   1  -4  -6  131.09   11.10
   1  -4  -6  139.89    9.90
   1   4   6  131.39   11.20
  -2   4   6  150.38   12.00
  -2   4   6  155.48   10.30
  -2  -4  -6  154.98   10.70
   2   4  -6  152.98   10.30
  -2  -4  -6  160.08   11.70
  -2  -4  -6  170.88   13.10
   2   4  -6  145.39   11.50
  -2   4  -6  142.39    9.50
  -2  -4   6  154.78   11.40
   2  -4  -6  142.19   11.40
   2   4   6  142.39   11.80
  -2   4  -6  153.08   12.90
   2   4   6  130.09   12.00
  -2   4  -6  144.89    6.30
  -3  -4  -6   81.19    9.90
   3   4  -6  107.59   10.30
  -3   4   6   96.79   10.80
  -3  -4  -6   91.89   10.20
  -3  -4  -6  111.99   11.60
  -3   4   6   93.29    4.80
   3   4  -6   98.49   10.30
  -3   4   6   78.99    7.70
  -3   4  -6   91.49    8.40
   3   4   6   81.69   10.30
  -3   4  -6   83.49    9.70
  -3  -4   6   98.29   12.20
   3   4   6   93.79   10.60
   3  -4  -6   99.89   10.60
  -3  -4   6   99.09   11.00
   4   4  -6  109.09   10.80
  -4   4   6  122.99   12.40
  -4  -4  -6  133.29   11.20
  -4  -4  -6  110.29   12.60
   4   4  -6  118.09   10.50
  -4   4   6  114.69    7.50
  -4  -4  -6  122.19   12.80
  -4   4   6  120.19    9.30
  -4   4  -6  133.79   10.70
   4   4   6  132.39   12.70
  -4  -4   6  105.39   11.90
  -4   4  -6  120.79   12.40
   4   4   6  108.79   11.80
  -4  -4   6  155.08   14.30
   4  -4  -6  131.79   11.00
  -4   4  -6  130.29   11.40
  -5  -4  -6    4.50    7.70
  -5  -4  -6   24.40    6.30
   5   4  -6   12.20    5.00
  -5   4   6   15.70    4.50
  -5  -4  -6   15.60    7.40
  -5   4   6   12.70    5.10
   5  -4  -6   12.80    5.80
  -5   4  -6   12.50    6.40
   5   4   6   15.20    8.30
  -5  -4   6   10.20    7.00
  -5  -4   6   15.40    7.70
  -5   4  -6   14.50    5.80
  -6  -4  -6  110.49   15.00
  -6   4   6  123.29   10.40
  -6  -4  -6  133.69   15.10
  -6  -4   6  158.88   15.10
  -6   4  -6  151.78   14.40
   6  -4  -6  138.09   11.30
  -6   4  -6  136.79   11.40
  -6  -4   6   99.09   15.70
   6   4   6  145.79   15.50
  -7  -4  -6   30.80   10.00
  -7   4   6   28.90    6.60
  -7  -4  -6   16.90    9.10
  -7  -4   6   29.70    9.40
   7   4   6   41.30   11.30
  -7   4  -6   30.30    9.60
  -7  -4   6   43.30   11.80
  -8   4   6    5.10    5.80
  -8   4  -6   20.10    9.40
   0  -5  -6    8.50    5.30
   0   5   6   11.60    5.60
   0   5  -6   12.60    7.20
   0   5   6   11.40    3.10
   0   5   6    7.60    6.00
   0   5  -6   12.10    4.40
   0  -5   6   11.50    3.90
   0   5  -6    0.60    4.30
   0  -5  -6   11.90    5.90
   1   5  -6  152.68   13.40
  -1  -5  -6  110.09   11.70
  -1   5   6  151.28   10.90
  -1  -5  -6  145.09    9.20
   1   5  -6  146.19   10.60
  -1   5   6  156.68   13.70
   1   5  -6  157.58   11.20
  -1  -5  -6  144.89   11.80
  -1  -5   6  142.69   10.50
   1   5   6  155.28    9.20
   1  -5  -6  157.08   13.70
  -1   5  -6  121.49    8.10
   1   5   6  131.09   12.40
  -1   5  -6  123.19   12.70
   1  -5  -6  137.79   10.70
   1   5   6  121.19   11.90
  -1   5  -6  133.09   10.00
   2   5  -6 1500.35   47.00
  -2   5   6 1511.55   50.19
  -2  -5  -6 1565.34   49.50
  -2  -5  -6 1542.65   49.20
  -2  -5  -6 1509.15   46.00
   2   5  -6 1519.85   49.90
  -2   5   6 1503.75   45.30
  -2   5  -6 1508.55   50.39
  -2  -5   6 1554.44   47.60
   2   5   6 1537.35   50.49
  -2   5  -6 1545.95   40.30
   2   5   6 1497.35   48.90
   2  -5  -6 1516.55   44.80
  -2   5  -6 1608.54   46.70
   2  -5  -6 1433.66   48.40
  -3   5   6   36.80    8.80
  -3  -5  -6   36.20    8.40
  -3   5   6   29.50    5.70
   3   5  -6   33.20    7.50
  -3  -5  -6   21.50    6.00
  -3  -5  -6   37.90    8.50
   3   5  -6   27.30    7.10
  -3   5  -6   27.60    6.40
   3  -5  -6   35.90    8.00
   3   5   6   40.80    8.70
   3   5   6   29.90    8.80
  -3   5  -6   37.40    8.50
  -3  -5   6   25.40    7.50
   4   5  -6   15.80    6.70
  -4  -5  -6   17.50    7.10
  -4  -5  -6   21.90    8.10
  -4   5   6   11.20    4.50
  -4  -5  -6   11.20    6.50
  -4   5   6    8.50    7.10
   4   5  -6   31.80    8.30
   4  -5  -6    8.90    6.60
  -4   5  -6   22.10    6.50
  -4  -5   6   27.70    9.40
   4   5   6   17.10    7.70
  -4   5  -6   15.40    6.80
   4   5   6   17.80    7.60
  -4   5  -6   22.40    7.50
  -4  -5   6    8.40    6.40
  -5   5   6   16.90    8.70
  -5  -5  -6   24.30    8.80
  -5  -5  -6    8.90    7.20
  -5  -5  -6    6.60    6.00
   5   5  -6   13.30    7.20
   5   5  -6   33.60    7.60
  -5   5   6   19.00    5.40
  -5   5  -6   19.70    7.50
  -5   5  -6   31.10    7.90
   5   5   6   19.70    8.00
   5  -5  -6   11.20    6.20
  -5  -5   6   14.40    7.90
  -5   5  -6   21.50    6.90
  -5  -5   6   21.90    9.50
  -6   5   6  132.79   10.10
  -6  -5  -6  109.69   14.60
  -6   5   6  121.89   14.90
  -6  -5  -6  110.99   15.20
  -6  -5   6  136.89   15.00
  -6   5  -6  115.99   13.40
   6   5   6  110.79   14.20
  -6  -5   6  104.29   15.40
  -6   5  -6  135.09   13.20
  -6   5  -6  108.49   12.00
  -7  -5  -6    9.80    8.20
  -7   5   6    7.10   13.20
  -7  -5  -6   21.70    9.50
  -7   5   6   22.30    5.90
  -7   5  -6   20.20    8.50
  -7  -5   6   21.50    8.90
  -7  -5   6    4.70   15.10
   7   5   6   10.60    8.40
   0   6  -6  321.47   16.80
   0  -6  -6  281.67   18.80
   0   6   6  253.77   17.80
   0   6  -6  295.07   19.50
   0   6   6  300.47   17.00
   0  -6  -6  314.17   16.70
  -1   6   6   31.00    7.10
   1   6  -6   35.20    9.10
  -1  -6  -6   20.40    8.10
  -1  -6  -6   44.60    8.30
   1   6  -6   33.90    7.10
  -1   6   6   30.00    9.50
  -1   6  -6   39.10    7.50
   1   6   6   38.50    9.40
  -1  -6   6   37.40    7.50
   1   6   6   36.00    7.80
  -1   6  -6   45.90   10.70
   1  -6  -6   31.70    8.30
  -2   6   6   62.39    8.70
   2   6  -6   53.99    8.80
  -2  -6  -6   56.09   10.70
  -2  -6  -6   39.80    8.50
  -2   6   6   45.30    9.80
  -2  -6  -6   43.00    7.40
   2   6  -6   52.39   10.90
  -2  -6   6   31.20    7.40
  -2   6  -6   46.00   10.20
  -2   6  -6   48.90    8.20
   2  -6  -6   38.00    9.10
   2   6   6   62.09   11.40
   2   6   6   28.10    8.10
  -3  -6  -6   11.50    6.10
  -3   6   6   28.30    5.90
   3   6  -6   11.10    6.70
   3   6  -6   16.20    7.30
  -3  -6  -6   19.10    7.70
  -3   6   6   12.40    7.30
  -3  -6  -6   17.80    7.20
  -3   6  -6   10.80    7.40
  -3   6  -6   16.70    6.00
  -3  -6   6    8.80    6.70
   3   6   6   20.40    8.00
   3  -6  -6   18.50    7.90
   3   6   6   15.90    8.40
   4   6  -6   16.70    7.30
  -4  -6  -6   20.20    8.30
   4   6  -6   11.90    7.60
  -4  -6  -6   10.40    7.40
  -4   6   6   16.10    8.30
  -4  -6  -6   29.80    8.60
  -4   6   6   17.10    5.50
  -4  -6   6    8.80    7.80
   4   6   6   24.90    9.00
   4   6   6   14.20    8.30
  -4   6  -6    8.20    6.50
  -4  -6   6   25.10    8.70
   4  -6  -6   18.80    7.80
  -4   6  -6    4.50    6.80
  -4   6  -6   20.80    7.00
  -5   6   6   42.90    6.60
  -5  -6  -6   56.29   10.80
   5   6  -6   57.19   11.30
   5   6  -6   49.30    9.70
  -5  -6  -6   48.10   10.70
  -5  -6  -6   33.90    9.90
  -5   6   6   49.50   12.40
  -5   6  -6   62.99   10.40
   5   6   6   61.19   12.00
   5  -6  -6   53.89   10.30
  -5  -6   6   60.49   12.30
  -5   6  -6   47.40    9.90
  -5  -6   6   36.20    9.70
  -5   6  -6   53.69   10.10
  -6  -6  -6   71.59   13.90
  -6   6   6   64.29   12.90
   6   6  -6   70.29   12.40
  -6  -6  -6   95.09   13.80
  -6  -6   6   74.69   15.40
  -6  -6   6   61.59   12.20
  -6   6  -6   75.29   12.70
  -6   6  -6   83.59   11.00
   6   6   6   94.39   15.30
   0   7   6   -4.30    5.40
   0   7   6   12.00    7.50
   0   7  -6    0.00    7.00
   0   7  -6    1.50    5.80
   0  -7  -6    0.20    6.70
   1   7  -6   73.49   10.70
  -1   7   6   71.99   12.30
  -1   7   6   63.99    9.30
   1   7  -6   65.79   12.10
  -1  -7  -6   57.69   11.20
   1   7   6   67.89   12.00
   1  -7  -6   59.69   11.10
   1   7   6   79.99   11.80
  -1   7  -6   62.09    9.80
  -1   7  -6   58.09   12.30
   2   7  -6  162.38   16.40
  -2  -7  -6  189.18   16.40
  -2  -7  -6  176.38   15.30
  -2   7   6  157.08   15.70
  -2   7   6  191.88   13.40
   2   7  -6  186.58   14.30
   2   7   6  176.58   15.20
   2   7   6  183.98   16.30
  -2   7  -6  195.98   17.80
   2  -7  -6  151.68   15.50
  -2   7  -6  177.78   13.90
  -3  -7  -6   55.39   10.50
  -3  -7  -6   30.60    9.60
  -3   7   6   49.70   11.10
  -3   7   6   33.30    7.20
   3   7  -6   40.80    9.40
   3   7  -6   47.30    9.90
  -3  -7  -6   56.99   10.10
   3   7   6   53.39   10.90
   3  -7  -6   44.70   10.90
  -3   7  -6   48.50    9.30
  -3   7  -6   44.60   11.90
   3   7   6   50.79   10.80
  -4  -7  -6  176.48   16.30
  -4  -7  -6  172.78   15.30
  -4   7   6  148.59   11.20
  -4   7   6  155.58   16.40
  -4  -7  -6  151.88   16.20
   4   7  -6  157.88   15.90
   4   7  -6  159.68   15.60
  -4   7  -6  161.88   16.90
   4  -7  -6  190.48   16.20
   4   7   6  156.08   16.90
  -4   7  -6  158.18   14.60
  -4   7  -6  172.38   14.20
  -5   7   6   44.60   11.30
  -5  -7  -6   32.10    9.60
   5   7  -6   29.20   10.00
  -5  -7  -6   45.50    9.90
  -5  -7  -6   27.40   10.30
   5  -7  -6    8.90    7.80
  -5   7  -6   28.00    8.90
  -5   7  -6   32.90    9.00
   5   7   6   15.70    9.80
  -5   7  -6   29.50    8.10
   0  -8  -6   10.20    8.40
   0   8   6   24.50   10.00
   0   8  -6   26.30    8.00
   0   8  -6   33.50   11.10
   0   8   6    9.90    7.30
  -1  -8  -6   24.60    9.70
  -1   8   6   21.00    7.90
   1   8  -6   31.30    8.40
   1   8  -6    2.40    8.30
  -1   8   6   19.60    8.80
  -1   8  -6   18.40    9.70
   1  -8  -6   22.50    9.40
   1   8   6   27.90    8.60
   1   8   6   18.80    9.40
  -1   8  -6   12.60    7.30
  -2   8   6   12.30    6.20
  -2   8   6   -6.40    7.90
   2   8  -6   14.00    9.80
   2   8  -6   18.50    8.20
  -2  -8  -6  -11.60    7.90
  -2   8  -6   19.10    9.60
   2   8   6    8.70    9.10
   2   8   6   18.80    7.80
   2  -8  -6   27.80    9.60
  -2   8  -6   26.30    7.40
  -3   8   6   29.80    9.90
   3   8  -6   33.80    9.20
  -3   8   6   23.10    6.60
  -3  -8  -6   17.00   10.00
   3   8  -6   25.80    9.50
   3  -8  -6   22.90    9.10
  -3   8  -6   31.20    8.30
   3   8   6   29.90   10.10
  -3   8  -6   21.40   10.60
   4   8  -6    5.40    7.50
  -4  -8  -6    7.20    8.50
   4   8  -6   11.00    7.90
  -4   8  -6   22.60    8.00
   4  -8  -6   -4.90    6.60
  -4   8  -6   -4.70    7.40
   0   9  -6   24.50    9.10
   0   0  -7   10.80    3.90
   0   0   7   11.30    4.10
   0   0   7   19.90    4.90
   0   0   7    9.80    2.30
   0   0  -7   18.20    5.00
  -1   0   7  405.16   16.10
  -1   0  -7  417.46   12.60
   1   0  -7  427.86   16.00
   1   0  -7  403.56   15.30
   1   0  -7  403.06   16.70
  -1   0   7  430.66   16.50
  -1   0  -7  413.56   16.40
   1   0   7  408.66   12.60
   1   0   7  394.46   15.40
  -1   0  -7  405.26   15.10
   1   0   7  408.86   16.00
  -2   0  -7  348.07   12.80
   2   0   7  358.36   13.20
   2   0   7  369.36   14.60
   2   0  -7  357.86   15.10
   2   0  -7  380.46   15.00
  -2   0   7  338.07   14.60
  -2   0  -7  388.26   16.60
  -2   0   7  380.86   15.30
  -2   0   7  358.66   15.50
  -2   0  -7  357.96   14.30
  -2   0  -7  372.86   15.00
   2   0   7  337.17   14.40
  -3   0  -7    8.30    3.70
   3   0  -7   12.60    4.70
  -3   0   7   13.70    4.30
  -3   0   7   17.50    5.20
   3   0   7   16.10    4.50
   3   0   7    8.20    3.70
  -3   0   7   21.60    5.60
  -3   0  -7   20.50    4.20
  -3   0  -7   13.50    5.70
   3   0  -7    9.40    4.30
  -3   0  -7   13.30    4.20
  -3   0  -7   10.90    4.60
   4   0   7   22.90    4.10
  -4   0   7   25.70    6.50
  -4   0   7   29.70    5.20
   4   0  -7   20.90    4.80
  -4   0  -7   29.60    7.60
   4   0   7   20.50    4.70
  -4   0   7   18.10    5.60
  -4   0  -7   25.70    6.00
  -4   0  -7   22.20    2.70
  -4   0  -7   26.60    4.30
  -4   0  -7   27.00    5.60
  -5   0  -7  440.86   22.70
   5   0  -7  432.76   16.70
  -5   0  -7  424.46   19.20
  -5   0  -7  468.35   19.00
   5   0   7  441.16   15.10
  -5   0  -7  445.06   15.00
  -5   0   7  442.26   16.60
  -5   0   7  379.86   20.50
  -5   0   7  442.86   20.20
  -6   0  -7  889.81   32.60
  -6   0  -7  939.11   38.10
  -6   0   7  912.11   34.10
  -6   0   7 1008.30   36.80
  -7   0  -7   92.79   11.70
  -7   0   7   84.59   12.10
  -7   0  -7   87.19   13.80
  -7   0   7   92.29   12.50
  -8   0   7    7.80    7.50
  -8   0   7   11.90    7.90
  -8   0  -7    5.60    6.70
  -8   0  -7   14.10    9.00
   0  -1  -7  466.15   17.10
   0   1   7  454.45   17.40
   0  -1   7  468.45   16.70
   0  -1   7  455.55   17.80
   0   1   7  460.75   15.80
   0  -1  -7  474.35   15.70
   0   1   7  472.55   17.90
   0   1  -7  452.05   18.00
   0  -1  -7  457.25   18.00
   0   1  -7  463.15   16.40
  -1  -1  -7  616.54   21.00
  -1  -1  -7  617.74   21.90
  -1   1   7  603.44   21.80
  -1  -1  -7  627.84   21.40
   1   1  -7  628.14   22.10
   1   1  -7  647.94   21.60
  -1   1   7  619.14   21.70
  -1   1   7  612.24   20.40
   1   1  -7  632.64   22.20
   1  -1   7  629.34   19.90
  -1  -1  -7  612.74   19.70
   1  -1  -7  649.04   19.10
  -1   1  -7  626.64   16.30
  -1   1  -7  629.94   22.30
  -1  -1   7  634.04   22.20
  -1   1  -7  633.34   20.00
   1   1   7  627.04   21.80
  -1  -1   7  621.74   18.40
   1  -1  -7  632.54   21.40
   1  -1  -7  632.74   22.30
   1   1   7  640.84   19.90
  -1  -1   7  612.44   21.30
   1   1   7  630.24   21.70
  -2  -1  -7  713.23   23.50
  -2  -1  -7  683.73   24.50
  -2   1   7  709.33   21.90
   2  -1   7  679.93   23.30
  -2  -1  -7  693.13   22.60
   2   1  -7  704.33   24.20
  -2  -1  -7  698.43   23.80
  -2   1   7  711.43   24.00
   2   1  -7  715.03   24.20
   2  -1   7  690.43   21.60
  -2  -1  -7  675.23   24.10
   2   1  -7  733.03   24.90
  -2   1   7  679.53   23.70
   2  -1  -7  700.73   21.60
  -2  -1   7  722.63   22.50
  -2  -1   7  687.53   24.20
  -2   1  -7  685.23   23.70
  -2   1  -7  717.33   21.80
   2   1   7  715.53   22.90
   2   1   7  663.23   22.90
  -2  -1   7  714.53   25.20
  -2   1  -7  704.43   20.60
   2  -1  -7  723.53   24.50
   2   1   7  708.43   24.30
  -2  -1   7  713.33   23.90
  -3  -1  -7 1017.50   32.20
  -3  -1  -7  982.40   32.90
   3  -1   7  988.90   29.70
  -3  -1  -7  989.40   29.10
  -3   1   7 1010.60   32.40
  -3   1   7 1024.50   31.90
   3  -1   7 1031.30   31.10
   3   1  -7  979.60   31.40
  -3   1   7 1021.70   31.30
  -3  -1  -7 1018.40   34.50
  -3  -1  -7 1013.60   30.50
  -3   1  -7 1013.70   29.70
   3   1   7  982.50   32.50
  -3  -1   7 1050.89   31.50
  -3   1  -7 1010.20   31.10
  -3   1  -7  996.90   34.90
  -3   1  -7 1013.90   30.20
   3  -1  -7 1020.90   32.20
   3  -1  -7 1026.30   30.90
   3   1   7 1036.10   32.20
  -3  -1   7 1011.70   34.00
  -3   1  -7 1033.70   30.40
   3   1   7 1058.89   30.80
  -3  -1   7 1033.40   33.60
  -4  -1  -7  263.17   16.30
  -4   1   7  259.57   14.20
   4  -1   7  255.57   11.40
   4   1  -7  225.08   11.70
  -4   1   7  244.18   13.30
  -4   1   7  255.57   13.60
  -4  -1  -7  236.48   13.20
   4  -1   7  238.28   11.50
  -4  -1  -7  239.18    9.80
  -4  -1  -7  261.57   11.10
  -4  -1  -7  225.48   13.80
   4   1   7  245.38   11.00
  -4   1  -7  261.57   11.80
   4   1   7  235.78   13.40
  -4   1  -7  249.48   11.40
  -4   1  -7  234.78   15.60
   4   1   7  231.78   13.70
  -4   1  -7  257.97    7.80
  -4   1  -7  244.38   12.20
  -4  -1   7  243.28   15.20
   4  -1  -7  249.38   12.70
  -4  -1   7  246.68   12.00
  -4  -1   7  259.47   14.60
   5   1  -7    0.10    3.10
  -5   1   7    2.00    4.70
  -5   1   7    0.80    4.90
  -5  -1  -7    6.40    5.80
  -5  -1  -7   -0.50    5.40
  -5   1  -7    1.00    2.70
  -5   1  -7   -1.50    3.70
  -5  -1   7   -1.50    3.20
  -5   1  -7    1.40    3.40
  -5  -1   7    2.10    6.20
   5   1   7    2.50    4.60
  -5  -1   7    4.70    5.00
  -5   1  -7   -5.00    4.90
  -6  -1  -7   93.29   11.00
  -6   1   7   97.29   11.50
  -6   1   7  106.29   11.30
  -6  -1  -7  101.89   13.00
  -6  -1   7  109.49   12.30
  -6   1  -7   87.69   12.80
  -6   1  -7  109.29   10.00
  -6  -1   7  106.59   12.80
  -7  -1  -7  117.79   13.40
  -7   1   7  114.59   12.60
  -7   1   7  145.29   14.30
  -7  -1  -7  111.09   14.40
  -7   1  -7  113.89   15.00
  -7  -1   7  108.39   14.90
  -7   1  -7  121.89   11.50
  -7  -1   7  104.79   12.70
  -8  -1  -7   19.70    9.00
  -8  -1  -7   44.30   11.60
  -8   1   7   17.10    7.80
  -8   1   7    4.10    7.10
  -8   1  -7   26.70   10.20
  -8  -1   7   22.00    8.40
  -8  -1   7   10.90    8.30
  -8   1  -7   39.40    8.10
   0   2   7  214.98   11.00
   0   2   7  212.68   11.50
   0  -2   7  189.78    9.90
   0   2  -7  225.88   10.50
   0  -2  -7  212.88    8.30
   0  -2   7  208.08    7.60
   0  -2  -7  217.68   11.20
   0   2  -7  202.68   12.20
   0  -2  -7  184.18   11.90
   0   2  -7  210.78    7.50
  -1  -2  -7 1590.44   46.40
   1   2  -7 1579.84   45.00
   1  -2   7 1621.24   42.70
  -1   2   7 1580.94   45.60
  -1  -2  -7 1597.04   43.70
  -1  -2  -7 1507.45   45.10
   1   2  -7 1572.74   46.70
  -1   2   7 1631.34   45.70
  -1  -2  -7 1646.94   45.40
   1   2  -7 1575.24   42.20
   1   2   7 1511.65   46.00
   1  -2  -7 1636.34   39.70
  -1  -2   7 1580.64   42.30
   1   2   7 1558.24   46.20
  -1   2  -7 1589.04   40.80
   1   2   7 1608.34   45.30
   1   2   7 1565.94   43.60
   1  -2  -7 1607.34   47.00
  -1   2  -7 1605.24   42.80
  -1  -2   7 1561.04   45.00
  -1   2  -7 1550.04   46.60
  -2  -2  -7  763.62   27.20
  -2  -2  -7  776.02   25.20
  -2  -2  -7  757.72   26.00
   2   2  -7  803.42   26.70
   2   2  -7  803.82   29.20
  -2   2   7  758.72   25.60
  -2  -2  -7  744.43   25.90
  -2   2   7  764.42   26.50
  -2   2  -7  801.42   22.60
   2   2   7  789.32   27.20
   2  -2  -7  781.42   21.40
   2   2   7  793.92   26.20
   2   2   7  756.82   25.70
  -2  -2   7  694.43   27.50
  -2  -2   7  795.42   24.50
  -2   2  -7  774.92   26.70
   2   2   7  799.72   26.30
  -2  -2   7  699.13   26.00
   2  -2  -7  750.32   26.90
  -3   2   7 1371.86   41.00
  -3  -2  -7 1372.26   39.70
   3  -2   7 1320.27   36.40
  -3   2   7 1409.06   38.20
   3   2  -7 1373.86   41.20
  -3  -2  -7 1310.97   42.60
  -3  -2  -7 1388.46   43.40
  -3   2  -7 1384.66   37.10
  -3   2  -7 1404.56   37.80
   3   2   7 1381.26   40.10
  -3   2  -7 1382.86   44.60
  -3   2  -7 1327.17   37.20
   3  -2  -7 1391.96   38.10
   3   2   7 1342.87   42.80
   3   2   7 1405.66   42.40
  -3  -2   7 1415.76   44.70
  -3   2  -7 1334.67   41.00
  -3  -2   7 1373.16   42.90
  -4  -2  -7  387.96   15.40
  -4   2   7  403.36   16.30
   4   2  -7  371.66   16.20
  -4   2   7  373.86   17.30
  -4  -2  -7  376.06   19.60
  -4  -2  -7  418.86   20.00
  -4   2  -7  394.26   14.40
   4   2   7  389.66   15.70
  -4  -2   7  404.96   20.60
   4   2   7  405.66   19.00
   4   2   7  395.56   19.10
  -4  -2   7  374.06   19.10
  -4   2  -7  384.86   12.90
  -4   2  -7  420.26   14.20
   4  -2  -7  410.76   16.40
  -4   2  -7  400.56   20.60
  -4   2  -7  423.66   17.20
  -5  -2  -7  619.64   19.70
  -5   2   7  573.74   23.10
  -5  -2  -7  570.44   25.50
  -5  -2  -7  579.24   27.10
  -5   2   7  592.64   23.10
   5   2  -7  592.44   21.00
  -5  -2   7  549.25   26.70
  -5  -2   7  561.54   25.50
  -5   2  -7  564.54   27.00
   5   2   7  588.84   25.20
   5   2   7  581.04   25.00
  -5   2  -7  583.44   19.90
  -5   2  -7  586.54   21.30
  -6   2   7   10.20    5.40
  -6  -2  -7    8.00    7.20
  -6   2   7   22.70    7.10
  -6  -2  -7   16.40    8.00
  -6   2  -7    4.30    6.60
  -6  -2   7   10.80    7.40
  -6   2  -7    9.80    4.40
  -6  -2   7    9.10    6.80
  -7   2   7  145.69   12.80
  -7  -2  -7  140.89   16.80
  -7   2   7  143.59   13.50
  -7  -2  -7  137.69   14.30
  -7   2  -7  134.19   10.20
  -7   2  -7  191.48   18.30
  -7  -2   7  157.88   16.30
  -7  -2   7  182.18   15.70
  -8   2   7    9.90    7.40
  -8  -2  -7   16.40    9.60
  -8  -2  -7   11.70    8.50
  -8   2   7    7.10    6.40
  -8   2  -7   14.70    5.40
  -8  -2   7   14.50    7.90
  -8   2  -7   16.00    9.50
  -8  -2   7    9.20    9.00
   0  -3  -7  447.76   13.50
   0  -3   7  435.66   15.10
   0  -3  -7  453.95   19.30
   0   3   7  464.25   18.70
   0   3  -7  462.75   19.90
   0   3  -7  458.35   16.60
   0  -3   7  437.36   16.50
   0   3  -7  455.45   15.30
   0   3   7  439.06   18.80
  -1  -3  -7  246.88   13.50
  -1  -3  -7  246.08   13.90
   1   3  -7  280.57   13.20
   1  -3   7  276.87   10.50
  -1  -3  -7  250.17   11.30
   1   3  -7  257.07   14.40
  -1   3   7  278.57   14.60
  -1   3   7  237.28   12.70
   1   3  -7  245.48   11.20
  -1   3  -7  272.57   10.80
  -1  -3   7  273.47   13.20
  -1   3  -7  232.38   14.00
   1  -3  -7  254.27   14.00
   1   3   7  264.57   11.40
  -1   3  -7  266.47   10.70
   1   3   7  255.67   13.90
   1   3   7  249.18   13.70
  -1  -3   7  259.97   11.30
  -2   3   7   69.69    7.70
  -2  -3  -7   70.79    7.70
   2   3  -7   63.09    6.90
  -2  -3  -7   69.89    8.90
   2   3  -7   65.99    8.90
   2  -3   7   73.69    4.30
  -2  -3  -7   78.39    8.80
  -2   3   7   80.39    9.20
   2  -3  -7   72.49    8.50
  -2  -3   7   72.09    8.30
  -2  -3   7   71.69    7.10
  -2   3  -7   83.79    6.30
  -2   3  -7   93.59    9.70
   2   3   7   88.29   10.10
   2   3   7   73.69    8.20
   2   3   7   74.49    8.50
  -2   3  -7   75.29    4.90
  -3  -3  -7  298.87   16.70
  -3   3   7  281.47   16.00
  -3  -3  -7  308.37   16.30
  -3   3   7  268.87   13.90
  -3   3   7  308.07   10.50
   3   3  -7  273.77   14.30
   3   3  -7  297.37   15.40
  -3  -3  -7  285.47   14.50
  -3  -3   7  315.67   17.90
   3   3   7  301.27   17.00
  -3   3  -7  309.97   15.80
  -3  -3   7  299.97   16.00
  -3   3  -7  293.07    9.70
   3   3   7  293.77   15.80
   3  -3  -7  311.17   15.90
  -3   3  -7  290.17   14.30
  -3   3  -7  290.67    9.80
  -4  -3  -7   52.19    9.50
  -4  -3  -7   71.89    9.80
  -4   3   7   58.59    7.90
  -4   3   7   73.39    6.50
   4   3  -7   62.09    7.90
  -4  -3  -7   81.09    8.10
   4  -3  -7   69.19    6.40
  -4   3  -7   83.09    8.70
   4  -3  -7   57.29    7.90
   4   3   7   85.89   10.10
  -4   3  -7   68.79    4.40
  -4   3  -7   78.59    4.20
  -4  -3   7   81.19   11.10
  -4   3  -7   67.59    5.60
   4   3   7   74.89    9.90
  -4  -3   7   53.69    8.90
  -4   3  -7   61.99   10.10
  -5  -3  -7  183.88   11.20
  -5   3   7  188.28   11.30
   5   3  -7  192.18   11.70
  -5   3   7  177.88   12.20
  -5  -3  -7  212.18   16.50
  -5  -3  -7  182.78   14.80
  -5  -3   7  166.48   14.40
  -5  -3   7  172.68   15.60
  -5   3  -7  174.68    7.60
  -5   3  -7  194.98   15.60
   5  -3  -7  179.68   12.40
   5   3   7  174.98   14.50
   5   3   7  179.48   15.00
  -5   3  -7  204.28   12.30
  -6   3   7   70.79    9.40
  -6   3   7   76.09    8.80
  -6  -3  -7   69.39   12.50
  -6  -3  -7   61.49   10.70
  -6   3  -7   84.69   12.20
   6   3   7   98.49   13.00
  -6  -3   7   69.19   11.30
  -6   3  -7   74.39    5.90
   6  -3  -7   89.99   10.10
  -6   3  -7   56.49   11.50
  -6  -3   7   69.79   13.00
  -7  -3  -7  103.59   15.20
  -7   3   7   83.59   10.40
  -7  -3  -7  135.19   14.60
  -7   3  -7   83.99   13.20
  -7  -3   7   81.29   12.90
  -7  -3   7   85.09   14.60
  -8   3   7   19.20    7.00
  -8   3  -7   38.70   11.90
  -8  -3   7   20.20   10.70
   0  -4  -7  664.23   26.70
   0   4   7  707.03   20.10
   0   4  -7  718.73   28.10
   0  -4   7  758.62   23.60
   0   4   7  670.43   25.60
   0   4  -7  715.23   23.60
   0   4   7  725.83   27.40
   0   4  -7  693.73   23.60
   0  -4   7  721.63   23.60
   0  -4  -7  718.53   20.30
   0  -4  -7  726.63   26.20
   1   4  -7  114.29    8.50
  -1   4   7  129.19    9.40
   1   4  -7  122.59    9.30
  -1  -4  -7  114.99   10.30
  -1  -4  -7  110.09    7.70
  -1   4   7  122.89   10.70
   1   4  -7  114.19   11.50
  -1  -4  -7  123.59   11.50
   1   4   7  103.29    9.90
   1  -4  -7  104.09   10.30
   1   4   7  101.29    7.40
  -1   4  -7  102.59    7.00
  -1   4  -7  113.69    8.00
   1   4   7  123.49   10.80
  -1   4  -7  113.49   11.20
  -1  -4   7  107.29    8.60
   2  -4   7   97.19    4.20
  -2  -4  -7  113.69   10.70
   2   4  -7   83.09   10.40
   2  -4   7   79.19    4.00
  -2   4   7   82.49    9.90
  -2  -4  -7   83.69   10.10
  -2   4   7   95.49    8.60
   2   4  -7   90.89    8.60
  -2  -4  -7   92.29    8.50
  -2   4  -7   96.19    5.40
  -2  -4   7   79.69    8.80
  -2   4  -7   94.59   11.10
   2  -4  -7  113.39   10.60
   2   4   7   91.99   10.80
  -2   4  -7   91.69    7.70
   2   4   7   99.39   10.30
  -3  -4  -7   24.90    7.80
  -3   4   7   28.30    7.40
  -3  -4  -7   36.80    7.40
   3   4  -7   35.00    7.40
  -3   4   7   37.10    6.40
  -3  -4  -7   30.10    7.20
   3   4  -7   38.80    7.40
   3   4   7   38.40    8.10
  -3   4  -7   45.90    8.30
  -3   4  -7   41.20    6.50
  -3  -4   7   34.20    8.70
   3  -4  -7   33.90    7.30
   3   4   7   23.50    7.20
  -3  -4   7   26.20    6.80
  -4  -4  -7   68.69   10.90
  -4   4   7   53.39   10.00
   4   4  -7   54.39    8.40
  -4  -4  -7   56.29    9.50
  -4  -4  -7   56.89    8.80
  -4   4   7   37.30    6.80
  -4   4   7   57.19    5.20
   4   4  -7   61.59    9.90
   4   4   7   51.99    9.60
  -4  -4   7   80.29   10.70
   4  -4  -7   83.79    9.70
  -4  -4   7   72.09   11.80
  -4   4  -7   55.39   10.00
  -4   4  -7   64.89    9.40
   4   4   7   59.59   10.80
  -4   4  -7   55.79    7.70
  -5  -4  -7  203.48   13.50
  -5  -4  -7  251.47   17.70
  -5   4   7  244.28   13.50
  -5  -4  -7  235.98   18.00
   5   4  -7  253.67   14.40
  -5   4  -7  246.78   17.50
   5   4   7  226.68   17.80
  -5  -4   7  243.98   19.00
   5  -4  -7  242.18   15.20
  -5   4  -7  223.08   14.80
  -5  -4   7  255.07   18.10
   5   4   7  238.68   17.10
  -6  -4  -7  105.09   14.80
  -6   4   7  118.89   10.70
  -6  -4  -7  119.69   15.50
  -6   4  -7  112.49   11.10
   6  -4  -7   92.79   10.50
   6   4   7   99.59   13.10
  -6  -4   7   91.89   13.10
  -6  -4   7  139.39   15.90
  -6   4  -7  132.79   14.20
  -7   4   7   53.89    8.30
  -7  -4  -7   31.20   10.00
  -7  -4  -7   36.70   11.10
   7   4   7   39.00    9.90
  -7  -4   7   31.10   10.40
  -7   4  -7   58.49   12.40
  -7  -4   7   36.00   10.40
   0   5   7    3.80    5.20
   0   5   7    2.60    2.30
   0  -5  -7    2.10    5.70
   0   5  -7   -0.40    3.50
   0  -5   7    1.30    3.30
   0   5  -7   -5.40    4.90
   0   5   7    5.60    5.50
   0  -5  -7    3.90    4.80
   0   5  -7    1.70    3.70
   1   5  -7  752.52   26.90
  -1  -5  -7  771.72   29.00
  -1  -5  -7  710.33   29.20
  -1   5   7  722.23   26.90
   1   5  -7  766.72   26.90
  -1  -5  -7  769.32   24.50
   1   5  -7  766.02   30.60
  -1   5   7  696.63   29.60
   1   5   7  741.53   30.20
  -1   5  -7  726.83   23.70
  -1   5  -7  709.73   30.40
   1   5   7  739.83   29.00
  -1   5  -7  737.43   25.90
   1   5   7  732.83   24.10
   1  -5  -7  757.52   27.10
  -1  -5   7  730.63   26.50
   1  -5  -7  728.53   29.50
  -2   5   7   90.79   11.10
  -2  -5  -7   88.89   10.80
   2   5  -7  104.99   12.30
  -2  -5  -7   98.59    9.10
  -2  -5  -7   89.59   12.10
   2   5  -7  101.89    9.90
  -2   5   7  110.59    9.70
   2  -5  -7   88.99    8.80
  -2   5  -7   86.99   12.60
  -2   5  -7   96.19    9.00
  -2  -5   7   95.09    9.70
   2  -5  -7  108.79   12.40
   2   5   7   90.49   11.20
  -2   5  -7   97.99    6.00
   2   5   7   91.09   11.20
   3   5  -7  255.17   15.70
   3   5  -7  266.47   17.10
  -3  -5  -7  277.17   16.60
  -3   5   7  248.48   13.70
  -3   5   7  273.27   18.40
  -3  -5  -7  267.77   15.70
  -3  -5  -7  260.87   17.40
   3  -5  -7  280.37   16.70
   3   5   7  268.57   17.50
   3   5   7  243.98   17.00
  -3  -5   7  219.98   15.90
  -3   5  -7  242.78   14.20
  -3   5  -7  310.27   18.60
  -4  -5  -7    3.80    6.30
   4   5  -7   18.80    7.10
  -4  -5  -7   16.30    8.20
  -4  -5  -7    5.20    5.90
  -4   5   7   11.70    5.20
  -4   5   7   22.90    8.10
   4   5  -7   21.30    6.90
  -4  -5   7   19.80    8.70
  -4   5  -7   10.30    6.60
  -4   5  -7   10.70    5.30
  -4   5  -7   16.90    7.40
  -4  -5   7    7.10    6.20
   4   5   7   14.30    7.30
   4  -5  -7   18.10    7.50
   4   5   7   14.30    8.10
  -5  -5  -7  189.68   16.80
  -5   5   7  204.68   17.20
  -5   5   7  171.28   11.70
   5   5  -7  217.28   14.40
  -5  -5  -7  186.28   16.40
  -5  -5  -7  172.28   13.70
   5   5  -7  193.18   15.70
   5   5   7  201.78   17.40
  -5   5  -7  183.28   14.30
  -5   5  -7  183.88   13.90
  -5   5  -7  190.28   15.70
   5  -5  -7  210.08   15.20
  -5  -5   7  173.08   15.60
   5   5   7  200.28   17.60
  -5  -5   7  163.78   16.90
  -6   5   7   38.60    6.90
  -6   5   7   32.90   10.10
  -6  -5  -7   31.40    9.60
  -6  -5  -7   26.90   10.30
   6   5   7   27.60    9.20
  -6   5  -7   34.90    8.20
  -6   5  -7    7.40    7.00
  -6   5  -7   22.80    8.40
  -6  -5   7   35.50   10.80
  -6  -5   7   38.30   10.70
   6  -5  -7   21.90    8.30
  -7  -5  -7  109.89   16.10
  -7  -5  -7  105.49   23.30
  -7   5   7   91.29    9.80
  -7   5  -7   82.89   12.60
  -7  -5   7   66.39   13.80
   0   6   7  251.87   16.40
   0   6   7  254.87   17.50
   0  -6  -7  263.97   15.70
   0  -6  -7  260.37   17.60
   0   6  -7  266.17   15.00
   0   6  -7  246.78   18.30
  -1  -6  -7   23.90    8.50
  -1  -6  -7   25.50    7.70
  -1   6   7   20.70    6.60
  -1  -6  -7   10.70    4.20
  -1   6   7   11.50    7.30
   1   6  -7   19.10    6.20
   1   6  -7   21.20    8.30
   1   6   7   15.10    7.60
   1   6   7    8.40    6.70
  -1   6  -7   17.10    7.80
  -1   6  -7   11.20    5.10
   1  -6  -7   29.30    8.50
  -2  -6  -7   86.19   12.30
  -2  -6  -7   76.19   11.70
  -2   6   7   77.99    9.80
   2   6  -7  113.19   13.10
   2   6  -7   96.79   10.80
  -2  -6  -7   87.99    9.30
  -2   6   7   84.99   12.80
  -2   6  -7  128.59   15.10
  -2   6  -7   91.19    9.60
   2   6   7  103.99   12.10
   2  -6  -7  103.29   12.20
   2   6   7   90.19   12.10
  -2  -6   7   81.39   10.20
  -3  -6  -7    8.40    6.70
  -3   6   7    3.40    6.30
  -3   6   7    4.10    4.80
   3   6  -7    4.50    6.80
   3   6  -7   -3.70    4.90
  -3  -6  -7    4.30    5.10
  -3  -6  -7    7.40    7.80
   3   6   7    2.10    6.40
  -3   6  -7   -1.40    4.20
  -3   6  -7   12.10    7.30
   3  -6  -7    4.50    6.20
   3   6   7    7.40    7.10
  -3  -6   7    6.90    6.10
  -4  -6  -7  135.09   14.30
  -4   6   7  148.69   11.20
   4   6  -7  170.88   14.00
  -4   6   7  144.29   15.20
  -4  -6  -7  141.29   13.80
   4   6  -7  145.39   14.30
  -4  -6  -7  156.28   15.20
  -4   6  -7  143.19   14.00
   4   6   7  150.28   15.10
  -4   6  -7  136.19   13.30
  -4  -6   7  141.39   14.70
   4   6   7  112.49   14.00
  -4   6  -7  161.08   12.70
   4  -6  -7  172.38   15.10
   5   6  -7   34.10    8.40
  -5   6   7   20.30    5.80
  -5  -6  -7   20.50    8.20
   5   6  -7   12.20    7.20
  -5  -6  -7    8.00    7.80
  -5   6   7   13.40    8.10
  -5  -6  -7   13.70    8.30
  -5   6  -7   22.30    7.10
  -5  -6   7   31.10    9.00
   5   6   7   17.10    9.00
  -5   6  -7    9.80    7.20
  -5   6  -7   10.90    6.70
   5  -6  -7   23.40    7.70
  -5  -6   7   15.50   10.10
  -6   6   7  135.49   18.30
  -6  -6  -7  157.68   16.30
  -6   6   7  162.88   11.30
  -6  -6   7  157.48   17.30
  -6  -6   7  130.49   17.60
  -6   6  -7  143.49   13.70
  -6   6  -7  184.48   16.60
   6   6   7  108.59   15.00
   0   7  -7   47.10   11.90
   0  -7  -7   30.80    9.30
   0   7  -7   40.70    8.40
   0   7   7   56.09   10.80
   0   7   7   18.90    7.30
  -1   7   7   76.39   10.50
  -1   7   7   60.49   12.00
   1   7  -7   54.69   11.40
  -1  -7  -7   85.69   12.90
   1   7  -7   67.29   10.40
  -1   7  -7   71.99   12.80
   1   7   7   64.19   12.40
  -1   7  -7   70.69   10.00
   1   7   7   76.69   11.20
   1  -7  -7   66.39   11.70
  -2  -7  -7   94.09   12.20
   2   7  -7  111.89   12.00
   2   7  -7  108.99   14.00
  -2   7   7  108.29   11.70
  -2  -7  -7   93.29   13.60
  -2   7   7  114.69   14.10
  -2   7  -7   95.29   14.30
   2  -7  -7  127.19   14.30
   2   7   7   97.99   12.70
  -2   7  -7  125.39   11.50
   2   7   7   94.39   14.10
  -3   7   7   15.60    6.30
  -3  -7  -7   27.40    8.50
  -3   7   7   31.10   10.40
   3   7  -7   21.00    8.00
  -3  -7  -7   11.10    7.90
   3   7  -7   28.00    9.00
  -3   7  -7   24.70    9.90
   3   7   7   31.20    9.50
   3  -7  -7   39.20   10.80
  -3   7  -7   15.00    7.00
   3   7   7   23.90    8.90
  -4  -7  -7   -9.60    7.00
   4   7  -7   -4.00    6.50
  -4   7   7    5.50    7.60
  -4   7   7    5.00    5.00
  -4  -7  -7    2.00    7.10
   4   7  -7    2.10    7.50
  -4  -7  -7    1.40    7.00
   4  -7  -7   -9.80    5.50
   4   7   7    5.70    7.40
   4   7   7    4.60    7.80
  -4   7  -7    4.70    5.60
  -4   7  -7   -5.10    6.20
  -4   7  -7    3.20    6.10
  -5  -7  -7   51.49   11.30
  -5  -7  -7   38.90   10.80
   5   7  -7   53.09   10.70
  -5  -7  -7   70.99   12.40
   5  -7  -7   91.59   13.30
  -5   7  -7   65.99   11.80
  -5   7  -7   68.89   12.20
  -5   7  -7   62.19   10.70
   0   8   7   47.40    9.90
   0   8   7   35.10   11.20
   0  -8  -7   43.20   10.90
   0   8  -7   24.00   10.30
   0   8  -7   35.00    8.40
   1   8  -7  252.87   17.70
  -1   8   7  297.57   17.80
  -1  -8  -7  274.57   20.90
   1   8  -7  270.47   22.40
  -1   8   7  240.88   19.60
   1   8   7  277.17   19.30
  -1   8  -7  294.27   18.20
  -1   8  -7  243.68   22.30
   1   8   7  246.28   19.90
   1  -8  -7  245.58   19.60
  -2   8   7   16.20    9.70
  -2   8   7   17.90    6.90
   2   8  -7    6.90    6.70
  -2  -8  -7    8.50    8.30
   2   8  -7   18.40    8.80
   2  -8  -7   12.10    9.50
   2   8   7    8.10    7.80
  -2   8  -7   13.50    9.20
  -2   8  -7   11.80    6.70
   2   8   7   19.10    8.10
  -3  -8  -7   32.00   10.00
  -3   8   7   57.59    8.90
   3   8  -7   56.79   12.10
   3   8  -7   55.99   10.90
  -3   8   7   41.60   16.90
  -3   8  -7   49.20   10.50
  -3   8  -7   38.60   11.20
   3  -8  -7   47.00   11.10
   0   0  -8 2532.25   69.29
   0   0  -8 2568.54   67.99
   0   0   8 2560.24   68.09
   0   0   8 2546.65   63.89
  -1   0   8  551.84   20.60
   1   0  -8  545.95   20.20
  -1   0   8  501.35   19.30
  -1   0  -8  505.15   19.70
  -1   0  -8  553.44   15.70
   1   0  -8  542.15   19.10
  -1   0  -8  520.35   18.70
   1   0   8  537.15   19.10
   1   0  -8  525.85   19.40
   1   0   8  520.35   15.60
  -2   0  -8  329.47   14.80
  -2   0   8  357.36   15.50
  -2   0  -8  328.77   15.80
   2   0   8  320.87   14.20
  -2   0  -8  343.07   14.00
   2   0   8  315.07   12.30
   2   0  -8  323.67   14.90
   2   0  -8  337.77   14.60
  -2   0   8  312.97   14.90
  -2   0  -8  339.47   12.20
   2   0   8  359.66   14.90
  -3   0  -8  688.03   22.70
   3   0  -8  662.43   23.40
  -3   0  -8  619.14   21.80
  -3   0   8  628.54   24.40
  -3   0  -8  660.13   23.30
  -3   0   8  677.33   24.30
   3   0   8  667.33   22.50
  -3   0   8  716.03   26.00
   3   0   8  679.23   23.30
  -3   0  -8  634.24   22.50
  -3   0  -8  661.03   26.00
  -4   0  -8  731.63   23.70
  -4   0  -8  731.33   20.60
  -4   0  -8  706.73   25.90
   4   0   8  731.43   23.60
  -4   0  -8  737.33   25.40
  -4   0   8  702.03   27.00
  -4   0   8  704.43   27.00
   4   0  -8  765.02   25.30
   4   0   8  695.13   25.10
  -4   0  -8  741.73   29.40
  -5   0   8   -1.90    5.30
   5   0  -8    5.90    3.90
  -5   0  -8    0.40    4.10
  -5   0  -8    2.10    5.80
  -5   0  -8    5.70    3.20
  -5   0  -8   -2.70    4.20
  -5   0   8   -3.40    4.40
   5   0   8    4.50    4.10
  -6   0  -8  158.08   13.10
  -6   0  -8  166.18   15.80
  -6   0   8  172.98   15.00
  -6   0   8  174.88   13.70
  -7   0   8    3.90    6.70
  -7   0   8    0.90    6.80
  -7   0  -8    7.80    8.00
  -7   0  -8   -1.70    6.00
  -8   0   8   61.09   12.40
  -8   0  -8   66.49   10.50
  -8   0  -8   44.30   11.40
  -8   0   8   51.59   10.70
   0   1   8   30.00    5.50
   0   1   8   19.40    5.30
   0  -1   8   23.50    4.80
   0  -1  -8   25.80    5.20
   0  -1  -8   32.50    6.30
   0   1  -8   27.20    5.90
   0   1  -8   22.00    4.50
   0  -1  -8   24.20    4.10
   0  -1   8   35.50    6.00
   0   1   8   23.00    4.20
  -1  -1  -8   39.10    5.10
   1   1  -8   48.00    7.10
   1   1  -8   47.30    6.60
  -1  -1  -8   36.30    6.60
   1  -1   8   47.50    6.70
  -1   1   8   26.30    5.50
  -1   1   8   40.40    5.80
  -1  -1  -8   44.50    6.20
  -1  -1  -8   41.90    6.10
   1   1  -8   43.20    7.20
   1  -1   8   40.50    5.70
  -1   1  -8   35.30    5.10
   1   1   8   26.10    5.50
   1  -1  -8   26.90    4.20
   1   1   8   40.40    6.60
   1   1   8   27.20    4.50
  -1   1  -8   37.60    6.30
  -1  -1   8   36.40    4.10
  -1  -1   8   23.50    5.50
   1  -1  -8   31.80    6.00
  -1  -1   8   39.90    6.30
  -2   1   8  543.15   20.70
   2  -1   8  549.54   18.60
  -2  -1  -8  531.05   20.70
  -2  -1  -8  571.04   20.60
  -2  -1  -8  559.04   20.40
  -2  -1  -8  568.04   21.40
   2   1  -8  540.75   20.90
  -2  -1  -8  549.54   19.10
   2  -1   8  534.05   20.40
   2  -1  -8  538.75   20.90
   2  -1  -8  556.54   18.20
  -2   1  -8  570.14   16.80
  -2   1  -8  554.54   18.60
  -2  -1   8  538.15   18.70
   2   1   8  567.94   21.00
   2   1   8  536.85   19.10
  -2  -1   8  515.25   20.80
  -2   1  -8  567.84   20.90
   2   1   8  535.35   20.10
  -3  -1  -8  702.73   26.00
   3  -1   8  723.43   24.20
  -3  -1  -8  713.03   22.50
  -3  -1  -8  742.83   24.20
  -3  -1  -8  729.53   27.20
   3  -1   8  719.63   22.90
   3   1  -8  744.73   25.20
  -3   1   8  748.13   25.80
  -3   1   8  736.93   24.20
  -3  -1  -8  701.13   25.30
  -3   1  -8  668.83   27.20
   3   1   8  700.53   23.80
   3   1   8  676.43   24.20
  -3   1  -8  726.13   22.70
  -3   1  -8  696.03   23.40
  -3   1  -8  708.33   22.90
   3  -1  -8  710.83   25.20
  -3   1  -8  702.53   24.50
   3   1   8  697.73   25.80
  -3  -1   8  701.63   26.20
  -3  -1   8  653.93   26.20
   3  -1  -8  722.43   23.60
  -4  -1  -8   57.89    9.70
  -4  -1  -8   68.29    6.70
   4   1  -8   77.59    7.50
  -4   1   8   74.79    8.20
  -4  -1  -8   71.49    9.40
  -4  -1  -8   63.59    5.60
   4  -1   8   73.89    6.80
  -4   1   8   61.59    8.10
   4  -1   8   63.99    7.00
   4   1   8   75.39    8.90
  -4   1  -8   62.59    6.60
  -4   1  -8   69.79    6.40
   4  -1  -8   87.59    8.50
  -4  -1   8   69.29    9.10
  -4  -1   8   72.99    9.50
   4   1   8   72.99    8.80
  -4   1  -8   69.79    7.30
   4   1   8   67.89    6.70
  -4   1  -8   62.79   10.00
   5   1  -8  113.39    8.70
  -5  -1  -8  123.79   13.30
  -5  -1  -8  116.99    6.10
  -5  -1  -8  124.39   11.30
  -5   1   8  143.49   11.70
  -5   1   8  134.29   11.70
  -5   1  -8  110.19    7.90
  -5  -1   8  109.89   13.00
  -5   1  -8  126.89    9.70
   5   1   8  109.99   10.10
  -5  -1   8   93.59   11.00
  -5   1  -8  116.69   12.80
  -6  -1  -8   29.20    8.90
  -6   1   8   27.70    7.60
  -6   1   8   21.20    7.40
  -6  -1  -8   24.70    7.00
  -6  -1   8   21.10    8.00
  -6   1  -8   20.70    6.20
  -6   1  -8   18.70    8.10
  -6  -1   8   19.60    8.70
  -7   1   8  123.59   13.70
  -7  -1  -8  133.09   14.00
  -7   1   8  128.69   12.70
  -7  -1  -8  153.98   16.30
  -7  -1   8  144.59   15.10
  -7   1  -8  143.29   11.90
  -7   1  -8  137.89   16.10
  -7  -1   8  121.69   15.50
  -8  -1  -8   18.50    8.80
  -8   1   8   11.50    7.60
  -8   1   8   25.20    9.60
  -8  -1  -8   12.70    8.30
  -8   1  -8   22.10    6.70
  -8  -1   8   -0.60    8.20
  -8   1  -8   23.60   10.20
  -8  -1   8   -1.00    7.20
   0   2  -8   83.39    4.00
   0   2   8   72.29    7.10
   0  -2   8   79.39    4.00
   0   2  -8   79.59    7.10
   0  -2  -8   77.89    5.60
   0   2   8   84.39    8.20
   0  -2   8   73.29    7.00
   0  -2  -8   70.09    7.20
   0  -2  -8   87.19    8.90
   0   2  -8   74.59    8.60
   1   2  -8 1045.10   34.50
  -1   2   8 1094.29   33.40
  -1   2   8 1037.60   33.40
   1   2  -8 1089.99   33.20
  -1  -2  -8 1116.49   34.90
  -1  -2  -8 1036.20   33.50
  -1  -2  -8 1088.29   32.80
  -1  -2  -8 1056.19   31.70
   1  -2   8 1086.49   30.90
   1  -2  -8 1049.59   35.10
  -1   2  -8 1094.29   35.20
   1  -2  -8 1090.69   28.20
  -1  -2   8 1069.89   33.40
  -1   2  -8 1077.29   31.10
  -1   2  -8 1069.89   27.90
   1   2   8 1037.10   32.90
   1   2   8 1037.30   34.00
  -1  -2   8 1085.79   29.70
  -2  -2  -8  871.41   29.50
   2  -2   8  921.61   26.20
  -2  -2  -8  927.01   30.20
  -2  -2  -8  882.81   28.80
  -2  -2  -8  875.51   30.70
  -2   2   8  917.61   29.90
  -2   2   8  950.30   30.40
   2   2  -8  951.50   30.70
  -2   2  -8  880.91   30.50
  -2   2  -8  888.01   26.30
   2   2   8  959.50   32.30
   2  -2  -8  904.11   24.90
  -2  -2   8  920.11   27.70
   2  -2  -8  853.31   30.50
  -2  -2   8  889.21   30.00
   2   2   8  901.81   30.60
   2   2   8  832.82   28.90
  -3  -2  -8  372.26   15.40
  -3  -2  -8  356.76   18.20
  -3   2   8  325.77   16.20
  -3   2   8  364.06   13.80
   3   2  -8  362.06   16.60
  -3  -2  -8  388.96   18.10
  -3   2  -8  360.96   13.50
   3  -2  -8  388.06   13.90
  -3   2  -8  355.06   13.10
   3   2   8  391.56   17.40
   3   2   8  337.77   17.40
  -3   2  -8  372.16   19.10
  -3   2  -8  361.66   16.60
  -3  -2   8  342.37   18.40
  -3  -2   8  357.36   17.50
  -4   2   8  126.29    8.90
  -4  -2  -8  121.69   11.50
   4  -2   8  107.09    6.10
  -4  -2  -8  110.99   11.70
  -4  -2  -8  104.29    8.00
  -4   2   8  111.49   10.10
   4   2  -8  118.49    9.30
   4   2   8  106.89    8.50
  -4  -2   8   99.29   12.10
  -4   2  -8  112.79    9.10
  -4   2  -8  112.29    6.30
  -4   2  -8  112.59    7.00
   4  -2  -8  102.39    8.20
  -4  -2   8  115.79   10.80
  -4   2  -8   86.19   11.10
  -4   2  -8   99.49    7.40
   4   2   8   88.69    9.90
   4   2   8  104.19    9.90
  -5  -2  -8   78.39   10.80
  -5   2   8   90.29    9.40
   5   2  -8   74.39    7.70
  -5  -2  -8   89.19   11.60
  -5   2   8   72.99    9.80
  -5  -2  -8   79.89    7.10
   5   2   8   91.69   11.10
  -5   2  -8   55.99   10.80
   5   2   8   90.69   10.30
  -5   2  -8   58.59    6.90
  -5  -2   8   68.99   10.20
  -5  -2   8   62.99   10.90
  -5   2  -8   70.59    7.60
  -6   2   8   49.00    8.50
  -6  -2  -8   50.49    9.50
  -6   2   8   64.39    9.40
  -6  -2  -8   50.09   10.90
  -6  -2   8   42.80   10.60
  -6   2  -8   53.59    7.30
  -6   2  -8   45.30   10.70
  -6  -2   8   57.39   10.10
  -7  -2  -8   12.10    7.40
  -7   2   8    6.40    5.80
  -7   2   8   19.50    7.50
  -7  -2  -8   19.10    9.00
  -7   2  -8   21.30    5.60
  -7   2  -8    9.00    9.10
  -7  -2   8   17.90   10.10
  -7  -2   8   11.30    8.00
  -8  -2  -8   19.60   10.00
  -8   2   8   24.60    7.90
  -8  -2  -8   52.29   11.50
  -8   2  -8   36.60   11.40
  -8  -2   8   27.90   10.40
  -8   2  -8   39.00    6.90
  -8  -2   8   49.00   13.00
   0  -3  -8   61.79    8.70
   0  -3   8   69.69    6.80
   0   3   8   59.49    7.70
   0  -3  -8   47.00    4.10
   0  -3   8   48.80    4.90
   0   3   8   43.20    7.00
   0   3  -8   61.39    6.40
   0   3  -8   55.89    8.40
   0   3  -8   57.29    4.90
   1   3  -8  170.18   10.60
   1   3  -8  156.18   11.80
  -1   3   8  158.48   11.10
  -1  -3  -8  167.88    9.00
   1   3  -8  154.28    8.70
  -1   3   8  140.99   10.80
  -1  -3  -8  175.78   11.90
  -1  -3  -8  160.98   11.80
   1  -3   8  166.28    8.50
   1   3   8  164.68    8.90
  -1   3  -8  173.28   12.40
   1  -3  -8  164.68   11.70
  -1   3  -8  171.38    7.80
  -1   3  -8  162.38    8.70
   1   3   8  193.68   11.80
   1   3   8  188.88   11.90
  -1  -3   8  169.38   10.80
  -1  -3   8  174.58    8.80
   2   3  -8  382.46   15.40
  -2   3   8  369.76   16.40
  -2  -3  -8  349.57   17.90
  -2  -3  -8  370.26   17.10
   2   3  -8  354.86   17.50
  -2   3   8  344.27   17.20
  -2  -3  -8  363.06   16.00
   2  -3   8  354.96   12.10
   2  -3  -8  393.06   17.80
  -2  -3   8  359.46   17.10
  -2   3  -8  346.27   12.60
  -2   3  -8  364.86   18.20
  -2   3  -8  372.16   13.70
   2   3   8  359.96   17.80
  -2  -3   8  385.46   15.30
   2   3   8  356.06   17.20
  -3  -3  -8    5.30    5.10
  -3  -3  -8    2.40    4.00
  -3   3   8    6.90    4.60
   3   3  -8    5.60    5.20
  -3  -3  -8    7.90    5.60
  -3   3   8    9.20    2.50
   3  -3   8    8.30    1.90
  -3   3   8    9.30    5.90
   3  -3  -8    4.40    5.40
  -3  -3   8    6.80    6.10
   3  -3  -8   11.10    2.60
   3   3   8    4.20    5.20
  -3   3  -8    7.80    4.40
   3   3   8   16.30    6.20
  -3   3  -8   10.60    2.50
  -3  -3   8    7.30    5.30
  -4   3   8  158.78    8.90
  -4  -3  -8  154.58   10.80
   4   3  -8  160.68   11.50
  -4  -3  -8  127.69   12.90
  -4   3   8  167.48   11.60
  -4  -3  -8  165.28   13.10
   4   3   8  152.68   13.30
  -4   3  -8  152.68    6.80
  -4   3  -8  157.48   11.70
  -4   3  -8  160.38    7.20
  -4   3  -8  177.48   14.70
  -4   3  -8  167.28    8.90
   4  -3  -8  159.28   12.00
  -4  -3   8  164.18   14.60
  -4  -3   8  183.18   13.80
   4   3   8  164.48   13.50
  -5   3   8  216.08   13.60
  -5   3   8  207.28   12.20
  -5  -3  -8  239.08   16.80
  -5  -3  -8  223.48   12.40
  -5  -3  -8  239.98   16.80
   5   3  -8  233.08   13.40
   5  -3  -8  217.88   14.00
  -5   3  -8  226.08   17.70
  -5  -3   8  205.28   16.60
  -5   3  -8  216.58    9.00
   5   3   8  205.88   15.60
  -5  -3   8  207.38   17.20
  -5   3  -8  224.08   13.60
   5   3   8  202.68   15.20
  -6   3   8  124.89   11.40
  -6  -3  -8  134.29   14.70
  -6  -3  -8  130.69   13.90
  -6   3   8  125.79   11.20
   6  -3  -8  132.19   11.30
   6   3   8  131.89   13.50
  -6  -3   8  127.99   14.00
  -6   3  -8  138.49   14.90
  -6   3  -8  133.79    7.60
  -6  -3   8  109.89   14.70
  -7  -3  -8    6.00    7.00
  -7  -3  -8   12.60    7.90
  -7   3   8   -0.80    5.50
  -7   3  -8   16.70    8.50
  -7  -3   8   17.10    8.50
  -7  -3   8   23.50    9.60
  -8   3   8  139.49   13.40
  -8   3  -8  144.89   18.00
   0  -4  -8  122.99   11.00
   0  -4   8  110.49    7.90
   0  -4  -8  143.09   11.70
   0  -4  -8  121.79    5.60
   0   4  -8  115.59    8.30
   0   4  -8  105.99   11.10
   0  -4   8  120.49    8.60
   0   4  -8  121.29    8.00
   0   4   8   98.99    9.70
   0   4   8  119.89   11.30
  -1   4   8  474.85   21.70
  -1  -4  -8  505.05   21.80
   1   4  -8  501.75   20.00
   1   4  -8  499.55   18.50
  -1  -4  -8  502.55   17.60
   1   4  -8  468.95   22.20
   1  -4   8  485.85   16.70
  -1   4   8  472.45   20.50
  -1  -4  -8  460.85   21.20
   1  -4  -8  510.05   22.10
  -1   4  -8  488.75   22.70
  -1  -4   8  540.65   21.00
   1   4   8  458.85   21.50
   1   4   8  473.75   21.70
  -1  -4   8  519.65   20.10
   1   4   8  501.45   17.50
  -1   4  -8  504.95   17.80
  -1   4  -8  501.55   17.40
  -2   4   8  284.97   16.40
   2   4  -8  277.67   16.20
  -2   4   8  267.47   14.30
   2   4  -8  273.97   13.60
  -2  -4  -8  276.27   15.60
   2  -4   8  266.37    9.20
  -2  -4  -8  265.17   13.60
  -2  -4  -8  245.08   15.60
  -2   4  -8  268.97   16.40
   2   4   8  281.37   16.20
   2  -4  -8  255.07   15.50
  -2  -4   8  266.27   14.80
   2   4   8  264.87   16.20
  -2   4  -8  264.57   10.30
  -2   4  -8  260.57   12.30
  -3   4   8  374.06   19.60
  -3   4   8  363.96   16.90
   3   4  -8  371.86   19.00
  -3  -4  -8  389.86   18.70
   3   4  -8  336.67   17.00
  -3  -4  -8  370.56   19.90
  -3  -4  -8  362.96   17.70
  -3   4  -8  340.87   15.40
  -3   4  -8  343.37   10.60
   3   4   8  350.76   19.40
   3  -4  -8  331.07   18.60
  -3  -4   8  342.87   18.40
  -3   4  -8  357.16   18.60
   3   4   8  341.47   18.70
   4   4  -8  200.28   13.50
  -4  -4  -8  212.98   14.80
  -4   4   8  221.58   16.00
  -4  -4  -8  208.78   16.00
  -4  -4  -8  187.38   13.20
  -4   4   8  212.68   12.80
   4   4  -8  216.78   14.30
  -4   4  -8  197.78   12.30
   4   4   8  178.68   14.90
  -4  -4   8  237.58   15.90
  -4  -4   8  192.88   17.20
   4  -4  -8  199.88   14.70
  -4   4  -8  151.08   13.30
  -4   4  -8  192.58   15.30
   4   4   8  190.68   14.80
  -5   4   8  235.28   14.00
  -5  -4  -8  211.98   13.90
  -5   4   8  214.38   16.80
   5   4  -8  225.48   14.10
  -5  -4  -8  203.18   16.80
  -5  -4  -8  222.48   16.70
   5   4   8  218.78   17.60
  -5   4  -8  226.68   14.80
   5   4   8  233.58   17.70
  -5  -4   8  208.78   16.30
  -5  -4   8  239.38   18.90
   5  -4  -8  232.68   15.40
  -5   4  -8  235.58   17.50
  -6   4   8   17.50    6.50
  -6  -4  -8   21.90    9.60
  -6  -4  -8   18.20    8.50
  -6  -4   8   17.80    8.70
  -6   4  -8   18.90    9.40
  -6   4  -8   24.10    9.30
   6  -4  -8   17.70    6.60
  -6  -4   8    9.00    8.30
   6   4   8   17.30    8.50
  -7  -4  -8  129.79   16.00
  -7  -4  -8  143.19   16.10
  -7   4   8  147.29   12.40
  -7  -4   8  131.29   15.60
  -7  -4   8  123.99   16.90
  -7   4  -8  127.99   16.40
   7   4   8  137.39   14.90
   0  -5  -8  536.15   23.10
   0   5  -8  528.95   20.30
   0   5   8  537.85   15.80
   0   5   8  526.85   23.30
   0   5   8  497.25   24.20
   0  -5   8  547.55   20.00
   0   5  -8  524.15   20.60
   0  -5  -8  538.05   24.50
   0   5  -8  548.35   25.60
   1   5  -8  183.48   14.70
   1   5  -8  194.28   12.30
   1   5  -8  198.58   11.80
  -1   5   8  167.88   12.00
  -1  -5  -8  180.88   14.10
  -1  -5  -8  174.08    9.80
  -1   5   8  160.58   14.60
  -1  -5  -8  182.18   14.20
  -1   5  -8  181.78   10.70
  -1   5  -8  164.18   10.80
  -1   5  -8  176.28   14.90
  -1  -5   8  170.58   11.40
   1  -5  -8  172.08   14.60
   1   5   8  169.58   14.20
   1   5   8  198.98   14.80
   1   5   8  175.68    9.70
   1  -5  -8  153.98   12.10
  -2  -5  -8   20.10    7.10
  -2   5   8   18.80    5.80
   2   5  -8   23.70    6.20
  -2  -5  -8   30.70    6.30
   2   5  -8   27.10    8.20
  -2   5   8   23.00    7.60
  -2  -5  -8   15.30    7.10
  -2  -5   8   20.00    6.60
   2  -5  -8   24.90    5.90
   2  -5  -8   17.90    7.30
   2   5   8   24.50    7.80
  -2   5  -8   10.40    6.80
   2   5   8   18.60    7.30
  -2   5  -8   17.10    5.00
  -3  -5  -8   37.40    7.50
  -3  -5  -8   37.90    9.10
  -3   5   8   31.60    6.70
   3   5  -8   29.20    7.20
  -3  -5  -8   47.30   10.10
   3   5  -8   25.30    8.30
  -3   5   8   25.40    8.80
  -3   5  -8   53.19    9.70
   3  -5  -8   25.50    8.00
  -3   5  -8   46.80    7.40
   3   5   8   26.50    7.90
   3   5   8   38.00    8.80
  -3  -5   8   35.50    8.60
  -4  -5  -8  420.46   21.50
  -4   5   8  391.76   18.30
  -4   5   8  403.76   22.60
  -4  -5  -8  428.56   21.90
  -4  -5  -8  363.26   22.80
   4   5  -8  420.56   21.40
   4   5  -8  475.65   21.70
   4   5   8  404.36   22.80
  -4  -5   8  424.66   24.50
   4   5   8  439.76   23.50
  -4   5  -8  402.06   19.00
  -4  -5   8  412.36   22.10
  -4   5  -8  437.86   22.30
  -4   5  -8  372.66   22.30
   4  -5  -8  380.16   21.20
  -5   5   8   11.60    5.50
  -5  -5  -8    4.30    6.80
  -5  -5  -8   -0.10    5.20
  -5  -5  -8    4.90    8.30
  -5   5   8   -2.10    6.60
   5   5  -8   14.00    6.20
  -5  -5   8    4.20    7.50
   5  -5  -8    7.30    6.70
  -5   5  -8    3.10    5.80
  -5  -5   8    2.90    6.40
   5   5   8    6.30    7.50
  -5   5  -8   11.80    5.80
  -5   5  -8    7.40    7.50
   5   5   8   10.80    7.50
  -6  -5  -8   43.90   11.10
  -6   5   8   39.50    7.30
  -6  -5  -8   34.30   10.50
  -6   5   8   19.40    9.40
  -6  -5   8   19.80    9.00
  -6   5  -8   26.90    8.70
  -6   5  -8   37.20    8.60
   6  -5  -8   51.59    9.50
  -6  -5   8   23.70   10.40
   6   5   8   43.30   10.90
  -7   5   8   25.30    6.70
  -7  -5  -8   22.10   10.10
  -7  -5   8    9.90    8.30
  -7   5  -8   26.50    8.90
  -7   5  -8   37.30    8.90
   0   6   8  353.56   19.20
   0  -6  -8  360.46   20.90
   0   6  -8  396.36   18.10
   0   6  -8  348.57   21.60
   0  -6  -8  360.36   18.70
   0   6   8  335.07   21.00
  -1   6   8  148.79   12.70
   1   6  -8  145.89   14.60
  -1  -6  -8  140.79   15.10
   1   6  -8  132.89   11.70
  -1  -6  -8  142.49   12.90
  -1   6   8  145.89   14.00
   1   6   8  163.08   14.40
   1   6   8  139.09   14.20
   1  -6  -8  136.69   13.80
  -1   6  -8  119.19   15.30
  -1   6  -8  143.19   11.20
  -2  -6  -8  203.28   15.60
  -2   6   8  201.18   13.70
   2   6  -8  206.68   17.00
  -2   6   8  211.48   16.70
  -2  -6  -8  205.48   12.70
  -2  -6  -8  166.58   15.40
   2   6  -8  203.78   14.10
  -2  -6   8  196.68   14.40
   2   6   8  194.88   16.10
  -2   6  -8  202.58   12.80
   2   6   8  203.98   15.60
  -2   6  -8  203.18   16.90
   2  -6  -8  201.28   16.10
  -3  -6  -8    2.00    6.60
  -3   6   8    4.40    5.30
  -3  -6  -8    5.50    7.50
  -3   6   8   14.80    8.10
   3   6  -8   -0.10    5.40
  -3  -6  -8    0.70    5.20
   3   6  -8   16.30    7.90
  -3   6  -8   10.60    7.50
   3   6   8    7.20    6.70
   3   6   8   12.10    7.70
  -3  -6   8   -2.50    4.80
  -3   6  -8    7.00    5.00
   3  -6  -8    1.10    6.40
   4   6  -8   12.80    7.00
   4   6  -8   15.50    7.10
  -4  -6  -8    6.40    7.20
  -4   6   8    6.60    5.10
  -4  -6  -8   10.80    7.50
  -4  -6  -8   15.00    6.80
  -4   6   8   13.20    8.10
  -4   6  -8    4.30    5.10
  -4  -6   8    3.40    6.40
  -4   6  -8    3.80    5.50
   4   6   8    9.70    7.50
   4  -6  -8   17.80    8.00
  -4   6  -8   22.00    8.20
   4   6   8   15.90    8.30
   5   6  -8   22.90    8.10
  -5  -6  -8   29.60    9.80
  -5   6   8   33.40   10.00
  -5  -6  -8   36.10    9.60
  -5   6   8   36.20    7.20
   5   6  -8   36.90    9.60
  -5  -6  -8   12.30    8.10
  -5   6  -8   24.20    8.50
  -5  -6   8   40.40   11.40
  -5  -6   8   16.50    8.40
  -5   6  -8   42.40    9.80
  -5   6  -8   36.80    8.30
   5   6   8   43.30   10.20
   5   6   8   40.00   10.30
   5  -6  -8   32.10    8.90
  -6   6   8    7.20    5.10
  -6  -6  -8   -3.50    7.10
  -6  -6  -8   -1.60    7.30
  -6  -6   8  -10.90    6.30
  -6   6  -8   14.20    7.70
   0   7  -8  123.49   16.10
   0   7   8  128.79   15.50
   0   7  -8  163.58   12.90
   0  -7  -8  180.68   16.20
   0   7   8  126.39   13.30
   1   7  -8    3.20    5.70
   1   7  -8   10.50    8.10
  -1   7   8    1.90    7.20
  -1  -7  -8    2.80    7.40
  -1   7   8    8.10    6.30
   1   7   8    3.70    6.10
   1  -7  -8    1.30    7.10
  -1   7  -8    7.40    5.60
   1   7   8    5.10    6.80
  -1   7  -8    3.20    7.70
  -2  -7  -8  205.28   16.40
   2   7  -8  213.68   15.50
  -2  -7  -8  185.88   17.80
  -2   7   8  221.08   17.90
  -2   7   8  202.88   14.70
   2   7  -8  226.78   17.90
   2   7   8  210.58   16.90
  -2   7  -8  224.88   19.10
   2   7   8  195.38   17.40
  -2   7  -8  250.87   15.20
   2  -7  -8  248.88   18.40
  -3  -7  -8   23.40    9.10
  -3  -7  -8   13.70    7.50
  -3   7   8   11.10    5.90
  -3   7   8   27.60    9.30
   3   7  -8   20.90    8.40
   3   7  -8   26.50    8.60
  -3   7  -8   35.00   10.10
   3   7   8   28.80    9.30
  -3   7  -8   27.30    7.50
   3  -7  -8   25.90    9.60
   3   7   8   21.20    8.70
  -4   7   8   91.79   15.20
  -4  -7  -8  114.39   14.50
   4   7  -8  102.79   13.00
  -4   7   8  106.79   10.50
   4   7  -8  105.29   14.30
  -4  -7  -8  108.69   13.40
   4   7   8   97.79   14.10
   4  -7  -8  113.49   13.80
   4   7   8   76.69   12.90
  -4   7  -8  106.49   14.30
  -5   7   8   83.89    9.80
  -5  -7  -8   89.19   15.00
  -5  -7  -8   72.09   12.60
   5   7  -8   72.09   13.00
  -5   7  -8   68.89   12.50
  -5   7  -8   92.59   13.40
   5  -7  -8   69.29   12.60
   0   8  -8   26.10   11.10
   0   8  -8   28.40    8.00
   0  -8  -8   13.40    8.60
   0   8   8   10.30    8.00
   0   8   8   19.40   10.20
   1   8  -8   83.49   13.90
  -1   8   8   62.09   10.70
  -1   8   8   76.39   13.60
   1   8  -8   63.59   10.80
  -1  -8  -8   72.79   13.50
   1   8   8   82.59   12.50
  -1   8  -8   86.09   14.80
   1   8   8   68.29   13.00
  -1   8  -8   82.09   11.30
   1  -8  -8   85.19   14.50
  -2   8   8   10.40    6.70
  -2   8   8   23.80    9.20
  -2  -8  -8   19.50    9.90
   2   8  -8   20.00    9.50
   2   8  -8   28.80    8.80
   2   8   8   14.80    9.10
  -2   8  -8    6.90    9.80
   2   8   8    5.70    8.00
   2  -8  -8   13.00    9.20
  -3  -8  -8   74.29   14.10
   3   8  -8   82.29   13.90
  -3   8   8   85.19   10.80
   3   8  -8   76.09   12.20
   3  -8  -8   72.59   13.90
  -3   8  -8   73.19   14.50
   0   0   9    2.20    2.20
   0   0   9   -0.10    3.70
   0   0  -9    2.70    4.50
   0   0  -9    2.70    3.70
  -1   0  -9   51.19    6.30
   1   0   9   45.90    6.40
   1   0  -9   57.89    7.00
   1   0  -9   50.19    6.70
  -1   0   9   46.20    6.80
  -1   0  -9   46.70    7.40
   1   0   9   43.50    4.10
   1   0  -9   49.60    7.40
  -1   0  -9   51.29    4.10
   2   0   9    4.50    2.90
   2   0   9    3.00    3.50
   2   0  -9    0.60    3.80
  -2   0   9    5.10    4.50
  -2   0  -9   12.50    5.30
  -2   0  -9    7.30    3.90
  -2   0  -9    4.00    4.00
  -2   0  -9    4.50    2.60
   2   0  -9    2.40    4.70
  -3   0  -9   24.10    5.20
   3   0   9   28.00    6.30
  -3   0   9   25.50    6.30
   3   0   9   23.70    5.00
  -3   0  -9   31.40    4.90
  -3   0   9   26.40    6.20
   3   0  -9   31.00    6.20
  -3   0  -9   31.90    5.70
  -3   0  -9   41.70    6.50
  -3   0  -9   30.80    7.10
  -4   0   9  194.48   13.30
  -4   0  -9  196.98   11.60
   4   0   9  194.98   10.80
  -4   0  -9  213.98   15.10
   4   0   9  203.78   12.00
  -4   0   9  202.88   13.90
  -4   0  -9  200.88   11.10
   4   0  -9  192.38   11.80
  -4   0  -9  210.48    8.60
  -4   0  -9  203.18   12.70
  -5   0   9  598.14   25.90
  -5   0  -9  641.44   24.90
   5   0   9  602.54   23.70
  -5   0  -9  587.94   28.10
   5   0  -9  666.43   23.30
  -5   0  -9  644.04   21.50
  -5   0   9  608.14   25.90
  -6   0  -9   59.39    9.10
  -6   0   9   78.39   11.40
  -6   0   9   78.49   10.80
  -6   0  -9   68.79   11.90
  -7   0   9   33.30    9.60
  -7   0   9   14.10    7.10
  -7   0  -9   20.70    7.60
  -7   0  -9    8.10    8.00
  -8   0   9   12.20    7.50
  -8   0   9   28.00   10.00
  -8   0  -9   15.30    9.90
  -8   0  -9   13.30    7.30
   0   1   9  691.93   24.50
   0  -1  -9  726.93   26.40
   0  -1  -9  703.33   21.80
   0  -1  -9  712.13   25.50
   0   1  -9  734.63   26.20
   0  -1   9  722.03   24.00
   0   1   9  702.43   22.20
   0   1  -9  674.13   23.30
  -1  -1  -9  970.00   32.70
  -1  -1  -9 1043.60   32.50
  -1   1   9  994.90   32.60
   1  -1   9 1014.70   30.90
   1   1  -9 1088.49   32.50
   1   1  -9 1050.49   33.70
  -1  -1  -9 1057.49   32.10
  -1  -1  -9 1043.60   29.90
  -1   1   9  998.60   30.60
  -1   1  -9 1057.49   31.30
   1   1   9 1034.50   32.90
   1   1   9 1006.40   29.80
   1  -1  -9 1005.50   33.60
  -1   1  -9 1004.90   33.30
  -1  -1   9 1009.70   32.30
  -1  -1   9 1036.20   28.10
   1  -1  -9 1033.20   30.00
   2  -1   9 1372.36   38.10
  -2  -1  -9 1306.97   39.90
   2   1  -9 1306.67   40.50
  -2  -1  -9 1275.17   40.30
  -2  -1  -9 1272.57   37.50
  -2   1   9 1273.57   40.00
  -2  -1  -9 1346.67   40.10
   2   1   9 1292.97   40.00
  -2   1  -9 1297.77   34.80
  -2   1  -9 1302.17   37.70
   2  -1  -9 1261.67   40.40
  -2  -1   9 1386.16   37.60
   2   1   9 1284.77   37.80
  -2   1  -9 1316.37   40.50
   2  -1  -9 1300.57   37.20
  -2  -1   9 1381.96   41.00
  -3  -1  -9   63.69    7.30
  -3  -1  -9   58.59    5.80
  -3   1   9   60.89    6.90
   3   1  -9   76.29    8.20
  -3  -1  -9   65.39    7.80
   3  -1   9   51.99    6.20
  -3  -1  -9   40.30    7.60
  -3   1   9   65.59    8.00
  -3  -1  -9   58.59    8.10
  -3   1  -9   54.29    7.20
  -3   1  -9   52.19    8.80
  -3   1  -9   59.29    6.70
  -3   1  -9   55.49    5.90
   3   1   9   56.99    8.40
   3  -1  -9   52.99    7.40
   3  -1  -9   57.19    6.60
  -3   1  -9   63.69    5.60
  -3  -1   9   57.59    8.40
   3   1   9   64.29    7.20
  -3  -1   9   44.50    7.50
  -4  -1  -9   60.09    6.90
  -4   1   9   63.49    8.00
   4  -1   9   55.59    6.40
  -4  -1  -9   50.19    8.10
  -4  -1  -9   69.69    6.00
   4   1  -9   58.09    7.40
  -4  -1  -9   66.09    9.80
  -4   1   9   53.89    8.00
  -4  -1   9   57.39    9.50
   4   1   9   63.89    7.10
  -4   1  -9   54.39    6.20
  -4   1  -9   34.80    8.10
  -4   1  -9   45.90    6.60
   4  -1  -9   41.10    7.00
  -4   1  -9   51.09    6.60
  -4  -1   9   57.29    9.10
   4   1   9   57.89    7.70
   4   1   9   49.30    7.90
   5   1  -9  113.49    9.10
  -5  -1  -9   99.19   12.20
  -5  -1  -9  100.99    6.20
  -5   1   9  108.59   10.70
  -5   1   9  108.09   11.30
  -5  -1  -9   84.49   10.30
  -5  -1  -9  109.89    8.00
  -5   1  -9  115.79   10.10
  -5  -1   9   97.59   12.40
  -5   1  -9  114.09    8.60
   5   1   9  100.69   10.50
  -5  -1   9  114.49   11.70
  -5   1  -9  118.19   13.40
   5  -1  -9  105.19   10.00
  -6   1   9  276.97   17.00
  -6   1   9  274.67   16.60
  -6  -1  -9  291.37   20.00
  -6  -1  -9  293.07   17.80
  -6  -1   9  252.37   18.00
  -6  -1   9  258.07   17.70
  -6   1  -9  259.47   14.80
  -6   1  -9  221.88   18.60
  -7   1   9   76.79   11.30
  -7  -1  -9   66.39   12.70
  -7   1   9   71.79   11.40
  -7  -1  -9   39.60    9.50
  -7   1  -9   60.79    9.00
  -7   1  -9   53.99   12.60
  -7  -1   9   68.79   12.60
  -7  -1   9   64.89   11.10
  -8   1   9   57.39   11.20
  -8  -1  -9   40.20   12.20
  -8   1   9   43.00   10.00
  -8  -1  -9   36.40   10.20
  -8  -1   9   46.10   11.70
  -8  -1   9   72.99   12.60
  -8   1  -9   46.60   12.60
  -8   1  -9   47.30    8.80
   0  -2   9  139.19    9.20
   0   2   9  130.09    9.50
   0  -2  -9  129.49    9.10
   0  -2  -9  124.19   10.70
   0  -2  -9  155.28    7.70
   0  -2   9  139.09    4.90
   0   2  -9  142.69   11.00
   0   2  -9  152.78    9.40
   0   2   9  153.18   10.50
  -1   2   9  295.77   14.70
  -1  -2  -9  296.67   15.70
  -1  -2  -9  308.47   13.20
  -1  -2  -9  308.07   13.80
   1   2  -9  293.47   14.40
   1  -2   9  278.77   12.40
  -1   2   9  285.97   14.20
  -1   2  -9  333.97   16.30
   1  -2  -9  307.77   16.30
   1   2   9  318.97   14.20
  -1   2  -9  297.67   12.70
   1   2   9  322.27   15.70
  -1   2  -9  307.97    8.60
  -1  -2   9  289.17   14.10
  -1  -2   9  314.17   11.10
   1  -2  -9  320.37   10.60
  -2   2   9  103.39    9.10
   2  -2   9  105.99    7.00
  -2   2   9  112.49    9.70
   2   2  -9  102.99   10.30
  -2  -2  -9  116.89    9.20
  -2  -2  -9  117.39    9.10
  -2  -2  -9  108.09   10.90
  -2  -2  -9   96.39    8.80
   2  -2  -9  116.79    6.00
   2   2   9  101.99    8.90
  -2   2  -9  103.39   10.10
  -2  -2   9  102.99    9.50
  -2   2  -9  111.79    7.30
  -2  -2   9  120.49    7.80
   2  -2  -9  105.89   10.10
   2   2   9  140.89   10.60
  -3  -2  -9  110.49    9.30
   3  -2   9  107.89    6.70
   3   2  -9  116.59   10.10
  -3  -2  -9  106.09    8.40
  -3  -2  -9  110.89   10.50
  -3   2   9   99.19    9.20
  -3  -2  -9  111.69   10.20
  -3   2   9  103.09    7.30
   3  -2  -9  107.59    7.00
   3   2   9  106.19   10.40
  -3   2  -9  107.29    9.80
  -3  -2   9  115.89   11.50
  -3  -2   9   87.29    9.70
   3  -2  -9  107.69   10.60
  -3   2  -9  115.19   11.50
  -3   2  -9  116.29    7.10
   3   2   9  130.29   10.30
  -3   2  -9  112.99    7.20
  -4  -2  -9  571.04   25.20
  -4   2   9  585.54   20.90
  -4  -2  -9  580.04   20.70
  -4  -2  -9  586.54   24.90
  -4   2   9  574.04   23.10
   4   2  -9  557.44   22.30
  -4  -2   9  561.84   25.00
   4   2   9  585.54   24.60
  -4   2  -9  592.64   22.80
  -4  -2   9  614.94   26.60
  -4   2  -9  560.84   19.70
  -4   2  -9  548.95   26.00
  -4   2  -9  545.95   19.10
  -4   2  -9  606.24   18.50
   4   2   9  556.94   23.40
   4  -2  -9  565.74   20.60
  -5   2   9   74.79   10.00
   5   2  -9   83.59    8.50
  -5  -2  -9   87.69    7.40
  -5   2   9   84.59    9.10
  -5  -2  -9   80.19   12.70
  -5  -2  -9   72.89   11.00
   5   2   9   79.19   10.10
  -5  -2   9   79.49   11.10
  -5  -2   9   91.89   12.20
  -5   2  -9   80.99    7.60
  -5   2  -9   71.29    8.10
   5   2   9   69.39    9.90
  -5   2  -9   59.99   11.10
  -6  -2  -9   20.00    8.30
  -6   2   9   10.80    6.40
  -6   2   9    5.20    6.10
  -6  -2  -9   11.20    8.60
  -6  -2   9   17.20    7.60
  -6  -2   9   13.90    8.00
  -6   2  -9   10.10    4.50
  -6   2  -9   15.70    8.40
   6   2   9    6.80    6.50
  -7  -2  -9   30.70   10.10
  -7   2   9   27.50    8.00
  -7   2   9   30.70    7.90
  -7  -2  -9   16.30    8.10
  -7   2  -9   31.80   10.90
  -7  -2   9   31.30   10.90
  -7   2  -9   24.90    6.00
  -7  -2   9   30.30    9.10
  -8   2   9   45.20    9.60
  -8  -2  -9   60.39   14.90
  -8  -2  -9   51.39   12.90
  -8   2  -9   59.59    8.20
  -8   2  -9   56.59   14.50
  -8  -2   9   44.20   12.00
   0  -3   9    8.60    2.70
   0   3   9    9.80    5.30
   0  -3   9   11.50    4.10
   0  -3  -9    7.90    2.50
   0   3  -9    9.40    3.90
   0   3  -9    4.40    5.10
   0   3  -9   11.30    2.70
   0   3   9    9.30    5.20
   0  -3  -9   13.90    5.50
  -1  -3  -9   57.99    6.30
  -1  -3  -9   42.70    7.30
  -1   3   9   70.19    8.20
   1  -3   9   46.10    5.60
   1   3  -9   51.29    7.20
  -1  -3  -9   45.40    7.70
  -1   3   9   53.69    7.70
   1   3  -9   53.69    8.90
   1   3  -9   49.80    5.20
  -1  -3   9   48.80    5.10
  -1   3  -9   34.50    8.00
  -1  -3   9   40.20    6.50
   1   3   9   52.19    8.00
   1  -3  -9   52.29    8.10
  -1   3  -9   44.30    5.60
  -1   3  -9   42.70    4.00
   1   3   9   40.20    7.30
   2   3  -9  744.23   28.20
   2   3  -9  714.73   24.40
  -2  -3  -9  740.93   26.10
  -2   3   9  750.72   27.80
  -2   3   9  719.03   26.50
  -2  -3  -9  724.83   28.30
  -2  -3  -9  770.52   27.30
   2   3   9  772.82   27.50
  -2  -3   9  751.32   27.30
  -2   3  -9  736.63   22.50
  -2   3  -9  718.93   28.00
  -2  -3   9  757.12   24.50
   2  -3  -9  781.42   28.40
  -2   3  -9  730.83   22.70
   2   3   9  730.23   28.20
   3   3  -9   38.10    7.70
   3  -3   9   23.20    3.40
  -3  -3  -9   31.60    7.40
  -3  -3  -9   30.80    6.60
  -3   3   9   20.00    6.00
  -3  -3  -9   27.30    6.70
  -3   3   9   34.40    7.90
   3  -3  -9   30.40    3.40
  -3   3  -9   24.40    6.60
  -3   3  -9   28.30    4.00
  -3  -3   9   28.80    7.00
   3   3   9   38.60    7.40
   3   3   9   38.20    8.00
   3  -3  -9   37.10    7.40
  -4   3   9  107.19    7.50
   4   3  -9  126.79   10.80
  -4   3   9  115.49   10.50
  -4  -3  -9  103.19   11.10
  -4  -3  -9   94.09    9.20
  -4  -3  -9  125.59   12.70
  -4   3  -9   91.09    6.30
  -4   3  -9   90.59    5.90
  -4  -3   9  105.99   13.60
   4   3   9   96.99   10.60
  -4   3  -9   95.99   12.20
  -4  -3   9   93.39   11.70
  -4   3  -9   85.09   10.00
   4   3   9  114.49   11.70
   4  -3  -9  105.69   11.30
   5   3  -9   16.40    5.60
  -5  -3  -9   10.40    6.80
  -5  -3  -9    6.50    6.60
  -5  -3  -9   15.00    5.40
  -5   3   9   13.10    4.80
  -5   3   9   13.30    6.20
  -5   3  -9    4.20    4.60
  -5  -3   9   14.00    6.80
  -5  -3   9    7.40    7.50
  -5   3  -9   14.90    7.60
   5   3   9    3.20    5.90
  -5   3  -9   12.80    3.40
   5   3   9    9.80    6.50
   5  -3  -9    6.10    5.70
  -6   3   9  390.56   19.50
  -6  -3  -9  356.86   22.20
  -6  -3  -9  350.46   21.50
   6   3   9  350.16   21.00
  -6   3  -9  390.56   23.80
  -6   3  -9  371.96   13.70
   6   3   9  388.16   22.20
  -6  -3   9  367.36   21.70
  -6  -3   9  385.06   24.90
   6  -3  -9  324.47   18.10
  -7   3   9   80.09   11.50
  -7  -3  -9  114.49   15.30
  -7  -3  -9  105.99   15.90
  -7  -3   9  114.29   16.90
  -7   3  -9   89.59   14.80
  -7  -3   9  109.79   13.60
  -8   3   9   53.29    9.70
   0   4  -9  206.58   15.20
   0   4  -9  214.58   11.40
   0  -4  -9  186.28    7.30
   0  -4  -9  190.48   13.60
   0   4   9  179.68   13.00
   0   4   9  187.28   13.20
   0  -4   9  188.58    9.70
   0  -4  -9  220.78   14.00
   0   4  -9  192.68    9.70
   0  -4   9  202.88   11.00
  -1  -4  -9  295.67   12.60
  -1  -4  -9  285.77   16.50
  -1  -4  -9  294.37   16.60
  -1   4   9  257.87   15.40
   1   4  -9  310.87   15.10
   1   4  -9  292.67   17.30
   1  -4   9  300.67   12.30
  -1   4   9  280.97   16.30
   1   4  -9  285.17   13.00
   1   4   9  286.67   12.30
  -1   4  -9  326.87   18.70
   1  -4  -9  283.47   16.60
  -1   4  -9  301.67   12.80
  -1  -4   9  284.97   13.00
  -1   4  -9  314.17   12.40
   1   4   9  288.07   16.50
   1   4   9  308.07   17.20
  -1  -4   9  285.67   14.50
  -2   4   9  108.69   10.30
   2  -4   9  112.19    6.00
  -2  -4  -9  114.29    9.40
  -2   4   9  122.09   11.40
  -2  -4  -9   94.39   11.80
   2   4  -9  122.79   11.60
  -2  -4  -9  133.19   11.90
   2   4  -9   98.69    8.70
   2  -4  -9  121.69   11.50
  -2   4  -9  106.09    7.70
  -2  -4   9  124.19   11.00
   2   4   9  141.89   12.40
  -2   4  -9  118.89    6.90
   2   4   9  104.09   10.80
  -2   4  -9   94.19   11.20
  -3   4   9  106.99   10.00
  -3  -4  -9   94.99    9.90
  -3  -4  -9   91.29   10.50
  -3  -4  -9   78.89   11.70
   3   4  -9   90.69   11.10
  -3   4   9   95.49   11.00
   3   4  -9   79.19    8.90
   3   4   9   99.69   11.40
  -3   4  -9   85.09    5.00
  -3  -4   9   97.09   11.50
   3  -4  -9   98.19   11.60
  -3   4  -9   72.79    7.30
  -3   4  -9   70.99    9.90
   3   4   9   80.49   11.30
   4   4  -9  338.77   18.00
  -4  -4  -9  325.77   18.90
  -4  -4  -9  322.37   17.20
  -4   4   9  298.57   19.20
  -4  -4  -9  288.07   19.10
  -4   4   9  317.67   16.40
  -4   4  -9  289.57   19.20
  -4  -4   9  317.07   21.00
   4   4   9  333.77   19.20
  -4   4  -9  322.47   18.20
  -4   4  -9  343.87   16.00
   4   4   9  304.37   19.10
   4  -4  -9  290.17   17.20
  -4  -4   9  338.17   19.20
   5   4  -9   29.40    7.30
  -5  -4  -9    8.50    7.50
  -5   4   9   15.30    7.60
  -5   4   9   27.70    6.80
  -5  -4  -9   26.60    9.00
  -5  -4  -9   16.00    6.20
   5   4   9   24.10    8.30
  -5   4  -9    8.20    5.60
  -5   4  -9   25.80    8.60
   5   4   9   32.10    8.70
  -5  -4   9   23.20    8.10
   5  -4  -9   23.20    7.60
  -5  -4   9   16.30    9.00
  -6  -4  -9  158.38   16.50
  -6   4   9  140.29   12.30
  -6  -4  -9  142.09   15.00
   6   4   9  117.39   14.20
  -6   4  -9  164.68   16.80
   6   4   9  139.09   15.40
   6  -4  -9  110.19   12.00
  -6  -4   9  143.69   16.90
  -6  -4   9  126.29   14.60
  -7   4   9  135.19   12.80
  -7  -4  -9  160.88   16.70
  -7  -4  -9  116.99   16.40
  -7  -4   9  125.09   15.30
  -7   4  -9  124.89   15.40
   7   4   9  127.39   15.70
  -7  -4   9  133.29   16.90
   0   5   9   68.99   10.30
   0   5  -9   69.29   11.40
   0  -5  -9   68.99   10.50
   0   5  -9   81.19    7.70
   0  -5  -9   61.19    9.50
   0   5   9   73.49   10.10
   0  -5   9   58.79    7.20
  -1  -5  -9  527.35   24.40
  -1  -5  -9  495.45   18.30
   1   5  -9  531.15   20.50
  -1   5   9  546.45   23.20
  -1   5   9  525.85   24.60
   1   5  -9  525.65   25.70
  -1  -5  -9  514.05   23.60
   1  -5  -9  553.24   23.10
   1   5   9  555.94   24.50
  -1   5  -9  513.65   19.80
  -1   5  -9  526.95   25.90
   1  -5  -9  556.94   25.30
  -1  -5   9  515.25   21.50
   1   5   9  528.85   25.40
  -2  -5  -9   79.29   11.60
  -2   5   9   64.19    9.30
  -2  -5  -9   72.19    8.10
  -2   5   9   78.59   11.00
  -2  -5  -9   95.59   11.70
   2   5  -9   88.89   11.50
   2   5  -9   71.29    8.60
  -2   5  -9   49.00    7.00
   2   5   9   89.49   11.40
  -2   5  -9   78.19   11.50
   2   5   9   76.39   10.80
   2  -5  -9   89.49   11.10
  -2  -5   9   67.69    8.50
   3   5  -9  635.84   27.60
  -3  -5  -9  620.64   28.90
  -3   5   9  643.04   28.90
  -3  -5  -9  634.14   25.40
   3   5  -9  645.44   25.70
  -3  -5  -9  624.34   26.70
  -3   5   9  618.04   24.60
   3  -5  -9  628.04   27.30
  -3  -5   9  618.14   26.90
  -3   5  -9  579.14   22.80
  -3   5  -9  609.94   27.80
   3   5   9  602.54   27.80
   3   5   9  583.74   27.40
  -4  -5  -9  197.28   15.30
  -4   5   9  183.78   12.80
  -4  -5  -9  196.88   16.60
  -4   5   9  174.18   15.70
   4   5  -9  212.88   14.90
  -4  -5  -9  164.48   13.40
   4   5  -9  177.08   14.70
  -4   5  -9  190.58   15.10
  -4   5  -9  213.48   13.00
   4   5   9  221.08   17.70
   4  -5  -9  181.68   15.30
  -4   5  -9  219.58   17.20
  -4  -5   9  174.38   15.80
   4   5   9  175.18   15.60
  -5  -5  -9  172.88   16.30
   5   5  -9  152.08   13.30
  -5   5   9  147.49   16.50
  -5  -5  -9  177.78   14.00
  -5  -5  -9  169.98   15.20
  -5   5   9  165.18   12.60
  -5   5  -9  170.98   14.30
  -5   5  -9  170.88   13.00
  -5  -5   9  158.58   15.50
  -5   5  -9  178.88   16.10
   5   5   9  160.08   16.30
   5   5   9  172.28   16.20
  -5  -5   9  140.09   16.60
   5  -5  -9  155.08   13.60
  -6   5   9   32.60    7.30
  -6  -5  -9   22.60    9.50
  -6   5   9   51.89   11.70
  -6  -5  -9   46.70   11.30
  -6  -5   9   10.40    9.40
   6   5   9   59.99   12.10
  -6  -5   9   41.70   10.40
   6  -5  -9   29.90    8.30
  -6   5  -9   31.50    8.30
  -6   5  -9   50.89   11.00
  -7  -5  -9  108.69   16.20
  -7   5   9   84.49   10.70
  -7   5  -9   71.89   13.90
  -7  -5   9   65.29   13.10
   0   6   9  479.15   24.50
   0  -6  -9  486.95   22.60
   0   6   9  463.55   22.60
   0   6  -9  473.25   20.20
   0  -6  -9  450.75   23.90
   0   6  -9  464.35   25.60
   1   6  -9  166.68   12.20
  -1   6   9  161.88   13.40
  -1  -6  -9  149.39   15.30
   1   6  -9  177.78   16.60
  -1   6   9  135.69   14.00
  -1  -6  -9  146.09   13.40
  -1   6  -9  146.29   15.10
   1   6   9  150.58   14.60
   1  -6  -9  149.19   14.60
   1   6   9  149.49   14.40
  -1   6  -9  139.49   10.90
  -2   6   9  240.58   15.00
   2   6  -9  238.68   14.80
  -2  -6  -9  236.58   17.20
  -2  -6  -9  231.38   17.00
  -2   6   9  246.48   17.80
   2   6  -9  240.48   18.70
   2   6   9  223.38   16.90
   2   6   9  238.88   17.70
  -2   6  -9  224.78   13.40
   2  -6  -9  211.38   16.70
  -2   6  -9  238.48   18.20
  -3  -6  -9   21.30    6.80
  -3  -6  -9   14.40    8.30
  -3   6   9   10.50    6.00
   3   6  -9    4.60    5.80
  -3  -6  -9   26.60    8.70
  -3   6   9   26.40    8.90
   3   6  -9   30.20    8.40
  -3   6  -9   22.50    6.20
   3   6   9    7.30    7.80
  -3   6  -9    5.60    7.30
   3  -6  -9    5.70    6.90
  -3  -6   9   22.50    7.50
   3   6   9    0.30    6.40
  -4  -6  -9   43.40    9.10
  -4   6   9   62.99   12.30
  -4  -6  -9   56.19   12.40
   4   6  -9   80.99   12.40
   4   6  -9   54.19   10.20
  -4   6   9   68.19    9.70
  -4  -6  -9   56.29   11.00
  -4  -6   9   54.49   10.40
  -4   6  -9   59.49    9.00
   4   6   9   57.99   12.40
  -4   6  -9   55.89   11.00
   4   6   9   78.89   13.20
   4  -6  -9   65.79   11.90
  -5  -6  -9   -3.60    6.50
  -5  -6  -9    6.30    7.00
  -5   6   9   -1.10    7.00
  -5   6   9   13.30    5.60
   5   6  -9   12.30    7.60
  -5  -6  -9    8.30    7.00
   5   6  -9   11.40    7.00
  -5  -6   9    4.90    7.50
   5  -6  -9    8.20    6.90
   5   6   9   16.30    9.20
  -5   6  -9   16.00    8.20
   5   6   9    6.70    7.60
  -5   6  -9    6.60    7.00
  -6  -6  -9   60.59   12.20
  -6   6   9   58.79    8.80
  -6  -6  -9   58.19   12.50
  -6  -6   9   61.89   13.00
  -6   6  -9   98.49   13.90
   0   7  -9  240.28   15.20
   0   7   9  246.78   18.60
   0  -7  -9  240.68   18.70
   0   7  -9  240.48   19.10
   0   7   9  238.88   16.70
  -1  -7  -9   68.19   12.60
  -1   7   9   60.09   11.80
   1   7  -9   69.69   12.40
  -1   7   9   96.59   11.50
   1   7  -9   85.59   10.80
  -1   7  -9   88.49   14.30
   1   7   9   70.49   11.30
   1  -7  -9  129.29   15.40
  -1   7  -9  111.19   11.00
   1   7   9  116.39   14.20
   2   7  -9   -2.50    6.60
  -2  -7  -9    8.50    7.10
   2   7  -9    8.10    6.30
  -2   7   9    3.30    6.70
  -2  -7  -9   -3.10    6.90
  -2   7   9   12.00    6.50
   2  -7  -9   12.70    7.40
  -2   7  -9   -3.70    4.30
  -2   7  -9    5.00    7.90
   2   7   9    7.60    8.00
   2   7   9    0.00    6.50
  -3   7   9  166.38   13.60
  -3   7   9  170.38   17.70
   3   7  -9  167.98   14.40
   3   7  -9  163.08   17.20
  -3  -7  -9  157.58   17.20
  -3  -7  -9  175.68   17.40
   3   7   9  177.28   17.80
   3  -7  -9  199.88   16.90
  -3   7  -9  160.78   17.90
   3   7   9  206.68   18.40
   4   7  -9    8.00    6.60
  -4   7   9    4.10    5.60
  -4   7   9   11.80    8.30
  -4  -7  -9    8.10    7.20
  -4  -7  -9   15.00    8.70
   4   7  -9   -1.30    7.00
  -4   7  -9    1.60    6.90
   4   7   9    6.60    7.90
   4   7   9   -4.70    7.20
   4  -7  -9    6.50    8.20
  -5  -7  -9   35.10   10.90
   5   7  -9   31.10    9.50
  -5  -7  -9   32.80    9.20
  -5   7   9   39.10    7.70
  -5   7  -9   21.50    7.90
  -5   7  -9   14.70    9.20
   5  -7  -9   28.10    9.50
   0   8  -9  249.58   20.80
   0   8   9  239.18   17.90
   0   8   9  244.18   19.90
   0  -8  -9  265.47   21.40
  -1   8   9   17.20    8.90
  -1   8   9   16.10    7.90
  -1  -8  -9   13.50    9.00
   1   8  -9   22.90   10.10
   1   8   9    4.10    7.70
  -1   8  -9   13.50    9.60
   1  -8  -9   17.00    9.30
   1   8   9   14.10    8.10
   2   8  -9   79.29   14.20
   2   8  -9   71.79   15.70
  -2  -8  -9   86.39   14.30
  -2   8   9   62.99   10.50
  -2   8   9   67.99   14.70
  -2   8  -9   64.79   13.50
   2   8   9   83.49   15.40
   2   8   9   77.09   15.20
   2  -8  -9   78.49   14.10
   3   8  -9   -7.80    6.70
  -3   8   9   -0.50    6.50
   3   8  -9    6.30    7.10
  -3  -8  -9   -4.80    6.80
   3  -8  -9   -5.90    6.50
   0   0  10   71.29    8.30
   0   0 -10   79.19    7.60
   0   0  10   69.09    4.60
   0   0 -10   77.19    8.80
  -1   0 -10   42.70    7.10
   1   0 -10   53.09    8.00
  -1   0  10   56.79    7.60
   1   0  10   50.49    4.10
  -1   0 -10   50.99    7.00
  -1   0 -10   47.70    4.00
   1   0  10   45.90    6.70
  -2   0  10  237.88   13.50
   2   0 -10  229.18   12.70
   2   0  10  228.48    9.80
  -2   0 -10  236.38    9.80
   2   0  10  223.78   12.40
  -2   0 -10  235.98   12.30
  -2   0 -10  227.68   13.70
   2   0 -10  233.18   13.40
  -2   0 -10  241.38   13.40
  -3   0 -10    3.50    3.10
   3   0 -10    2.40    4.40
  -3   0  10   -2.50    3.90
  -3   0 -10    1.60    3.90
  -3   0 -10    4.50    5.20
   3   0  10   -0.50    3.80
  -3   0  10    8.20    4.60
  -3   0 -10    0.30    3.40
  -3   0 -10    0.60    4.40
  -4   0 -10  852.91   33.50
  -4   0 -10  860.51   29.20
  -4   0 -10  848.42   28.40
  -4   0  10  793.12   30.50
  -4   0 -10  873.11   30.10
   4   0 -10  868.21   29.80
  -4   0  10  893.51   31.80
   4   0  10  831.22   29.30
  -5   0 -10  242.38   12.40
  -5   0  10  250.97   16.10
  -5   0 -10  221.88   17.10
  -5   0  10  246.98   15.70
   5   0  10  243.98   13.90
  -5   0 -10  232.98   14.90
   5   0 -10  263.27   14.10
  -6   0  10  291.97   18.60
  -6   0  10  359.56   20.20
  -6   0 -10  296.17   20.90
  -6   0 -10  296.67   17.50
  -7   0  10    2.20    6.10
  -7   0 -10    1.70    5.90
  -7   0 -10    4.40    7.50
  -7   0  10   -1.80    5.80
  -8   0  10    9.20    7.60
  -8   0  10   28.70    9.80
  -8   0 -10   16.50    9.60
  -8   0 -10   13.00    7.20
   0   1 -10  705.13   23.40
   0  -1 -10  655.63   25.10
   0   1 -10  641.44   24.90
   0   1  10  628.54   21.00
   0   1  10  685.33   24.30
   0  -1  10  655.43   23.30
  -1  -1 -10  206.38   11.70
   1   1 -10  191.78   12.50
  -1   1  10  214.18   10.40
  -1   1  10  192.38   11.90
  -1  -1 -10  204.68   12.50
   1  -1  10  187.38   10.80
  -1  -1 -10  207.98    9.70
   1   1 -10  218.38   13.70
  -1   1 -10  214.88   10.90
  -1   1 -10  179.38   12.20
   1   1  10  209.88   12.10
  -1  -1  10  203.48    8.20
   1   1  10  186.18    9.50
   1  -1 -10  213.78   10.20
   1  -1 -10  180.48   13.00
  -1  -1  10  198.98   12.20
   2   1 -10  269.17   14.70
  -2  -1 -10  279.97   14.30
  -2  -1 -10  275.77   14.90
  -2  -1 -10  271.67   11.80
  -2   1  10  252.97   14.00
   2  -1  10  244.58   12.20
   2   1  10  269.87   14.50
   2  -1 -10  254.77   14.80
  -2  -1  10  261.47   14.20
  -2   1 -10  253.67    9.20
   2   1  10  279.67   12.40
  -2   1 -10  239.68   13.80
  -2  -1  10  274.87   11.70
   2  -1 -10  270.07   12.10
  -2   1 -10  256.07   12.20
   3   1 -10  344.87   16.80
  -3  -1 -10  350.96   16.20
  -3   1  10  344.07   17.10
  -3  -1 -10  359.76   17.70
  -3  -1 -10  342.97   18.30
  -3  -1 -10  335.07   14.50
   3  -1  10  333.67   14.40
   3  -1 -10  360.36   17.30
  -3   1 -10  341.77   14.80
   3   1  10  338.77   15.10
  -3   1 -10  333.47   18.50
   3  -1 -10  364.66   15.00
  -3   1 -10  361.36   16.30
  -3  -1  10  371.46   18.20
   3   1  10  355.96   16.90
  -3   1 -10  347.77   13.40
  -4  -1 -10   21.60    7.70
  -4   1  10   18.80    6.00
  -4  -1 -10   16.00    4.90
   4   1 -10   24.60    5.80
   4  -1  10   21.40    4.80
  -4  -1 -10   21.90    4.50
  -4  -1 -10   22.90    6.70
  -4   1  10   22.40    6.30
  -4   1 -10   22.00    4.90
   4   1  10   29.40    6.50
   4   1  10   26.90    6.30
  -4   1 -10   15.70    5.20
  -4   1 -10   27.20    8.00
  -4  -1  10   11.90    6.10
  -4   1 -10   17.70    5.10
   4  -1 -10   21.60    6.20
  -4  -1  10   22.50    7.00
  -5  -1 -10   78.49    7.50
  -5  -1 -10   76.39   12.10
  -5   1  10   80.09    9.80
   5   1 -10   67.39    8.30
  -5   1  10   83.69   10.10
  -5  -1 -10   63.79   10.30
  -5  -1 -10   66.69    5.80
  -5   1 -10   69.69    8.10
  -5   1 -10   73.19    9.00
  -5  -1  10   62.09   11.00
   5   1  10   74.09    9.80
  -5   1 -10   77.59   11.80
   5  -1 -10   69.79    9.20
  -5  -1  10   83.59   10.80
  -6   1  10  137.79   13.30
  -6  -1 -10  129.69   14.80
  -6  -1 -10  152.08   13.40
  -6   1  10  133.69   12.80
  -6   1 -10  147.49   11.60
  -6   1 -10  133.09   15.20
  -6  -1  10   86.39   12.50
  -6  -1  10  133.29   14.20
  -7  -1 -10   18.00    7.90
  -7   1  10   15.60    7.70
  -7  -1 -10    1.20    7.20
  -7   1  10   -5.80    6.00
  -7  -1  10   10.60    7.90
  -7  -1  10    7.50    7.10
  -7   1 -10   23.10    9.30
  -7   1 -10    7.10    5.90
  -8  -1 -10    5.70    7.80
  -8   1  10    0.10    7.30
  -8   1  10   12.20    7.70
  -8   1 -10   -4.90    8.70
  -8   1 -10    4.10    6.10
  -8  -1  10    6.30    8.70
   0  -2  10  730.63   24.80
   0  -2 -10  809.02   32.90
   0   2  10  741.73   25.00
   0   2 -10  753.42   25.10
   0  -2 -10  707.03   22.50
   0   2 -10  692.03   27.00
   0   2  10  713.33   26.30
   0  -2 -10  724.33   27.50
  -1  -2 -10    8.80    4.10
  -1   2  10    8.60    5.30
   1   2 -10    2.30    3.80
  -1  -2 -10    9.10    4.90
   1   2 -10    5.90    5.60
   1  -2  10   14.80    4.10
  -1   2  10    3.50    3.70
  -1  -2  10   11.10    2.70
   1  -2 -10   13.00    3.10
  -1   2 -10   13.10    4.00
   1   2  10    7.60    4.30
  -1   2 -10   -1.90    4.80
   1   2  10   10.50    5.50
   1  -2 -10    3.20    5.10
  -1  -2  10   10.80    4.90
  -2   2  10  848.82   30.00
  -2  -2 -10  818.12   30.10
  -2  -2 -10  884.71   29.90
  -2  -2 -10  833.52   28.90
   2  -2  10  893.31   27.00
  -2   2  10  891.01   30.20
  -2  -2 -10  843.82   30.80
   2   2 -10  811.82   30.40
   2   2  10  908.71   31.10
  -2   2 -10  896.11   31.30
   2   2  10  854.41   28.80
   2  -2 -10  874.21   31.20
   2  -2 -10  889.61   25.00
  -2   2 -10  879.41   27.00
  -2  -2  10  859.11   30.30
  -2   2 -10  863.11   23.80
  -2  -2  10  940.21   27.10
  -2   2 -10  856.51   23.90
  -3  -2 -10  313.47   14.60
   3   2 -10  294.47   16.00
   3  -2  10  301.37   12.30
  -3  -2 -10  314.77   16.50
  -3  -2 -10  255.27   14.60
  -3   2  10  293.77   15.50
  -3  -2 -10  309.27   17.20
  -3   2 -10  270.87   15.40
  -3   2 -10  301.97   11.90
  -3  -2  10  283.17   16.20
   3  -2 -10  286.27   15.90
   3   2  10  264.77   14.30
  -3   2 -10  304.37   12.80
   3   2  10  276.37   16.10
   3  -2 -10  307.37   12.10
  -4   2  10  505.85   19.70
  -4  -2 -10  547.05   25.50
  -4   2  10  497.85   22.30
   4   2 -10  490.65   21.70
  -4  -2 -10  516.45   19.80
  -4  -2 -10  581.04   25.00
   4  -2  10  540.15   22.70
  -4   2 -10  528.85   19.30
   4   2  10  553.84   22.80
  -4  -2  10  555.74   25.50
  -4   2 -10  538.25   18.70
  -4   2 -10  506.55   25.40
  -4   2 -10  532.85   17.70
   4  -2 -10  532.75   19.70
  -4  -2  10  489.15   23.30
   4   2  10  552.34   23.80
  -4   2 -10  548.65   22.00
  -5   2  10   18.50    6.00
  -5  -2 -10   22.40    5.10
   5   2 -10   22.00    5.80
  -5  -2 -10   27.80    8.50
  -5   2  10   21.80    7.00
  -5  -2 -10   40.00    9.20
  -5  -2  10   24.90    8.90
  -5   2 -10   19.60    5.60
  -5   2 -10   32.40    9.30
  -5   2 -10   31.40    6.00
  -5  -2  10   34.90    8.30
   5   2  10   17.80    6.70
   5   2  10   24.50    7.50
  -6   2  10  246.18   15.50
  -6  -2 -10  263.17   18.80
  -6   2  10  252.97   16.00
  -6  -2 -10  241.48   19.50
  -6  -2  10  241.18   17.60
  -6   2 -10  258.27   19.70
  -6   2 -10  240.08   13.00
   6   2  10  227.18   16.70
  -6  -2  10  247.58   18.90
  -7   2  10    6.00    6.90
  -7  -2 -10    2.40    7.30
  -7  -2 -10   -2.60    8.00
  -7   2 -10    1.40    4.60
  -7  -2  10   16.40    8.60
  -7  -2  10    4.90    7.70
  -7   2 -10   13.60    9.10
  -8   2  10  143.69   14.80
  -8   2 -10  149.39   11.50
  -8  -2  10  150.98   18.20
   0   3 -10   87.69    5.00
   0   3  10   78.99    9.00
   0   3 -10   90.09   10.40
   0  -3  10   88.79    5.20
   0  -3 -10   83.79    5.50
   0  -3  10   79.29    7.70
   0   3  10   81.39    9.20
   0  -3 -10  106.99   10.80
   0   3 -10   81.49    7.80
   1  -3  10  127.89    8.50
   1   3 -10  147.09   12.10
  -1  -3 -10  140.19    8.80
   1   3 -10  146.69   10.10
  -1  -3 -10  154.98   11.50
  -1  -3 -10  145.19   11.60
  -1   3  10  142.69   11.20
  -1   3  10  136.89   11.30
   1   3 -10  145.39    7.60
  -1   3 -10  133.89   12.00
  -1  -3  10  132.49   10.50
   1   3  10  149.79   11.50
  -1   3 -10  139.99    6.20
  -1   3 -10  142.49    8.70
  -1  -3  10  136.29    7.50
   1   3  10  133.79   10.50
   1  -3 -10  147.39   11.80
  -2  -3 -10   30.60    6.40
  -2  -3 -10   27.50    7.10
   2   3 -10   20.00    6.90
   2  -3  10   26.00    4.10
  -2   3  10   16.80    5.50
  -2  -3 -10   25.20    5.80
  -2   3  10   22.70    6.50
   2   3  10   16.60    6.20
  -2  -3  10   20.60    6.20
  -2  -3  10   20.50    4.60
  -2   3 -10   24.60    3.80
   2   3  10   19.40    6.10
  -2   3 -10   25.30    4.40
  -2   3 -10   21.70    6.60
  -3  -3 -10   27.30    6.40
  -3   3  10   21.80    7.40
   3   3 -10   21.50    6.70
  -3  -3 -10   23.80    7.20
   3  -3  10   19.30    3.20
  -3  -3 -10   32.90    6.90
  -3   3  10   19.40    5.70
  -3   3 -10   26.50    4.20
   3   3  10   14.10    5.70
   3  -3 -10   25.80    3.20
  -3   3 -10   25.70    4.60
  -3  -3  10   19.20    6.60
  -3   3 -10   24.70    7.00
   3   3  10   34.80    8.00
  -4  -3 -10   55.79    9.70
   4   3 -10   50.89    8.40
  -4   3  10   46.60    5.70
  -4   3  10   69.69    9.50
  -4  -3 -10   63.79   10.30
  -4  -3 -10   50.39    7.80
   4   3  10   55.79    9.00
  -4   3 -10   63.89   11.30
  -4  -3  10   51.09    9.70
   4   3  10   46.00    9.20
  -4   3 -10   64.69    5.90
  -4  -3  10   54.79   11.40
  -4   3 -10   61.99    9.30
  -5  -3 -10   92.69    8.90
  -5  -3 -10   87.79   12.50
   5   3 -10   67.29    9.50
  -5  -3 -10  101.39   12.40
  -5   3  10   69.69   10.10
  -5  -3  10   83.09   13.00
   5  -3 -10   81.89   11.00
  -5  -3  10   86.09   11.90
   5   3  10  105.59   12.50
  -5   3 -10   93.69   10.20
  -5   3 -10   74.29   13.40
  -5   3 -10   80.19    6.60
   5   3  10   86.79   11.70
  -6  -3 -10   14.90    8.30
  -6   3  10   -6.40    4.90
  -6  -3 -10   -4.30    5.80
   6   3  10    5.60    7.00
   6  -3 -10    3.20    5.60
  -6   3 -10   -0.90    8.00
  -6  -3  10    8.60    7.00
   6   3  10    5.80    6.90
  -6  -3  10   -5.30    6.60
  -6   3 -10    3.50    3.40
  -7   3  10   17.30    6.90
  -7  -3 -10    3.40    8.50
  -7  -3 -10   14.60    8.20
  -7   3 -10   15.60    9.30
  -7  -3  10   -0.30    6.70
  -7  -3  10    5.80    8.50
   0  -4  10  945.81   30.50
   0  -4  10  953.50   28.30
   0   4 -10  970.90   35.70
   0  -4 -10  962.60   33.90
   0   4  10  881.61   33.40
   0   4  10  952.70   34.10
   0   4 -10  980.30   28.30
   0  -4 -10  914.21   25.50
   0   4 -10  957.50   30.90
   0  -4 -10 1029.50   35.40
  -1   4  10   15.80    6.00
  -1   4  10    8.20    5.10
  -1  -4 -10   11.10    6.70
   1   4 -10   18.80    4.50
  -1  -4 -10   17.60    6.50
   1   4 -10   19.50    5.70
  -1  -4 -10   17.00    4.30
   1  -4  10   12.30    3.80
   1   4 -10   17.60    6.90
   1   4  10   23.30    6.80
  -1  -4  10   10.90    5.00
  -1   4 -10   19.90    7.60
   1   4  10   21.80    6.50
  -1   4 -10   25.30    4.10
  -1  -4  10   18.00    4.30
  -1   4 -10   11.70    4.20
   1  -4 -10    8.70    6.00
  -2   4  10   59.69   10.00
   2   4 -10   39.50    6.30
  -2   4  10   37.80    7.60
  -2  -4 -10   49.20    8.30
  -2  -4 -10   38.40    6.70
  -2  -4 -10   47.60    8.90
   2   4 -10   40.50    8.80
  -2   4 -10   46.20    5.20
  -2  -4  10   44.00    7.50
  -2   4 -10   34.90    8.20
   2  -4 -10   39.30    8.40
   2   4  10   41.50    8.50
   2   4  10   36.60    8.60
  -2   4 -10   36.20    5.30
  -3  -4 -10  107.79   10.80
  -3  -4 -10  120.59   11.20
   3   4 -10  137.09   12.90
  -3   4  10  134.09   12.50
  -3  -4 -10  132.09   13.20
  -3   4  10  111.49   11.00
   3   4 -10  132.49   10.80
  -3   4 -10  120.99    8.70
  -3   4 -10  126.39   12.20
  -3  -4  10  134.79   12.10
   3  -4 -10  135.79   12.80
   3   4  10  125.89   12.90
   3   4  10  130.49   12.90
  -4  -4 -10  263.07   17.30
   4   4 -10  262.67   16.60
  -4   4  10  254.87   15.30
  -4  -4 -10  310.47   19.60
  -4   4  10  273.97   18.90
  -4  -4 -10  278.97   16.10
   4   4  10  254.07   17.70
  -4   4 -10  251.47   13.70
  -4   4 -10  240.18   18.10
  -4   4 -10  262.87    9.10
  -4  -4  10  297.07   17.90
  -4   4 -10  262.87   17.00
   4   4  10  288.67   18.50
   4  -4 -10  289.97   18.00
   5   4 -10  169.58   13.10
  -5   4  10  161.68   12.90
  -5  -4 -10  175.38   16.10
  -5  -4 -10  137.99   15.90
  -5   4  10  161.68   15.20
  -5  -4 -10  169.28   13.10
  -5   4 -10  169.78   17.00
  -5   4 -10  141.29   12.90
   5   4  10  156.68   15.10
  -5  -4  10  181.58   17.50
  -5  -4  10  179.28   15.30
   5   4  10  163.08   14.80
   5  -4 -10  175.28   13.80
  -6   4  10   16.00    6.40
  -6  -4 -10    0.80    8.30
  -6  -4 -10   26.70    9.50
   6   4  10   15.30    8.70
  -6  -4  10   14.30   10.20
  -6   4 -10   18.30    8.40
   6   4  10   11.20    7.20
   6  -4 -10    1.10    6.00
  -6  -4  10   33.80    9.00
  -7   4  10    4.90    6.10
  -7  -4 -10   -1.00    7.60
  -7  -4 -10   14.10   10.40
  -7  -4  10   11.20    9.60
  -7   4 -10    9.90    8.90
   7   4  10    1.80    7.80
  -7  -4  10    3.70    7.30
   0  -5 -10   58.09    9.30
   0   5  10   64.19   10.50
   0   5  10   53.19    9.10
   0   5 -10   47.60    6.40
   0   5 -10   51.99   10.10
   0  -5 -10   54.59    9.70
   1   5 -10  361.86   16.30
   1   5 -10  387.86   21.60
  -1  -5 -10  354.96   14.40
  -1  -5 -10  432.16   21.50
  -1  -5 -10  360.16   20.20
  -1   5  10  371.46   20.40
  -1   5  10  370.76   19.40
   1   5  10  381.26   20.80
   1  -5 -10  349.96   20.20
  -1  -5  10  399.46   18.00
   1  -5 -10  357.86   18.40
   1   5  10  382.96   20.20
  -1   5 -10  359.76   15.40
  -1   5 -10  395.46   22.00
  -2   5  10  281.27   18.40
  -2   5  10  328.27   17.60
  -2  -5 -10  298.27   18.70
  -2  -5 -10  301.77   14.80
   2   5 -10  321.27   19.90
   2   5 -10  299.47   15.30
  -2  -5 -10  323.87   19.20
   2  -5 -10  306.87   18.80
  -2  -5  10  295.97   17.10
   2   5  10  325.97   19.40
   2   5  10  320.37   19.10
  -2   5 -10  315.47   20.60
  -2   5 -10  305.27   14.10
   3   5 -10   83.19   11.30
  -3  -5 -10  106.39   13.00
  -3   5  10   76.79    9.70
  -3  -5 -10   60.99   10.10
  -3  -5 -10   99.49   10.50
   3   5 -10   85.39    9.80
  -3   5  10   89.89   12.60
   3   5  10   83.79   12.40
   3  -5 -10   88.19   12.70
  -3   5 -10   94.09   13.30
  -3   5 -10   74.49    7.90
  -3  -5  10   61.49    9.60
   3   5  10   91.29   11.70
  -4  -5 -10   11.60    7.00
  -4  -5 -10   23.40    8.60
  -4  -5 -10   24.60    8.60
   4   5 -10   30.10    7.90
  -4   5  10   11.60    7.70
  -4   5  10   16.60    6.10
   4   5 -10   23.80    7.90
  -4   5 -10   20.80    5.60
   4  -5 -10   14.20    7.50
   4   5  10   27.20    8.60
  -4  -5  10   33.50    8.30
  -4   5 -10   26.70    8.20
   4   5  10   23.10    9.00
  -5  -5 -10   16.70    9.90
  -5   5  10   17.90    6.70
  -5  -5 -10   26.50    7.50
  -5  -5 -10   13.30    8.00
  -5   5  10   37.60   11.10
   5   5 -10   26.60    7.70
   5   5  10   28.60    9.40
  -5   5 -10   28.90    8.40
   5  -5 -10   27.90    9.00
   5   5  10   10.50    8.10
  -5   5 -10   40.80   10.30
  -5  -5  10   34.20    8.70
  -6  -5 -10  224.88   20.20
  -6  -5 -10  208.88   19.00
  -6   5  10  255.27   15.20
  -6   5  10  244.98   20.90
  -6   5 -10  254.77   20.40
  -6  -5  10  203.98   20.20
   6  -5 -10  212.68   15.80
   6   5  10  189.28   18.10
   6   5  10  235.28   19.10
  -6  -5  10  214.38   19.00
   0   6 -10   26.30    8.70
   0   6 -10   26.20    6.10
   0   6  10    7.70    6.80
   0  -6 -10   12.70    8.00
   0  -6 -10   23.80    6.90
   0   6  10   10.00    6.90
   1   6 -10  253.67   20.10
  -1  -6 -10  282.47   18.80
   1   6 -10  256.57   14.60
  -1   6  10  296.57   17.70
  -1   6  10  277.67   19.60
  -1  -6 -10  281.37   17.80
   1   6  10  289.77   20.10
   1  -6 -10  285.87   19.10
  -1   6 -10  259.77   14.20
  -1   6 -10  291.97   19.90
   1   6  10  298.27   18.70
  -2  -6 -10   20.60    8.30
  -2  -6 -10   28.90    9.40
   2   6 -10   27.30    9.30
  -2   6  10   21.40    6.80
   2   6 -10   19.50    6.30
  -2   6  10   15.80    7.60
  -2   6 -10    8.70    4.80
  -2   6 -10    2.10    8.00
   2  -6 -10   18.30    8.00
   2   6  10   27.30    9.00
   2   6  10    3.20    7.30
  -3  -6 -10   70.99   11.40
   3   6 -10   52.09   10.60
  -3   6  10   41.80    8.10
  -3  -6 -10   37.50    9.50
   3   6 -10   54.59    9.20
  -3   6  10   44.70   10.60
  -3   6 -10   54.29   11.30
   3   6  10   51.59   11.50
   3  -6 -10   44.10   10.30
   3   6  10   55.49   11.50
  -4  -6 -10   54.09   11.30
   4   6 -10   43.00   10.40
   4   6 -10   35.90    8.40
  -4   6  10   35.30    7.70
  -4   6  10   29.00   10.60
  -4  -6 -10   42.70    9.00
  -4  -6 -10   34.60   10.10
   4   6  10   28.10    9.90
   4  -6 -10   20.20    8.50
  -4   6 -10   16.20    8.40
  -4  -6  10   39.80    8.90
   4   6  10   32.70    9.70
  -5   6  10  125.49   15.20
  -5   6  10  127.59   11.90
  -5  -6 -10  128.79   14.50
  -5  -6 -10  110.39   13.60
  -5  -6 -10  142.59   17.10
   5   6 -10  127.79   13.90
   5  -6 -10  128.39   14.80
  -5  -6  10  127.39   15.50
  -5   6 -10  117.59   13.80
  -5   6 -10  121.59   14.60
   5   6  10  119.29   15.90
   5   6  10  119.99   15.30
  -6  -6 -10   14.00    9.00
  -6   6  10   -2.20    5.30
  -6  -6  10   13.80    8.90
  -6   6 -10    6.80    7.10
   0   7 -10   13.00    8.30
   0   7 -10   12.00    9.90
   0  -7 -10   13.40    8.60
   0   7  10    3.90    7.00
   0   7  10    4.70    7.10
   1   7 -10   21.90    9.50
  -1   7  10   30.30   10.30
  -1   7  10   43.00    9.60
   1   7 -10   30.90    7.20
  -1  -7 -10   24.60    9.70
  -1   7 -10   36.90   11.00
   1  -7 -10   25.60    9.10
   1   7  10   29.90    9.60
   1   7  10   13.30    8.40
   2   7 -10   19.40    9.40
  -2  -7 -10   -5.60    6.70
   2   7 -10   -4.20    5.40
  -2  -7 -10    1.00    7.60
  -2   7  10    3.50    6.30
  -2   7  10    2.40    7.30
   2   7  10    5.60    8.70
   2   7  10    2.30    6.60
  -2   7 -10    1.10    7.60
   2  -7 -10   22.10    9.10
   3   7 -10   19.20    7.40
  -3   7  10   27.10    9.80
  -3  -7 -10    2.00    7.50
  -3  -7 -10    6.40    7.70
   3   7 -10   29.90    9.90
  -3   7  10   17.10    7.00
  -3   7 -10   18.50   10.00
   3   7  10   24.90    9.00
   3  -7 -10   47.10   10.50
   3   7  10   25.70   10.00
   4   7 -10   -0.70    7.20
  -4  -7 -10   28.40   10.10
  -4   7  10    4.00    5.90
   4   7 -10   11.20    7.10
  -4  -7 -10   15.30    7.60
  -4   7  10    8.20    9.20
  -4   7 -10    8.40    8.70
   4  -7 -10   18.60    8.90
   4   7  10   11.60    9.00
   4   7  10    4.20    8.50
   0   8  10    7.90    7.00
   0   8  10   13.10    8.50
   0  -8 -10   17.90    9.30
   0   8 -10   22.90    9.80
  -1   8  10  156.38   18.10
   1   8 -10  196.88   18.70
  -1   8  10  182.18   15.70
  -1  -8 -10  174.68   18.80
   1   8  10  146.59   16.80
  -1   8 -10  169.48   18.70
   1  -8 -10  164.58   17.30
   1   8  10  145.39   15.20
   2   8 -10  103.99   16.20
  -2  -8 -10  112.79   15.70
  -2   8  10  115.39   14.10
   2  -8 -10  133.89   17.00
   0   0  11    3.40    2.20
   0   0  11   -3.80    3.70
   0   0 -11    3.90    4.80
   1   0  11  420.56   13.00
  -1   0 -11  404.76   17.30
   1   0  11  393.16   17.50
   1   0 -11  394.66   19.00
  -1   0  11  397.16   18.00
  -1   0 -11  400.46   12.80
  -1   0  11  408.96   14.30
  -1   0 -11  428.66   19.30
   2   0 -11   12.60    5.40
   2   0  11    9.30    4.90
  -2   0 -11    8.20    2.90
  -2   0 -11   19.10    5.70
  -2   0 -11   17.10    6.40
  -2   0  11   12.00    5.70
  -2   0 -11   17.10    4.60
   2   0  11   11.00    3.20
  -3   0 -11  174.28    9.40
  -3   0 -11  192.18   12.50
  -3   0 -11  167.68   13.70
  -3   0 -11  174.48   11.20
  -3   0  11  181.88   12.80
  -3   0 -11  164.78   11.60
   3   0 -11  173.58   12.50
   3   0  11  194.48   11.80
  -4   0 -11   78.19   11.00
   4   0  11   67.29    8.60
  -4   0 -11   80.59    9.60
  -4   0  11   72.49   10.30
  -4   0 -11   87.69    8.90
  -4   0  11   81.49    9.40
   4   0 -11   71.59    9.00
  -4   0 -11   76.39    8.40
  -5   0  11   81.69   10.50
  -5   0 -11   82.79   12.30
  -5   0  11   75.09   10.90
   5   0  11   62.59    8.60
  -5   0 -11   80.59   10.30
  -5   0 -11   84.79    8.30
   5   0 -11   84.79    9.10
  -6   0 -11   23.60    9.40
  -6   0 -11   19.20    7.20
  -6   0  11   14.60    6.70
  -6   0  11   16.30    7.20
   6   0 -11   23.80    8.30
  -7   0  11   87.99   13.30
  -7   0 -11   75.49   14.50
  -7   0  11   89.09   13.20
  -7   0 -11   57.79   10.10
  -8   0  11    8.50    8.90
  -8   0 -11   16.40    7.80
   0   1  11  282.57   12.00
   0   1 -11  281.47   13.70
   0  -1  11  283.77   14.00
   0   1 -11  302.57   15.90
   0  -1 -11  260.57   15.10
   0   1  11  293.27   14.90
  -1   1  11    9.30    4.80
   1  -1  11   16.90    4.50
  -1  -1 -11    8.50    4.50
   1   1 -11    4.50    5.00
  -1  -1 -11    3.20    4.60
  -1  -1 -11   16.70    3.80
  -1   1  11   11.60    4.10
   1   1  11   10.50    4.80
  -1  -1  11    6.90    2.60
  -1   1 -11    3.10    4.90
   1   1  11   10.10    3.60
   1  -1 -11    1.10    4.50
  -1   1 -11   15.40    4.60
  -1  -1  11    6.00    4.50
  -2  -1 -11 1095.39   32.60
  -2  -1 -11 1101.79   36.30
  -2  -1 -11 1032.80   35.90
   2   1 -11 1047.60   36.30
  -2   1  11 1051.69   36.10
   2  -1  11 1092.99   33.90
  -2   1 -11 1116.59   34.00
   2  -1 -11 1035.60   36.50
  -2   1 -11 1096.99   29.20
   2  -1 -11 1112.29   33.10
   2   1  11 1130.49   36.20
  -2  -1  11 1147.49   32.40
   2   1  11 1118.29   32.90
  -2  -1  11 1152.18   36.80
  -2   1 -11 1100.99   36.40
   3  -1  11  153.68   10.00
  -3  -1 -11  167.28   12.50
   3   1 -11  131.99   11.50
  -3  -1 -11  126.29   12.20
  -3  -1 -11  134.89   10.70
  -3   1  11  133.69   11.20
   3   1  11  148.39    9.70
  -3   1 -11  139.79    7.60
  -3   1 -11  147.29   12.90
   3   1  11  132.79   10.80
   3  -1 -11  122.89    9.00
  -3   1 -11  135.49   10.60
   3  -1 -11  161.98   11.70
  -3  -1  11  136.79   11.60
  -3   1 -11  135.39    9.20
   4   1 -11  696.23   26.00
   4  -1  11  677.93   24.00
  -4  -1 -11  659.13   26.90
  -4  -1 -11  719.53   29.70
  -4  -1 -11  693.63   22.60
  -4  -1 -11  677.33   24.60
  -4   1  11  648.54   27.00
  -4   1  11  688.93   25.20
  -4   1 -11  670.53   23.70
   4   1  11  694.53   26.70
  -4  -1  11  638.44   27.10
   4   1  11  638.14   24.70
  -4   1 -11  626.94   24.80
  -4  -1  11  635.84   27.40
  -4   1 -11  652.03   24.60
   4  -1 -11  680.13   26.50
  -4   1 -11  657.93   29.20
  -5  -1 -11  108.59    7.50
  -5   1  11   97.99   11.10
  -5   1  11  119.89   11.10
   5   1 -11  111.59   10.20
  -5  -1 -11   88.49   12.10
  -5  -1 -11  125.69    9.40
  -5  -1 -11  114.59   13.10
  -5  -1  11  120.59   12.40
   5   1  11  125.29   11.60
  -5   1 -11   86.49    8.90
  -5  -1  11   96.69   12.90
  -5   1 -11  101.79   10.20
  -5   1 -11  127.29   14.10
   5  -1 -11  102.49   10.20
  -6   1  11  212.28   15.00
  -6  -1 -11  193.48   15.10
  -6   1  11  182.28   15.40
  -6  -1 -11  198.08   17.60
  -6   1 -11  193.88   13.20
  -6  -1  11  172.68   16.60
  -6  -1  11  194.28   15.80
  -6   1 -11  217.68   18.40
  -7   1  11   41.80   10.00
  -7  -1 -11   46.60   10.00
  -7   1  11   46.10    9.90
  -7  -1 -11   55.59   12.60
  -7  -1  11   66.09   12.10
  -7   1 -11   46.30   12.00
  -7   1 -11   35.20    8.00
  -7  -1  11   38.60    9.90
  -8  -1 -11  199.68   17.50
  -8  -1  11  195.18   18.10
  -8   1 -11  203.18   14.60
   0  -2  11   26.40    5.70
   0  -2 -11   17.30    6.20
   0   2 -11   17.40    4.70
   0   2  11   24.00    6.20
   0   2 -11   20.60    6.30
   0  -2 -11   24.00    4.40
   0   2  11   24.00    5.40
  -1   2  11  370.96   17.90
  -1   2  11  414.06   17.20
  -1  -2 -11  402.76   16.50
   1  -2  11  412.76   16.30
   1   2 -11  380.96   19.20
  -1  -2 -11  401.16   19.10
  -1  -2  11  390.46   12.70
  -1  -2  11  374.26   17.30
  -1   2 -11  385.36   19.20
   1   2  11  368.06   18.10
   1   2  11  370.56   16.40
   1  -2 -11  381.36   19.20
   1  -2 -11  396.16   13.90
  -1   2 -11  401.96   16.20
  -2  -2 -11  464.75   21.40
  -2  -2 -11  493.75   21.30
   2   2 -11  508.35   21.70
  -2  -2 -11  488.75   20.10
  -2   2  11  434.96   19.20
  -2   2  11  467.05   20.70
   2  -2  11  453.95   17.40
  -2  -2 -11  480.05   19.60
   2  -2 -11  464.25   15.50
  -2  -2  11  449.66   20.20
  -2   2 -11  466.25   17.60
   2   2  11  469.25   18.80
  -2   2 -11  452.35   21.40
  -2   2 -11  463.85   13.40
   2  -2 -11  454.55   21.20
  -2   2 -11  450.85   13.40
   2   2  11  444.76   20.50
  -2  -2  11  468.25   16.70
  -3  -2 -11   22.80    7.00
  -3  -2 -11   24.30    7.00
   3  -2  11   15.30    4.00
  -3   2  11   22.40    6.10
  -3  -2 -11   16.50    5.70
   3   2 -11   17.20    5.90
  -3  -2 -11   17.80    5.30
   3   2  11   11.40    6.50
  -3   2 -11   13.90    5.50
   3  -2 -11   20.70    6.60
  -3  -2  11   10.50    6.30
  -3   2 -11   19.40    4.50
  -3   2 -11   15.10    3.30
   3  -2 -11   21.30    4.20
   3   2  11   20.70    5.80
  -4  -2 -11  137.79   13.50
  -4   2  11  151.78    9.80
  -4  -2 -11  152.78   13.20
  -4   2  11  119.89   11.30
  -4  -2 -11  146.99   10.20
   4   2 -11  144.39   11.90
  -4  -2 -11  138.89   10.80
  -4  -2  11  154.48   14.90
  -4   2 -11  143.59   10.10
  -4  -2  11  154.38   13.90
   4   2  11  138.49   11.70
  -4   2 -11  178.78   15.20
   4  -2 -11  145.79   12.70
  -4   2 -11  128.09   11.10
   4   2  11  130.69   12.20
  -5  -2 -11   45.80   10.00
  -5  -2 -11   47.00    9.70
  -5   2  11   27.60    7.20
  -5   2  11   42.30    7.20
  -5  -2 -11   39.10    6.10
   5   2 -11   43.30    7.90
   5   2  11   27.10    7.70
  -5   2 -11   36.80    6.40
  -5   2 -11   36.10    9.80
  -5  -2  11   34.20    8.50
  -5  -2  11   37.00   10.40
  -5   2 -11   36.30    7.40
   5   2  11   27.30    7.60
  -6   2  11   12.90    6.40
  -6  -2 -11   14.70    8.10
  -6   2  11   20.10    7.50
  -6  -2 -11   21.60    7.70
  -6   2 -11   24.70    6.00
  -6  -2  11   15.10    7.70
  -6  -2  11   12.20    8.60
   6   2  11    7.60    5.90
  -6   2 -11   12.40    8.50
  -7  -2 -11    5.80    8.00
  -7  -2 -11   -1.30    6.80
  -7   2  11   14.10    6.80
  -7  -2  11   10.50    8.10
  -7   2 -11    1.70    4.90
  -7   2 -11    5.50    9.50
  -7  -2  11    6.30    7.50
  -8  -2  11  117.69   16.30
  -8   2 -11  117.99   12.10
   0  -3  11  240.68   12.70
   0  -3 -11  225.78   14.50
   0  -3 -11  228.28   15.40
   0  -3 -11  237.78    9.80
   0   3 -11  237.88    8.10
   0   3  11  234.98   14.50
   0   3  11  244.18   13.70
   0   3 -11  203.88   14.70
   0   3 -11  222.08   12.50
   1  -3  11  309.67   13.40
   1   3 -11  280.77   16.80
  -1  -3 -11  286.97   16.90
  -1  -3 -11  292.77   13.20
  -1   3  11  280.87   15.70
  -1   3  11  296.57   15.90
  -1  -3 -11  305.87   16.20
  -1  -3  11  299.67   15.50
   1  -3 -11  309.27    8.90
   1   3  11  270.57   15.00
  -1  -3  11  287.97   11.30
   1   3  11  289.77   16.50
  -1   3 -11  284.77   17.10
  -1   3 -11  300.07    9.10
  -1   3 -11  293.07   13.40
   1  -3 -11  298.37    8.90
  -2  -3 -11   83.89    9.30
  -2  -3 -11   99.99    8.80
   2  -3  11   84.69    6.60
  -2  -3 -11   98.89   11.80
   2   3 -11   72.79    9.70
  -2   3  11   92.89   10.20
  -2   3  11   79.19    9.20
  -2   3 -11   74.99   10.20
   2   3  11   93.29   10.50
  -2  -3  11   84.99    7.00
  -2   3 -11   80.99    5.30
  -2   3 -11   77.49    6.90
   2   3  11   77.89    8.70
  -2  -3  11   80.49   10.20
  -3   3  11  319.87   18.20
  -3  -3 -11  318.77   16.20
  -3  -3 -11  280.17   16.20
   3   3 -11  284.07   17.20
  -3  -3 -11  258.57   17.10
  -3   3  11  273.37   15.80
  -3   3 -11  285.87   12.20
  -3   3 -11  303.07   17.10
   3   3  11  273.77   17.30
  -3   3 -11  289.57   12.40
  -3  -3  11  335.47   17.80
   3   3  11  299.97   16.30
  -4  -3 -11  112.79   13.00
  -4   3  11  136.39   13.60
  -4  -3 -11  121.79   12.30
   4   3 -11  135.09   12.20
  -4  -3 -11  128.79   11.10
  -4   3  11  127.69   12.10
   4   3  11  153.08   13.60
  -4   3 -11  145.49   14.80
   4   3  11  146.49   12.30
  -4   3 -11  134.59   12.20
  -4   3 -11  135.19    8.60
  -4  -3  11  144.39   13.90
  -5  -3 -11  243.28   13.90
  -5  -3 -11  217.88   17.80
   5   3 -11  223.48   14.60
  -5   3  11  215.48   15.30
  -5  -3 -11  239.68   17.30
  -5   3 -11  233.38   15.20
   5   3  11  241.38   16.70
  -5  -3  11  252.27   17.70
  -5   3 -11  217.68   18.10
   5   3  11  240.68   17.70
  -5  -3  11  221.68   18.30
  -5   3 -11  216.48   10.90
  -6  -3 -11  160.38   16.20
  -6   3  11  190.78   14.80
  -6  -3 -11  179.78   16.30
  -6   3 -11  193.08   10.00
   6  -3 -11  185.18   14.70
  -6   3 -11  179.98   17.60
   6   3  11  200.28   16.40
  -6  -3  11  196.48   18.30
   6   3  11  171.78   16.10
  -6  -3  11  156.18   16.70
  -7   3  11   63.39   10.50
  -7  -3 -11   74.49   13.80
  -7  -3 -11   98.09   14.60
  -7   3 -11   88.09   15.70
  -7  -3  11   69.09   12.60
  -7  -3  11   76.29   15.00
   0  -4 -11   47.20    3.80
   0  -4 -11   34.20    8.10
   0   4 -11   38.60    8.90
   0  -4  11   52.49    6.90
   0   4  11   28.80    7.30
   0   4 -11   49.99    7.10
   0   4  11   47.30    8.50
   0   4 -11   51.99    5.20
   0  -4  11   41.30    5.10
  -1   4  11  457.85   21.90
  -1  -4 -11  472.35   17.30
   1   4 -11  502.45   17.40
   1  -4  11  484.05   18.00
   1   4 -11  456.65   23.10
  -1  -4 -11  462.55   22.20
  -1  -4 -11  512.95   23.20
  -1   4  11  517.55   23.20
  -1  -4  11  504.55   20.70
   1   4  11  447.36   22.10
  -1   4 -11  458.95   15.80
   1  -4 -11  470.35   22.70
  -1   4 -11  467.25   23.60
  -1   4 -11  514.05   18.70
  -1  -4  11  471.95   17.50
   1   4  11  507.75   23.00
  -2   4  11  108.39   11.50
  -2  -4 -11   87.19   10.50
   2   4 -11  116.69   12.20
  -2  -4 -11  129.99   10.00
  -2   4  11  134.89   11.30
   2   4 -11  114.39    8.80
  -2  -4 -11  112.69   12.40
   2   4  11  127.69   12.40
  -2   4 -11  118.39   13.70
  -2  -4  11  117.69   10.90
   2  -4 -11  122.69   12.20
  -2   4 -11  108.49    7.20
   2   4  11  114.09   12.00
  -3   4  11   17.60    6.90
   3   4 -11    7.90    6.00
  -3  -4 -11   17.70    7.50
  -3   4  11   26.60    7.30
  -3  -4 -11   11.50    6.50
  -3  -4 -11   15.10    6.20
  -3   4 -11   12.30    3.90
  -3  -4  11    7.10    5.60
   3   4  11    3.40    6.20
   3  -4 -11   10.20    6.20
   3   4  11   13.70    6.40
  -3   4 -11   13.20    7.10
  -4   4  11    3.30    5.00
  -4  -4 -11    2.70    6.10
   4   4 -11    7.00    6.20
  -4   4  11   -6.40    5.40
  -4  -4 -11   -3.10    5.10
  -4  -4 -11    1.60    6.70
   4   4  11    5.20    6.70
   4   4  11    2.50    6.20
  -4   4 -11   -4.80    6.90
  -4   4 -11    6.10    6.30
  -4   4 -11    3.90    2.40
  -4   4 -11   -4.00    3.30
   4  -4 -11    9.00    6.60
  -4  -4  11  -11.10    5.10
  -5  -4 -11    8.10    7.60
  -5   4  11   31.10    9.60
  -5  -4 -11   21.10    7.10
  -5   4  11   34.60    8.20
   5   4 -11   19.90    6.90
  -5  -4 -11   22.20    8.50
   5  -4 -11    9.00    6.50
   5   4  11   23.20    8.30
  -5   4 -11   19.80    7.20
  -5   4 -11   27.80    6.40
  -5  -4  11   29.20   10.80
  -5   4 -11   32.20   10.70
  -5  -4  11   38.50    9.30
   5   4  11   14.30    8.20
  -6   4  11   29.70    7.80
  -6   4  11   37.50   10.60
  -6  -4 -11   25.80   10.10
  -6  -4 -11   17.80    8.80
  -6   4 -11   55.29   12.00
   6   4  11   39.50   10.50
   6  -4 -11   40.10    9.20
  -6  -4  11   47.50   12.10
  -6  -4  11   34.80    9.70
   6   4  11   35.30   10.20
  -7   4  11    8.70    6.80
  -7  -4 -11    5.50    8.90
  -7   4 -11   10.00    9.10
  -7  -4  11    0.30    8.60
   7   4  11   -2.20    7.30
   0  -5 -11   20.30    7.90
   0   5  11   15.50    6.70
   0   5 -11    4.60    6.60
   0   5 -11   12.90    4.20
   0   5  11   13.30    6.90
   0  -5 -11   15.40    7.20
  -1  -5 -11   11.10    6.70
  -1   5  11   25.30    7.40
  -1  -5 -11   17.00    7.60
   1   5 -11    5.30    7.20
   1   5 -11   14.80    4.70
  -1   5  11   16.70    7.20
  -1  -5  11   35.20    7.00
  -1   5 -11   20.10    4.50
   1   5  11   21.30    8.50
   1  -5 -11   16.40    6.30
  -1   5 -11   18.80    9.00
   1  -5 -11   21.70    8.20
   1   5  11   20.10    7.20
  -2   5  11   39.00    8.30
   2   5 -11   23.90    5.90
  -2  -5 -11   51.89    9.70
   2   5 -11   24.40    8.90
  -2   5  11   22.70    7.80
  -2  -5 -11   35.90    9.30
  -2  -5 -11   38.60    6.60
   2  -5 -11   39.30    9.10
   2   5  11   31.40    8.70
  -2   5 -11   42.50    6.00
  -2  -5  11   27.10    6.80
   2   5  11   48.20   10.30
  -2   5 -11   31.60    8.90
  -3  -5 -11   17.60    7.90
  -3   5  11   39.50    9.50
   3   5 -11   34.50    7.20
   3   5 -11   44.20    9.40
  -3  -5 -11   17.40    7.30
  -3   5  11   32.50    7.70
  -3  -5 -11   28.00    7.20
   3  -5 -11   49.20   10.50
  -3  -5  11   28.20    8.40
  -3   5 -11   54.19   10.80
   3   5  11   49.70   10.40
  -3   5 -11   47.30    7.70
   3   5  11   24.20    8.00
  -4  -5 -11    1.00    6.70
   4   5 -11   20.00    7.30
  -4  -5 -11   18.40    7.70
  -4   5  11   26.90    9.70
  -4   5  11    8.10    5.70
  -4  -5 -11   13.20    6.60
   4  -5 -11   22.50    8.60
  -4  -5  11   13.40    6.90
   4   5  11   22.50    8.70
   4   5  11   10.00    7.30
  -4   5 -11   22.40    8.60
   5   5 -11   12.70    7.40
  -5  -5 -11   18.20    7.80
  -5  -5 -11    9.50    7.20
  -5  -5 -11   13.00    8.70
  -5   5  11   21.90    8.80
  -5   5  11    7.20    5.80
  -5   5 -11   19.10    8.20
   5   5  11   10.80    8.70
   5  -5 -11   19.70    7.50
   5   5  11    9.80    7.50
  -5  -5  11   17.10    8.00
  -5   5 -11   18.80    7.60
  -6   5  11   17.50    6.80
  -6   5  11   22.70    9.50
  -6  -5 -11   18.60    9.10
  -6  -5 -11   22.80    9.30
   6  -5 -11   17.30    8.60
  -6  -5  11   12.50    9.10
  -6  -5  11   14.20    8.80
   6   5  11   22.00    9.00
  -6   5 -11   16.30    9.20
   6   5  11   21.60    9.70
   0   6  11   18.70    7.90
   0   6 -11   12.10    8.10
   0   6  11   15.70    8.00
   0  -6 -11   13.10    7.80
   0  -6 -11   19.10    7.50
   0   6 -11   12.60    5.00
  -1  -6 -11   45.60   10.80
  -1   6  11   42.90    8.90
  -1   6  11   43.70   10.00
   1   6 -11   34.60    6.80
  -1  -6 -11   45.40    9.70
   1   6 -11   38.30    9.90
   1  -6 -11   47.90   10.60
  -1   6 -11   53.79   11.30
   1   6  11   40.90    9.50
   1   6  11   40.20   10.20
   2   6 -11   -6.40    6.50
   2   6 -11    3.50    4.90
  -2  -6 -11    5.00    6.50
  -2   6  11   -0.30    5.80
  -2   6  11    8.90    7.60
  -2  -6 -11   -0.20    6.50
   2   6  11    8.50    7.60
  -2   6 -11   -1.20    8.10
   2  -6 -11    3.90    6.40
   2   6  11    1.00    7.40
  -3  -6 -11   20.10    9.30
  -3  -6 -11   14.90    7.70
  -3   6  11   28.50    7.50
   3   6 -11   18.90    8.70
  -3   6  11    5.20    7.00
   3   6 -11    5.30    5.90
   3  -6 -11   16.20    8.60
   3   6  11    5.40    7.20
   3   6  11   16.60    8.00
  -3   6 -11    9.70    7.70
  -4   6  11   16.90    8.80
   4   6 -11   15.00    8.40
   4   6 -11   27.30    7.80
  -4  -6 -11   18.30    8.20
  -4   6  11   25.20    7.70
  -4  -6 -11   40.50   10.50
   4   6  11   15.50    9.40
   4   6  11   28.90    9.30
  -4  -6  11    0.30    7.90
  -4   6 -11   14.70    8.70
   4  -6 -11   32.70    9.50
  -5  -6 -11    3.50    6.90
   5   6 -11    3.00    6.90
  -5   6  11    4.50    5.60
  -5  -6 -11   10.70    7.30
  -5   6  11   -4.10    6.90
  -5  -6 -11    0.80    7.80
  -5  -6  11    1.50    7.60
  -5   6 -11    5.20    7.10
   5  -6 -11   10.40    7.60
   5   6  11    1.70    7.10
  -5   6 -11    2.00    7.30
   5   6  11   15.20    8.20
   0  -7 -11   98.69   14.10
   0   7  11  136.99   15.00
   0   7 -11  106.69   15.40
   0   7  11  137.99   16.00
   1   7 -11  140.19   17.70
  -1   7  11  135.89   14.30
  -1   7  11  126.89   15.10
  -1  -7 -11  139.79   15.60
  -1   7 -11  157.48   17.30
   1   7  11  157.48   15.90
   1  -7 -11  113.19   14.50
   1   7  11  143.69   16.50
   2   7 -11    4.60    7.80
  -2   7  11    2.80    6.30
  -2  -7 -11    5.60    7.70
  -2   7  11   16.40    9.40
  -2  -7 -11    2.40    7.00
   2   7  11   16.40    9.80
   2   7  11    4.00    6.70
   2  -7 -11    0.40    7.40
  -2   7 -11   10.60   10.00
  -3  -7 -11   79.29   13.70
  -3   7  11   73.19   13.10
  -3   7  11   80.39   11.20
  -3  -7 -11   57.89   11.40
   3   7 -11   96.49   13.80
   3  -7 -11  111.09   15.40
  -3   7 -11   70.99   13.50
   3   7  11   94.49   14.20
   3   7  11   60.59   12.20
  -4  -7 -11  108.79   15.40
  -4  -7 -11  154.98   16.60
   4   7 -11  124.19   14.70
  -4   7  11  162.18   14.20
   4   7  11  170.18   28.00
  -4   7 -11  132.99   17.10
   4   7  11  163.28   27.30
   4  -7 -11  145.79   15.80
   0  -8 -11  303.57   22.30
   0   8  11  294.37   23.30
  -1   8  11    8.70    7.40
  -1  -8 -11   -8.70    8.40
   1  -8 -11    2.70    8.00
  -2   8  11   10.70    7.80
  -2  -8 -11   12.10    9.50
   0   0 -12 4016.30  108.89
   0   0  12 4080.19  107.29
   0   0  12 4039.20  100.49
  -1   0  12   33.10    6.80
   1   0  12   33.90    3.80
   1   0  12   39.40    7.00
  -1   0  12   35.40    4.80
   1   0 -12   23.80    6.40
  -1   0 -12   26.10    6.50
  -1   0 -12   28.40    3.50
   2   0  12  375.36   17.40
  -2   0 -12  406.96   19.50
  -2   0  12  402.86   18.90
  -2   0 -12  402.46   17.70
   2   0 -12  418.96   19.90
   2   0  12  390.76   13.80
  -2   0 -12  399.06   18.80
  -2   0 -12  391.26   13.70
  -3   0 -12  169.78   12.50
   3   0  12  174.78   11.80
  -3   0 -12  178.98    9.40
  -3   0  12  165.98   12.80
   3   0 -12  194.08   13.00
  -3   0 -12  163.18   10.90
  -3   0 -12  152.28   12.90
  -4   0  12 1099.49   38.30
  -4   0 -12 1095.19   35.90
  -4   0 -12 1099.69   40.50
   4   0  12 1088.19   36.20
  -4   0 -12 1086.49   36.70
   4   0 -12 1062.39   36.70
  -4   0 -12 1057.99   35.70
  -5   0  12   -0.40    5.40
  -5   0 -12   -0.40    5.30
  -5   0  12   10.60    6.50
  -5   0 -12    3.00    4.30
   5   0 -12    8.00    5.20
  -5   0 -12    3.60    6.40
  -6   0 -12  178.28   17.10
   6   0 -12  192.48   18.20
  -6   0 -12  176.18   14.30
  -6   0  12  188.98   15.70
  -6   0  12  181.48   15.70
  -7   0  12    9.80    7.70
  -7   0 -12    3.80    6.20
  -7   0  12    7.80    8.30
  -7   0 -12    7.80    8.30
  -8   0 -12   51.19   10.50
  -8   0  12   30.80   10.50
   0   1  12   59.59    6.20
   0  -1 -12   45.60    7.90
   0   1  12   57.19    8.10
   0   1 -12   59.29   11.50
   0  -1  12   71.59    8.40
   0   1 -12   59.29    9.00
  -1  -1 -12   24.30    4.30
  -1   1  12   17.00    4.40
  -1  -1 -12   11.80    5.10
   1  -1  12   20.70    5.30
   1   1 -12   24.70    6.90
  -1   1  12   17.00    6.10
  -1  -1 -12   14.90    6.00
   1   1  12   21.70    4.20
  -1   1 -12   13.50    4.90
  -1   1 -12   14.10    6.10
   1   1  12   13.90    5.60
  -1  -1  12   14.90    2.90
  -1  -1  12    9.20    5.10
   1  -1 -12   13.10    5.80
  -2  -1 -12   88.29    7.30
  -2  -1 -12   92.49   10.20
  -2  -1 -12   83.69    9.10
  -2   1  12   79.49    7.80
   2   1 -12   98.39   10.70
   2  -1  12   85.39    8.30
  -2   1  12   81.59   10.00
  -2  -1  12   89.39    9.60
  -2   1 -12   82.29    8.10
  -2  -1  12   74.79    6.70
   2  -1 -12   83.09    9.80
   2   1  12   84.69    7.20
  -2   1 -12   81.79    4.30
  -2   1 -12   96.89   10.10
   2   1  12   77.29    9.60
   2  -1 -12   88.09    7.50
  -3  -1 -12   60.09    9.30
  -3  -1 -12   62.99    8.90
  -3   1  12   45.80    8.00
   3  -1  12   77.39    7.90
  -3  -1 -12   82.49   10.30
   3   1 -12   76.79    9.30
  -3   1 -12   76.19    7.60
  -3  -1  12   81.79    9.90
   3   1  12   57.89    8.30
  -3   1 -12   57.99   10.20
  -3   1 -12   67.49    5.40
   3  -1 -12   58.29    8.80
  -3   1 -12   80.29    9.60
   3   1  12   64.89    7.60
   4   1 -12  647.24   25.30
  -4  -1 -12  587.44   25.50
  -4  -1 -12  595.14   23.60
   4  -1  12  595.04   22.70
  -4  -1 -12  595.74   21.50
  -4   1  12  606.74   26.20
  -4  -1 -12  620.64   27.70
  -4   1 -12  585.94   23.60
   4   1  12  636.74   25.60
  -4  -1  12  580.54   26.00
   4   1  12  583.34   23.20
   4  -1 -12  643.84   25.80
  -4   1 -12  641.64   29.10
  -4   1 -12  651.53   24.60
   5   1 -12   10.20    5.40
  -5  -1 -12    2.50    4.50
  -5   1  12    6.90    5.80
  -5  -1 -12    2.30    7.10
  -5   1  12    4.20    5.70
  -5  -1 -12    0.50    6.00
   5   1  12    4.40    5.30
  -5  -1  12  -10.20    6.30
  -5   1 -12    0.40    4.20
  -5   1 -12    1.50    5.00
  -5   1 -12    7.20    7.60
  -5  -1  12    4.90    6.20
   5  -1 -12   -4.60    4.30
  -6  -1 -12   68.89   11.40
  -6  -1 -12   73.79   13.40
  -6   1  12   78.29   12.00
  -6   1  12   61.99   10.30
  -6   1 -12   79.79   10.50
  -6  -1  12   59.99   11.20
  -6  -1  12   56.49   11.00
  -6   1 -12   87.89   13.40
  -7  -1 -12   29.70   10.60
  -7   1  12   26.50    9.20
  -7   1  12   21.10    8.60
  -7  -1 -12   15.60    8.20
  -7   1 -12   35.40    7.70
  -7  -1  12   55.59   11.60
  -7   1 -12   42.50   11.80
  -7  -1  12   28.30    9.50
  -8   1 -12  109.19   12.10
  -8  -1  12  104.09   14.50
   0   2  12 1939.81   57.29
   0  -2 -12 1817.72   57.79
   0   2 -12 1880.11   58.29
   0  -2  12 1947.41   55.39
   0   2 -12 2055.79   55.59
   0  -2 -12 1924.21   52.69
   0   2  12 1879.11   54.19
  -1   2  12  176.08   11.20
  -1  -2 -12  163.38   10.50
  -1   2  12  155.38   12.10
   1   2 -12  188.18   13.50
  -1  -2 -12  148.09   12.30
   1  -2  12  162.28   10.60
   1  -2 -12  168.78   13.30
  -1   2 -12  185.28   10.90
  -1  -2  12  163.68   11.50
  -1  -2  12  170.48    7.00
   1  -2 -12  174.88    8.80
  -1   2 -12  159.98   12.90
   1   2  12  167.88   10.60
   1   2  12  171.88   12.60
  -2  -2 -12  580.14   23.10
   2   2 -12  550.04   24.30
  -2  -2 -12  609.64   23.40
  -2  -2 -12  589.64   24.80
  -2   2  12  581.14   22.90
   2  -2  12  581.44   20.90
  -2   2  12  541.15   23.50
  -2  -2  12  581.84   24.10
  -2   2 -12  604.04   21.20
  -2  -2  12  584.14   19.40
   2   2  12  603.64   22.10
   2  -2 -12  566.34   18.80
  -2   2 -12  591.54   25.30
   2   2  12  560.44   24.10
   2  -2 -12  572.14   25.00
   3  -2  12  491.65   18.50
  -3   2  12  512.65   22.20
   3   2 -12  519.35   23.10
  -3   2  12  500.45   22.20
  -3  -2 -12  490.55   20.40
  -3  -2 -12  517.15   23.80
  -3  -2 -12  523.55   22.30
  -3  -2 -12  478.55   22.50
  -3   2 -12  498.15   22.60
   3  -2 -12  477.45   22.50
  -3   2 -12  499.55   16.20
  -3  -2  12  461.25   22.50
   3   2  12  479.15   20.50
   3   2  12  524.75   23.20
   3  -2 -12  480.15   17.50
  -3   2 -12  518.65   18.90
  -4  -2 -12 1294.57   40.00
   4   2 -12 1250.17   42.70
  -4   2  12 1304.47   43.80
  -4  -2 -12 1347.37   45.00
  -4  -2 -12 1251.37   44.70
  -4  -2 -12 1322.97   42.00
  -4   2 -12 1280.07   46.80
   4   2  12 1352.66   42.50
  -4  -2  12 1345.27   45.50
   4   2  12 1336.17   44.80
  -4   2 -12 1311.67   42.90
  -4   2 -12 1327.97   39.80
   4  -2 -12 1322.77   44.20
  -5  -2 -12  412.06   23.50
  -5  -2 -12  392.66   16.30
  -5   2  12  370.06   17.70
  -5  -2 -12  373.46   21.40
   5   2 -12  379.36   19.10
  -5   2  12  411.56   21.10
  -5   2 -12  391.56   23.40
  -5   2 -12  367.26   18.60
   5   2  12  374.06   20.90
  -5   2 -12  351.16   16.70
   5   2  12  371.46   19.30
  -5  -2  12  396.66   23.30
  -5  -2  12  362.36   21.20
  -6  -2 -12  149.69   15.70
  -6   2  12  165.48   14.70
  -6  -2 -12  183.78   16.70
  -6  -2  12  185.98   16.20
  -6   2 -12  162.58   11.50
  -6  -2  12  197.38   18.50
  -6   2 -12  168.58   17.20
  -7  -2 -12   24.80    9.60
  -7  -2 -12   37.00   11.50
  -7   2  12   27.20    8.50
  -7  -2  12   22.30    8.70
  -7   2 -12   15.10    6.00
  -7  -2  12   11.80    8.80
  -7   2 -12   26.00   10.30
   0  -3 -12  415.56   21.80
   0   3  12  455.95   21.30
   0   3  12  453.45   20.00
   0  -3 -12  464.15   21.50
   0   3 -12  492.25   19.50
   0  -3 -12  452.15   15.70
   0   3 -12  453.55   22.60
   0  -3  12  448.06   18.80
  -1   3  12   16.00    5.80
   1  -3  12   13.40    4.40
  -1  -3 -12    9.80    5.90
  -1  -3 -12   15.60    4.60
  -1   3  12   14.40    5.70
  -1  -3 -12   19.20    7.00
   1   3 -12   13.80    6.40
   1  -3 -12    7.40    6.40
  -1   3 -12    6.90    6.70
   1  -3 -12    7.30    2.20
  -1  -3  12    8.50    4.60
   1  -3 -12   11.00    2.40
  -1   3 -12    7.80    4.30
   1   3  12    6.60    5.60
   1   3  12    9.80    5.20
  -1  -3  12   14.30    3.10
   2   3 -12    4.40    5.90
  -2  -3 -12    1.90    6.00
  -2  -3 -12    4.40    4.50
  -2  -3 -12   -1.50    4.20
  -2   3  12    0.20    4.60
  -2   3  12   11.20    5.40
   2  -3  12    6.40    3.40
  -2   3 -12    7.10    1.90
  -2  -3  12    6.90    3.30
  -2   3 -12   -2.00    1.70
  -2   3 -12    2.40    3.30
   2   3  12   -6.40    4.10
  -2  -3  12    3.80    5.00
  -2   3 -12   -1.20    5.20
   2   3  12    1.80    5.40
   3   3 -12   93.79   10.80
  -3   3  12   91.59   10.50
  -3  -3 -12  109.69   12.30
  -3  -3 -12   87.69    9.90
  -3  -3 -12  102.89   10.90
  -3   3  12   93.99   10.90
  -3   3 -12  100.79   11.20
   3   3  12   93.89   11.60
  -3   3 -12   95.19    6.60
   3   3  12  102.69   10.90
  -3  -3  12  102.79   12.10
  -4   3  12   92.99   12.00
  -4  -3 -12   57.39   10.50
   4   3 -12  103.19   11.30
  -4  -3 -12   88.99    9.60
  -4   3  12   68.49   10.30
  -4  -3 -12   69.39   10.90
   4   3  12   78.39   10.90
  -4   3 -12   77.29   10.60
  -4   3 -12   88.99    7.60
   4   3  12   59.39   10.00
  -4   3 -12   78.09   12.60
  -4  -3  12   93.59   11.70
  -5  -3 -12   50.69   10.50
  -5   3  12   50.89    8.90
   5   3 -12   63.09    9.60
  -5  -3 -12   66.99    8.70
  -5  -3 -12   80.19   11.90
  -5  -3  12   66.49   11.70
  -5   3 -12   60.69    7.00
   5   3  12   63.29   11.00
  -5  -3  12   81.29   13.90
   5   3  12   63.09   10.30
  -5   3 -12   61.49   12.70
  -5   3 -12   60.59    9.30
  -6  -3 -12   32.80   10.40
  -6  -3 -12   23.30    9.30
  -6   3  12   16.70    7.30
  -6   3 -12   25.20   10.00
  -6  -3  12   36.40   10.00
   6   3  12   13.40    7.20
   6  -3 -12   20.20    7.40
   6   3  12   19.80    7.60
  -6   3 -12   19.80    4.80
  -6  -3  12   26.60   10.90
  -7  -3 -12   81.89   15.00
  -7  -3 -12   59.59   12.40
  -7   3  12   44.90    9.60
  -7  -3  12   53.89   12.90
  -7  -3  12   75.89   13.60
  -7   3 -12   70.49   14.30
   0   4 -12   27.00    8.30
   0   4 -12   45.70    4.60
   0   4  12   41.20    8.20
   0   4 -12   38.50    8.10
   0  -4  12   25.80    5.70
   0   4  12   37.10    8.40
   0  -4 -12   33.50    3.90
   0  -4 -12   33.50    8.00
  -1  -4 -12  540.55   25.30
   1  -4  12  638.24   28.00
  -1  -4 -12  566.54   19.80
   1   4 -12  540.15   18.80
  -1   4  12  559.34   24.80
  -1  -4 -12  534.15   24.70
   1   4 -12  582.64   27.20
  -1   4  12  531.05   24.20
   1  -4 -12  583.34   25.70
   1   4  12  590.44   25.80
  -1   4 -12  585.04   17.40
  -1  -4  12  546.95   22.70
   1   4  12  605.04   25.60
  -1   4 -12  569.64   27.30
  -2  -4 -12  148.99   13.90
   2   4 -12  154.38   13.60
  -2  -4 -12  127.19   10.30
  -2   4  12  152.28   12.40
  -2  -4 -12  142.79   13.50
  -2   4  12  144.79   13.60
  -2  -4  12  143.89   12.60
   2  -4 -12  128.19   12.90
  -2   4 -12  147.69   14.10
   2   4  12  127.79   12.00
  -2   4 -12  147.59    7.50
   2   4  12  126.29   13.90
   3   4 -12  314.27   18.70
  -3  -4 -12  275.97   16.10
  -3  -4 -12  282.47   18.50
  -3  -4 -12  270.57   17.00
  -3   4  12  238.88   17.40
  -3   4  12  271.67   17.00
   3   4  12  288.27   17.40
  -3   4 -12  233.88   17.70
   3   4  12  277.87   18.60
   3  -4 -12  281.47   17.90
  -3   4 -12  280.77   13.40
  -3  -4  12  306.87   18.20
  -4   4  12   17.80    6.20
  -4  -4 -12   11.80    8.30
  -4  -4 -12   24.50    6.90
  -4   4  12   -2.20    6.00
   4   4 -12    6.80    5.70
  -4  -4 -12   14.30    6.80
  -4   4 -12    6.20    7.90
   4  -4 -12   24.40    8.50
  -4   4 -12   15.50    7.00
  -4  -4  12    3.70    6.60
   4   4  12   13.70    8.20
  -4   4 -12   18.30    3.80
   4   4  12   -3.40    5.60
   5   4 -12  127.79   12.70
  -5  -4 -12  154.98   15.50
  -5   4  12  130.89   12.70
  -5   4  12  134.99   14.60
  -5  -4 -12  129.89   14.90
  -5  -4 -12  109.89   11.40
   5  -4 -12  133.79   13.30
   5   4  12  113.39   14.20
  -5   4 -12  138.39   13.10
  -5   4 -12  124.69   15.50
  -5  -4  12  139.89   14.50
   5   4  12  136.39   14.70
  -6   4  12   24.40    8.70
  -6  -4 -12   -8.20    6.70
  -6   4  12    6.80    6.30
  -6  -4 -12   11.80    7.80
   6   4  12   12.50    8.30
   6  -4 -12    0.30    6.70
  -6  -4  12   24.10    8.90
   6   4  12   24.70    9.40
  -6   4 -12   13.70    8.80
  -6  -4  12    2.90    8.80
  -7   4  12   43.30    9.60
  -7  -4 -12   24.90    9.60
   7   4  12   54.09   12.00
   0   5 -12  190.18   10.10
   0   5 -12  184.78   17.00
   0   5  12  169.88   14.40
   0  -5 -12  214.98   16.00
   0  -5 -12  180.78   15.40
   0   5  12  178.58   14.20
  -1   5  12   99.29   12.10
  -1   5  12  114.69   12.50
   1   5 -12  111.19    8.70
  -1  -5 -12  136.19   13.60
   1   5 -12  123.79   14.70
  -1  -5 -12  109.59   12.80
   1   5  12  155.78   14.00
   1   5  12  123.29   12.80
   1  -5 -12  130.59   14.20
  -1   5 -12  150.68   14.90
   2   5 -12  202.88   17.40
  -2  -5 -12  204.28   15.80
  -2  -5 -12  242.98   17.80
  -2  -5 -12  208.38   13.80
  -2   5  12  207.28   16.60
  -2   5  12  223.28   15.60
   2   5 -12  210.58   12.30
   2   5  12  212.28   16.60
   2  -5 -12  208.48   16.30
  -2   5 -12  211.08   17.10
  -2  -5  12  207.28   14.40
   2   5  12  189.78   15.50
  -3   5  12   28.00    7.60
   3   5 -12   19.60    7.70
  -3  -5 -12   16.70    7.70
  -3  -5 -12   20.30    6.40
  -3  -5 -12   15.50    8.00
  -3   5  12    6.00    7.90
   3  -5 -12   15.20    8.60
  -3  -5  12   18.50    6.90
   3   5  12    3.20    7.80
  -3   5 -12   16.40    8.20
   3   5  12    6.40    7.30
  -4  -5 -12  120.79   13.00
  -4   5  12  100.19   13.20
  -4   5  12  111.19   12.50
  -4  -5 -12  111.19   15.60
   4   5 -12   88.59   12.60
  -4  -5 -12  101.99   11.60
   4   5  12  123.29   13.70
   4  -5 -12  130.29   14.60
   4   5  12  122.89   14.20
  -4  -5  12  102.59   12.50
  -4   5 -12  109.99   13.90
  -5  -5 -12  119.69   14.00
   5   5 -12  109.19   13.30
  -5  -5 -12  114.19   14.90
  -5   5  12  100.69   12.30
  -5  -5 -12  122.49   12.80
  -5   5  12  113.09   15.20
   5   5  12   97.79   14.30
   5   5  12   99.79   13.60
  -5  -5  12  122.49   14.50
  -5   5 -12  127.79   15.80
  -5   5 -12  107.49   13.10
   5  -5 -12  137.19   14.20
  -6   5  12  127.79   13.20
  -6  -5 -12   66.59   13.30
  -6  -5 -12  110.79   15.10
   6   5  12  104.59   14.60
   6  -5 -12  117.69   14.20
  -6   5 -12  114.19   16.30
  -6  -5  12   89.19   15.40
   6   5  12  117.49   15.50
   0  -6 -12   89.79   13.10
   0  -6 -12   61.99   10.20
   0   6 -12   55.19   11.80
   0   6  12   61.89   11.30
   0   6  12   80.89   12.90
   1   6 -12  307.97   22.10
  -1  -6 -12  331.87   20.60
  -1  -6 -12  331.27   21.10
  -1   6  12  345.47   20.20
  -1   6  12  354.16   21.30
   1  -6 -12  313.87   20.50
  -1   6 -12  316.87   21.80
   1   6  12  306.57   19.90
   1   6  12  347.87   21.90
  -2  -6 -12   26.70    9.30
  -2   6  12    9.30    8.20
  -2  -6 -12   20.40    8.20
   2   6 -12   20.60    9.20
  -2   6  12   19.90    7.70
   2  -6 -12   10.10    7.90
   2   6  12   21.90    8.50
   2   6  12   32.60    9.70
  -2   6 -12   21.40    9.60
  -3   6  12  179.28   14.30
   3   6 -12  162.98   16.90
  -3  -6 -12  164.58   15.20
  -3  -6 -12  142.39   15.70
  -3   6  12  179.28   17.40
   3   6 -12  151.58   13.80
   3   6  12  146.99   15.80
   3  -6 -12  206.68   17.90
   3   6  12  179.18   16.10
  -3   6 -12  164.58   16.70
   4   6 -12    3.20    7.20
  -4  -6 -12    6.50    7.90
  -4   6  12   12.10    6.90
  -4   6  12   -2.90    6.90
  -4  -6 -12   12.50    8.20
   4   6  12    4.00    7.60
  -4   6 -12   15.20    8.70
   4  -6 -12   -8.30    7.20
   4   6  12   -1.60    7.00
  -5  -6 -12   61.89   12.60
  -5  -6 -12   53.99   10.40
   5   6 -12   75.59   11.80
  -5   6  12   73.29   10.40
  -5   6 -12   38.10   10.40
   5   6  12   59.49   12.10
   5   6  12   68.69   12.90
  -5   6 -12   82.09   13.70
  -5  -6  12   58.99   13.70
   5  -6 -12   70.49   12.00
   0   7  12   51.99   11.30
   0  -7 -12   51.49   11.00
   0   7 -12   32.30   11.70
   0   7  12   43.10   10.20
  -1   7  12  129.89   15.20
  -1   7  12  135.79   14.70
  -1  -7 -12  136.59   15.70
   1   7 -12  143.89   16.50
   1   7  12  173.48   16.60
   1   7  12  140.19   15.50
  -1   7 -12  113.69   15.90
   1  -7 -12  129.59   15.90
  -2   7  12   29.70   10.80
  -2   7  12   18.20    8.20
  -2  -7 -12   48.90   10.90
   2   7 -12   29.80   10.00
  -2  -7 -12   36.10   10.50
   2   7  12   38.00   10.30
  -2   7 -12   55.39   13.20
   2  -7 -12   38.00   10.70
   2   7  12   34.90   10.10
  -3  -7 -12   37.00   11.10
  -3  -7 -12   29.10   10.40
  -3   7  12   22.10    8.50
   3   7 -12   25.00   10.10
  -3   7  12   22.60    9.40
   3   7  12   23.90    9.60
   3   7  12   17.40    8.60
   3  -7 -12   28.50   10.20
  -3   7 -12   17.00   10.00
   4   7 -12   21.50    9.50
  -4  -7 -12   32.80   10.60
  -4   7  12   -0.60    6.60
  -4  -7 -12   46.90   11.30
   4  -7 -12   11.90    8.70
  -4   7 -12   13.90    8.70
   0   0 -13    9.60    5.40
   0   0  13    5.10    4.50
   0   0  13    6.60    2.40
   1   0 -13  991.50   36.00
   1   0  13 1052.99   28.10
  -1   0  13 1040.50   35.30
   1   0  13 1019.40   34.40
  -1   0 -13 1032.30   36.40
  -1   0  13 1048.90   30.00
  -2   0 -13   -1.60    5.20
   2   0 -13    2.00    5.50
   2   0  13   -2.70    3.80
   2   0  13    0.50    2.60
  -2   0  13   -0.50    4.60
  -2   0 -13    7.50    5.70
  -2   0 -13    4.80    2.50
  -3   0 -13  946.01   35.60
  -3   0 -13  894.81   32.90
  -3   0  13  958.90   34.40
   3   0 -13  930.01   33.80
   3   0  13  924.01   32.00
  -3   0 -13  924.51   28.30
   4   0 -13  220.68   14.50
  -4   0 -13  238.98   15.40
   4   0  13  234.28   14.30
  -4   0  13  286.17   17.50
  -4   0 -13  250.17   15.00
  -4   0 -13  228.78   17.20
  -5   0  13  109.69   12.40
   5   0 -13  107.49   11.50
  -5   0 -13   95.49   13.20
  -5   0 -13  122.59   12.20
  -5   0  13   77.39   10.90
  -5   0 -13  106.89   10.20
  -6   0 -13   76.99   11.20
  -6   0  13   91.39   12.60
  -6   0 -13   69.29   13.10
  -6   0  13   80.79   12.40
  -7   0 -13   64.29   13.30
  -7   0  13   91.89   13.30
  -7   0 -13   97.59   12.20
  -7   0  13   75.39   12.60
   0  -1 -13   90.29   10.50
   0   1  13  100.49    7.50
   0  -1  13   85.09    8.90
   0   1  13   99.99   10.10
   0   1 -13  124.59   12.50
   1   1 -13  112.59   11.30
  -1  -1 -13  120.59   11.30
  -1   1  13   92.69   10.10
  -1   1  13  109.29    8.30
   1  -1  13  103.19    9.70
  -1  -1 -13  111.29   10.10
  -1  -1 -13  129.59    7.70
  -1   1 -13  110.09   11.30
  -1  -1  13  118.89    6.00
  -1  -1  13  112.79    5.90
   1   1  13  116.79   10.50
   1  -1 -13  113.89   11.30
  -1   1 -13  122.89    9.50
  -1  -1  13  106.09   10.10
   1   1  13  114.59    7.70
   2  -1  13  452.25   18.60
   2   1 -13  405.16   20.90
  -2   1  13  436.66   18.20
  -2  -1 -13  442.16   20.70
  -2   1  13  450.55   20.80
  -2  -1 -13  471.55   21.50
  -2  -1 -13  471.45   17.00
  -2  -1  13  469.65   21.00
   2  -1 -13  433.46   21.00
  -2  -1  13  445.06   16.30
  -2   1 -13  439.26   21.40
   2   1  13  433.96   20.30
   2   1  13  425.16   16.70
  -2   1 -13  450.85   12.60
  -2   1 -13  447.56   18.80
   3   1 -13  338.47   18.50
   3  -1  13  315.27   15.50
  -3  -1 -13  330.77   17.50
  -3  -1 -13  342.27   18.40
  -3   1  13  312.37   18.40
  -3  -1 -13  339.67   19.10
  -3   1 -13  357.76   16.10
   3   1  13  343.37   17.60
  -3   1 -13  324.57   19.80
   3   1  13  324.97   14.80
  -3  -1  13  322.37   18.00
   3  -1 -13  366.06   19.20
  -3   1 -13  316.57   12.20
  -3   1 -13  344.37   18.30
  -4  -1 -13  126.89   12.80
  -4   1  13   94.39   11.60
  -4  -1 -13   92.69   12.60
  -4  -1 -13   93.89   10.10
   4   1 -13   96.49   10.90
  -4  -1 -13   79.99    8.10
   4   1  13   87.49   10.80
   4  -1 -13   81.19   11.10
  -4   1 -13  106.89   10.70
  -4   1 -13  100.39   12.70
  -4   1 -13   88.69    9.70
  -4  -1  13   96.99   11.40
   4   1  13   84.99    9.30
  -5   1  13   60.49    9.50
  -5   1  13   75.49   10.60
  -5  -1 -13   74.89   10.90
  -5  -1 -13   72.69   12.10
   5   1 -13   65.89    9.80
  -5  -1 -13   66.39    8.70
  -5  -1  13   66.09   11.10
   5  -1 -13   74.49   10.20
  -5   1 -13   67.59    9.80
   5   1  13   67.09    9.40
  -5  -1  13   85.69   12.40
  -5   1 -13   78.69    9.70
  -5   1 -13   58.49   12.20
  -6  -1 -13  179.88   15.80
  -6  -1 -13  190.28   17.50
  -6   1  13  199.48   15.10
  -6   1  13  205.98   16.60
  -6  -1  13  171.68   15.60
  -6   1 -13  181.48   17.80
  -6   1 -13  166.48   13.20
  -6  -1  13  202.58   17.60
   6  -1 -13  206.78   14.80
  -7  -1 -13  106.39   15.30
  -7  -1 -13   96.49   13.50
  -7   1  13   85.89   12.30
  -7  -1  13   83.69   14.30
  -7   1 -13   79.79   14.70
  -7   1 -13  111.59   11.20
  -7  -1  13   99.39   14.50
   0  -2 -13   15.80    4.50
   0   2  13   15.70    4.90
   0   2 -13   11.10    6.00
   0  -2  13   16.70    5.50
   0   2  13   11.40    5.80
   0  -2 -13   18.00    6.70
   1  -2  13  110.49    9.30
  -1  -2 -13  105.59   11.10
  -1   2  13  130.89   11.20
  -1  -2 -13   95.69    9.10
   1   2 -13  133.89   12.90
  -1   2  13  101.79    9.10
  -1   2 -13   91.69   11.80
  -1   2 -13  111.99    9.20
  -1  -2  13   95.19    5.00
   1  -2 -13  109.79   11.50
   1  -2 -13  103.89    7.40
   1   2  13  112.79    8.80
  -1  -2  13   89.59    9.40
   1   2  13   87.29   10.30
  -2   2  13  516.55   22.80
  -2  -2 -13  498.85   21.50
   2  -2  13  476.15   19.30
   2   2 -13  489.05   23.00
  -2  -2 -13  563.74   24.00
  -2   2  13  518.55   21.30
   2  -2 -13  480.65   17.30
  -2  -2  13  510.55   17.50
   2   2  13  493.65   19.80
  -2   2 -13  459.25   22.70
   2   2  13  546.55   23.40
   2  -2 -13  539.75   24.60
  -2  -2  13  497.95   22.40
  -2   2 -13  510.65   19.80
  -3   2  13    9.50    5.40
   3  -2  13    4.40    3.90
   3   2 -13   13.80    6.60
  -3  -2 -13    5.20    6.80
  -3  -2 -13    1.00    4.30
  -3   2  13    6.10    5.50
  -3  -2 -13    4.50    4.80
  -3  -2 -13    4.40    6.00
   3   2  13   11.90    6.60
  -3   2 -13    9.80    6.30
  -3  -2  13    8.20    5.70
   3  -2 -13   12.30    6.70
   3   2  13   -1.50    4.80
   4   2 -13   90.49   10.90
  -4  -2 -13  116.29   11.00
  -4  -2 -13  157.78   14.40
  -4  -2 -13  130.29    9.90
  -4  -2 -13  133.99   13.00
  -4   2  13  125.49   12.90
  -4   2 -13  100.99   13.20
   4   2  13  125.69   13.20
   4  -2 -13  124.59   12.10
  -4   2 -13  100.89    9.60
  -4   2 -13  121.49   11.70
   4   2  13  122.39   11.50
  -4  -2  13   89.49   12.60
  -5  -2 -13  242.58   18.50
  -5  -2 -13  228.88   17.20
  -5   2  13  214.38   15.90
   5   2 -13  256.67   15.70
   5   2  13  273.67   17.30
  -5   2 -13  276.47   16.30
  -5   2 -13  250.97   20.10
  -5   2 -13  234.98   13.60
   5   2  13  237.28   15.90
  -5  -2  13  240.58   17.70
  -6  -2 -13  112.19   13.70
  -6   2  13  129.69   13.80
  -6  -2 -13  104.89   15.00
  -6   2 -13   99.69   15.00
  -6   2 -13  111.79   10.40
  -6  -2  13  102.79   15.30
  -6  -2  13  123.39   14.10
  -7  -2 -13   49.90   12.10
  -7   2  13   44.90    9.50
  -7  -2 -13   36.60    9.80
  -7   2 -13   66.89   14.00
  -7  -2  13   57.09   12.10
  -7  -2  13   61.49   13.30
  -7   2 -13   51.49    8.00
   0  -3 -13  184.78   13.90
   0   3 -13  181.98   15.10
   0   3  13  195.28   12.90
   0  -3 -13  166.68    9.10
   0   3  13  200.38   14.10
   0   3 -13  177.28   12.00
   0  -3 -13  183.48   14.60
   0  -3  13  174.68   11.70
  -1  -3 -13  801.02   31.30
  -1  -3 -13  711.63   28.60
   1   3 -13  779.02   31.10
   1  -3  13  745.83   25.90
  -1   3  13  741.93   28.20
  -1  -3 -13  742.13   25.10
  -1   3  13  755.82   29.30
   1  -3 -13  708.43   30.50
   1  -3 -13  733.23   21.30
   1   3  13  761.32   29.90
   1   3  13  738.93   27.80
  -1  -3  13  743.23   28.00
  -1   3 -13  720.73   30.30
  -1   3 -13  742.43   26.10
  -2  -3 -13  209.18   12.80
  -2   3  13  202.58   13.60
  -2  -3 -13  194.68   15.20
  -2   3  13  229.98   15.30
   2   3 -13  181.98   14.40
  -2  -3 -13  219.48   14.10
   2  -3  13  185.88   12.20
  -2  -3 -13  177.28   14.60
   2   3  13  183.48   14.40
  -2  -3  13  201.88   14.40
   2  -3 -13  170.58   14.70
   2   3  13  192.18   13.20
  -2   3 -13  177.58   14.50
   3   3 -13   68.39   10.10
  -3  -3 -13   73.39    9.10
  -3  -3 -13   94.59   10.70
  -3  -3 -13   79.79   11.50
  -3   3  13   91.19   11.20
  -3   3  13   67.39    9.80
   3   3  13  120.79   12.40
  -3  -3  13   93.79   11.80
  -3   3 -13   75.39   10.70
   3   3  13   87.89    9.70
  -4  -3 -13   36.40    9.50
   4   3 -13   35.30    8.20
  -4  -3 -13   35.40    7.40
  -4   3  13   39.50    8.80
  -4  -3 -13   26.70    7.60
  -4   3  13   33.60    7.70
   4   3  13   39.40    9.00
  -4   3 -13   18.40    8.60
   4   3  13   32.40    8.50
  -4   3 -13   41.40    6.30
  -4  -3  13   31.00    8.50
  -4   3 -13   54.99    9.90
  -5  -3 -13  118.49   10.90
   5   3 -13  116.29   12.00
  -5  -3 -13  157.58   15.70
  -5   3  13  129.99   13.30
  -5  -3 -13  158.18   15.20
  -5   3 -13  133.39   15.50
  -5   3 -13  124.99   12.10
   5   3  13  123.59   13.20
   5   3  13  134.99   13.80
  -5   3 -13  127.19    9.10
  -5  -3  13  129.79   15.30
  -6   3  13   21.80    8.20
  -6  -3 -13   20.30    8.50
  -6  -3 -13   49.70   11.30
  -6   3 -13   48.50   12.50
  -6  -3  13   22.90   10.00
   6   3  13   36.90    9.90
   6   3  13   41.80   10.90
  -6   3 -13   23.10    5.10
  -6  -3  13   33.20    9.60
  -7   3  13   51.39   10.00
  -7  -3 -13   54.69   12.30
  -7  -3  13   60.29   13.70
  -7  -3  13   44.90   11.40
   0   4  13  432.76   21.80
   0   4  13  442.46   21.20
   0   4 -13  431.66   23.10
   0  -4  13  417.06   18.50
   0  -4 -13  417.16   21.80
   0   4 -13  417.36   13.90
   1   4 -13  268.77   18.70
  -1   4  13  264.57   16.90
  -1   4  13  267.47   16.60
  -1  -4 -13  278.27   18.20
  -1  -4 -13  243.68   12.10
  -1  -4 -13  253.07   16.80
  -1   4 -13  258.37   18.90
  -1  -4  13  266.47   15.20
   1  -4 -13  279.77   17.40
   1   4  13  265.27   16.80
   1   4  13  234.98   16.40
  -2  -4 -13  456.35   19.10
   2   4 -13  450.45   23.30
  -2   4  13  420.36   22.10
  -2  -4 -13  459.65   23.40
  -2  -4 -13  454.15   22.40
  -2   4  13  446.56   22.10
   2  -4 -13  429.66   23.20
  -2   4 -13  427.56   23.30
   2   4  13  414.26   21.00
  -2  -4  13  409.36   21.10
   2   4  13  434.76   22.70
  -3   4  13   23.40    8.20
   3   4 -13   26.80    8.20
  -3  -4 -13   28.90    7.30
  -3  -4 -13   31.10    8.90
  -3   4  13   24.30    7.10
  -3  -4 -13   27.60    7.80
  -3  -4  13   30.20    8.30
   3   4  13   20.40    8.10
  -3   4 -13   36.60    9.10
   3  -4 -13   19.80    7.60
   3   4  13   21.30    8.00
  -4  -4 -13  140.19   13.50
  -4   4  13  135.69   14.20
  -4  -4 -13  100.59   11.30
  -4  -4 -13  126.69   15.50
   4   4 -13  124.99   13.30
  -4   4  13  129.49   12.90
  -4  -4  13  126.29   14.20
  -4   4 -13  142.29   15.40
   4   4  13  113.89   13.50
  -4   4 -13  118.39    8.00
  -4   4 -13  136.89   14.00
   4   4  13  133.09   13.80
   4  -4 -13  127.19   13.40
  -5   4  13  144.99   13.70
  -5  -4 -13  144.99   15.00
   5   4 -13  144.79   13.40
  -5   4  13  132.29   14.80
  -5  -4 -13  112.89   11.70
  -5  -4 -13  142.79   15.90
   5   4  13  149.59   15.40
   5  -4 -13  136.69   14.60
  -5   4 -13  156.98   16.90
  -5   4 -13  168.28   14.50
  -5  -4  13  124.99   15.20
   5   4  13  135.09   14.80
  -6   4  13  153.98   16.20
  -6   4  13  140.79   13.90
  -6  -4 -13  145.79   16.40
  -6  -4 -13  143.29   16.50
   6   4  13  173.98   16.40
  -6  -4  13  128.69   15.30
   6  -4 -13  154.78   14.20
  -6   4 -13  156.78   17.20
   6   4  13  117.19   16.00
   0  -5 -13    0.90    5.70
   0   5  13   -6.80    5.20
   0   5 -13    4.30    7.70
   0  -5 -13    8.30    6.70
   0   5  13   -7.00    5.40
  -1   5  13  141.69   14.60
   1   5 -13  155.48   16.40
  -1  -5 -13  132.69   13.70
  -1   5  13  144.79   14.00
  -1  -5 -13  149.19   14.30
   1   5  13  139.29   13.70
   1  -5 -13  129.99   13.70
  -1   5 -13  136.19   14.90
   1   5  13  167.58   14.50
  -2  -5 -13    1.90    7.60
   2   5 -13   12.30    7.20
   2   5 -13    9.10    8.00
  -2   5  13   -0.20    5.80
  -2  -5 -13    0.20    6.10
  -2   5  13   10.00    6.60
   2   5  13    0.90    6.80
  -2   5 -13    2.00    6.90
  -2  -5  13   12.20    6.20
   2   5  13    4.90    6.80
   2  -5 -13    6.20    6.90
  -3   5  13  260.77   18.60
   3   5 -13  254.17   18.90
  -3  -5 -13  274.57   18.00
  -3   5  13  282.87   17.20
  -3  -5 -13  260.47   19.20
  -3  -5 -13  260.47   15.90
  -3   5 -13  269.47   19.40
   3   5  13  287.37   20.40
  -3  -5  13  259.27   18.10
   3   5  13  270.97   18.30
   3  -5 -13  291.67   19.50
  -4   5  13   73.29   10.90
  -4  -5 -13  105.19   14.30
  -4  -5 -13   94.09   12.80
  -4   5  13  105.29   14.10
  -4  -5 -13   79.59   11.10
   4   5 -13   99.79   13.10
  -4  -5  13   70.59   11.50
  -4   5 -13   82.99   13.30
   4   5  13  102.99   14.60
   4   5  13   99.69   13.90
   4  -5 -13   72.79   11.80
  -5  -5 -13   30.70    9.50
   5   5 -13   40.60    9.50
  -5   5  13   40.30   10.60
  -5  -5 -13   39.10    9.20
  -5  -5 -13   12.50    8.60
  -5   5  13   44.00    8.80
  -5   5 -13   52.89   11.70
   5   5  13   43.50   10.70
   5  -5 -13   33.20   10.00
  -5  -5  13   34.30   10.80
   5   5  13   42.30    9.90
  -5   5 -13   64.59   11.20
  -6  -5 -13   17.30    8.30
  -6   5  13    7.20    6.90
   6  -5 -13   12.50    7.90
   6   5  13    2.00    7.60
   6   5  13    5.60    7.70
  -6  -5  13   15.80    8.70
   0   6  13  130.59   15.30
   0   6  13  175.68   15.00
   0   6 -13  159.98   17.50
   0  -6 -13  148.09   15.60
   0  -6 -13  147.29   15.00
  -1   6  13   14.20    7.10
  -1   6  13    6.00    7.00
   1   6 -13   22.00    9.90
  -1  -6 -13   14.70    8.40
  -1  -6 -13   25.80    8.90
   1  -6 -13   27.80    9.70
   1   6  13   16.40    8.60
  -1   6 -13   18.60    9.30
   1   6  13   36.30   10.30
   2   6 -13   39.60   10.40
  -2   6  13   64.79   11.60
  -2  -6 -13   67.09   11.90
  -2   6  13   63.99   10.90
  -2  -6 -13   35.50   10.50
   2  -6 -13   37.30   10.70
   2   6  13   46.70   11.50
   2   6  13   79.19   13.10
  -2   6 -13   56.59   12.50
   3   6 -13   13.80    7.80
  -3   6  13    8.00    6.30
  -3  -6 -13   -2.00    8.10
  -3   6  13   -0.80    7.40
  -3  -6 -13    8.60    8.30
   3   6  13   -3.30    7.30
  -3   6 -13    5.30    7.80
   3   6  13   20.20    8.80
   3  -6 -13    1.20    7.00
   4   6 -13   63.29   12.10
  -4  -6 -13   90.59   12.40
  -4  -6 -13  103.39   14.70
  -4   6  13  112.29   14.50
  -4   6  13   77.79   11.50
   4   6  13   61.79   12.10
  -4   6 -13   64.49   12.50
   4   6  13   76.89   13.50
   4  -6 -13  114.39   14.30
  -5  -6 -13   11.70    9.70
  -5   6  13   13.30    7.00
  -5  -6 -13    6.30    7.80
   5   6 -13    5.80    7.60
  -5   6 -13    6.40    9.10
  -5   6 -13   14.30    8.30
   5  -6 -13   18.90    8.50
   5   6  13   11.80    9.50
   5   6  13   11.30    8.70
   0   7  13  354.16   22.20
   0   7 -13  291.07   22.40
   0  -7 -13  326.17   22.30
   0   7  13  333.07   22.20
  -1  -7 -13   92.79   15.20
  -1   7  13   96.99   13.60
  -1   7  13   68.39   12.70
   1   7 -13   68.39   13.90
   1  -7 -13  111.09   15.00
   1   7  13  119.49   14.50
  -1   7 -13  131.89   17.80
   1   7  13  114.49   15.60
  -2   7  13   65.69   13.40
  -2  -7 -13   69.99   12.90
   2   7 -13   53.59   12.60
  -2  -7 -13   47.60   11.50
  -2   7  13   62.09   10.70
  -2   7 -13   64.09   12.70
   2   7  13   53.99   12.50
   2  -7 -13   49.60   12.50
   2   7  13   61.89   11.90
   3   7 -13   58.29   12.20
  -3  -7 -13   40.00   11.80
  -3  -7 -13   38.90   11.10
  -3   7  13   59.99   10.60
   3  -7 -13   74.89   13.50
  -3   7 -13   48.30   12.70
   3   7  13   40.20   11.80
   0   0  14  150.18    6.90
   0   0  14  142.29   11.40
   0   0 -14  173.38   13.30
   1   0  14   16.40    5.60
   1   0 -14    8.90    5.70
  -1   0  14    9.90    3.30
  -1   0  14    5.30    5.00
  -1   0 -14   11.70    6.00
   1   0  14   10.80    2.60
  -2   0 -14  290.27   17.10
  -2   0 -14  293.87   17.10
  -2   0 -14  287.67   11.00
   2   0  14  307.37   16.50
   2   0  14  294.07   11.20
  -2   0  14  286.57   17.20
   2   0 -14  290.27   17.70
  -3   0 -14   45.40    9.50
  -3   0 -14   48.00    6.40
  -3   0 -14   67.19   10.10
  -3   0  14   49.60    8.80
   3   0  14   40.80    7.40
   3   0 -14   53.79    8.80
  -4   0 -14  164.18   12.80
   4   0  14  134.39   11.70
   4   0 -14  165.08   13.50
  -4   0 -14  151.98   13.20
  -4   0 -14  147.79   14.30
  -4   0  14  128.29   13.70
  -5   0 -14   88.49   13.00
  -5   0  14   80.59   11.40
  -5   0 -14   96.89   10.40
  -5   0 -14   81.69   11.20
   5   0 -14   69.09   10.30
  -6   0 -14  154.08   16.80
  -6   0  14  147.89   15.10
  -6   0  14  133.19   14.20
  -6   0 -14  131.29   13.60
  -7   0 -14    0.70    6.60
  -7   0  14    8.80    8.10
  -7   0 -14   20.20   10.40
  -7   0  14    4.30    7.20
   0   1  14  258.77   11.50
   0  -1  14  256.87   14.50
   0   1 -14  232.78   15.80
   0   1  14  258.57   15.40
   0  -1 -14  232.68   15.60
  -1  -1 -14  433.56   19.60
  -1   1  14  438.26   17.00
   1   1 -14  418.36   21.10
  -1   1  14  449.76   21.10
  -1  -1 -14  420.86   21.00
  -1  -1 -14  427.96   15.80
   1  -1  14  425.76   18.90
  -1  -1  14  432.46   13.60
  -1  -1  14  412.66   19.80
  -1  -1  14  450.85   13.70
   1  -1 -14  378.16   20.70
   1   1  14  447.36   20.50
   1   1  14  427.36   15.80
  -1   1 -14  433.46   21.80
   2   1 -14  211.68   15.70
   2  -1  14  214.88   13.00
  -2  -1 -14  204.28   14.10
  -2  -1 -14  220.58   10.90
  -2   1  14  224.98   12.50
  -2  -1 -14  216.98   15.40
  -2   1  14  222.88   14.70
  -2   1 -14  238.48   15.60
  -2   1 -14  219.98   13.00
   2  -1 -14  201.58   14.80
  -2  -1  14  212.18   10.50
   2   1  14  218.88   11.10
   2   1  14  223.08   14.70
  -2  -1  14  209.88   14.30
  -3  -1 -14  312.77   17.90
   3  -1  14  333.07   16.40
  -3   1  14  385.06   19.50
  -3  -1 -14  322.47   19.10
   3   1 -14  358.56   19.30
  -3  -1 -14  330.37   18.10
  -3  -1  14  290.57   17.80
   3   1  14  312.37   17.40
   3   1  14  333.67   14.90
  -3   1 -14  303.77   17.90
  -3   1 -14  282.57   18.80
   3  -1 -14  318.97   18.40
   4   1 -14   41.10    8.60
  -4  -1 -14   55.29   10.10
  -4   1  14   62.19   10.00
  -4  -1 -14   43.90    9.70
  -4  -1 -14   43.30    8.30
  -4  -1 -14   46.70    7.00
   4  -1 -14   46.50    9.20
   4   1  14   41.20    8.70
  -4   1 -14   28.90    9.00
   4   1  14   45.30    7.30
  -4   1 -14   47.90    8.30
  -4  -1  14   38.30    8.60
  -4   1 -14   45.50    8.80
  -5  -1 -14   17.80    7.90
  -5  -1 -14   28.50    6.80
  -5  -1 -14   36.30    9.90
  -5   1  14    4.50    5.90
   5   1 -14    9.60    5.80
  -5   1 -14   17.30    6.20
  -5  -1  14   16.50    7.20
  -5   1 -14   24.70    6.70
  -5   1 -14   10.00    7.80
   5  -1 -14   14.10    6.90
  -6  -1 -14   -3.90    6.20
  -6   1  14    1.90    6.50
  -6   1  14   -2.10    6.00
  -6  -1 -14   -8.10    6.40
  -6  -1  14    4.20    6.80
  -6   1 -14    3.70    7.70
  -6   1 -14    3.50    5.50
  -6  -1  14    2.50    7.40
   6  -1 -14   -2.20    5.40
  -7  -1 -14  136.29   17.90
  -7  -1 -14  131.79   15.50
  -7   1  14  145.89   15.20
  -7   1 -14  148.39   17.60
  -7   1 -14  144.99   12.70
  -7  -1  14  150.48   16.60
  -7  -1  14  180.38   17.50
   0   2  14   10.70    4.90
   0   2 -14   17.80    7.40
   0  -2 -14    9.50    6.10
   0   2  14   17.00    6.20
   0  -2  14   13.50    5.50
   0  -2 -14   19.10    4.90
  -1  -2 -14   11.20    6.30
   1  -2  14    0.20    3.50
  -1  -2 -14    9.00    4.80
  -1   2  14    3.40    5.10
   1   2 -14   10.40    6.80
  -1   2  14    0.00    4.10
   1   2  14    3.30    4.20
  -1  -2  14    2.90    5.20
  -1   2 -14   -3.30    5.20
  -1   2 -14    6.50    4.80
   1   2  14    7.40    6.40
   1  -2 -14   13.10    6.30
   1  -2 -14    8.40    3.70
  -1  -2  14    6.10    1.90
  -2   2  14   16.20    5.70
  -2  -2 -14   14.50    6.00
   2  -2  14    8.10    4.60
  -2  -2 -14   15.50    6.00
   2   2 -14   25.30    7.60
  -2   2  14   19.60    6.50
  -2   2 -14   17.10    5.00
  -2   2 -14    2.60    6.90
   2   2  14    6.10    5.60
  -2  -2  14    1.90    5.10
   2  -2 -14    5.20    6.10
   2   2  14    0.70    4.10
  -3   2  14  103.79   11.10
  -3  -2 -14  109.19   11.20
  -3   2  14  103.69   11.30
  -3  -2 -14   99.89   11.90
  -3  -2 -14  117.19   10.60
  -3  -2 -14  115.49   11.30
   3   2 -14  104.59   11.60
   3   2  14  108.99   11.70
  -3   2 -14  109.79   12.60
   3  -2 -14  103.49   12.60
  -3  -2  14  109.79   11.60
   3   2  14   92.59    9.80
   4   2 -14   89.09   11.60
  -4  -2 -14  116.99   12.60
  -4  -2 -14  118.39   10.30
  -4   2  14   89.69   11.20
  -4  -2 -14  103.89   11.20
  -4  -2 -14  103.19   12.20
  -4   2 -14   93.99   11.60
  -4   2 -14  101.99    9.50
  -4   2 -14  122.79   13.70
   4   2  14   97.69   12.80
   4  -2 -14  101.99   12.70
   4   2  14  111.29   10.70
  -4  -2  14   97.69   12.00
  -5  -2 -14    5.80    8.10
  -5   2  14    8.20    6.90
  -5  -2 -14    7.80    5.60
  -5  -2 -14    8.60    7.00
   5   2 -14    7.80    6.30
  -5   2 -14    9.10    5.00
  -5  -2  14   14.70    8.40
   5   2  14    5.10    6.10
  -5   2 -14   19.70    6.60
  -5   2 -14   14.50    8.00
   5   2  14   -8.80    5.00
  -6  -2 -14   21.50    8.80
  -6   2  14   28.20    8.50
  -6  -2 -14   33.60    9.70
  -6  -2  14   34.00    9.80
  -6   2 -14   38.80    7.40
  -6   2 -14    6.50    8.70
  -7   2  14  140.89   22.90
  -7  -2 -14  112.59   16.00
  -7  -2  14  110.59   16.60
  -7   2 -14  127.19   11.50
  -7  -2  14  114.69   14.80
   0  -3  14  878.81   30.40
   0   3  14  848.22   30.40
   0   3 -14  844.52   34.10
   0  -3 -14  833.02   26.20
   0   3  14  902.61   33.30
   0  -3 -14  805.92   33.50
   1   3 -14   68.99   11.00
  -1  -3 -14   54.39    7.50
  -1  -3 -14   53.09    9.70
   1  -3  14   60.69    7.80
  -1   3  14   63.19    9.20
  -1   3  14   54.99    9.30
  -1  -3 -14   60.89   10.10
   1   3  14   46.10    9.30
   1  -3 -14   58.59    5.20
  -1  -3  14   61.39    9.20
   1  -3 -14   53.19   10.40
   1   3  14   55.49    8.80
  -1   3 -14   46.50   10.20
  -2  -3 -14  134.69   11.20
  -2  -3 -14  139.59   12.10
   2   3 -14  117.19   13.60
  -2   3  14  135.89   12.10
  -2   3  14  133.59   12.30
  -2  -3 -14  167.98   14.20
  -2  -3 -14  118.09   12.50
  -2  -3  14  138.19   12.50
   2   3  14  132.29   11.40
   2   3  14  132.29   12.90
   2  -3 -14  130.39   13.60
  -2   3 -14  151.38   14.20
  -3  -3 -14   69.09   11.20
  -3  -3 -14   96.09   11.30
   3   3 -14  125.79   13.40
  -3  -3 -14  112.09   11.20
  -3   3  14  115.19   12.10
  -3   3  14   95.79   11.90
  -3  -3  14  120.99   12.90
   3   3  14   73.89   10.10
  -3   3 -14  100.79   12.20
   3   3  14   74.99   11.40
   4   3 -14   19.60    7.60
  -4  -3 -14   11.70    7.30
  -4   3  14   24.80    8.00
  -4  -3 -14   18.10    6.40
  -4   3  14   23.70    8.10
  -4  -3 -14   22.20    7.90
  -4   3 -14   24.50    7.90
  -4  -3  14   14.10    7.70
  -4   3 -14   14.20    8.50
   4   3  14   13.50    6.60
   4   3  14   28.40    8.50
  -4   3 -14   21.60    5.20
   5   3 -14   10.90    6.80
  -5   3  14   37.30    9.10
  -5   3  14   40.70   10.20
  -5  -3 -14   29.90    8.90
  -5  -3 -14   13.30    8.10
   5   3  14   21.40    8.70
  -5   3 -14   28.30    9.70
  -5   3 -14   23.70    5.40
   5   3  14   14.60    7.50
  -5   3 -14   14.50    7.30
  -5  -3  14   22.00    8.90
  -6  -3 -14   46.00   11.40
  -6   3  14   19.20    8.00
  -6  -3 -14   24.90    9.80
   6   3  14   32.90    9.20
  -6   3 -14   40.80    6.50
  -6  -3  14   36.60   10.60
  -6   3 -14   54.59   12.50
  -7  -3 -14   16.10   10.20
  -7  -3  14   47.40   20.00
   0  -4 -14    2.20    6.80
   0  -4  14   -1.10    4.50
   0   4  14    4.70    5.50
   0   4  14    3.20    5.70
   0   4 -14   -2.20    6.10
  -1  -4 -14  333.37   19.70
  -1  -4 -14  299.47   18.70
  -1   4  14  315.77   18.60
   1   4 -14  332.97   20.30
  -1  -4 -14  309.47   15.00
  -1   4  14  314.67   18.50
   1  -4 -14  338.37   19.80
   1   4  14  346.47   19.10
   1   4  14  333.97   19.60
  -1   4 -14  308.27   20.70
  -1  -4  14  314.57   17.20
  -2   4  14   25.40    8.00
  -2  -4 -14   20.80    5.70
  -2  -4 -14   23.50    8.10
   2   4 -14   22.90    8.60
  -2   4  14   19.20    6.90
  -2  -4 -14   23.80    8.40
   2  -4 -14   34.00    8.90
   2   4  14   17.20    7.50
   2   4  14    9.10    6.30
  -2   4 -14   23.50    8.20
  -2  -4  14   18.40    7.10
  -3  -4 -14   79.39   10.40
  -3   4  14   50.69   10.00
  -3  -4 -14   65.99    9.30
  -3   4  14   61.99   11.10
   3   4 -14   50.69   10.50
  -3  -4 -14   62.99   11.10
   3   4  14   47.90    9.60
  -3   4 -14   55.79   11.10
   3  -4 -14   61.19   11.30
   3   4  14   57.79   10.80
  -3  -4  14   47.70    9.30
  -4   4  14   86.09   12.00
  -4  -4 -14   74.89   12.70
  -4  -4 -14   89.69   11.80
  -4   4  14   87.09   13.10
  -4  -4 -14   93.59   11.40
   4   4 -14   79.69   12.30
  -4   4 -14   69.99   13.10
   4   4  14   95.79   11.70
  -4   4 -14   78.49    7.30
  -4  -4  14   84.39   12.20
   4  -4 -14   75.19   12.30
   4   4  14   77.69   12.50
  -4   4 -14   83.69   12.80
   5   4 -14   71.19   11.20
  -5  -4 -14   55.19   11.70
  -5   4  14   93.19   13.10
  -5   4  14   61.89   11.00
  -5  -4 -14   56.69   11.20
   5   4  14   92.19   13.40
   5   4  14   58.99   11.50
  -5   4 -14   96.09   12.30
   5  -4 -14   99.39   12.40
  -5  -4  14   52.29   11.20
  -5   4 -14   80.49   14.40
  -6   4  14   65.59   13.00
  -6   4  14   50.39   10.10
  -6  -4 -14   61.89   14.40
  -6  -4 -14   63.89   12.60
   6   4  14   64.79   12.20
   6   4  14   54.29   11.70
   6  -4 -14   68.59   12.10
  -6  -4  14   58.69   11.90
  -6   4 -14   61.09   14.20
   0   5  14    6.30    6.70
   0  -5 -14    8.40    7.10
   0   5  14   -6.80    5.60
   0  -5 -14    5.10    7.10
   0   5 -14   -8.30    6.40
   1   5 -14  130.79   14.70
  -1  -5 -14  112.59   14.60
  -1   5  14  124.09   13.90
  -1   5  14  115.69   13.20
  -1  -5 -14  132.29   14.90
  -1   5 -14  132.09   15.10
   1   5  14  125.69   13.10
   1  -5 -14  126.19   13.90
   1   5  14  142.49   14.80
  -2  -5 -14  221.98   17.70
  -2   5  14  241.38   17.90
  -2  -5 -14  252.37   17.40
   2   5 -14  239.08   18.20
  -2   5  14  209.68   16.60
  -2   5 -14  264.77   19.40
   2   5  14  236.98   17.60
   2   5  14  238.78   18.00
   2  -5 -14  223.68   17.60
  -3   5  14   98.29   12.40
   3   5 -14  112.89   13.30
  -3  -5 -14   93.19   12.20
  -3   5  14   93.09   13.80
  -3  -5 -14  117.49   15.60
   3   5  14  111.69   14.10
  -3  -5  14   75.59   11.90
  -3   5 -14  109.99   15.30
   3  -5 -14   98.99   13.20
   3   5  14   97.79   13.90
  -4  -5 -14   18.90    9.30
  -4   5  14   27.60    8.10
  -4  -5 -14   33.90    8.90
  -4  -5 -14   35.20    9.40
  -4   5  14   29.00    9.30
   4   5 -14   39.30   10.20
   4   5  14   14.30    8.00
   4  -5 -14   29.60    9.90
  -4   5 -14   21.50    9.00
   4   5  14   31.30    9.90
  -4  -5  14   28.40    9.20
  -5  -5 -14   57.29   12.00
  -5   5  14   61.59   11.00
   5   5 -14   51.39   10.40
  -5  -5 -14   43.90   10.40
  -5   5  14   59.99   12.90
  -5   5 -14   50.09   10.30
   5   5  14   44.50   11.40
   5  -5 -14   32.80   10.40
   5   5  14   69.99   12.70
  -5  -5  14   50.79   11.10
  -5   5 -14   66.29   14.00
   0   6 -14   53.89   11.80
   0   6  14   47.40   11.00
   0   6  14   34.20    9.00
   0  -6 -14   33.80    9.80
   0  -6 -14   48.60   10.20
  -1   6  14  114.59   12.80
  -1  -6 -14  120.89   14.00
  -1   6  14   92.09   13.00
   1   6 -14  155.08   16.40
  -1  -6 -14  131.89   16.00
  -1   6 -14  128.79   15.90
   1   6  14  117.49   13.90
   1   6  14   95.69   13.20
   1  -6 -14  102.89   14.10
  -2  -6 -14   15.80    9.10
  -2  -6 -14    5.90    7.30
   2   6 -14    7.90    8.40
  -2   6  14    4.80    6.60
  -2   6  14    6.90    6.80
   2   6  14    7.60    8.10
  -2   6 -14   -4.40    7.30
   2   6  14    8.50    7.90
   2  -6 -14   10.90    8.00
  -3   6  14   82.29   13.20
  -3  -6 -14  100.59   15.10
  -3  -6 -14  113.59   14.50
  -3   6  14   71.59   11.20
   3   6 -14  107.39   15.60
   3   6  14  100.39   13.50
  -3   6 -14  114.49   16.30
   3  -6 -14   94.39   14.40
   3   6  14  110.79   15.60
   4   6 -14   25.00    9.10
  -4   6  14   28.90    8.30
  -4   6  14   38.10   11.50
  -4  -6 -14   32.60   10.40
  -4  -6 -14   17.00    7.70
  -4   6 -14   19.30    8.60
   4   6  14   33.40   11.00
   4   6  14   12.50    9.40
   4  -6 -14   20.00    9.70
   0   7  14   14.60    7.80
   0  -7 -14    1.30    7.60
   0   7 -14   13.30    9.20
   0   7  14   -3.40    6.60
  -1   7  14   32.20    9.80
  -1  -7 -14   33.80   10.30
   1   7 -14   36.00   11.10
  -1   7  14   21.50   10.20
  -1   7 -14   31.20   11.30
   1   7  14   41.00   11.30
   1   7  14   28.60   10.10
   1  -7 -14   41.70   11.90
  -2   7  14   24.20    8.80
  -2   7  14   14.60    9.50
   2   7 -14    8.80    7.90
  -2  -7 -14    4.70    8.10
  -2   7 -14   25.60   11.40
   2   7  14   31.60   15.70
   2  -7 -14    2.80    7.70
   2   7  14   25.70    9.50
   3   7 -14   31.60   11.00
  -3  -7 -14   28.90   10.60
  -3  -7 -14   38.30   10.40
   3  -7 -14   31.60   10.30
   0   0 -15    0.30    5.10
   0   0  15    1.10    4.80
   0   0  15    2.40    2.20
  -1   0 -15  402.66   20.80
  -1   0  15  388.46   14.40
  -1   0  15  417.66   20.50
   1   0  15  391.66   19.00
   1   0  15  392.56   12.50
   1   0 -15  385.56   20.80
   2   0  15   82.79    9.70
  -2   0  15   90.69   10.80
  -2   0 -15   78.99   11.30
  -2   0  15   76.09    7.40
  -2   0 -15   77.29    6.40
   2   0 -15   74.09   11.40
  -2   0 -15   85.49   10.70
  -3   0  15   85.99   11.00
   3   0  15  104.29   10.10
  -3   0 -15  102.89   11.10
   3   0 -15   82.29   10.60
  -3   0 -15   99.29   12.10
   4   0 -15   12.10    7.30
  -4   0  15   11.30    7.00
  -4   0 -15   18.40    8.00
  -4   0 -15    8.00    5.90
  -4   0 -15   20.10    6.60
   4   0  15   11.50    6.40
  -5   0 -15   89.89   10.40
  -5   0 -15   89.39   13.90
  -5   0 -15   85.99   11.80
   5   0 -15  102.09   11.90
  -5   0  15   92.69   12.40
  -6   0 -15  294.87   18.80
  -6   0 -15  274.77   21.50
  -6   0  15  289.17   20.10
  -7   0 -15   -2.20    6.80
  -7   0  15   -8.70    7.00
   0  -1  15    8.60    5.10
   0  -1 -15    6.40    5.90
   0   1 -15   11.80    6.00
   0   1  15    9.10    5.80
   0   1  15    1.30    3.10
   1  -1  15   19.40    5.70
  -1  -1 -15   18.60    7.40
   1   1 -15   21.70    7.20
  -1  -1 -15   18.20    4.10
  -1   1  15   17.30    4.70
  -1   1  15   21.60    6.90
  -1  -1 -15   28.20    6.80
   1   1  15   22.40    4.40
   1   1  15   17.70    6.50
   1  -1 -15   34.40    8.20
  -1  -1  15   22.60    6.90
  -1  -1  15   14.50    2.80
  -1   1 -15   18.90    6.80
   2   1 -15   21.50    7.80
  -2   1  15   27.10    5.80
   2  -1  15   28.20    6.50
  -2  -1 -15   25.20    4.70
  -2  -1 -15   27.10    7.80
  -2   1  15   19.80    6.90
  -2  -1 -15   12.90    6.50
  -2  -1  15   26.30    7.60
  -2   1 -15   30.30    8.10
   2   1  15   29.50    5.30
   2   1  15   14.20    6.30
   2  -1 -15   21.20    7.20
  -3   1  15   31.90    8.70
  -3  -1 -15   37.20    8.30
  -3  -1 -15   32.40    8.00
   3   1 -15   30.80    7.70
   3  -1  15   47.50    7.80
  -3  -1 -15   51.39   10.00
  -3   1 -15   25.70    8.90
   3   1  15   27.90    5.70
   3   1  15   29.00    7.20
  -3  -1  15   58.59    9.80
   3  -1 -15   26.80    7.90
  -3   1 -15   34.70    8.00
  -4  -1 -15   52.89    9.40
  -4  -1 -15   37.50    8.60
  -4  -1 -15   49.50    7.30
   4   1 -15   35.40    8.10
  -4  -1 -15   43.00    9.60
  -4   1  15   47.00    9.30
  -4  -1  15   29.60    8.50
  -4   1 -15   45.90    8.50
  -4   1 -15   57.09   11.80
   4  -1 -15   43.60    9.70
   4   1  15   47.10    8.60
  -4   1 -15   46.90    9.00
  -5  -1 -15  166.18   13.10
   5   1 -15  179.98   14.30
  -5  -1 -15  147.09   15.60
  -5   1  15  165.48   15.30
  -5  -1 -15  180.28   14.90
  -5   1 -15  204.98   17.90
  -5  -1  15  137.39   14.90
  -5   1 -15  166.08   13.20
   5  -1 -15  146.19   13.90
  -5   1 -15  179.38   13.70
  -6  -1 -15   20.00    8.60
  -6  -1 -15   22.30    9.80
  -6   1  15   26.00    8.20
  -6   1 -15   17.50    7.60
  -6   1 -15   43.20   12.20
   6  -1 -15   23.80    9.10
  -6  -1  15   16.30    8.40
  -7  -1 -15   18.80    9.20
  -7  -1 -15   -0.60   10.40
  -7  -1  15   15.80    9.10
  -7   1 -15   14.40    7.20
   0   2  15  299.87   18.00
   0  -2  15  339.57   17.30
   0  -2 -15  345.77   15.50
   0   2 -15  323.97   19.90
   0   2  15  322.07   15.10
   0  -2 -15  353.76   20.50
   1  -2  15  768.12   28.30
   1   2 -15  793.82   32.70
  -1  -2 -15  737.53   31.20
  -1   2  15  795.72   27.80
  -1   2  15  791.62   31.00
  -1  -2 -15  808.62   28.30
   1   2  15  753.32   30.80
   1  -2 -15  768.42   31.90
  -1   2 -15  726.03   31.50
  -1  -2  15  850.01   30.50
   1   2  15  823.22   27.20
  -2  -2 -15   28.00    7.30
   2  -2  15   16.50    5.50
  -2  -2 -15   28.60    7.70
  -2   2  15   26.90    7.40
  -2   2  15   22.60    6.20
   2   2 -15   43.30    9.10
   2   2  15   29.70    7.80
  -2  -2  15   30.60    7.40
   2   2  15   27.20    6.10
   2  -2 -15   36.90    8.80
  -2   2 -15   29.40    8.80
  -3  -2 -15  342.47   17.30
  -3   2  15  329.87   17.90
  -3  -2 -15  347.87   20.00
  -3   2  15  307.07   18.40
   3   2 -15  322.77   19.60
  -3  -2 -15  294.67   18.50
  -3  -2 -15  296.37   18.60
   3  -2 -15  342.97   19.90
   3   2  15  312.77   16.20
   3   2  15  322.47   19.20
  -3  -2  15  328.47   19.50
  -3   2 -15  315.77   19.50
  -4  -2 -15   28.80    6.60
  -4  -2 -15    9.30    7.50
  -4  -2 -15   10.10    5.80
   4   2 -15   14.10    7.00
  -4   2  15   14.10    6.10
  -4   2  15   19.50    7.20
  -4  -2 -15   11.40    7.70
  -4  -2  15    4.40    6.40
  -4   2 -15   29.50    7.50
   4   2  15   12.30    5.80
   4  -2 -15    7.50    7.10
   4   2  15   23.60    7.70
  -4   2 -15   12.20    8.40
  -4   2 -15    2.80    5.00
   5   2 -15  344.87   19.90
  -5   2  15  423.86   22.80
  -5  -2 -15  350.76   22.10
  -5  -2 -15  408.76   22.70
  -5  -2 -15  336.67   18.60
  -5   2 -15  368.86   23.90
   5  -2 -15  388.86   21.90
  -5   2 -15  363.16   19.70
   5   2  15  362.66   21.40
  -5  -2  15  389.26   22.50
   5   2  15  397.86   20.10
  -5   2 -15  369.46   18.00
  -6  -2 -15   34.20   10.10
  -6  -2 -15   28.90   10.00
  -6   2  15   29.10    9.20
  -6   2 -15   35.70   11.00
  -6  -2  15   38.00   10.10
  -6   2 -15   39.30    7.90
  -7   2 -15  159.48   12.70
   0  -3 -15   28.80    5.00
   0  -3 -15   31.50    8.90
   0   3  15   19.30    6.20
   0   3 -15   25.00    8.00
   0   3  15   16.30    7.20
   0  -3  15   36.10    7.30
  -1  -3 -15   97.99   12.30
   1   3 -15  115.79   13.70
  -1  -3 -15  102.29    9.00
  -1  -3 -15   89.79   12.10
   1  -3  15   90.49    9.30
  -1   3  15   96.59   10.50
  -1   3  15   99.59   11.60
   1  -3 -15  106.69   13.90
  -1  -3  15  117.99   10.70
  -1   3 -15   88.59   12.40
   1   3  15  110.69   10.90
   1   3  15  116.29   12.20
   2   3 -15   35.70    9.30
  -2  -3 -15   60.99   10.40
  -2  -3 -15   53.99    9.80
  -2  -3 -15   64.09    9.80
  -2   3  15   63.09   10.10
  -2  -3 -15   66.39    8.70
  -2   3  15   54.39    9.20
   2   3  15   53.09   10.00
   2   3  15   70.99    9.40
  -2  -3  15   76.29   10.90
   2  -3 -15   59.09   11.10
  -2   3 -15   65.29   11.90
   3   3 -15   85.79   11.70
  -3   3  15   69.89   10.40
  -3  -3 -15   71.99    9.70
  -3  -3 -15   70.59   11.70
  -3  -3 -15   76.69   10.70
  -3   3  15   79.69   10.40
  -3  -3 -15   79.59   10.60
  -3  -3  15   84.79   11.90
   3   3  15   79.29   11.50
   3   3  15   62.99    9.60
   3  -3 -15   84.19   12.00
  -3   3 -15   95.29   13.40
  -4  -3 -15   31.80    8.90
  -4  -3 -15   21.80    8.30
   4   3 -15   58.59   10.20
  -4  -3 -15   31.70    7.30
  -4   3  15   34.70    8.60
  -4   3  15   50.29   10.30
  -4   3 -15   47.90   11.30
   4   3  15   39.10    8.50
  -4  -3  15   36.60    9.60
   4   3  15   38.60   10.00
  -4   3 -15   45.70   10.00
  -5   3  15   68.09   12.00
  -5  -3 -15   53.09   11.10
   5   3 -15   45.40    9.40
  -5  -3 -15   65.89   12.40
  -5   3  15   71.39   11.40
  -5  -3  15   71.49   12.40
  -5   3 -15   43.40    6.90
   5   3  15   69.39   11.30
  -5   3 -15   55.89   10.00
  -5   3 -15   56.09   12.70
   5   3  15   72.49   12.90
  -6   3  15   29.50    8.50
  -6  -3 -15   25.30   10.10
  -6  -3 -15   23.50   10.10
  -6   3 -15   25.20   10.60
  -6  -3  15   30.70   10.40
   6   3  15   31.80    9.40
  -6   3 -15   14.30    5.50
   0   4  15  168.48   13.90
   0  -4 -15  156.38   14.60
   0   4 -15  186.78   16.00
   0   4  15  156.78   14.00
  -1  -4 -15   26.20    8.10
   1   4 -15   28.60    8.60
  -1  -4 -15   20.70    7.70
  -1   4  15   22.30    7.10
  -1   4  15   22.70    7.60
   1   4  15   28.50    8.20
  -1  -4  15   15.00    6.40
   1   4  15   20.50    7.30
   1  -4 -15   25.10    8.60
  -1   4 -15   32.40    9.30
  -2  -4 -15   99.49   13.90
  -2   4  15  112.69   12.50
  -2  -4 -15   83.09   12.40
  -2  -4 -15   97.19    9.60
  -2   4  15  103.49   12.00
   2   4 -15   78.89   12.20
  -2  -4  15  109.69   11.90
   2  -4 -15   89.89   12.30
   2   4  15  100.19   11.60
   2   4  15  106.69   13.00
  -2   4 -15  111.79   14.60
  -3  -4 -15  140.89   12.10
   3   4 -15  129.79   13.90
  -3   4  15  118.99   14.00
  -3  -4 -15  145.19   13.20
  -3  -4 -15  162.68   15.50
  -3   4  15  142.49   13.60
  -3   4 -15  132.69   15.50
  -3  -4  15  136.39   13.30
   3  -4 -15  162.18   16.00
   3   4  15  143.19   13.80
   3   4  15  151.88   15.90
  -4   4  15  111.89   13.20
   4   4 -15  101.99   13.30
  -4  -4 -15   93.89   11.70
  -4   4  15   89.99   13.40
  -4  -4 -15  127.09   13.20
  -4  -4 -15   97.39   13.70
  -4   4 -15   92.59   15.00
  -4  -4  15   90.09   12.90
  -4   4 -15  128.99   14.00
   4  -4 -15  123.99   13.80
   4   4  15   87.69   12.20
   4   4  15  134.69   15.50
  -5  -4 -15   69.49   13.90
  -5   4  15   84.79   13.30
  -5  -4 -15   89.19   13.20
  -5   4  15   90.49   12.70
   5   4 -15   86.29   12.30
   5   4  15   81.49   14.10
   5   4  15   62.89   11.60
  -5   4 -15   90.89   15.70
   5  -4 -15   88.79   12.70
  -5   4 -15   67.69   11.50
  -5  -4  15   59.09   11.80
  -6   4  15   19.70   10.10
  -6  -4 -15   21.90    8.80
  -6  -4  15   23.30    9.90
   6  -4 -15   12.70    8.50
   6   4  15    7.10    7.70
   0   5  15   76.99   11.90
   0  -5 -15   97.89   13.30
   0  -5 -15  113.19   13.70
   0   5  15   88.39   13.10
   0   5 -15   91.49   13.40
  -1  -5 -15   67.69   11.90
   1   5 -15   59.59   11.50
  -1   5  15   48.50    9.30
  -1  -5 -15   66.59   11.90
  -1   5  15   64.19   11.30
   1   5  15   85.09   11.60
   1   5  15   76.29   12.30
   1  -5 -15   69.19   11.80
  -1   5 -15   74.39   13.40
  -2   5  15   54.19   10.40
  -2  -5 -15   54.49   11.50
  -2  -5 -15   58.99   10.80
   2   5 -15   50.19   11.00
  -2   5  15   86.59   11.60
   2  -5 -15   47.00   11.00
  -2   5 -15   48.60   10.90
   2   5  15   68.89   12.60
   2   5  15   37.60    9.70
  -3  -5 -15  142.39   15.50
  -3  -5 -15   98.29   12.60
  -3   5  15  102.09   12.90
  -3   5  15  106.19   13.20
   3   5 -15  111.29   14.90
  -3   5 -15  129.49   16.00
   3   5  15  168.38   15.60
   3   5  15  108.69   15.50
   3  -5 -15  104.49   13.70
  -4  -5 -15    1.90    6.20
  -4   5  15    4.60    6.50
  -4   5  15   -1.60    6.50
  -4  -5 -15    4.10    7.50
   4   5 -15    7.10    7.50
  -4  -5  15   -5.20    5.90
  -4   5 -15    5.40    6.90
   4   5  15   -0.80    7.00
   4  -5 -15   -9.50    6.00
   4   5  15    5.10    7.40
  -5  -5 -15   37.30   10.70
  -5   5  15   38.30   11.60
  -5   5  15   14.00    7.60
   5   5 -15   24.30    8.90
   5  -5 -15   37.60   10.50
  -5  -5  15   55.39   11.80
   5   5  15   44.20   10.80
  -5   5 -15   55.79   11.60
  -5   5 -15   40.20   12.60
   5   5  15   42.40   11.40
   0   6  15  309.17   20.10
   0  -6 -15  318.97   21.50
   0   6  15  287.97   20.40
   0   6 -15  321.77   22.40
   0  -6 -15  275.67   20.30
  -1   6  15   66.19   12.40
  -1  -6 -15   60.69   11.70
   1   6 -15   58.39   13.00
  -1  -6 -15   42.30   11.30
  -1   6  15   54.79   10.80
   1  -6 -15   61.79   12.10
   1   6  15   51.69   11.30
  -1   6 -15   57.59   12.50
   1   6  15   38.70   10.10
  -2  -6 -15  142.89   15.30
   2   6 -15   77.69   13.20
  -2   6  15  107.59   14.90
  -2  -6 -15   95.79   14.30
  -2   6  15  112.09   13.10
   2   6  15  120.29   15.00
   2  -6 -15  103.59   15.20
   2   6  15   96.89   13.20
  -2   6 -15  120.69   16.80
   3   6 -15   45.90   10.90
  -3  -6 -15   35.60    9.30
  -3   6  15   32.70   10.40
  -3   6  15   43.20   10.20
  -3  -6 -15   28.10    9.50
   3   6  15   31.90    9.80
   3  -6 -15   37.30   10.10
  -3   6 -15   37.40   10.80
   3   6  15   35.00    9.80
  -4   6  15  144.39   17.10
  -4   6  15  118.39   17.20
  -4  -6 -15  155.68   15.70
   4   6 -15  143.69   16.30
  -4  -6 -15  135.69   18.10
   4   6  15  103.89   15.70
   4  -6 -15  144.79   16.10
  -4   6 -15  117.89   16.60
   4   6  15  121.99   15.80
   0  -7 -15    4.10    8.40
   0   7  15    3.00    8.10
  -1  -7 -15  108.79   15.10
  -1   7  15   80.49   14.00
   1   7 -15   91.69   24.00
   1  -7 -15   92.69   14.80
   1   7  15  115.79   14.80
  -2  -7 -15    5.70    8.60
   2   7  15   -3.00    7.50
   0   0  16   18.80    6.60
   0   0  16   16.80    2.90
   0   0 -16    8.00    6.10
   1   0 -16   60.09   10.20
  -1   0  16   59.89    5.70
   1   0  16   67.49    9.90
  -1   0  16   66.89   10.20
   1   0  16   67.29    4.50
  -1   0 -16   49.50    9.50
   2   0 -16  505.65   25.20
  -2   0 -16  526.95   24.90
   2   0  16  479.75   22.40
  -2   0  16  513.25   19.00
  -2   0 -16  462.85   23.90
  -2   0  16  534.95   24.30
  -3   0 -16  236.28   17.20
   3   0  16  238.08   14.90
  -3   0  16  222.28   16.20
   3   0 -16  240.28   17.00
  -3   0 -16  221.48   15.80
  -4   0  16   -7.50    5.80
  -4   0 -16   -2.40    5.00
   4   0 -16    4.10    5.60
  -4   0 -16    1.60    6.00
  -4   0 -16   -2.20    6.90
  -5   0 -16    1.80    7.20
  -5   0 -16   -4.30    5.70
  -5   0 -16    3.40    5.80
  -5   0  16    0.80    6.20
   5   0 -16    4.10    6.10
  -6   0  16   14.30    8.80
  -6   0 -16   23.60    9.80
  -6   0 -16   10.10    7.60
  -7   0 -16   -4.40    6.60
   0  -1 -16   37.10    8.70
   0  -1  16   32.90    7.40
   0   1  16   39.10    8.40
   0   1  16   20.40    4.40
   0   1 -16   21.00    8.10
   1  -1  16  133.49   11.10
  -1   1  16  102.09   12.20
  -1  -1 -16  113.09   11.20
   1   1 -16  108.99   12.40
  -1   1  16  101.19    8.30
  -1  -1 -16  108.29   12.20
   1   1  16   72.09   10.30
   1  -1 -16  126.29   13.90
   1   1  16  115.79    7.80
  -1   1 -16  104.59   12.40
  -1  -1  16  120.99   11.50
   2   1 -16   -0.50    6.00
  -2  -1 -16    5.60    6.40
   2  -1  16    2.00    4.70
  -2  -1 -16    7.00    5.50
  -2   1  16    6.20    5.60
  -2   1  16    3.30    4.30
   2   1  16   -6.30    5.20
  -2   1 -16    8.70    6.40
   2   1  16   -0.10    3.30
  -2  -1  16    5.50    6.20
   2  -1 -16    4.00    5.70
   3   1 -16  632.04   28.20
  -3  -1 -16  610.94   26.70
  -3   1  16  567.54   26.90
  -3  -1 -16  605.94   27.40
  -3   1  16  642.34   24.90
   3   1  16  579.64   25.90
  -3   1 -16  603.14   27.00
  -3   1 -16  658.83   29.50
   3  -1 -16  645.54   28.30
   3   1  16  630.64   22.20
  -3  -1  16  580.64   27.10
  -4  -1 -16   29.50    9.60
  -4   1  16   34.60    8.70
  -4  -1 -16   27.30    6.60
  -4  -1 -16   24.90    7.70
  -4  -1 -16   44.90    9.60
   4   1 -16   18.90    7.50
   4   1  16   22.80    7.50
  -4  -1  16   39.40    9.30
  -4   1 -16   23.10    9.00
  -4   1 -16   15.80    6.50
   4  -1 -16   26.40    7.60
  -4   1 -16   24.40    7.60
  -5   1  16  324.07   19.50
   5   1 -16  267.77   17.30
  -5  -1 -16  262.17   18.60
  -5  -1 -16  263.37   19.70
  -5  -1 -16  252.47   16.10
   5  -1 -16  264.37   18.20
  -5   1 -16  252.37   16.80
  -5  -1  16  242.88   19.00
  -5   1 -16  279.57   21.60
  -5   1 -16  246.68   16.90
  -6  -1 -16   49.00   11.60
  -6  -1 -16   32.70   10.10
  -6   1  16   45.80   10.60
  -6  -1  16   45.60   11.00
  -6   1 -16   47.40   11.70
  -6   1 -16   61.09    9.80
  -7   1 -16  245.78   16.60
   0   2  16   -3.40    4.90
   0   2  16    3.10    4.30
   0  -2 -16    1.10    4.30
   0   2 -16    0.60    5.80
   0  -2  16    1.90    4.80
   0  -2 -16    9.20    6.80
   1  -2  16  166.68   12.10
  -1  -2 -16  149.09   11.70
   1   2 -16  139.59   14.10
  -1   2  16  170.78   13.90
  -1   2  16  162.58   11.10
  -1  -2 -16  125.69   14.20
   1  -2 -16  169.38   15.50
  -1  -2  16  159.68   12.70
   1   2  16  148.49   10.40
  -1   2 -16  136.39   14.00
   1   2  16  157.48   13.90
  -2  -2 -16  167.78   14.30
  -2  -2 -16  160.88   13.00
   2   2 -16  176.98   14.90
   2  -2  16  176.98   17.90
  -2   2  16  159.18   13.70
  -2   2  16  143.79   11.90
   2   2  16  155.58   10.90
  -2  -2  16  161.78   13.30
   2  -2 -16  130.59   13.80
   2   2  16  152.38   13.70
  -2   2 -16  172.48   15.70
  -3  -2 -16   24.10    7.90
   3   2 -16   51.79   10.20
  -3  -2 -16   31.90    8.70
  -3  -2 -16   43.90    7.90
  -3   2  16   61.79   10.60
  -3   2  16   47.90    8.80
  -3  -2 -16   40.90    9.80
   3  -2 -16   44.90    9.70
   3   2  16   36.40    9.20
   3   2  16   41.90    7.30
  -3   2 -16   49.20   10.20
  -3  -2  16   33.50    8.60
  -4  -2 -16    5.20    5.80
  -4  -2 -16   -2.20    5.80
  -4   2  16    7.00    6.30
  -4   2  16   10.40    6.40
  -4  -2 -16   10.40    7.60
  -4  -2 -16   21.90    6.00
   4   2 -16   12.90    6.70
   4  -2 -16    7.90    6.80
  -4   2 -16    6.60    5.50
  -4   2 -16   -1.40    7.90
  -4  -2  16   12.10    7.20
  -4   2 -16   18.10    7.50
   4   2  16    0.30    5.10
   4   2  16    8.80    6.50
  -5  -2 -16   18.30    8.70
   5   2 -16    8.10    6.20
  -5  -2 -16    9.10    7.20
  -5  -2 -16   -3.10    5.30
  -5   2  16   10.10    7.40
  -5  -2  16   12.20    7.40
   5   2  16    8.70    6.60
  -5   2 -16   19.30    6.40
  -5   2 -16   10.80    8.70
   5  -2 -16    9.00    7.70
  -5   2 -16   14.10    6.70
  -6   2  16    8.40    7.90
  -6  -2 -16   -2.60    7.40
  -6  -2 -16   14.40    8.70
  -6   2 -16    0.60    5.30
  -6  -2  16    4.90    7.80
  -6   2 -16   -4.10    7.40
   0   3  16   16.10    6.50
   0   3 -16    9.70    7.30
   0   3  16   12.10    6.80
   0  -3 -16   20.10    5.40
   0  -3  16   19.50    6.40
   0  -3 -16   22.20    8.10
  -1  -3 -16  666.53   24.50
  -1  -3 -16  624.54   29.50
  -1  -3 -16  649.64   28.90
   1   3 -16  719.43   31.30
  -1   3  16  669.73   29.00
  -1   3  16  647.04   26.50
  -1   3 -16  657.83   30.20
   1   3  16  690.43   26.40
   1  -3 -16  645.04   30.20
   1   3  16  698.73   29.40
  -1  -3  16  692.93   27.90
  -2  -3 -16   90.49   12.10
  -2  -3 -16   80.69   11.70
   2   3 -16   81.89   12.10
  -2  -3 -16   92.19   12.40
  -2  -3 -16   97.19   10.40
  -2   3  16   87.49   10.80
  -2   3  16   92.89   11.70
   2  -3 -16   98.79   12.80
  -2   3 -16   79.39   12.40
  -2  -3  16   88.89   11.00
   2   3  16   80.19   10.10
   2   3  16   91.29   12.10
   3   3 -16   78.29   11.90
  -3  -3 -16   69.09   10.50
  -3   3  16   90.99   11.60
  -3  -3 -16   84.59   12.90
  -3  -3 -16   85.09   10.90
  -3   3  16   86.39   11.30
  -3  -3 -16   98.99   12.80
   3   3  16   88.09   11.20
  -3   3 -16   86.29   13.40
   3  -3 -16   85.49   12.80
  -3  -3  16   74.29   11.10
   3   3  16   67.89   11.20
  -4  -3 -16  187.68   16.50
  -4  -3 -16  212.18   14.80
   4   3 -16  223.98   17.00
  -4   3  16  206.08   17.00
  -4   3  16  192.88   15.90
  -4  -3 -16  201.38   16.40
   4   3  16  223.48   15.60
  -4  -3  16  184.38   16.00
  -4   3 -16  237.38   17.60
   4   3  16  188.48   16.60
  -4   3 -16  202.78   18.20
  -5  -3 -16   75.99   12.40
  -5   3  16   89.39   13.60
  -5   3  16   87.99   12.40
   5   3 -16   85.29   12.30
  -5  -3 -16   93.59   13.60
  -5   3 -16   94.09    9.10
   5   3  16   64.99   11.80
   5   3  16   92.89   12.00
  -5  -3  16   81.09   12.80
  -5   3 -16  102.19   12.80
  -5   3 -16   70.09   13.60
  -6  -3 -16   19.40    9.80
  -6   3  16   33.20    9.70
   6   3  16   13.60    7.90
  -6  -3  16   15.40    8.60
  -6   3 -16   27.40    7.70
   0  -4 -16  219.88   16.70
   0   4  16  211.58   15.30
   0   4  16  206.38   16.10
   0   4 -16  179.88   16.50
  -1   4  16    5.20    6.30
  -1  -4 -16    4.20    6.60
   1   4 -16    9.00    7.10
  -1   4  16   13.30    6.60
  -1  -4 -16    8.80    7.70
   1   4  16   21.30    7.90
  -1   4 -16   14.80    7.80
   1  -4 -16   16.60    7.70
   1   4  16   11.20    6.40
   2   4 -16  104.29   13.40
  -2  -4 -16   92.49   12.10
  -2  -4 -16  108.69   13.70
  -2   4  16  127.49   13.70
  -2   4  16  102.19   12.40
   2  -4 -16   81.29   12.20
  -2   4 -16  143.89   15.40
   2   4  16  115.79   13.40
  -2  -4  16  128.89   12.90
   2   4  16   84.89   11.40
  -3  -4 -16    0.90    5.30
  -3  -4 -16    1.30    6.80
  -3   4  16    4.70    6.50
  -3  -4 -16    9.30    8.60
  -3   4  16    7.10    6.90
   3   4 -16   11.70    7.20
  -3  -4  16    0.10    5.90
   3   4  16   15.20    8.00
   3  -4 -16    6.70    7.10
   3   4  16    3.40    6.50
  -3   4 -16    1.40    7.60
  -4   4  16   36.60    9.30
  -4  -4 -16   26.50    9.40
  -4  -4 -16   15.50    7.70
  -4   4  16   24.90    8.60
  -4  -4 -16   38.40    9.20
   4   4 -16   38.90    9.90
   4   4  16   20.50    8.20
   4   4  16   24.40    8.70
   4  -4 -16   26.50    9.10
  -4   4 -16   43.50   10.70
  -4   4 -16   33.70   11.10
  -4  -4  16   27.70    9.10
   5   4 -16   30.10    9.30
  -5  -4 -16   24.70    9.30
  -5   4  16   31.00    9.40
  -5  -4 -16   33.90   10.40
  -5   4  16   15.90    7.50
   5   4  16   22.30    9.30
  -5  -4  16   29.60    9.80
   5   4  16   29.40    9.90
  -5   4 -16   31.40   12.00
  -5   4 -16   35.60    9.80
   5  -4 -16   24.80    9.30
   0   5  16   39.00    9.40
   0   5  16   33.00    9.00
   0  -5 -16   44.10   10.60
   0   5 -16   31.80   10.40
   0  -5 -16   31.60   10.00
  -1  -5 -16  105.29   14.60
   1   5 -16   94.69   13.40
  -1  -5 -16  126.19   14.20
  -1   5  16  100.49   13.00
  -1   5  16   87.49   11.90
  -1   5 -16  119.49   15.00
   1  -5 -16  100.29   14.00
   1   5  16   95.69   14.00
   1   5  16   95.99   12.90
  -2   5  16   21.20    7.80
  -2  -5 -16   11.40    9.00
  -2   5  16   18.10    8.20
  -2  -5 -16   41.10   10.00
   2   5 -16   20.00    8.50
   2  -5 -16   13.10    7.80
  -2   5 -16   19.60   10.00
   2   5  16   32.10    9.10
   2   5  16   31.20   10.30
  -3   5  16   91.59   12.00
   3   5 -16  109.99   14.90
  -3  -5 -16   92.09   13.50
  -3   5  16   97.49   13.00
  -3  -5 -16  120.09   15.90
   3  -5 -16   92.29   13.90
   3   5  16   99.19   13.70
  -3   5 -16  108.39   14.60
   3   5  16  107.69   15.60
  -4   5  16   24.70    8.70
   4   5 -16   17.90    8.60
  -4  -5 -16   22.30    9.70
  -4   5  16   38.60   10.00
  -4  -5 -16   26.50    8.80
   4   5  16   51.59   12.10
  -4   5 -16   39.90   11.20
   4   5  16   31.00   10.00
   4  -5 -16   37.60   10.20
   5   5 -16   19.20    8.40
  -5   5  16   38.70   12.00
   5   5  16   35.30   11.90
  -5   5 -16   21.10    9.40
   5  -5 -16   32.70   10.50
  -5  -5  16   24.70    9.40
   5   5  16   27.80    9.40
   0   6  16    7.10    6.50
   0  -6 -16   -2.00    7.30
   0   6  16    5.40    7.60
   0   6 -16   -5.60    7.90
   0  -6 -16    1.20    8.40
  -1  -6 -16   -0.10    8.10
  -1   6  16   -0.80    7.00
  -1  -6 -16   12.80    8.00
  -1   6  16    4.30    7.20
   1   6 -16    4.50    7.60
   1   6  16   20.00    9.10
   1   6  16    3.30    8.20
  -1   6 -16    0.00    7.40
   1  -6 -16   -3.10    7.00
  -2   6  16   10.90    7.80
  -2  -6 -16    6.60    8.40
  -2   6  16   11.10    7.40
   2   6 -16   11.40    9.10
  -2  -6 -16   23.70    9.40
   2   6  16   17.40    9.20
   2  -6 -16    5.30    7.70
   2   6  16   13.40    7.60
  -2   6 -16   -1.90    7.30
  -3   6  16    2.80    7.00
   3   6 -16    6.40    7.80
  -3  -6 -16   22.90    9.30
  -3   6  16    8.40    7.80
  -3  -6 -16   26.90    9.40
   3   6  16   12.60    8.70
   3   6  16   10.00    8.30
   3  -6 -16   15.90    9.80
  -3   6 -16   21.80   10.60
   0   7  16  351.86   23.50
  -1   7  16   51.19   13.40
   1   7  16   55.29   11.70
   0   0  17   16.50    6.50
   0   0 -17    1.10    6.20
   1   0  17  124.39   11.80
   1   0 -17  122.29   13.20
  -1   0 -17  119.79   13.20
  -1   0  17  124.89    8.00
  -1   0  17  147.69   13.70
  -2   0 -17   29.30    8.10
  -2   0  17   36.10    8.50
  -2   0  17   43.50    6.20
   2   0 -17   30.50    8.40
   2   0  17   32.10    7.60
  -2   0 -17   33.10    8.70
   3   0  17  269.67   16.70
  -3   0 -17  245.58   17.90
   3   0 -17  271.37   18.60
  -3   0  17  255.27   18.10
  -3   0 -17  253.27   18.10
  -4   0  17   -2.80    6.30
  -4   0 -17    0.30    5.90
  -4   0 -17    3.30    7.00
  -4   0 -17   13.50    7.00
   4   0 -17   11.00    7.30
  -5   0 -17  540.35   24.70
  -5   0 -17  522.95   25.40
  -5   0  17  520.65   26.50
  -5   0 -17  530.25   28.70
   5   0 -17  491.45   24.80
  -6   0 -17   16.30   10.10
  -6   0  17   34.10    9.90
  -6   0 -17   29.80    9.00
   0   1  17   82.79    6.90
   0   1  17   76.29   11.20
   0  -1 -17   72.99   11.50
   0  -1  17   65.59    9.80
   0   1 -17   70.99   11.40
  -1  -1 -17   63.09    9.80
  -1  -1 -17   66.79   11.00
   1  -1  17   69.19   10.00
  -1   1  17   69.89   10.60
   1   1 -17   75.09   11.60
  -1   1  17   58.09    7.00
   1   1  17   72.69   11.00
   1  -1 -17   72.59   11.70
   1   1  17   63.69    6.30
  -1   1 -17   75.69   11.80
  -1  -1  17   61.99   10.00
  -2   1  17   40.50    8.90
   2  -1  17   51.09    8.50
  -2  -1 -17   62.69    9.80
  -2   1  17   64.19    7.80
   2   1 -17   69.59   11.30
  -2  -1 -17   54.99   10.00
   2  -1 -17   58.89   10.40
  -2   1 -17   79.09   11.70
   2   1  17   68.59   10.50
  -2  -1  17   60.59   10.40
  -3   1  17  117.69   10.90
  -3  -1 -17  122.29   13.70
  -3   1  17  114.99   12.70
   3   1 -17  111.79   12.80
  -3  -1 -17  105.69   12.70
  -3   1 -17  104.39   12.50
   3   1  17  121.69   12.90
  -3   1 -17  103.49   14.10
  -3  -1  17   88.19   12.00
   3  -1 -17  121.69   14.30
  -4  -1 -17   93.29   13.10
  -4  -1 -17   82.39   12.40
  -4  -1 -17   90.89   11.80
  -4   1  17   74.89   11.80
   4   1 -17   83.29   12.60
  -4  -1 -17   78.89    9.20
  -4   1 -17   77.19   10.50
  -4   1 -17   88.79   13.30
   4  -1 -17   79.79   11.60
   4   1  17   87.49   13.00
  -4  -1  17   80.29   12.40
  -4   1 -17  101.09   12.60
  -5  -1 -17    8.40    6.40
  -5  -1 -17   15.60    8.90
  -5  -1 -17   23.20    8.20
  -5   1  17    2.00    6.70
   5   1 -17   10.20    6.30
  -5   1 -17   11.20    6.60
  -5  -1  17   12.50    8.30
  -5   1 -17    7.00    8.20
   5  -1 -17    9.90    7.10
  -5   1 -17   11.50    6.70
  -6   1  17   18.30    8.20
  -6  -1 -17   37.00   12.10
  -6  -1 -17   37.40    9.90
  -6  -1  17   23.80    9.80
  -6   1 -17   33.10   11.60
  -6   1 -17   21.90    7.40
   0  -2 -17   32.70    6.60
   0   2  17   30.80    6.10
   0  -2  17   34.00    7.60
   0   2 -17   39.80    9.90
   0   2  17   44.10    9.20
   0  -2 -17   22.80    8.40
  -1  -2 -17  162.98   12.20
  -1  -2 -17  169.98   16.00
  -1   2  17  185.68   12.10
   1   2 -17  171.98   15.50
   1  -2  17  160.98   12.50
  -1   2  17  172.78   14.70
  -1   2 -17  194.78   17.20
  -1  -2  17  152.08   13.20
   1  -2 -17  177.88   16.50
   1   2  17  178.78   14.90
   1   2  17  167.98   11.00
   2   2 -17  120.59   13.40
  -2   2  17   90.39    9.70
  -2  -2 -17  106.89   11.60
  -2   2  17  115.09   12.60
  -2  -2 -17   86.49   12.00
  -2   2 -17  110.09   13.30
   2   2  17   99.59    9.20
   2  -2 -17  110.39   14.40
  -2  -2  17  111.79   12.80
   2   2  17   97.59   12.00
  -3  -2 -17  173.88   12.80
  -3   2  17  153.48   15.00
   3   2 -17  163.78   15.00
  -3  -2 -17  152.38   14.10
  -3  -2 -17  143.09   14.70
  -3  -2 -17  156.28   14.80
  -3   2  17  158.18   13.20
   3   2  17  142.99   11.20
   3  -2 -17  192.08   16.00
  -3  -2  17  169.28   14.70
  -3   2 -17  145.19   14.40
   3   2  17  163.28   15.10
   4   2 -17   18.10    7.60
  -4  -2 -17    5.80    7.20
  -4  -2 -17   24.50    6.90
  -4   2  17   33.50    8.30
  -4  -2 -17   31.70    8.20
  -4   2  17   36.10    9.00
  -4  -2 -17   17.90    7.60
   4   2  17   38.20    9.90
  -4   2 -17   37.60   10.70
   4  -2 -17   34.70    9.60
  -4   2 -17   34.90    8.90
  -4  -2  17   42.60    9.60
  -5  -2 -17   61.09   11.40
  -5   2  17   58.69   10.90
  -5  -2 -17   61.79   12.50
  -5   2  17   64.69   10.90
   5   2 -17   68.89   11.20
  -5  -2 -17   64.99   10.30
  -5   2 -17   64.59   10.70
  -5   2 -17   62.09   12.80
  -5  -2  17   73.59   12.80
  -5   2 -17   67.69    9.50
   5  -2 -17   67.69   11.90
  -6  -2 -17   27.10   10.80
  -6  -2  17   36.00    9.60
  -6   2 -17   11.90    6.50
   0  -3 -17   41.60   10.10
   0   3  17   24.20    8.10
   0   3 -17   30.90    9.00
   0   3  17   28.80    6.90
   0  -3  17   33.80    7.60
  -1  -3 -17   54.69   11.20
  -1   3  17   55.59   10.60
  -1   3  17   48.30    8.70
   1   3 -17   44.80   10.10
  -1  -3 -17   53.79    8.20
  -1  -3 -17   47.40    9.70
   1   3  17   49.90    9.80
  -1  -3  17   52.59    8.80
   1   3  17   45.20    7.90
  -1   3 -17   54.69   11.70
   1  -3 -17   39.70    9.90
  -2  -3 -17  156.18   14.50
  -2  -3 -17  159.48   14.90
  -2  -3 -17  140.49   12.00
  -2   3  17  157.58   14.50
  -2   3  17  151.48   13.10
   2   3 -17  174.58   16.40
  -2  -3 -17  183.88   16.60
   2   3  17  175.48   12.60
  -2   3 -17  178.18   16.10
   2  -3 -17  169.78   16.10
   2   3  17  149.69   15.40
  -2  -3  17  143.99   14.10
  -3  -3 -17  156.88   16.20
   3   3 -17  163.78   16.10
  -3   3  17  171.38   14.60
  -3  -3 -17  142.89   14.10
  -3  -3 -17  146.89   13.60
  -3   3  17  143.39   13.50
  -3  -3 -17  144.09   13.30
  -3  -3  17  103.59   13.70
   3  -3 -17  143.49   15.30
  -3   3 -17  130.39   15.20
   3   3  17  124.69   12.00
   3   3  17  165.28   15.20
  -4  -3 -17   13.20    7.80
  -4   3  17    6.90    6.30
   4   3 -17   14.20    7.90
  -4  -3 -17   14.00    6.50
  -4  -3 -17    8.30    7.60
  -4   3  17   15.90    7.70
  -4  -3  17   12.30    7.60
  -4   3 -17   16.70    9.00
   4   3  17   14.00    6.70
  -4   3 -17    4.10    7.00
   4   3  17    9.10    7.40
  -5   3  17   88.49   13.50
  -5   3  17   92.79   14.00
  -5  -3 -17   53.49   11.70
  -5  -3 -17   77.19   13.20
   5   3 -17   65.49   11.70
  -5   3 -17   63.99   11.40
   5   3  17   86.59   14.90
  -5   3 -17   63.09   14.00
  -5  -3  17   85.29   13.70
  -5   3 -17   63.49    9.20
   5   3  17   63.79   12.30
  -6  -3 -17   53.89   12.20
  -6   3  17   51.89   12.00
  -6  -3  17   30.30    9.90
   0  -4 -17   11.40    7.60
   0   4 -17   -9.40    5.40
   0   4  17    3.50    5.70
   0   4  17   -4.90    6.30
  -1   4  17   45.00    9.80
  -1   4  17   35.90    8.10
  -1  -4 -17   33.00    9.90
  -1  -4 -17   26.20    8.90
   1   4 -17   49.50   11.90
  -1   4 -17   33.40   10.20
   1   4  17   44.60   10.00
   1  -4 -17   29.90    9.90
   1   4  17   36.40    8.50
  -2   4  17  173.28   15.30
  -2   4  17  158.28   14.40
  -2  -4 -17  191.68   15.70
  -2  -4 -17  158.58   16.90
   2   4 -17  198.58   17.30
  -2  -4  17  171.58   14.30
  -2   4 -17  161.28   17.70
   2  -4 -17  182.28   16.40
   2   4  17  196.98   14.80
   2   4  17  193.38   17.50
  -3   4  17    8.60    7.10
  -3   4  17    1.90    6.60
   3   4 -17   -5.40    5.70
  -3  -4 -17   -3.50    5.40
  -3  -4 -17    1.50    7.80
   3  -4 -17   -5.70    6.40
   3   4  17    4.90    6.40
   3   4  17   -9.60    5.70
  -3  -4  17   -1.80    5.80
  -3   4 -17  -10.80    5.80
  -4   4  17  129.69   13.90
  -4  -4 -17  108.99   15.50
  -4  -4 -17   85.79   12.40
  -4   4  17  120.39   14.50
  -4  -4 -17  157.98   14.30
   4   4 -17   90.89   12.80
  -4   4 -17  116.99   15.90
  -4  -4  17  108.49   13.40
   4   4  17  116.09   14.80
   4   4  17  105.69   13.00
   4  -4 -17   98.99   14.70
  -4   4 -17  122.49   15.40
   5   4 -17   38.70    9.90
  -5   4  17   44.40   10.70
  -5  -4 -17   39.90   10.40
  -5   4 -17   25.90    9.60
   5   4  17   28.50    9.40
  -5  -4  17   42.60   11.30
   5   4  17   29.40    9.70
   5  -4 -17   47.40   11.70
   0   5  17   21.30    8.00
   0   5  17   36.10   10.10
   0  -5 -17   56.59   12.40
   0  -5 -17   40.90    9.80
   0   5 -17   40.40   10.70
  -1  -5 -17   15.90    8.80
  -1   5  17    7.60    7.50
   1   5 -17   15.60    9.40
  -1  -5 -17    7.80    8.60
  -1   5  17   19.90    8.50
   1   5  17    7.60    7.30
   1   5  17    4.80    7.20
  -1   5 -17    3.20    8.70
   1  -5 -17    2.00    7.10
   2   5 -17   35.30   10.20
  -2  -5 -17   30.30   10.30
  -2   5  17   42.00   10.10
  -2  -5 -17   15.50    9.70
  -2   5  17   26.60    8.50
   2  -5 -17   26.40    9.40
  -2   5 -17   33.90   10.60
   2   5  17   17.10    9.00
   2   5  17   28.90    8.90
  -3   5  17   33.00    9.40
  -3   5  17   54.39   10.80
  -3  -5 -17   28.00    9.30
  -3  -5 -17   48.70   12.30
   3   5 -17   49.60   10.90
  -3   5 -17   48.90   11.40
   3  -5 -17   40.10   10.60
   3   5  17   40.40   11.70
   3   5  17   54.39   10.80
   4   5 -17   23.40    9.40
  -4   5  17    6.80    8.20
  -4   5  17   -3.80   10.30
  -4  -5 -17   34.20   10.90
  -4  -5 -17   29.50    9.30
  -4   5 -17   24.70    9.90
   4   5  17   12.30    8.80
   4  -5 -17   27.10   10.60
   4   5  17   32.40    9.90
   0   6  17  166.48   16.10
   0  -6 -17  147.79   16.50
   0   6  17  139.19   15.00
   0   6 -17  147.39   17.00
  -1   6  17   -8.00    5.90
  -1  -6 -17   26.50   10.10
  -1  -6 -17   10.30    8.60
   1   6 -17    2.60    7.30
  -1   6  17   -8.80    6.50
   1   6  17   -9.70    6.40
   1   6  17    3.80    7.70
   1  -6 -17    1.20    8.50
  -1   6 -17    2.20    7.80
  -2   6  17   29.30   10.40
  -2  -6 -17   43.40   10.90
  -2   6  17   31.70   14.20
   2   6 -17   30.70   10.40
  -2  -6 -17   35.60   10.00
   2  -6 -17   29.70    9.60
  -2   6 -17   42.00   11.90
   2   6  17   15.50    7.90
   2   6  17   39.60   10.70
  -3   6  17   14.50    9.20
  -3  -6 -17   13.90    7.80
   3   6 -17   10.50    9.20
  -3  -6 -17   23.90   10.80
   3   6  17   17.00    9.80
  -3   6 -17   20.30   10.70
   0   0 -18  184.48   15.80
   0   0  18  164.98   13.90
   1   0 -18   20.40    7.90
   1   0  18   34.10    8.10
  -1   0 -18   34.50    9.80
  -1   0  18   38.90    9.40
   2   0 -18    3.00    5.90
   2   0  18    3.90    6.00
  -2   0  18    7.70    7.00
  -2   0 -18   -3.50    6.10
  -2   0 -18    4.50    7.40
   3   0  18  120.69   13.70
   3   0 -18  168.98   15.50
  -3   0 -18  128.19   14.10
  -3   0 -18  123.79   14.00
  -3   0  18  132.69   14.00
  -4   0 -18   16.90    7.70
  -4   0 -18   19.50    7.90
  -4   0  18   22.50    8.20
   4   0 -18   15.00    8.00
  -4   0 -18    3.60    7.00
  -5   0 -18   10.20    7.30
  -5   0 -18   -0.60    9.00
  -5   0  18    6.90    8.00
   5   0 -18   10.60    7.60
  -5   0 -18   13.40    7.30
  -6   0 -18   57.59   12.80
  -6   0 -18   64.29   11.40
   0  -1 -18  130.89   15.40
   0   1 -18  157.58   15.10
   0  -1  18  163.88   13.30
   0   1  18  149.69   13.80
  -1   1  18  420.26   21.80
  -1  -1 -18  358.86   19.70
  -1  -1 -18  395.46   23.20
   1   1 -18  364.46   21.80
   1  -1  18  367.06   20.00
  -1   1  18  372.06   16.20
  -1   1 -18  378.16   22.20
  -1  -1  18  398.06   21.00
   1   1  18  413.66   21.30
   1  -1 -18  402.66   22.70
  -2  -1 -18   58.39   10.90
  -2   1  18   58.39   10.30
   2  -1  18   50.79    8.70
  -2   1  18   42.00    7.10
   2   1 -18   55.59   10.60
  -2  -1 -18   59.09   10.30
  -2  -1  18   57.79   10.10
   2   1  18   64.39   10.30
   2  -1 -18   60.29   10.90
  -2   1 -18   64.69   11.10
  -3   1  18  478.95   20.90
  -3  -1 -18  483.95   24.30
  -3  -1 -18  461.25   24.70
   3   1 -18  514.55   25.60
  -3   1  18  480.55   24.80
  -3  -1  18  489.35   24.90
  -3   1 -18  452.55   25.40
  -3   1 -18  462.45   24.40
   3  -1 -18  477.35   25.70
   3   1  18  497.75   24.00
  -4  -1 -18  213.28   13.90
  -4  -1 -18  205.98   18.20
  -4  -1 -18  232.88   17.80
   4   1 -18  192.08   16.90
  -4   1  18  223.48   17.50
  -4   1  18  214.68   14.70
  -4  -1 -18  216.98   16.50
  -4   1 -18  217.18   17.00
   4  -1 -18  222.48   18.10
  -4  -1  18  192.98   16.50
  -4   1 -18  235.48   16.10
   5   1 -18  208.88   16.50
  -5  -1 -18  215.68   18.90
  -5   1  18  267.57   19.20
  -5  -1 -18  270.17   19.40
  -5  -1 -18  240.18   17.00
  -5  -1  18  266.97   20.20
  -5   1 -18  267.67   20.90
   5  -1 -18  251.87   18.00
  -5   1 -18  280.47   18.20
  -5   1 -18  268.77   17.40
  -6  -1 -18  134.09   16.50
  -6  -1  18  156.18   25.50
  -6   1 -18  137.09   14.00
   0   2 -18   10.50    7.30
   0   2  18   15.70    7.30
   0   2  18   11.30    4.70
   0  -2  18   12.60    6.30
   0  -2 -18   13.30    5.60
   0  -2 -18   29.70   10.00
  -1   2  18   31.40    8.80
   1   2 -18   18.40    8.10
  -1   2  18   27.00    6.50
  -1  -2 -18   18.90    8.90
   1  -2  18   26.70    7.00
  -1  -2 -18   40.50    7.90
   1  -2 -18   27.70    9.30
   1   2  18   37.90    9.70
   1   2  18   21.10    5.50
  -1   2 -18   43.10   10.00
  -1  -2  18   29.00    8.30
  -2   2  18   10.70    5.50
   2   2 -18   12.10    7.10
  -2   2  18   14.60    7.90
  -2  -2 -18   19.80    7.40
  -2  -2 -18   -3.40    5.90
  -2   2 -18   21.20    7.80
   2  -2 -18    7.30    8.20
  -2  -2  18   19.40    7.90
   2   2  18   14.30    7.40
  -3  -2 -18    3.00    6.20
  -3   2  18   -3.10    5.10
  -3   2  18    4.40    6.70
   3   2 -18   -1.20    6.20
  -3  -2 -18   12.60    7.10
  -3  -2 -18    9.40    7.40
  -3  -2 -18   -7.60    5.70
  -3  -2  18    0.40    6.60
  -3   2 -18   12.50    8.10
   3  -2 -18   -6.40    5.60
   3   2  18   -5.40    5.00
  -4   2  18   91.79   11.70
   4   2 -18   84.29   12.00
  -4  -2 -18   79.69   10.90
  -4   2  18   96.99   12.80
  -4  -2 -18  114.09   14.30
  -4  -2 -18   77.69   12.10
  -4  -2 -18   67.19   11.70
   4  -2 -18  118.89   13.60
  -4   2 -18   93.09   13.30
  -4  -2  18   92.99   13.40
   4   2  18  105.99   13.90
  -4   2 -18   96.29   15.30
  -5  -2 -18   76.09   13.50
  -5   2  18   88.89   12.80
   5   2 -18   61.59   10.70
  -5  -2 -18   68.69   12.00
  -5   2  18   56.39   11.10
  -5  -2 -18  109.79   13.70
  -5   2 -18   77.19   10.40
  -5   2 -18   80.99   14.40
  -5   2 -18   77.29   12.20
   5  -2 -18   85.19   13.30
  -5  -2  18   93.09   13.90
  -6  -2 -18  -18.20    5.90
  -6   2 -18    5.40    5.90
   0   3  18   35.00    7.40
   0   3  18   31.00    8.90
   0   3 -18   26.50    9.20
   0  -3 -18   23.50    8.90
   1   3 -18  152.78   16.20
  -1   3  18  150.58   14.50
  -1  -3 -18  188.78   16.10
  -1  -3 -18  142.19   15.00
  -1   3  18  127.99   11.90
  -1  -3  18  125.59   12.20
   1   3  18  137.49   11.60
   1   3  18  141.89   14.10
  -1   3 -18  103.59   15.50
   1  -3 -18  164.38   16.00
  -2  -3 -18  359.96   21.70
  -2  -3 -18  339.47   19.70
  -2  -3 -18  336.57   18.10
   2   3 -18  348.97   22.60
  -2   3  18  316.87   18.40
  -2   3  18  322.67   20.50
  -2  -3 -18  335.97   21.70
   2  -3 -18  347.17   22.90
   2   3  18  297.67   16.60
  -2   3 -18  299.17   20.90
   2   3  18  334.27   20.90
  -2  -3  18  308.67   19.10
  -3   3  18   69.29   10.90
  -3  -3 -18   72.69   11.00
  -3   3  18   76.19   12.50
  -3  -3 -18   62.39   10.50
  -3  -3 -18   91.29   13.30
   3   3 -18   60.49   11.40
  -3  -3 -18   70.09   12.40
   3   3  18   86.89   10.70
  -3  -3  18   51.49   10.30
   3   3  18   69.69   12.50
  -3   3 -18   80.99   13.50
   3  -3 -18   82.19   14.00
  -4  -3 -18  124.69   14.40
  -4  -3 -18  149.59   15.60
  -4  -3 -18  120.49   12.40
   4   3 -18  154.48   14.90
  -4   3  18  128.59   13.90
  -4   3  18  135.89   15.10
   4   3  18  103.19   13.80
  -4  -3  18  119.59   14.00
  -4   3 -18  140.19   17.70
  -4   3 -18  138.39   15.70
   5   3 -18   28.40    9.00
  -5  -3 -18   33.60    9.50
  -5   3  18   39.10   12.30
  -5   3  18   37.90   10.40
  -5  -3 -18   45.70   11.80
  -5   3 -18   66.89    9.10
  -5   3 -18   55.09   13.50
  -5   3 -18   68.99   11.80
  -5  -3  18   37.40    9.90
   0   4  18   12.00    6.90
   0  -4 -18   31.80    9.50
   0   4 -18    3.10    7.40
   0   4  18   26.60    9.10
   1   4 -18   41.90   11.50
  -1   4  18   24.00    8.30
  -1  -4 -18   54.59   10.90
  -1   4  18   49.50   10.40
   1   4  18   59.79   10.10
   1  -4 -18   44.90   10.80
   1   4  18   44.40   10.70
  -1   4 -18   56.19   11.90
   2   4 -18   18.80    8.70
  -2  -4 -18   12.60    7.50
  -2  -4 -18   10.20    7.90
  -2   4  18    7.80    6.30
  -2   4  18   -3.60    6.70
  -2   4 -18    5.80    8.20
   2  -4 -18   19.30    8.00
   2   4  18    3.50    6.60
   2   4  18   12.40    7.40
   3   4 -18   45.90   10.60
  -3  -4 -18   34.90   10.60
  -3  -4 -18   44.30    9.60
  -3   4  18   67.39   11.90
  -3   4  18   35.70    9.40
   3   4  18   51.29    9.80
  -3   4 -18   48.60   11.40
   3   4  18   32.40   10.80
  -3  -4  18   46.10   10.30
   3  -4 -18   59.59   11.90
   4   4 -18   19.90    9.20
  -4   4  18   20.80    8.80
  -4  -4 -18    8.90    7.20
  -4   4  18   17.80    8.60
  -4  -4 -18    6.10    8.70
   4   4  18   26.90    9.60
   4  -4 -18   21.90    9.10
  -4   4 -18   21.30    8.50
  -4  -4  18    9.10    7.90
  -4   4 -18   25.80   11.70
   4   4  18   23.20    8.10
  -5   4  18    7.50    8.30
   5   4 -18   -1.30    6.70
   5   4  18   10.40    9.00
   5  -4 -18   11.50    8.40
  -5  -4  18   21.70    9.10
  -5   4 -18   19.70    8.80
   0  -5 -18  194.38   18.20
   0  -5 -18  195.88   17.70
   0   5  18  203.38   16.60
   0   5  18  177.58   16.70
   0   5 -18  201.88   18.70
  -1  -5 -18   29.60   10.20
   1   5 -18   15.50    8.80
  -1   5  18   40.10    9.90
  -1  -5 -18   32.70    9.90
  -1   5  18   22.80    9.10
   1   5  18   20.40    8.40
   1   5  18   23.80    9.10
  -1   5 -18   17.90   10.50
   1  -5 -18   18.70    8.90
  -2  -5 -18  347.27   24.20
  -2   5  18  384.16   22.80
   2   5 -18  356.86   24.50
  -2  -5 -18  356.56   23.10
  -2   5  18  339.67   21.70
   2   5  18  394.46   22.10
   2   5  18  435.56   24.90
  -2   5 -18  373.06   24.70
   2  -5 -18  333.87   22.70
  -3   5  18   14.30    8.60
  -3  -5 -18    9.70    9.30
  -3   5  18   12.20    7.70
  -3  -5 -18   10.60    8.40
   3   5 -18   -0.60    7.20
   3   5  18    6.20    8.80
   3  -5 -18   23.70   10.10
   3   5  18    7.20    7.70
  -3   5 -18   19.30   10.10
   4   5 -18   68.09   13.10
  -4  -5 -18   88.89   13.20
  -4   5  18   90.99   14.20
   4   5  18   90.09   13.70
  -4   5 -18   97.89   14.60
   4  -5 -18  101.19   16.10
   4   5  18  132.89   17.30
   0   6  18   56.09   12.10
   0  -6 -18   65.39   13.00
  -1  -6 -18   21.80   10.00
  -1   6  18   22.80    8.90
  -1  -6 -18   47.80   11.80
   1   6  18   13.20    7.60
   1  -6 -18   34.90   10.80
  -2  -6 -18   51.49   12.50
  -2   6  18   50.09   11.50
  -2  -6 -18   79.89   13.30
   2   6  18   58.99   11.90
   0   0  19    4.30    6.50
   0   0 -19    4.50    6.50
   1   0  19  159.48   13.90
  -1   0 -19  171.28   15.90
  -1   0  19  143.89   14.70
   1   0 -19  158.88   15.30
  -2   0 -19  165.08   15.00
   2   0  19  176.08   14.90
  -2   0 -19  178.88   15.90
   2   0 -19  182.68   16.10
  -2   0  19  186.48   15.60
  -3   0 -19    0.00    6.00
  -3   0  19   19.50    8.30
   3   0 -19   18.60    8.50
  -3   0 -19    6.80    7.90
  -4   0 -19    4.10    6.80
  -4   0 -19   14.60    7.70
  -4   0  19   15.50    7.60
  -4   0 -19    9.00    7.90
   4   0 -19   11.10    7.00
  -5   0 -19   40.90   11.20
   5   0 -19   38.90    9.90
  -5   0 -19   62.39   11.10
  -5   0 -19   47.20    9.90
  -5   0  19   60.69   11.60
   0  -1  19  171.18   14.00
   0   1  19  194.78   15.60
   0  -1 -19  162.58   16.90
   0   1 -19  187.98   16.60
  -1   1  19   19.30    7.40
  -1  -1 -19    8.00    7.90
   1   1 -19   17.40    7.90
   1  -1  19   22.00    7.10
  -1  -1 -19   30.20    8.20
  -1  -1  19   20.20    7.90
   1  -1 -19   15.80    8.00
   1   1  19   15.30    6.90
  -1   1 -19   13.50    8.10
  -2  -1 -19  236.78   17.20
  -2   1  19  262.67   19.10
   2   1 -19  255.67   18.60
  -2  -1 -19  224.08   18.20
   2  -1 -19  216.98   17.80
   2   1  19  240.98   17.60
  -2  -1  19  240.68   17.40
  -2   1 -19  261.17   18.80
   3   1 -19   50.39   11.20
  -3  -1 -19   21.20    8.20
  -3   1  19   40.60   10.00
  -3  -1 -19   39.50    9.90
  -3  -1  19   33.40    9.60
  -3   1 -19   34.40    9.10
   3  -1 -19   22.20    8.40
   3   1  19   28.90    8.90
  -3   1 -19   30.60    9.80
  -4  -1 -19   86.79   14.00
  -4  -1 -19  114.19   13.60
   4   1 -19   87.59   12.20
  -4  -1 -19  110.29   13.50
  -4   1  19   80.09   13.10
  -4  -1 -19  128.69   15.60
  -4   1 -19  117.69   14.30
  -4  -1  19   98.79   13.30
  -4   1 -19   93.19   12.10
   4  -1 -19   92.49   14.30
  -4   1 -19  102.29   15.80
  -5  -1 -19   13.20    9.40
  -5  -1 -19   17.90    8.10
   5   1 -19    9.30    6.60
  -5   1  19   17.50    8.90
  -5  -1 -19    9.50    7.20
  -5   1 -19   20.20    8.20
  -5  -1  19    8.60    7.90
  -5   1 -19   15.30    9.30
   5  -1 -19   12.30    7.00
  -5   1 -19   13.80    7.70
   0   2 -19  301.87   20.60
   0  -2  19  298.47   17.90
   0  -2 -19  298.57   16.30
   0  -2 -19  272.97   20.20
   0   2  19  329.57   20.80
  -1   2  19  276.47   19.90
  -1  -2 -19  259.07   16.40
   1   2 -19  287.57   20.00
  -1  -2 -19  289.47   20.10
  -1   2  19  320.77   20.00
  -1  -2  19  272.47   17.50
   1  -2 -19  318.07   20.90
   1   2  19  267.57   18.80
  -1   2 -19  274.47   19.90
  -2  -2 -19  224.88   17.60
  -2   2  19  208.98   16.90
   2   2 -19  219.88   18.00
  -2  -2 -19  212.98   15.60
  -2   2  19  215.78   13.70
   2   2  19  252.17   18.40
  -2  -2  19  221.68   17.30
   2  -2 -19  228.58   18.50
  -2   2 -19  251.37   19.40
  -3  -2 -19   63.49   11.40
  -3  -2 -19   72.09   10.20
  -3   2  19   50.89    9.20
  -3  -2 -19   63.69   10.70
   3   2 -19   72.89   12.00
  -3  -2 -19   64.89   12.10
  -3   2  19   64.89   11.70
  -3  -2  19   81.39   12.40
  -3   2 -19   73.49   12.20
   3   2  19   82.29   12.60
  -3   2 -19   66.29   12.80
   3  -2 -19   67.09   11.90
  -4  -2 -19   34.30    7.90
  -4   2  19   25.90    8.30
  -4  -2 -19   35.80    9.50
   4   2 -19   40.30   10.20
  -4  -2 -19   28.60    9.80
  -4  -2 -19    9.10    7.30
  -4   2  19   23.10    9.10
   4  -2 -19   36.70    9.60
  -4  -2  19   19.90    9.00
  -4   2 -19   36.80    9.80
  -4   2 -19   44.90   11.80
  -5  -2 -19   25.80    9.60
   5   2 -19   31.10    9.50
  -5   2  19   14.60    8.10
  -5   2  19   27.80    9.00
  -5  -2 -19   46.70   11.60
  -5   2 -19   38.20    9.90
  -5  -2  19   24.70    9.70
  -5   2 -19   69.09   13.50
  -5   2 -19   39.70    8.70
   5  -2 -19   38.70   10.00
   0   3  19   77.09   10.00
   0   3  19   73.19   13.00
   0  -3 -19   73.09   12.50
   0   3 -19   71.99   13.00
  -1   3  19  271.37   19.00
   1   3 -19  235.98   20.10
  -1  -3 -19  263.17   18.40
  -1  -3 -19  268.17   19.80
  -1   3  19  266.07   16.30
   1   3  19  250.57   16.70
  -1   3 -19  272.67   21.20
   1  -3 -19  284.07   21.20
   1   3  19  267.77   18.80
   2   3 -19   44.30   10.70
  -2  -3 -19   51.29   11.50
  -2  -3 -19   33.60    9.90
  -2  -3 -19   22.80    8.90
  -2   3  19   40.40   10.30
  -2   3  19   37.90    8.00
   2   3  19   23.10    8.70
  -2   3 -19   39.00   10.40
  -2  -3  19   38.00    8.80
   2  -3 -19   37.70   10.30
  -3   3  19  344.07   21.40
  -3   3  19  308.47   18.90
  -3  -3 -19  341.77   21.30
   3   3 -19  341.57   22.90
  -3  -3 -19  384.56   21.10
  -3  -3 -19  324.37   19.50
  -3  -3 -19  348.67   22.30
   3   3  19  347.47   21.80
  -3  -3  19  319.97   20.60
  -3   3 -19  318.87   22.70
   3  -3 -19  301.87   21.70
   4   3 -19  115.39   15.20
  -4   3  19  121.69   13.50
  -4  -3 -19   85.19   13.70
  -4  -3 -19  130.09   14.40
  -4  -3 -19  141.89   13.50
  -4  -3 -19  116.09   14.30
  -4   3  19  126.89   14.20
   4   3  19  116.99   15.60
  -4   3 -19  139.79   17.10
  -4   3 -19  118.99   15.40
  -4  -3  19  103.19   14.00
  -5  -3 -19   11.90    8.20
  -5   3  19   17.30    7.80
   5   3 -19   22.30    8.60
  -5   3 -19   22.90    8.60
  -5   3 -19   12.70    6.40
  -5  -3  19   10.50    8.10
   0   4  19  303.57   18.40
   0  -4 -19  317.27   21.90
   0   4 -19  300.57   21.90
   0   4  19  325.87   21.10
  -1   4  19   38.30   10.50
  -1  -4 -19   52.89   11.00
   1   4 -19   63.09   12.80
  -1   4  19   36.40    8.80
   1   4  19   42.90   11.30
   1  -4 -19   36.00   10.30
   1   4  19   47.90    9.50
  -1   4 -19   40.40   11.60
  -2   4  19  163.08   14.80
   2   4 -19  146.89   16.40
  -2  -4 -19  180.28   16.70
  -2  -4 -19  153.18   16.40
  -2   4  19  165.48   16.00
   2   4  19  162.08   13.90
   2  -4 -19  156.18   16.50
   2   4  19  183.38   17.70
  -2   4 -19  189.98   18.10
  -3  -4 -19   35.40   10.00
   3   4 -19   36.60   11.10
  -3  -4 -19   17.10    7.50
  -3   4  19   11.40    7.50
  -3   4  19   41.40   10.40
   3   4  19    5.20    8.10
  -3   4 -19   15.40    9.40
   3  -4 -19   22.50    9.30
  -4  -4 -19   65.79   14.70
  -4  -4 -19   56.59   10.50
   4   4 -19   23.40    8.70
  -4   4  19   52.09   10.90
   4  -4 -19   62.49   12.60
  -4  -4  19   45.80   10.70
  -4   4 -19   56.89   11.90
   4   4  19   45.50   12.00
   0   5 -19   48.60   12.80
   0   5  19   46.90   10.40
   0  -5 -19   34.60    9.70
   0  -5 -19   42.30   11.20
   0   5  19   34.80    9.90
   1   5 -19   56.09   12.60
  -1   5  19   70.29   12.40
  -1  -5 -19   36.70   10.60
  -1  -5 -19   65.29   12.50
  -1   5  19   71.49   12.10
   1   5  19   61.39   10.80
   1  -5 -19   81.69   13.30
   1   5  19   76.99   13.10
  -1   5 -19   50.99   12.40
  -2   5  19   34.40    9.90
  -2   5  19   45.80   11.30
  -2  -5 -19   39.50   11.30
   2   5 -19   39.00   11.50
  -2  -5 -19   20.00    9.80
  -2   5 -19   44.40   11.60
   2  -5 -19   51.69   11.60
   2   5  19   39.50   10.30
   2   5  19   62.29   12.20
  -3  -5 -19   38.40   10.50
   3   5 -19    8.00    8.90
  -3   5  19   12.40    7.40
  -3  -5 -19    2.20    7.50
   3   5  19   15.90    9.00
  -3   5 -19   -0.50    8.60
   3   5  19    7.50    7.50
   3  -5 -19   20.90   11.10
   0   6  19   34.00   10.40
  -1  -6 -19   53.29   19.80
  -1  -6 -19   50.99   12.10
  -1   6  19   44.10   11.10
   1   6  19   50.99   11.50
   0   0  20  361.56   21.00
   0   0 -20  365.66   22.70
   1   0  20  244.78   16.90
  -1   0  20  203.88   17.00
   1   0 -20  224.78   18.10
  -1   0 -20  196.78   18.20
  -2   0 -20    0.40    7.40
   2   0 -20    7.00    7.20
  -2   0  20   19.60    7.70
  -2   0 -20    3.10    7.20
   2   0  20   -0.70    5.60
  -3   0  20   43.70   10.20
   3   0 -20   43.60   10.80
  -3   0 -20   63.99   12.10
  -3   0 -20   58.59   11.80
  -4   0 -20   32.20   10.20
  -4   0  20   23.30    8.80
  -4   0 -20   28.70    8.70
   4   0 -20   37.20    9.30
  -4   0 -20   15.60    7.70
  -5   0 -20   -2.70    7.20
  -5   0  20   -1.40    7.00
  -5   0 -20    5.90    8.60
  -5   0 -20   -2.50    6.10
   5   0 -20    5.20    7.70
   0  -1  20   76.29   10.80
   0   1 -20   51.69   11.20
   0  -1 -20   51.59   11.10
   0   1  20   81.39   11.70
  -1   1  20   70.59   11.80
  -1  -1 -20   88.79   11.70
   1  -1  20   78.99   11.50
   1   1 -20   80.59   13.10
  -1  -1 -20   84.59   13.30
  -1  -1  20   81.59   11.50
   1  -1 -20  113.09   15.00
  -1   1 -20   97.39   14.80
   1   1  20  102.99   13.40
  -2  -1 -20   28.50    9.40
  -2   1  20    5.70    7.50
   2   1 -20   21.80    9.10
  -2  -1 -20    3.60    6.20
  -2  -1  20   10.50    6.80
  -2   1 -20   14.80    7.80
   2  -1 -20   12.80    8.60
   2   1  20   12.80    7.90
  -3   1  20   15.10    7.70
  -3  -1 -20   22.70    8.70
   3   1 -20    3.30    6.70
  -3  -1 -20    7.80    7.40
   3   1  20    5.00   10.80
  -3   1 -20    5.10    7.20
  -3  -1  20    0.70    6.30
   3  -1 -20   10.90    7.20
  -3   1 -20    0.00    6.90
  -4  -1 -20   33.80   10.00
  -4  -1 -20   24.20    9.60
   4   1 -20   33.00   10.00
  -4   1  20   14.90    8.20
  -4  -1 -20   37.80    9.80
   4  -1 -20   21.70    8.90
  -4  -1  20   20.80    9.40
  -4   1 -20   23.80    8.90
  -4   1 -20   12.20    7.60
  -4   1 -20   42.80   11.20
   5   1 -20   45.80   10.40
  -5  -1 -20   74.29   14.20
   5  -1 -20   29.40    9.90
  -5   1 -20   76.89   12.00
  -5   1 -20   47.30   11.90
  -5   1 -20   76.79   12.00
  -5  -1  20   64.59   11.80
   0   2 -20  295.37   21.60
   0  -2 -20  263.37   19.90
   0  -2  20  286.57   20.10
   0   2  20  259.17   19.60
  -1  -2 -20  185.18   17.10
  -1   2  20  209.08   18.00
   1   2 -20  221.08   18.30
  -1  -2 -20  178.88   14.00
   1   2  20  214.08   17.30
   1  -2 -20  219.88   18.30
  -1  -2  20  209.68   15.90
  -1   2 -20  206.78   17.90
  -2  -2 -20  270.67   17.80
  -2  -2 -20  286.57   20.80
  -2   2  20  304.87   20.90
   2   2 -20  313.77   22.00
   2   2  20  248.68   19.30
  -2   2 -20  315.27   21.20
   2  -2 -20  282.37   20.90
  -2  -2  20  285.97   19.70
   3   2 -20    8.10    7.40
  -3  -2 -20   15.50    8.50
  -3  -2 -20   18.50    7.80
  -3   2  20    1.50    7.50
  -3  -2 -20    6.40    6.80
  -3  -2 -20   -4.10    7.20
  -3   2 -20   25.40   10.00
   3   2  20    4.80    7.40
  -3   2 -20    8.40    8.40
   3  -2 -20   11.80    7.90
  -3  -2  20    7.30    7.40
  -4  -2 -20   96.69   13.80
  -4  -2 -20  137.29   15.60
  -4   2  20   86.49   13.50
  -4  -2 -20  125.09   14.30
   4   2 -20  117.69   15.20
  -4   2 -20  118.59   15.50
   4  -2 -20  122.59   15.60
  -4   2 -20  139.99   17.90
  -4  -2  20  110.39   14.00
  -5  -2 -20   15.90    8.60
   5   2 -20   16.30    8.40
   5  -2 -20   15.40    9.00
  -5   2 -20   15.40    7.30
  -5   2 -20   33.90   10.10
  -5  -2  20   23.70    9.30
   0   3  20  574.34   28.30
   0   3 -20  554.34   30.30
   0  -3 -20  500.25   28.10
  -1  -3 -20    7.20    7.80
   1   3 -20   38.10   10.60
  -1  -3 -20   30.60    9.40
  -1   3  20   14.20    9.10
   1  -3 -20   47.10   10.90
  -1   3 -20   15.30    9.00
   1   3  20   35.10    9.30
   2   3 -20   23.20   10.00
  -2  -3 -20   32.50    9.00
  -2  -3 -20   19.50    9.60
  -2   3  20   24.70    8.90
   2   3  20   35.60    9.70
  -2  -3  20   26.10    8.10
   2  -3 -20   34.60   10.30
  -2   3 -20   28.80   10.70
  -3   3  20    0.50    6.80
  -3   3  20   16.20    8.00
  -3  -3 -20   14.20    8.10
  -3  -3 -20    9.10    7.10
   3   3 -20   17.10    8.40
  -3  -3 -20   13.80    8.20
  -3   3 -20   17.00    9.60
   3   3  20   14.40    8.40
   3  -3 -20   11.20    8.50
  -3  -3  20    9.50    7.90
  -4  -3 -20   42.20   12.10
  -4   3  20   48.10   10.30
  -4  -3 -20   25.50   11.50
  -4  -3 -20   44.50   11.00
   4   3 -20   28.20   10.10
   4   3  20   32.90   10.40
  -4   3 -20   45.20   19.80
  -4   3 -20   37.70   10.10
  -4  -3  20   21.90    8.90
   0  -4 -20    3.60    7.80
   0   4 -20   19.30    9.20
   0   4  20    5.50    7.00
   0   4  20    4.40    7.20
   1   4 -20  101.69   15.30
  -1   4  20   79.89   11.90
  -1   4  20   84.29   13.20
  -1  -4 -20   61.39   11.70
   1  -4 -20  108.09   15.50
   1   4  20  108.49   15.30
  -1   4 -20   52.79   13.30
   2   4 -20   24.10    9.70
  -2  -4 -20   24.80    9.60
  -2   4  20   29.90    8.50
  -2  -4 -20   20.10    8.30
  -2   4  20   10.60    7.80
   2  -4 -20   24.10    9.90
  -2   4 -20   18.40    9.10
   2   4  20   32.60   10.10
  -3   4  20   27.80    8.60
   3   4 -20   32.80   10.10
  -3  -4 -20   29.80    9.40
  -3  -4 -20   16.20   10.20
  -3   4 -20   18.30    9.70
   3  -4 -20   26.50   10.10
   3   4  20   42.40   12.00
   0   5  20   60.99   11.30
   0   5 -20  104.69   24.00
   0  -5 -20   43.30   11.00
   0   5  20   52.39   11.50
   0  -5 -20   50.19   12.70
  -1  -5 -20   20.80    9.50
  -1   5  20   14.60    8.30
  -1  -5 -20    1.60    7.80
   1  -5 -20    7.70    8.60
   1   5  20    6.20    8.20
   1   5  20   14.00    8.10
  -2   5  20    9.20    7.50
  -2  -5 -20   10.20    8.60
  -2  -5 -20    2.50    9.20
   2   5  20   16.60    9.50
   0   0  21   -6.70    6.20
   0   0 -21   -1.20    6.30
  -1   0  21   14.70    7.50
  -1   0 -21   -0.30    7.10
   1   0 -21   18.30    8.60
   1   0  21   -1.00    5.80
   2   0 -21   31.40   10.70
  -2   0 -21   35.80   10.00
  -2   0  21   24.20    8.50
  -2   0 -21   13.10    8.30
  -3   0  21   67.69   12.10
  -3   0 -21   53.89   10.80
   3   0 -21   59.19   11.90
  -3   0 -21   55.49   12.80
  -4   0 -21   18.40    8.50
  -4   0 -21    2.20    7.50
  -4   0 -21   15.80    9.00
  -4   0  21   21.50    8.40
   4   0 -21   -1.70    6.40
  -5   0 -21    0.00    9.40
   5   0 -21   18.10    8.60
   0   1  21  205.68   16.80
   0  -1 -21  213.98   18.30
   0  -1  21  240.88   17.70
   0   1 -21  210.48   18.90
  -1   1  21   13.40    7.60
   1   1 -21    2.50    7.00
  -1  -1 -21    3.00    7.30
  -1  -1 -21    7.70    6.80
  -1   1 -21    6.20    8.30
   1  -1 -21   -6.00    6.90
   1   1  21    1.10    6.20
  -1  -1  21    3.30    6.40
  -2  -1 -21  374.56   23.60
  -2  -1 -21  342.97   21.30
  -2   1  21  350.96   21.90
   2   1 -21  358.16   23.10
   2  -1 -21  368.46   24.30
  -2  -1  21  351.76   21.60
   2   1  21  374.46   21.70
  -2   1 -21  339.27   22.50
  -3  -1 -21    8.60    8.30
  -3   1  21   13.20    8.40
  -3  -1 -21   10.40    7.60
   3   1 -21   14.30    8.90
  -3   1 -21   13.60    7.80
  -3   1 -21    5.30    8.80
  -3  -1  21    9.40    7.40
   3  -1 -21    9.10    8.50
  -4  -1 -21  104.39   14.90
  -4  -1 -21  111.89   13.90
  -4  -1 -21  102.19   15.20
  -4   1  21  114.29   14.40
   4   1 -21   90.39   13.10
  -4   1 -21  108.69   13.90
  -4   1 -21   72.29   13.90
   4  -1 -21  106.29   15.60
  -4   1 -21  114.79   13.50
  -4  -1  21   87.59   14.00
   0   2 -21   -6.60    6.80
   0  -2 -21   11.20    8.70
   0   2  21   -0.30    6.30
  -1   2  21  106.09   13.70
  -1  -2 -21   93.79   14.20
   1   2 -21   89.99   14.00
   1  -2 -21  108.59   15.70
  -1  -2  21  127.99   14.30
   1   2  21  130.99   14.30
  -1   2 -21  115.29   16.40
   2   2 -21   36.50   11.00
  -2  -2 -21   29.50    8.40
  -2  -2 -21   21.70    8.80
  -2   2  21   17.10    8.10
  -2  -2  21   29.80    8.60
  -2   2 -21   24.70    9.70
   2   2  21   24.00    9.00
   2  -2 -21   30.40   10.80
  -3   2  21   38.20   10.00
   3   2 -21   51.99   11.00
  -3  -2 -21   59.39   11.50
  -3  -2 -21   46.60    9.90
  -3  -2 -21   47.70   10.80
  -3  -2 -21   69.09   11.30
  -3  -2  21   45.80   10.50
   3   2  21   44.60   10.70
  -3   2 -21   46.60   11.10
   3  -2 -21   56.49   11.70
  -3   2 -21   51.79   12.10
  -4  -2 -21   15.40    8.20
  -4   2  21   -4.20   11.70
   4   2 -21   30.50    9.70
  -4  -2 -21   17.80    9.10
  -4  -2  21   23.80    9.10
  -4   2 -21   29.90   10.60
  -4   2 -21   11.30    8.90
   4  -2 -21   23.20    8.50
   0   3 -21    4.40    7.90
   0  -3 -21   14.60    8.70
   0   3  21   21.50    8.70
  -1   3  21   25.20    9.90
  -1  -3 -21   27.40    9.60
   1   3 -21   34.70   11.20
  -1  -3 -21   29.20    9.40
  -1   3 -21   26.30   10.10
   1   3  21   37.90   11.10
   1  -3 -21   33.20   11.00
  -2  -3 -21  205.28   16.50
  -2   3  21  181.38   17.00
   2   3 -21  197.28   18.10
  -2  -3 -21  187.28   18.50
   2   3  21  175.18   17.00
  -2   3 -21  245.98   20.60
   2  -3 -21  183.58   18.20
  -3   3  21   17.10    9.10
  -3  -3 -21   26.80    9.40
   3   3 -21   15.80    9.50
  -3  -3 -21   16.80    8.60
  -3  -3 -21   47.90   11.50
  -3   3 -21   12.50    8.70
   3  -3 -21   31.30   10.90
  -3  -3  21   35.20   10.20
   3   3  21   32.30   10.40
  -4  -3 -21   29.40    9.70
   4   3 -21    8.90    8.70
  -4  -3  21   19.70    8.70
  -4   3 -21   26.20    9.40
   0   4  21   53.49   11.30
   0   4 -21   25.90   10.30
   0  -4 -21   45.30   11.00
  -1  -4 -21   12.90    9.00
  -1   4  21    9.70    8.70
   1   4 -21   32.70   10.70
   1   4  21   17.20    9.10
   1  -4 -21   14.80    9.40
  -1   4 -21   17.90    9.30
   2   4 -21    2.80    9.20
  -2  -4 -21   13.10    9.30
  -2   4  21   12.40   12.30
  -2  -4 -21   17.30    8.90
  -2   4 -21   19.30    9.70
   2   4  21   10.20    8.20
   2  -4 -21   21.40    9.70
  -3  -4 -21   14.40    8.20
  -3   4 -21    5.30    8.20
   3   4  21   13.60    9.10
   0  -5 -21    4.40    7.80
  -1  -5 -21   80.99   14.50
  -1  -5 -21   73.29   14.20
   0   0 -22   -6.60    7.30
   0   0  22   -3.80    5.50
  -1   0 -22    4.40    8.30
   1   0 -22   15.70    8.30
   1   0  22   11.10    8.00
  -1   0  22   10.30    7.30
  -2   0  22  206.68   17.60
  -2   0 -22  207.38   19.20
  -2   0 -22  231.48   19.00
   2   0 -22  218.78   19.10
  -3   0 -22   24.20    9.20
  -3   0  22    1.10    7.50
  -3   0 -22    4.10    8.60
   3   0 -22   36.00   10.40
  -4   0 -22  216.38   19.00
  -4   0 -22  239.78   19.80
   4   0 -22  229.68   19.20
  -4   0  22  283.67   20.40
   0  -1  22   -2.80    6.60
   0  -1 -22    1.60    6.90
   0   1 -22   -6.90    7.00
   0   1  22    9.90    8.10
  -1  -1 -22   32.00    9.00
  -1  -1 -22   35.80   10.50
   1   1 -22   31.50    9.70
  -1   1  22   29.10    9.70
  -1   1 -22   50.69   11.20
  -1  -1  22   32.90    8.90
   1  -1 -22   36.30   10.50
   1   1  22   38.70    9.60
   2   1 -22   57.69   12.00
  -2  -1 -22   52.99   10.80
  -2  -1 -22   43.60   11.30
  -2   1  22   44.30   10.60
  -2  -1  22   38.00    9.20
   2  -1 -22   44.50   11.20
  -2   1 -22   32.60   10.00
   2   1  22   46.00   10.60
  -3  -1 -22    6.10    7.60
  -3   1  22   20.20    9.60
   3   1 -22   11.70    7.90
  -3  -1 -22   16.30    9.40
   3  -1 -22    8.50    7.90
  -3   1 -22   12.10    9.60
  -3  -1  22   15.40    8.60
  -3   1 -22   10.20    7.70
   4   1 -22    9.40    8.30
  -4  -1 -22    8.50    8.70
  -4  -1 -22    6.40    8.00
   4  -1 -22   -6.30    6.30
  -4   1 -22    3.80    9.60
  -4  -1  22    6.90    7.40
  -4   1 -22    6.90    8.00
   0   2 -22  356.66   24.30
   0   2  22  432.86   24.30
   0  -2 -22  383.26   24.70
  -1   2  22   29.30    9.80
   1   2 -22   70.39   13.70
  -1  -2 -22   56.39   12.80
  -1   2 -22   50.79   12.00
   1  -2 -22   53.99   11.70
   1   2  22   40.10   11.00
   2   2 -22   60.79   12.60
  -2  -2 -22   98.19   15.40
  -2   2  22   66.19   12.80
   2  -2 -22   66.29   12.80
  -2  -2  22   73.69   12.60
   2   2  22   59.39   11.30
  -2   2 -22   80.99   14.50
  -3   2  22   33.70   10.00
  -3  -2 -22   44.70   12.30
   3   2 -22   22.30    9.00
  -3  -2 -22   35.90    9.10
  -3  -2 -22   31.60   10.40
  -3  -2 -22   22.10   10.00
   3  -2 -22   28.60   11.30
  -3  -2  22   26.90    9.00
  -3   2 -22   19.50    9.10
  -3   2 -22   28.30    9.80
  -4  -2 -22   87.29   12.80
  -4  -2 -22  118.79   15.40
   4   2 -22   63.59   12.10
  -4  -2  22  107.29   15.60
   4  -2 -22   83.49   16.00
  -4   2 -22   98.59   14.10
   0  -3 -22    3.40    7.90
   0   3  22    8.70    8.70
   0   3 -22    6.00    7.70
  -1   3  22   30.70   10.10
  -1  -3 -22   21.30    9.40
   1   3 -22   29.30   10.00
  -1  -3 -22   45.60   10.40
   1  -3 -22   48.50   11.60
  -1   3 -22   26.80   11.00
   1   3  22   22.20    9.30
   2   3 -22   36.60   11.40
  -2  -3 -22   32.70    9.20
  -2   3  22   28.90   10.00
  -2  -3 -22   27.10   10.20
   2   3  22   36.50   10.20
   2  -3 -22   26.30   10.00
  -2   3 -22   17.00    9.00
   3   3 -22   -2.10    9.30
  -3  -3 -22   -3.80    7.20
  -3  -3 -22   -1.80    7.00
   3   3  22   13.70    9.40
  -3   3 -22    2.70    8.50
   0   4  22  156.28   16.10
   0  -4 -22  109.19   15.30
  -1  -4 -22   14.40    9.10
   1   4  22    1.60    7.20
   1  -4 -22   -0.10    9.50
  -2  -4 -22  125.09   14.50
   2   4  22  115.39   15.30
   0   0 -23   -2.10    6.70
   0   0  23  -11.50    5.80
  -1   0  23   30.90    9.00
  -1   0 -23   33.40   10.60
   1   0 -23   33.20   10.60
   2   0 -23   10.10    7.90
  -2   0 -23    0.40    7.70
  -2   0 -23   -1.70    6.60
  -2   0  23  -12.40    6.30
  -3   0 -23  126.29   16.20
  -3   0  23  101.29   14.40
   3   0 -23  110.39   15.10
  -3   0 -23   95.09   14.90
   0   1  23   13.70    8.40
   0  -1 -23   31.60   10.90
   0   1 -23   21.50   10.50
   1   1 -23   15.00    9.10
  -1  -1 -23    1.10   10.00
  -1  -1 -23    2.10    8.80
  -1   1  23   -7.70    7.60
   1  -1 -23   -1.00    8.30
  -1  -1  23    0.10    6.30
  -1   1 -23    7.90    8.10
   1   1  23   -0.40    6.60
  -2   1  23   74.49   13.10
  -2  -1 -23   58.19   11.30
  -2  -1 -23   72.69   13.60
   2   1 -23   97.19   15.50
   2  -1 -23   70.69   13.50
  -2   1 -23   72.89   13.10
  -2   1 -23  103.89   14.20
  -2  -1  23   80.29   13.40
   3   1 -23   10.60    9.20
  -3  -1 -23   13.20    8.10
  -3   1  23   25.50   10.00
  -3  -1 -23    5.70    8.40
   3  -1 -23   13.30    8.90
  -3   1 -23    8.70    9.00
  -3   1 -23   10.20    9.00
  -3  -1  23    5.20    7.60
   0   2  23  274.37   20.00
   0   2 -23  235.18   21.20
   0  -2 -23  250.47   20.90
   1   2 -23   21.20   10.70
  -1  -2 -23   22.00    9.60
  -1   2  23   22.50    9.10
   1  -2 -23   32.30   11.20
  -1   2 -23   51.89   12.00
   1   2  23   35.30   10.10
  -2   2  23   23.90    9.70
   2   2 -23   11.30    8.80
  -2  -2 -23   38.80   11.20
   2   2  23   19.90    9.30
  -2   2 -23   27.90   10.80
  -2  -2  23   21.80   10.30
   2  -2 -23   30.30   13.10
  -3  -2 -23   19.80    9.70
  -3  -2 -23   -1.30    6.50
  -3  -2  23   15.80    9.10
  -3   2 -23    9.80    8.90
   0   3  23   39.80   10.70
  -1  -3 -23   -4.40   13.30
  -1   3  23    1.60    7.40
  -1  -3 -23   12.60    9.20
   1   3  23   -1.30    8.10
  -2  -3 -23    2.90    7.70
   2   3  23  -10.10    6.20
   0   0 -24  131.79   17.60
   0   0  24  118.79   15.50
   1   0 -24   19.20   16.00
  -1   0  24   23.70    9.30
  -1   0 -24   50.99   12.80
  -2   0  24   19.80    9.40
  -2   0 -24   10.10    9.10
  -2   0 -24   18.60   10.20
   0  -1 -24  180.28   22.00
   0   1  24  200.58   18.00
   0   1 -24  215.08   22.50
[truncated: 655 more chars]
